# Supplementary material for: Direct (het)arylation of tetrahydroisoquinolinesviaa metal and oxidant free C(sp3)–H functionalization enabled three component reaction
Source: Royal Society of Chemistry journal article supplement (doi:10.1039/c8ob02309c), 2018-11-26

## Electronic Supplementary Information

### Direct (Het)Arylation of Tetrahydroisoquinoline via a Metal and Oxidant Free C(sp<sup>3</sup>)-H Functionalization Enabled Three Component Reaction

Surajit Halder and Chandan K. Jana\*

Department of Chemistry, Indian Institute of Technology Guwahati, Guwahati, India 781039

E-mail: ckjana@iitg.ac.in

#### Experimental section:

**General:** All reactions involving air- or moisture-sensitive reagents or intermediates were carried out in oven-dried glassware under an argon atmosphere. THF and diethylether (Et<sub>2</sub>O) were freshly distilled from Sodium under argon. Dichloromethane (CH<sub>2</sub>Cl<sub>2</sub>) was freshly distilled from phosphorus(V)oxide (P<sub>2</sub>O<sub>5</sub>). Triethylamine (Et<sub>3</sub>N) was distilled from CaH<sub>2</sub> and stored under argon. Commercial grade xylene, benzene and toluene were distilled before use. All other solvents and reagents were purified according to standard procedures or were used as received from Aldrich, Acros, Merck and Spectrochem. <sup>1</sup>H, <sup>13</sup>C NMR spectroscopy: *Varian Mercury plus 400 MHz* (at 298 K). Chemical shifts,  $\delta$  (in ppm), are reported relative to TMS ( $\delta(^1\text{H})$  0.0 ppm,  $\delta(^{13}\text{C})$  0.0 ppm) which was used as the inner reference. Otherwise the solvents residual proton resonance and carbon resonance (CHCl<sub>3</sub>,  $\delta(^1\text{H})$  7.26 ppm,  $\delta(^{13}\text{C})$  77.0 ppm; CD<sub>3</sub>OD, (<sup>1</sup>H) 3.31 ppm,  $\delta(^{13}\text{C})$  49.0 ppm) were used for calibration. Column chromatography: Merck or Spectrochem silica gel 60-120 under gravity. IR: spectra were recorded on Perkin Elmer Instrument at normal temperature making KBr pellet grinding the sample with KBr (IR Grade). MS (ESI-HRMS): Mass spectra were recorded on a Agilent Accurate-Mass Q-TOF LC/MS 6520, and peaks are given in *m/z* (% of basis peak). X-ray crystallographic data were collected using a Bruker SMART APEX-II CCD diffractometer, equipped with a fine focus 1.75 kW sealed tube Mo-K $\alpha$  radiation ( $\lambda = 0.71073 \text{ \AA}$ ) at 296(2) K, with increasing  $\omega$  (width of 0.3° per frame) at a scan speed of 3 s/frame. Structures were solved by direct methods using SHELXS-97 and refined with full matrix least squares on  $F^2$  using SHELXL-97. Using Olex2, structure was solved with the Super flip structure solution program using Charge Flipping and refined with the olex2.refine refinement

package using Gauss–Newton minimization. All the non–hydrogen atoms were refined anisotropically.

### Crystal Structures:

Crystal data and structure refinement for **4g** (CCDC 1868392).

|                                                                                   |                                                                                    |
|-----------------------------------------------------------------------------------|------------------------------------------------------------------------------------|
| 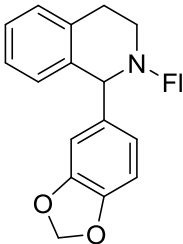 |  |
| Crystal data and structure refinement for <b>4g</b>                               |                                                                                    |
| Empirical formula                                                                 | C <sub>29</sub> H <sub>23</sub> N O <sub>3</sub>                                   |
| Formula weight                                                                    | 433.48                                                                             |
| Crystal habit, colour                                                             | needle / colorless                                                                 |
| Crystal size, mm <sup>3</sup>                                                     | 0.24* 0.17* 0.15                                                                   |
| Temperature, <i>T</i>                                                             | 293(2) K                                                                           |
| Wavelength, $\lambda$ (Å)                                                         | 0.71073                                                                            |
| Crystal system                                                                    | monoclinic                                                                         |
| Space group                                                                       | ' <i>P</i> 21/ <i>n</i> '                                                          |
| Unit cell dimensions                                                              | <i>a</i> = 15.1652(8)Å                                                             |
|                                                                                   | <i>b</i> = 15.1364(13)Å                                                            |
|                                                                                   | <i>c</i> = 19.9955(13)Å                                                            |
|                                                                                   | $\alpha = 90.00^\circ$ , $\gamma = 90.00^\circ$ , $\beta = 106.480(6)^\circ$       |
| Volume, <i>V</i> (Å <sup>3</sup> )                                                | 4401.3(5)                                                                          |
| <i>Z</i>                                                                          | 8                                                                                  |
| Calculated density, Mg·m <sup>−3</sup>                                            | 1.308                                                                              |
| Absorption coefficient, $\mu$ (mm <sup>−1</sup> )                                 | 0.085                                                                              |
| <i>F</i> (000)                                                                    | 1824                                                                               |

|                                        |                                                              |
|----------------------------------------|--------------------------------------------------------------|
| $\theta$ range for data collection     | 3.00 ° to 25.00°                                             |
| Limiting indices                       | $-18 \leq h \leq 18, -16 \leq k \leq 18, -23 \leq l \leq 23$ |
| Reflection collected / unique          | 16211 / 3089 [ $R(\text{int}) = 0.1058$ ]                    |
| Completeness to $\theta$               | 98.7% ( $\theta = 25.00^\circ$ )                             |
| Max. and min. transmission             |                                                              |
| Refinement method                      | 'SHELXL-97 (Sheldrick, 1997)'                                |
| Data / restraints / parameters         | 7645 / 0 / 597                                               |
| Goodness-of-fit on $F^2$               | 0.885                                                        |
| Final $R$ indices [ $I > 2\sigma(I)$ ] | $R1 = 0.0840, wR2 = 0.1888$                                  |
| $R$ indices (all data)                 | $R1 = 0.3467, wR2 = 0.2036$                                  |
| Largest diff. peak and hole            | 0.574 and -0.650 $\text{\AA}^{-3}$                           |

**1-(2-(9H-fluoren-9-yl)-1,2,3,4-tetrahydroisoquinolin-1-yl)naphthalen-2-ol (3):** According to

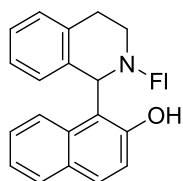

general procedure I, 9-fluorenone imine (0.3 mmol, 1.2 equiv, 54 mg), 1,2,3,4-tetrahydroisoquinoline (0.75 mmol, 3 equiv, 96  $\mu\text{L}$ ) and 2-naphthol (0.25 mmol, 1.0 equiv, 36 mg) were reacted for 48h. Then the reaction mixture was dissolved in methanol and the solid product was precipitated from reaction mixture. The solid was filtered and washed with (3 $\times$ 5 mL) methanol to obtain the desired product **3** (70 mg) as light brown solid. Next, mother liquor was evaporated under reduced pressure and residue was purified by  $\text{SiO}_2$  column chromatography (Ethyl acetate: hexane; 1:20) to give an additional amount (20 mg) of the product. The combined yield is 90 mg (82%). FTIR (KBr):  $\tilde{\nu} = 3056, 3033, 2838, 1619, 1462, 1448, 1268, 1227, 811, 741, 531 \text{ cm}^{-1}$ .  $^1\text{H}$  NMR (400 MHz,  $\text{CDCl}_3$ )  $\delta = 11.77$  (s, 1H), 8.37 (d,  $J = 8.4 \text{ Hz}$ , 1H), 7.86 (d,  $J = 7.6 \text{ Hz}$ , 1H), 7.83 – 7.79 (m, 3H), 7.7 – 7.65 (m, 2H), 7.63– 7.61 (m, 1H), 7.42 – 7.38 (m, 1H), 7.38 – 7.33 (m, 3H), 7.27 – 7.20 (m, 2H), 7.1 – 7.03 (m, 2H), 6.94 – 6.90 (m, 1H), 6.80 (d,  $J = 7.6 \text{ Hz}$ , 1H), 6.65 (s, 1H), 4.98 (s, 1H), 3.13 – 3.02 (m, 1H), 2.64 – 2.51 (m, 2H), 2.48 – 2.44 (m, 1H).  $^{13}\text{C}$  NMR (151 MHz,  $\text{CDCl}_3$ )  $\delta = 155.8, 144.0, 142.1, 141.4, 141.2, 136.6, 134.4, 134.3, 130.3, 129.5, 129.0, 128.7, 128.66, 128.56, 128.2, 127.9, 127.7, 127.1, 126.8, 126.6, 126.4, 125.9, 123.0, 121.5, 120.5, 120.1, 119.6, 118.0, 65.2, 60.7, 43.2, 29.9 \text{ ppm}$ . HRMS (ESI) exact mass calculated for  $\text{C}_{32}\text{H}_{26}\text{N}_5\text{O}^+([\text{M}+\text{H}]^+)$ : 440.2009, found: 440.2001.

**1-(2-benzyl-1,2,3,4-tetrahydroisoquinolin-1-yl)naphthalen-2-ol (3a) and 1-((3,4-dihydroisoquinolin-2(1H)-yl)(phenyl)methyl)naphthalen-2-ol :** According to general procedure

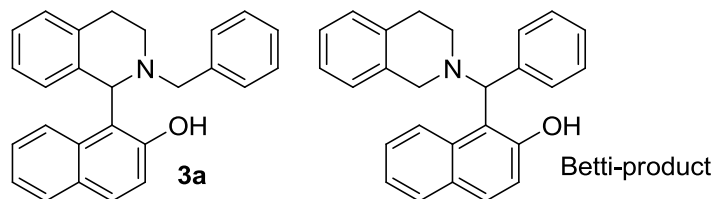

I, benzaldehyde (0.24 mmol, 1.2 equiv, 25  $\mu$ L), 1,2,3,4-tetrahydroisoquinoline (0.6 mmol, 3 equiv, 76  $\mu$ L) and 2-naphthol (0.20 mmol, 1 equiv, 29 mg),

in neat condition were reacted for 48h. After completion of the reaction, the reaction mixture was dissolved in methanol and solution mixture was evaporated under reduce pressure and residue was purified by SiO<sub>2</sub> column chromatography (ethyl acetate: hexane; 1:50) to obtain the oxazine corresponding to Betti product as light yellow solid (26 mg, 36%) and with (ethyl acetate: hexane; 1:40) to obtain an inseparable mixture of corresponding Betti and  $\alpha$ -arylated product as yellow gum with 2:1 regioisomeric ratio (17 mg, 23%). Characteristic NMR-signals of **3a** and Betti product: <sup>1</sup>H NMR (400 MHz, CDCl<sub>3</sub>)  $\delta$  = 13.27 (s, 2H) (Betti product), 11.75 (s, 1H) (**3a**), 5.54 (s, 1H) (**3a**), 5.22 (s, 2H) (Betti product), 4.05 (d,  $J$  = 13.2 Hz, 1H) (**3a**), 3.21 (d,  $J$  = 13.2 Hz, 1H) (**3a**). HRMS (ESI) exact mass calculated for C<sub>26</sub>H<sub>24</sub>NO<sup>+</sup> ([M+H]<sup>+</sup>): 366.1852, found 366.1851.

**1-(2-(9H-fluoren-9-yl)-1,2,3,4-tetrahydroisoquinolin-1-yl)-7-methoxynaphthalen-2-ol (4a):**

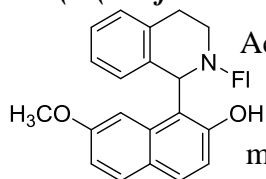

According to general procedure I, 9-fluorenone imine (0.3 mmol, 1.2 equiv, 54 mg), 1,2,3,4-tetrahydroisoquinoline (0.75 mmol, 3 equiv, 96  $\mu$ L) and 7-methoxy 2- naphthol (0.25 mmol, 1.0 equiv, 43.5 mg), in neat condition were

reacted for 48 h. Then the reaction mixture was dissolved in methanol and the solid product was precipitated from reaction mixture. The solid was filtered and washed with (3 $\times$ 5 mL) methanol to obtain the desired product **4a** (65 mg) as light brown solid. Next, mother liquor was evaporated under reduced pressure and residue was purified by column SiO<sub>2</sub> chromatography (Ethyl acetate: hexane; 1:20) to give an additional amount (23 mg) of the product. The combined yield is 88 mg (75%). FTIR (KBr):  $\tilde{\nu}$  = 3412, 3023, 2962, 2809, 1446, 1262, 742 cm<sup>-1</sup>. <sup>1</sup>H NMR (600 MHz, CDCl<sub>3</sub>)  $\delta$  = 11.67 (s, 1H), 7.85 (d,  $J$  = 7.8 Hz, 1H), 7.81 (d,  $J$  = 7.2 Hz, 1H), 7.75 (d,  $J$  = 8.4 Hz, 1H), 7.71 (d,  $J$  = 9.0 Hz, 1H), 7.67 – 7.66 (m, 2H), 7.62 (d,  $J$  = 7.2 Hz, 1H), 7.39 – 7.34 (m, 3H), 7.23 – 7.21 (m, 1H), 7.11 – 7.05 (m, 4H), 6.97 – 6.94 (m, 1H), 6.87 – 6.85 (m, 1H), 6.57 (s, 1H), 5.00 (s, 1H), 4.05 (s, 3H), 3.09 – 3.00 (m, 1H), 2.64 – 2.61 (m, 1H), 2.57 – 2.43 (m, 2H). <sup>13</sup>C NMR (151 MHz, CDCl<sub>3</sub>)  $\delta$  = 159.5, 156.4, 144.0, 142.1, 141.5, 141.1, 136.7, 135.6, 134.3, 131.0, 130.1,

128.7, 128.67, 128.61, 128.3, 127.8, 126.9, 126.8, 126.6, 126.3, 125.9, 124.4, 120.64, 119.6, 117.6, 117.3, 115.1, 100.9, 65.2, 60.9, 55.6, 43.2, 29.9 ppm. HRMS (ESI) exact mass calculated for  $C_{33}H_{28}NO_2^+$  ( $[M+H]^+$ ): 470.2115, found 470.2118.

***1-(2-(9H-fluoren-9-yl)-1,2,3,4-tetrahydroisoquinolin-1-yl)-7-bromonaphthalen-2-ol (4b):***

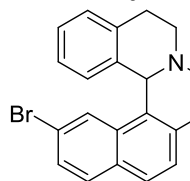

According to general procedure I, 9-fluorenone imine (0.3 mmol, 1.2 equiv, 54 mg), 1,2,3,4-tetrahydroisoquinoline (0.75 mmol, 3 equiv, 96  $\mu$ L) and 7-bromo 2- naphthol (0.25 mmol, 1.0 equiv, 56 mg), in neat condition were reacted for 48 h. Then the reaction mixture was dissolved in methanol and the solid product was precipitated from reaction mixture. The solid was filtered and washed with (3 $\times$ 5 mL) methanol to obtain the desired product **4b** (74 mg) as light brownish solid. Next, mother liquor was evaporated under reduced pressure and residue was purified by SiO<sub>2</sub> column chromatography (Ethyl acetate: hexane; 1:20) to give an additional amount (27 mg) of the product. The combined yield is (78%, 101 mg). FTIR (KBr):  $\tilde{\nu}$  = 3431, 2842, 1589, 1449, 1260, 925, 742  $cm^{-1}$ .  $^1H$  NMR (600 MHz,  $CDCl_3$ )  $\delta$  = 11.88 (s, 1H), 8.52 (s, 1H), 7.78 – 7.71 (m, 4H), 7.65 – 7.60 (m, 2H), 7.48 – 7.47 (m, 1H), 7.38 – 7.30 (m, 4H), 7.23 – 7.20 (m, 1H), 7.10 – 7.05 (m, 2H), 6.97 – 6.94 (m, 1H), 6.77 – 6.75 (m, 1H), 6.51 (s, 1H), 4.92 (s, 1H), 3.10 – 3.00 (m, 1H), 2.67 – 2.59 (m, 1H), 2.54 – 2.50 (m, 2H).  $^{13}C$  NMR (151 MHz,  $CDCl_3$ )  $\delta$  = 156.7, 143.7, 142.0, 141.2, 141.1, 136.1, 135.6, 134.3, 131.0, 130.3, 128.8, 128.76, 128.7, 128.2, 127.8, 127.34, 127.29, 127.0, 126.7, 126.4, 126.3, 125.8, 123.9, 122.3, 120.6, 119.7, 117.4, 65.2, 60.7, 43.2, 29.8 ppm. (Total count of  $^{13}C$  is less than expected due to the merging of signals in the aromatic region). HRMS (ESI) exact mass calculated for  $C_{32}H_{25}BrN^+$  ( $[M+H]^+$ ): 518.1114, found, 518.1120.

***1-(2-(9H-fluoren-9-yl)-1,2,3,4-tetrahydroisoquinolin-1-yl)-6-bromonaphthalen-2-ol (4c):***

According to general procedure I, 9-fluorenone imine (0.3 mmol, 1.2 equiv, 54 mg), 1,2,3,4-tetrahydroisoquinoline (0.75 mmol, 3 equiv, 96  $\mu$ L) and 6- bromo 2- naphthol (0.25 mmol, 1.0 equiv, 56 mg) were reacted for 48 h. Then, the reaction mixture was dissolved in methanol and the solid product was precipitated from reaction mixture. The solid was filtered and washed with (3 $\times$ 5 mL) methanol to obtain the desired product **4c** (68 mg) as light brown solid. Next, mother liquor

was evaporated under reduced pressure and residue was purified by SiO<sub>2</sub> column chromatography

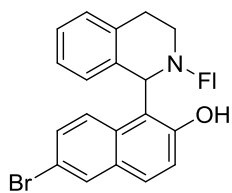

(Ethyl acetate: hexane; 1:20) to give an additional amount (29 mg) of the product. The combined yield is 97 mg (75%). FTIR (KBr):  $\tilde{\nu}$  = 3057, 2842, 1612, 1589, 1507, 1448, 1260, 925, 742 cm<sup>-1</sup>. <sup>1</sup>H NMR (400 MHz, CDCl<sub>3</sub>)  $\delta$  = 11.87 (s, 1H), 8.26 – 8.23 (m, 1H), 8.01 (s, 1H), 7.83 – 7.81 (m, 1H), 7.79 – 7.70 (m, 4H), 7.67 – 7.68 (m, 1H), 7.42 – 7.35 (m, 3H), 7.30 – 7.28 (m, 1H), 7.23 – 7.21 (m, 1H), 7.12 – 7.05 (m, 2H), 6.96 – 6.92 (m, 1H), 6.74 (d,  $J$  = 8.0 Hz, 1H), 6.59 (s, 1H), 4.97 (s, 1H), 3.11 – 3.02 (m, 1H), 2.63 – 2.61 (m, 1H), 2.56 – 2.49 (m, 2H). <sup>13</sup>C NMR (101 MHz, CDCl<sub>3</sub>)  $\delta$  = 156.1, 143.7, 142.0, 141.2, 141.1, 136.1, 134.3, 132.9, 131.3, 130.8, 130.2, 129.4, 128.83, 128.77, 128.7, 128.3, 127.7, 127.2, 127.0, 126.6, 126.2, 125.9, 123.3, 121.3, 120.7, 119.7, 118.3, 116.5, 65.2, 60.7, 43.2, 29.9 ppm. HRMS (ESI) exact mass calculated for C<sub>32</sub>H<sub>25</sub>BrN<sub>5</sub><sup>+</sup> ([M+H]<sup>+</sup>): 518.1114, found, 518.1107.

**2-(2-(9H-fluoren-9-yl)-1,2,3,4-tetrahydroisoquinolin-1-yl)naphthalen-1-ol (4d):** According to

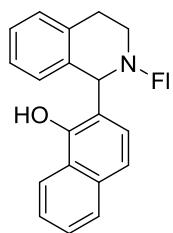

general procedure I, 9-fluorenone imine (0.3 mmol, 1.2 equiv, 54 mg), 1,2,3,4-tetrahydroisoquinoline (0.75 mmol, 3 equiv, 96  $\mu$ L) and 1-naphthol (0.25 mmol, 1.0 equiv, 36 mg) were reacted for 48 h. Then, the reaction mixture was dissolved in methanol and the solid product was precipitated from reaction mixture. The solid was filtered and washed with (3 $\times$ 5 mL) methanol to obtain the desired product **4d** (48 mg) as light brown solid. Next, mother liquor was evaporated under reduced pressure and residue was purified by SiO<sub>2</sub> column chromatography (Ethyl acetate: hexane; 1:20) to give an additional amount (12 mg) of the product. The combined yield is 60 mg (55%). FTIR (KBr):  $\tilde{\nu}$  = 3956, 2838, 1619, 1462, 1448, 1258, 811, 741 cm<sup>-1</sup>. <sup>1</sup>H NMR (600 MHz, CDCl<sub>3</sub>)  $\delta$  = 11.32 (s, 1H), 8.31 – 8.30 (m, 1H), 7.81 (d,  $J$  = 7.2 Hz, 3H), 7.72 (d,  $J$  = 7.2 Hz, 1H), 7.68 – 7.65 (m, 2H), 7.51 (d,  $J$  = 7.8 Hz, 1H), 7.47 – 7.43 (m, 2H), 7.40 – 7.34 (m, 3H), 7.29 – 7.27 (m, 1H), 7.10 – 7.04 (m, 2H), 7.00 – 7.04 (m, 1H), 6.96 – 6.95 (m, 1H), 5.90 (s, 1H), 5.15 (s, 1H), 3.10 – 3.04 (m, 1H), 2.61 – 2.59 (m, 1H), 2.51 – 2.44 (m, 2H). <sup>13</sup>C NMR (151 MHz, CDCl<sub>3</sub>)  $\delta$  = 152.8, 144.0, 142.1, 142.0, 141.2, 136.8, 134.5, 134.2, 128.6, 128.3, 127.6, 127.5, 126.7, 126.5, 126.4, 125.9, 125.8, 125.3, 125.1, 122.6, 122.7, 120.7, 120.5, 119.7, 119.7, 119.6, 119.1, 119.0, 67.3, 65.2, 42.9, 30.0 ppm. HRMS (ESI) exact mass calculated for C<sub>32</sub>H<sub>26</sub>NO<sup>+</sup> ([M+H]<sup>+</sup>): 440.2009, found, 440.2020.

**3-(2-(9H-fluoren-9-yl)-1,2,3,4-tetrahydroisoquinolin-1-yl)benzene-1,2-diol (4e):**

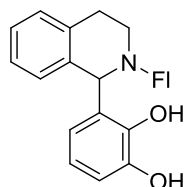

According to general procedure I, 9-fluorenone imine (0.3 mmol, 1.2 equiv, 54 mg), 1,2,3,4-tetrahydroisoquinoline (0.75 mmol, 3 equiv, 96  $\mu$ L) and pyro-catechol (0.25 mmol, 1.0 equiv, 27.5 mg) were reacted for 36 h. After completion of the reaction, the reaction mixture was dissolved in methanol and solution mixture was evaporated under reduce pressure and residue was purified by SiO<sub>2</sub> column chromatography (Ethyl acetate: hexane; 1:10) to obtain **4e** as brown solid 56 mg (53%). FTIR (KBr):  $\tilde{\nu}$  = 3501, 2923, 1602, 1479, 1450, 1259, 1180, 745, 737  $\text{cm}^{-1}$ . <sup>1</sup>H NMR (600 MHz, CDCl<sub>3</sub>)  $\delta$  = 10.85 (s, 1H), 7.74 – 7.72 (m, 2H), 7.68 – 7.67 (m, 2H), 7.41 – 7.38 (m, 2H), 7.36 – 7.33 (m, 1H), 7.29 – 7.24 (m, 1H), 7.13 – 7.11 (m, 2H), 7.08 (d,  $J$  = 7.2 Hz, 1H), 7.06 – 7.04 (m, 1H), 6.99 (d,  $J$  = 7.8 Hz, 1H), 6.96 – 6.94 (m, 1H), 6.92 – 6.89 (m, 1H), 5.75 (s, 1H), 5.60 (s, 1H), 5.09 (s, 1H), 3.01 – 2.95 (m, 1H), 2.59 – 2.56 (m, 1H), 2.43 – 2.41 (m, 2H). <sup>13</sup>C NMR (151 MHz, CDCl<sub>3</sub>)  $\delta$  = 145.8, 143.8, 143.4, 142.0, 141.8, 141.3, 136.0, 134.1, 128.83, 128.77, 128.6, 128.2, 127.1, 126.9, 126.7, 126.5, 125.5, 122.0, 120.6, 120.2, 119.8, 115.1, 66.9, 65.1, 42.7, 29.9 ppm. (Total count of <sup>13</sup>C is less than expected due to the merging of signals in the aromatic region). HRMS (ESI) exact mass calculated for C<sub>24</sub>H<sub>28</sub>N<sub>5</sub><sup>+</sup> ([M+H]<sup>+</sup>): 406.1802, found: 406.1803.

**2-(2-(9H-fluoren-9-yl)-1,2,3,4-tetrahydroisoquinolin-1-yl)-4,5-dimethoxyphenol (4f):**

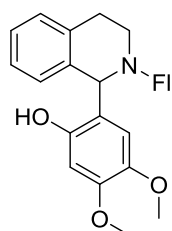

According to general procedure I, 9-fluorenone imine (0.3 mmol, 1.2 equiv, 54 mg), 1,2,3,4-tetrahydroisoquinoline (0.75 mmol, 3 equiv, 96  $\mu$ L) and 3,4-dimethoxy phenol (0.25 mmol, 1.0 equiv, 38 mg) were reacted for 24h. After completion of the reaction, the reaction mixture was dissolved in methanol and solution mixture was evaporated under reduce pressure and residue was purified by SiO<sub>2</sub> column chromatography (Ethyl acetate: hexane; 1:10) to obtain **4f** as brown solid 82 mg (73%). FTIR (KBr):  $\tilde{\nu}$  = 2922, 2845, 1504, 1449, 1191, 1113, 740  $\text{cm}^{-1}$ . <sup>1</sup>H NMR (600 MHz, CDCl<sub>3</sub>)  $\delta$  = 10.07 (s, 1H), 7.76 – 7.74 (s, 3H), 7.69 – 7.65 (m, 1H), 7.42 – 7.31 (m, 3H), 7.29 – 7.24 (m, 1H), 7.13 – 7.05 (m, 3H), 7.03 (s, 1H), 6.98 (s, 1H), 6.54 (s, 1H), 5.64 (s, 1H), 5.18 (s, 1H), 3.96 (s, 3H), 3.84 (s, 3H), 3.01 – 2.91 (m, 1H), 2.58 – 2.52 (m, 1H), 2.48 – 2.35 (m, 2H). <sup>13</sup>C NMR (151 MHz, CDCl<sub>3</sub>)  $\delta$  = 151.2, 150.4, 144.1, 142.3, 142.2, 142.0, 141.1, 136.7, 134.2, 128.7, 128.64, 128.62, 128.2, 128.0, 127.0, 126.8, 126.4, 126.3, 125.7, 120.6, 119.7, 117.2, 115.0, 102.4, 67.0, 65.0, 57.5, 56.0, 43.0, 29.9 ppm. HRMS (ESI) exact mass calculated for C<sub>30</sub>H<sub>28</sub>NO<sub>3</sub><sup>+</sup> ([M+H]<sup>+</sup>): 450.2064, found, 450.2062.

**6-(2-(9H-fluoren-9-yl)-1,2,3,4-tetrahydroisoquinolin-1-yl)benzo[d][1,3]dioxol-5-ol (4g):**

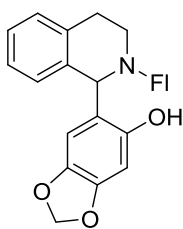

According to general procedure I, 9-fluorenone imine (0.3 mmol, 1.2 equiv, 54 mg), 1,2,3,4-tetrahydroisoquinoline (0.75 mmol, 3 equiv, 96  $\mu$ L) and sesamol (0.25 mmol, 1.0 equiv, 34.5 mg) were reacted for 18 h. After completion of the reaction, the reaction mixture was dissolved in methanol and solution mixture was evaporated under reduce pressure and residue was purified by SiO<sub>2</sub> column chromatography (Ethyl acetate: hexane: 1:10) to obtain **4g** as brown solid 73 mg (67%). FTIR (KBr):  $\tilde{\nu}$  = 2890, 2830, 1479, 1450, 1181, 1033, 743 cm<sup>-1</sup>. <sup>1</sup>H NMR (600 MHz, CDCl<sub>3</sub>)  $\delta$  = 10.30 (s, 1H), 7.73 – 7.70 (m, 3H), 7.67 (d,  $J$  = 7.2 Hz, 1H), 7.40 – 7.38 (m, 2H), 7.36 – 7.33 (m, 1H), 7.27 – 7.24 (m, 1H), 7.12 – 7.07 (m, 2H), 7.02 – 7.01 (m, 3H), 6.51 (s, 1H), 5.95 (d,  $J$  = 1.2 Hz, 1H), 5.90 (d,  $J$  = 1.2 Hz, 1H), 5.61 (s, 1H), 5.17 (s, 1H), 2.98 – 2.92 (m, 1H), 2.55 – 2.52 (m, 1H), 2.43 – 2.36 (m, 2H). <sup>13</sup>C NMR (151 MHz, CDCl<sub>3</sub>)  $\delta$  = 152.1, 148.5, 144.0, 142.0, 141.1, 140.7, 136.5, 134.3, 128.7, 128.6, 128.2, 127.9, 127.1, 126.8, 126.4, 126.3, 125.7, 120.6, 119.7, 117.9, 110.17, 101.3, 100.1, 67.1, 64.9, 42.9, 29.9 ppm. (Total count of <sup>13</sup>C is less than expected due to the merging of signals in the aromatic region). HRMS (ESI) exact mass calculated for C<sub>29</sub>H<sub>24</sub>NO<sub>3</sub><sup>+</sup> ([M+H]<sup>+</sup>): 434.1751, found, 434.1759.

**5-(2-(9H-fluoren-9-yl)-1,2,3,4-tetrahydroisoquinolin-1-yl)quinolin-6-ol (4h):** According to

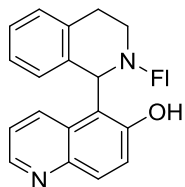

general procedure I 9-fluorenone imine (0.3 mmol, 1.2 equiv, 54 mg), 1,2,3,4-tetrahydroisoquinoline (0.75 mmol, 3 equiv, 96  $\mu$ L) and 6-hydroxyquinol (0.25 mmol, 1.0 equiv, 36 mg) were reacted for 24 h. After, the completion of the reaction, the reaction mixture was dissolved in methanol and solution mixture was evaporated under reduce pressure and residue was purified by SiO<sub>2</sub> column chromatography (Ethyl acetate: hexane) to obtain **4h** as brown solid 62 mg (56%). FTIR (KBr):  $\tilde{\nu}$  = 2915, 2841, 1610, 1447, 1249, 1128, 828, 742, 728 cm<sup>-1</sup>. <sup>1</sup>H NMR (400 MHz, CDCl<sub>3</sub>)  $\delta$  = 11.83 (s, 1H), 8.85 (d,  $J$  = 3.8 Hz, 1H), 8.68 (s, 1H), 8.07 (d,  $J$  = 8.8 Hz, 1H), 7.82 (d,  $J$  = 6.8 Hz, 1H), 7.75 – 7.70 (m, 2H), 7.65 (d,  $J$  = 7.2 Hz, 1H), 7.61 – 7.57 (m, 1H), 7.45 – 7.42 (m, 1H), 7.40 – 7.37 (m, 3H), 7.29 – 7.27 (m, 1H), 7.14 – 7.06 (m, 2H), 6.96 – 6.92 (m, 1H), 6.68 (d,  $J$  = 8.0 Hz, 1H), 6.58 (s, 1H), 4.98 (s, 1H), 3.14 – 3.02 (m, 1H), 2.70 – 2.62 (m, 1H), 2.60 – 2.45 (m, 2H). <sup>13</sup>C NMR (151 MHz, CDCl<sub>3</sub>)  $\delta$  = 156.0, 147.3, 144.2, 143.6, 142.1, 141.3, 141.1, 136.1, 134.4, 131.7, 129.6, 129.2, 128.9, 128.8, 128.7, 128.4, 127.7, 127.2, 127.1, 126.7, 126.0, 125.9, 123.7, 122.3, 120.7, 119.7,

117.6, 65.3, 60.3, 43.3, 29.9 ppm. HRMS (ESI) exact mass calculated for  $C_{31}H_{25}N_2O^+$  ( $[M+H]^+$ ): 441.1961, found, 441.1962.

**7-(2-(9H-fluoren-9-yl)-1,2,3,4-tetrahydroisoquinolin-1-yl)quinolin-8-ol (4i):** According to

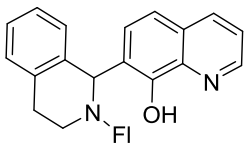

general procedure I, 9-fluorenone imine (0.3 mmol, 1.2 equiv, 54 mg), 1,2,3,4-tetrahydroisoquinoline (0.75 mmol, 3 equiv, 96  $\mu$ L) and 8-hydroxyquinol (0.25 mmol, 1.0 equiv, 36 mg) were reacted for 24 h. After

completion of the reaction, the reaction mixture was dissolved in methanol and solution mixture was evaporated under reduce pressure and residue was purified by  $SiO_2$  column chromatography (Ethyl acetate: hexane; 1:6) to obtain **4i** as brown solid 58 mg (53%). FTIR (KBr):  $\tilde{\nu}$  = 2923, 1629, 1449, 1375, 1090, 742  $cm^{-1}$ .  $^1H$  NMR (600 MHz,  $CDCl_3$ )  $\delta$  = 9.59 (s, 1H), 8.83 (d,  $J$  = 3.0 Hz, 1H), 8.13 (dd,  $J$  = 8.4, 1.2 Hz, 1H), 8.05 (d,  $J$  = 7.8 Hz, 1H), 7.77 (d,  $J$  = 8.4 Hz, 1H), 7.70 (d,  $J$  = 7.8 Hz, 1H), 7.67 – 7.63 (m, 2H), 7.42 – 7.39 (m, 2H), 7.38 – 7.33 (m, 2H), 7.31 – 7.27 (m, 2H), 7.09 – 7.06 (m, 2H), 7.01 – 6.98 (m, 1H), 6.92 (d,  $J$  = 8.4 Hz, 1H), 6.40 (s, 1H), 4.94 (s, 1H), 3.08 – 3.01 (m, 1H), 2.56 – 2.54 (m, 2H), 2.39 – 2.36 (m, 1H).  $^{13}C$  NMR (151 MHz,  $CDCl_3$ )  $\delta$  = 151.7, 148.5, 145.4, 143.6, 141.7, 140.9, 139.0, 138.4, 136.1, 135.4, 129.2, 128.7, 128.69, 128.4, 128.3, 128.2, 127.7, 127.0, 126.8, 126.2, 126.0, 125.5, 125.41, 121.9, 120.3, 119.4, 118.5, 65.3, 61.4, 43.0, 30.5 ppm. HRMS (ESI) exact mass calculated for  $C_{31}H_{25}N_2O^+$  ( $[M+H]^+$ ): 441.1961, found, 441.1961.

**3-(2-(9H-fluoren-9-yl)-1,2,3,4-tetrahydroisoquinolin-1-yl)-4-hydroxy-2H-chromen-2-one (4j):**

According to general procedure I, 9-fluorenone imine (0.3 mmol, 1.2 equiv, 54 mg), 1,2,3,4-

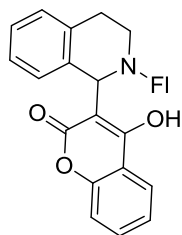

tetrahydroisoquinoline (0.75 mmol, 3 equiv, 96  $\mu$ L) and 4-hydroxy coumarin (0.25 mmol, 1.0 equiv, 36 mg) were reacted for 48 h. Then, the reaction mixture was dissolved in methanol and the solid product was precipitated from reaction mixture. The solid was filtered and washed with (3 $\times$ 5 mL) methanol to obtain the desired product **4j** (70 mg) as light yellow solid. Next, mother liquor was

evaporated under reduced pressure and residue was purified by  $SiO_2$  column chromatography (Ethyl acetate: hexane; 1:20) to give an additional amount (10 mg) of the product. The combined yield is 80 mg (70%). FTIR (KBr):  $\tilde{\nu}$  = 2925, 1671, 1604, 1130, 748, 615  $cm^{-1}$ .  $^1H$  NMR (400 MHz,  $CDCl_3$ )  $\delta$  = 8.00 (d,  $J$  = 7.6 Hz, 1H), 7.93 (d,  $J$  = 7.6 Hz, 1H), 7.70 (d,  $J$  = 7.2 Hz, 1H), 7.64 – 7.59 (m, 2H), 7.51 – 7.51 (m, 2H), 7.46 – 7.36 (m, 3H), 7.34 – 7.24 (m, 3H), 7.19 – 7.10 (m,

2H), 6.98 (d,  $J = 7.2$  Hz, 1H), 6.40 (s, 1H), 5.27 (s, 1H), 3.15 – 3.07 (m, 1H), 2.63 – 2.58 (m, 2H), 2.54 – 2.46 (m, 1H).  $^{13}\text{C}$  NMR (101 MHz,  $\text{CDCl}_3$ )  $\delta = 165.5, 154.4, 142.1, 141.6, 139.5, 136.6, 134.8, 134.7, 132.1, 131.7, 130.3, 130.1, 129.2, 128.8, 128.4, 127.9, 127.8, 127.5, 127.4, 127.4, 125.6, 124.4, 124.20, 123.6, 120.4, 120.2, 116.9, 64.1, 61.6, 42.3, 28.1$  ppm. HRMS (ESI) exact mass calculated for  $\text{C}_{31}\text{H}_{24}\text{NO}_3^+$  ( $[\text{M}+\text{H}]^+$ ): 458.1751, found, 458.1766.

**2-(9H-fluoren-9-yl)-1-(1H-indol-3-yl)-1,2,3,4-tetrahydroisoquinoline (5a):** According to general

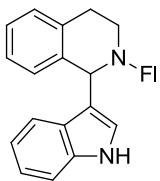

procedure I, 9-fluorenone imine (0.3 mmol, 1.2 equiv, 54 mg), 1,2,3,4-tetrahydroisoquinoline (0.75 mmol, 3 equiv, 96  $\mu\text{L}$ ) and indole (0.25 mmol, 1.0 equiv, 29 mg) were reacted for 48h. After completion of the reaction, the reaction mixture was dissolved in methanol and solution mixture was evaporated under reduce pressure and residue was purified by  $\text{SiO}_2$  column chromatography (Ethyl acetate: hexane; 1:15) to obtain **5a** as brown solid 67 mg (65%). FTIR (KBr):  $\tilde{\nu} = 3328, 2955, 1687, 1274, 117, 742$   $\text{cm}^{-1}$ .  $^1\text{H}$  NMR (400 MHz,  $\text{CDCl}_3$ )  $\delta = 8.06$  (s, 1H), 7.77 (d,  $J = 7.6$  Hz, 2H), 7.68 (d,  $J = 7.2$  Hz, 1H), 7.60 (d,  $J = 7.2$  Hz, 1H), 7.48 – 7.47 (m, 1H), 7.41 – 7.39 (m, 2H), 7.35 – 7.26 (m, 3H), 7.26 – 7.19 (m, 2H), 7.18 – 7.13 (m, 2H), 7.08 – 7.05 (m, 2H), 6.94 – 6.93 (m, 2H), 5.92 (s, 1H), 5.07 (s, 1H), 3.13 – 3.02 (m, 1H), 2.60 – 2.51 (m, 2H), 2.40 – 2.32 (m, 1H).  $^{13}\text{C}$  NMR (151 MHz,  $\text{CDCl}_3$ )  $\delta = 146.5, 144.8, 141.7, 140.6, 139.4, 137.4, 135.8, 128.6, 128.2, 127.8, 127.8, 127.5, 126.5, 126.5, 126.2, 125.9, 125.8, 125.8, 124.9, 122.5, 121.67, 120.3, 119.6, 119.2, 118.4, 111.3, 65.2, 60.9, 43.8, 30.8$  ppm. HRMS (ESI) exact mass calculated for  $\text{C}_{30}\text{H}_{25}\text{N}_2^+$  ( $[\text{M}+\text{H}]^+$ ): 413.2012, found, 413.2017.

**2-(9H-fluoren-9-yl)-1-(2-methyl-1H-indol-3-yl)-1,2,3,4-tetrahydroisoquinoline (5b):** According

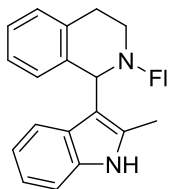

to general procedure I, 9-fluorenone imine (0.3 mmol, 1.2 equiv, 54 mg), 1,2,3,4-tetrahydroisoquinoline (0.75 mmol, 3 equiv, 96  $\mu\text{L}$ ) and 2-methylindole (0.25 mmol, 1.0 equiv, 33 mg) were reacted for 48h. After completion of the reaction, the reaction mixture was dissolved in methanol and solution mixture was evaporated under reduce pressure and residue was purified by  $\text{SiO}_2$  column chromatography (Ethyl acetate: hexane; 1:15) to obtain **5b** as brown solid 64 mg (60 %). FTIR (KBr):  $\tilde{\nu} = 3409, 1601, 1449, 1286, 1217, 742$   $\text{cm}^{-1}$ .  $^1\text{H}$  NMR (600 MHz,  $\text{CDCl}_3$ )  $\delta = 7.83$  (d,  $J = 7.2$  Hz, 1H), 7.80 (s, 1H), 7.74 (d,  $J = 7.8$  Hz, 1H), 7.69 (d,  $J = 7.2$  Hz, 1H), 7.60 (d,  $J = 7.8$  Hz, 1H), 7.39 (d,  $J = 7.8$  Hz, 1H), 7.34 – 7.32 (m, 1H), 7.29 – 7.22 (m, 3H), 7.19 – 7.16 (m, 1H), 7.09 – 7.07 (m, 1H), 7.05

– 7.03 (m, 3H), 6.95 – 6.92 (m, 1H), 6.84 (d,  $J = 7.8$  Hz, 1H), 6.00 (s, 1H), 5.03 (s, 1H), 3.11 – 3.05 (m, 1H), 2.63 – 2.61 (m, 1H), 2.60 (s, 3H), 2.58 – 2.55 (m, 1H), 2.33 – 2.31 (m, 1H).  $^{13}\text{C}$  NMR (151 MHz,  $\text{CDCl}_3$ )  $\delta = 146.7, 144.9, 141.7, 140.5, 139.6, 135.8, 135.4, 133.9, 128.5, 128.1, 127.79, 127.77, 127.5, 126.6, 126.0, 125.9, 125.9, 125.8, 121.4, 120.4, 119.5, 119.2, 113.9, 110.3, 65.4, 59.3, 44.1, 30.9, 12.7$  ppm. (Total count of  $^{13}\text{C}$  is less than expected due to the merging of signals in the aromatic region). HRMS (ESI) exact mass calculated for  $\text{C}_{31}\text{H}_{27}\text{N}_2^+$  ( $[\text{M}+\text{H}]^+$ ): 427.2169, found, 427.2166.

***Ethyl 3-(2-(9H-fluoren-9-yl)-1,2,3,4-tetrahydroisoquinolin-1-yl)-1H-indole-2-carboxylate (5c):***

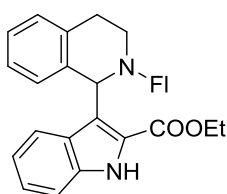

According to general procedure I, 9-fluorenone imine (0.3 mmol, 1.2 equiv, 54 mg), 1,2,3,4-tetrahydroisoquinoline (0.75 mmol, 3 equiv, 96  $\mu\text{L}$ ) and ethyl 1H-indole-2-carboxylate (0.25 mmol, 1.0 equiv, 47 mg) were reacted for 48h. After completion of the reaction, the reaction mixture was dissolved in methanol and solution mixture was evaporated under reduce pressure and residue was purified by  $\text{SiO}_2$  column chromatography (Ethyl acetate: hexane; 1:20) to obtain **5c** as brown solid 72 mg (60%). FTIR (KBr):  $\tilde{\nu} = 3339, 3036, 2971, 2804, 1675, 1541, 1251, 1190, 1092, 748, 735$   $\text{cm}^{-1}$ .  $^1\text{H}$  NMR (600 MHz,  $\text{CDCl}_3$ )  $\delta = 8.87$  (s, 1H), 8.08 – 8.03 (m, 2H), 7.70 – 7.69 (m, 1H), 7.60 (d,  $J = 7.2$  Hz, 1H), 7.38 – 7.35 (m, 2H), 7.28 – 7.25 (m, 3H), 7.17 – 7.15 (m, 1H), 7.10 – 7.08 (m, 2H), 7.06 – 7.04 (m, 1H), 6.97 – 6.94 (m, 1H), 6.91 – 6.90 (m, 2H), 4.86 (s, 1H), 4.60 – 4.51 (m, 2H), 3.19 – 3.13 (m, 1H), 2.63 – 2.57 (m, 2H), 2.35 – 2.70 (m, 1H), 1.50 (t,  $J = 6.6$  Hz, 3H).  $^{13}\text{C}$  NMR (151 MHz,  $\text{CDCl}_3$ )  $\delta = 162.5, 146.3, 144.3, 141.7, 140.7, 138.5, 136.8, 135.1, 128.7, 128.1, 127.9, 127.4, 126.6, 126.57, 126.1, 126.07, 126.01, 125.9, 124.7, 120.2, 119.2, 111.8, 65.9, 61.5, 58.8, 43.4, 30.9, 14.7$  ppm. (Total count of  $^{13}\text{C}$  is less than expected due to the merging of signals in the aromatic region). HRMS (ESI) exact mass calculated for  $\text{C}_{33}\text{H}_{29}\text{N}_2\text{O}_2^+$  ( $[\text{M}+\text{H}]^+$ ): 485.2224, found, 485.2230.

***(3-(2-(9H-fluoren-9-yl)-1,2,3,4-tetrahydroisoquinolin-1-yl)-1H-indol-2-yl)methanol (5d):***

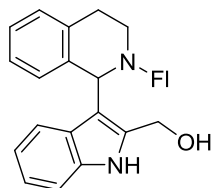

According to general procedure I, 9-fluorenone imine (0.3 mmol, 1.2 equiv, 54 mg), 1,2,3,4-tetrahydroisoquinoline (0.75 mmol, 3 equiv, 96  $\mu\text{L}$ ) and (1H-indol-2-yl)methanol (0.25 mmol, 1.0 equiv, 37 mg) were reacted for 44h. After completion of the reaction, the reaction mixture was dissolved in methanol and solution mixture was evaporated under reduce pressure and residue was purified

by SiO<sub>2</sub> column chromatography (Ethyl acetate: hexane; 1:1) to obtain **5d** as yellow solid 80 mg (72%). FTIR (KBr):  $\tilde{\nu}$  = 3178, 3108, 1448, 1286, 1042, 744, 742 cm<sup>-1</sup>. <sup>1</sup>H NMR (400 MHz, CDCl<sub>3</sub>)  $\delta$  = 8.41 (s, 1H), 7.99 (d,  $J$  = 7.6 Hz, 1H), 7.94 – 7.92 (m, 1H), 7.70 – 7.68 (m, 2H), 7.60 (d,  $J$  = 7.2 Hz, 1H), 7.38 – 7.33 (m, 2H), 7.32 – 7.27 (m, 2H), 7.24 – 7.19 (m, 3H), 7.10 – 7.04 (m, 2H), 6.98 – 6.94 (m, 1H), 6.87 (d,  $J$  = 7.6 Hz, 1H), 6.25 (s, 1H), 5.10 (s, 1H), 4.68 (d,  $J$  = 13.6 Hz, 1H), 4.68 (d,  $J$  = 14.0 Hz, 1H), 3.15 – 3.07 (m, 1H), 2.65 – 2.61 (m, 1H), 2.58 – 2.53 (m, 1H), 2.41 – 2.37 (m, 1H). <sup>13</sup>C NMR (101 MHz, CDCl<sub>3</sub>)  $\delta$  = 145.0, 143.3, 141.9, 140.9, 138.8, 137.3, 135.1, 134.9, 134.9, 129.3, 128.53, 128.35, 128.3, 127.9, 126.9, 126.4, 126.3, 126.1, 125.7, 124.5, 122.2, 120.42, 120.39, 119.4, 115.1, 111.4, 65.4, 58.4, 58.2, 44.0, 30.1 ppm. HRMS (ESI) exact mass calculated for C<sub>31</sub>H<sub>27</sub>N<sub>2</sub>O<sup>+</sup> ([M+H]<sup>+</sup>): 443.2118, found, 443.2128.

***1-(2-(3,4-dimethoxyphenyl)-1H-indol-3-yl)-2-(9H-fluoren-9-yl)-1,2,3,4-tetrahydroisoquinoline***

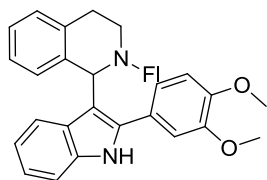

**(5e):** According to general procedure I, 9-fluorenone imine (0.3 mmol, 1.2 equiv, 54 mg), 1,2,3,4-tetrahydroisoquinoline (0.75 mmol, 3 equiv, 96  $\mu$ L) and 2-(3,4-dimethoxyphenyl)-1H-indole (0.25 mmol, 1.0 equiv, 63 mg) were reacted for 48h. Then, the reaction mixture was dissolved in methanol and the solid product was precipitated from reaction mixture. The solid was filtered and washed with (3 $\times$ 5 mL) methanol to obtain the desired product **5e** (60 mg) as light yellow solid. Next, mother liquor was evaporated under reduced pressure and residue was purified by SiO<sub>2</sub> column chromatography (Ethyl acetate: hexane; 1:3) to give an additional amount (10 mg) of the product. The combined yield is 70 mg (51%). FTIR (KBr):  $\tilde{\nu}$  = 3421, 3349, 1510, 1450, 1260, 1242, 1136, 1023, 746 cm<sup>-1</sup>. <sup>1</sup>H NMR (400 MHz, CDCl<sub>3</sub>)  $\delta$  = 8.12 (s, 1H), 7.78 (d,  $J$  = 7.2 Hz, 1H), 7.60 (d,  $J$  = 7.6 Hz, 1H), 7.55 (d,  $J$  = 7.6 Hz, 1H), 7.33 (d,  $J$  = 7.6 Hz, 1H), 7.24 – 7.22 (m, 3H), 7.20 – 7.18 (m, 2H), 7.16 – 7.14 (m, 2H), 7.11 – 7.10 (m, 4H), 7.04 – 7.00 (m, 1H), 6.92 (d,  $J$  = 8.4 Hz, 1H), 6.85 (s, 1H), 5.99 (s, 1H), 4.83 (s, 1H), 3.95 (s, 3H), 3.70 (s, 3H), 3.12 – 3.00 (m, 1H), 2.57 – 2.53 (m, 1H), 2.46 – 2.4 (m, 1H), 2.25 – 2.21 (m, 1H). <sup>13</sup>C NMR (101 MHz, CDCl<sub>3</sub>)  $\delta$  = 149.7, 149.5, 146.6, 144.1, 141.5, 140.6, 139.7, 138.2, 136.5, 135.7, 128.8, 127.8, 127.7, 127.5, 127.4, 126.3, 126.2, 126.1, 126.0, 125.9, 125.88, 122.6, 121.8, 120.0, 119.9, 119.1, 114.2, 112.6, 111.7, 110.8, 65.2, 59.7, 56.3, 56.2, 44.0, 30.7 ppm. HRMS (ESI) exact mass calculated for C<sub>38</sub>H<sub>33</sub>N<sub>2</sub>O<sub>2</sub><sup>+</sup> ([M+H]<sup>+</sup>): 549.2537 found, 549.2569.

**3-(2-(9H-fluoren-9-yl)-1,2,3,4-tetrahydroisoquinolin-1-yl)-1H-indol-5-ol (5f):** According to

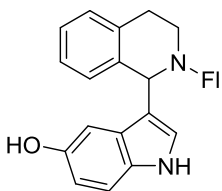

general procedure I, 9-fluorenone imine (0.3 mmol, 1.2 equiv, 54 mg), 1,2,3,4-tetrahydroisoquinoline (0.75 mmol, 3 equiv, 96  $\mu$ L) and 5-hydroxyindole (0.25 mmol, 1.0 equiv, 33 mg) condition were reacted for 44h. After completion of the reaction, the reaction mixture was dissolved in methanol and solution mixture was evaporated under reduce pressure and

residue was purified by SiO<sub>2</sub> column chromatography (Ethyl acetate: hexane; 1:4) to obtain **5f** as brown solid 103 mg (96%). FTIR (KBr):  $\tilde{\nu}$  = 3328, 2923, 1687, 1615, 1247, 1237, 739 cm<sup>-1</sup>. <sup>1</sup>H NMR (600 MHz, CDCl<sub>3</sub>)  $\delta$  = 8.01 (s, 1H), 7.76 (d,  $J$  = 7.2 Hz, 1H), 7.69 (d,  $J$  = 7.2 Hz, 1H), 7.61 (d,  $J$  = 7.2 Hz, 1H), 7.49 (d,  $J$  = 1.8 Hz, 1H), 7.42 (d,  $J$  = 7.2 Hz, 1H), 7.35 – 7.33 (m, 1H), 7.30 – 7.27 (m, 1H), 7.24 – 7.17 (m, 3H), 7.14 (d,  $J$  = 2.4 Hz, 1H), 7.06 (d,  $J$  = 2.4 Hz, 2H), 6.97 – 6.95 (m, 2H), 6.74 – 6.73 (m, 1H), 5.86 (s, 1H), 5.07 (s, 1H), 3.09 – 3.03 (m, 1H), 2.56 – 2.53 (m, 2H), 2.36 – 2.34 (m, 1H). <sup>13</sup>C NMR (151 MHz, CDCl<sub>3</sub>)  $\delta$  = 149.2, 146.4, 144.7, 141.6, 140.5, 139.2, 135.3, 132.6, 128.5, 128.0, 127.74, 127.72, 127.5, 127.2, 127.0, 126.4, 126.1, 125.9, 125.88, 125.7, 120.2, 119.2, 117.5, 112.3, 111.8, 106.0, 65.1, 60.8, 43.7, 30.7 ppm. HRMS (ESI) exact mass calculated for C<sub>30</sub>H<sub>25</sub>N<sub>2</sub>O<sup>+</sup> ([M+H]<sup>+</sup>): 429.1961 found, 429.1962.

**2-(9H-fluoren-9-yl)-1-(5-methoxy-1H-indol-3-yl)-1,2,3,4-tetrahydroisoquinoline (5g):**

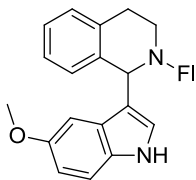

According to the general procedure I, 9-fluorenone imine (0.3 mmol, 1.2 equiv, 54 mg), 1,2,3,4-tetrahydroisoquinoline (0.75 mmol, 3 equiv, 96  $\mu$ L) and 5-methoxyindole (0.25 mmol, 1.0 equiv, 36 mg) were reacted for 48h. After completion of the reaction, the reaction mixture was dissolved in

methanol and solution mixture was evaporated under reduce pressure and residue was purified by SiO<sub>2</sub> column chromatography (Ethyl acetate: hexane; 1:5) to obtain **5g** as brown solid 83 mg (75%). FTIR (KBr):  $\tilde{\nu}$  = 3421, 2924, 1581, 1448, 1201, 741 cm<sup>-1</sup>. <sup>1</sup>H NMR (600 MHz, CDCl<sub>3</sub>)  $\delta$  = 8.06 (s, 1H), 7.77 (d,  $J$  = 7.2 Hz, 1H), 7.69 (d,  $J$  = 7.2 Hz, 1H), 7.61 (d,  $J$  = 7.8 Hz, 1H), 7.45 (s, 1H), 7.43 (d,  $J$  = 7.2 Hz, 1H), 7.35 – 7.32 (m, 1H), 7.30 – 7.27 (m, 1H), 7.23 – 7.21 (m, 3H), 7.20 – 7.17 (m, 1H), 7.06 (s, 2H), 6.96 – 6.95 (m, 2H), 6.83 – 6.82 (m, 1H), 5.89 (s, 1H), 5.10 (s, 1H), 3.78 (s, 3H), 3.09 – 3.03 (m, 1H), 2.57 – 2.54 (m, 2H), 2.37 – 2.35 (m, 1H). <sup>13</sup>C NMR (151 MHz, CDCl<sub>3</sub>)  $\delta$  = 153.7, 146.5, 144.8, 141.6, 140.7, 139.2, 135.4, 132.6, 128.5, 128.2, 127.8, 127.8, 127.4, 127.0, 126.5, 126.2, 125.9, 125.8, 125.76, 125.6, 120.3, 119.3, 118.1, 112.5, 111.9, 103.6,

65.2, 60.8, 56.0, 43.8, 30.9 ppm. HRMS (ESI) exact mass calculated for  $C_{31}H_{27}N_2O^+$  ( $[M+H]^+$ ): 443.2118, found, 443.2126.

**Methyl 3-(2-(9H-fluoren-9-yl)-1,2,3,4-tetrahydroisoquinolin-1-yl)-1H-indole-5-carboxylate**

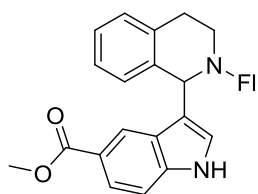

**(5h):** According to general procedure I, 9-fluorenone imine (0.3 mmol, 1.2 equiv, 54 mg), 1,2,3,4-tetrahydroisoquinoline (0.75 mmol, 3 equiv, 96  $\mu$ L) and methyl 1H-indole-5-carboxylate (0.25 mmol, 1.0 equiv, 44 mg) were reacted for 44h. After completion of the reaction, the reaction mixture was

dissolved in methanol and solution mixture was evaporated under reduce pressure and residue was purified by  $SiO_2$  column chromatography (Ethyl acetate: hexane; 1:4) to obtain **5h** as brown solid 104 mg (88%). FTIR (KBr):  $\tilde{\nu}$  = 339, 3058, 2911, 1713, 1445, 1211, 1090, 738  $cm^{-1}$ .  $^1H$  NMR (400 MHz,  $CDCl_3$ )  $\delta$  = 8.66 (s, 1H), 8.44 (s, 1H), 7.87 – 7.85 (m, 1H), 7.73 (d,  $J$  = 7.2 Hz, 1H), 7.67 (d,  $J$  = 7.6 Hz, 1H), 7.60 (d,  $J$  = 7.6 Hz, 1H), 7.51 – 7.48 (m, 2H), 7.34 – 7.29 (m, 3H), 7.22 – 7.18 (m, 2H), 7.07 – 7.05 (m, 2H), 6.96 – 6.90 (m, 2H), 5.94 (s, 1H), 5.02 (s, 1H), 3.92 (s, 3H) 3.17 – 3.09 (m, 1H), 2.60 – 2.54 (m, 2H), 2.43 – 2.39 (m, 1H).  $^{13}C$  NMR (151 MHz,  $CDCl_3$ )  $\delta$  = 168.4, 146.1, 144.6, 141.6, 140.6, 140.0, 138.9, 135.4, 128.9, 127.9, 127.6, 126.6, 126.14, 126.12, 126.07, 125.9, 125.74, 125.72, 125.26, 124.7, 124.0, 121.8, 120.3, 120.2, 119.9, 119.3, 111.1, 65.4, 60.6, 52.1, 43.9, 30.7 ppm. HRMS (ESI) exact mass calculated for  $C_{32}H_{27}N_2O_2^+$  ( $[M+H]^+$ ): 471.2067, found, 471.2060.

**2-(9H-fluoren-9-yl)-1-(5-nitro-1H-indol-3-yl)-1,2,3,4-tetrahydroisoquinoline (5i):** According to

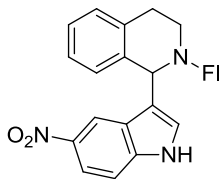

general procedure II: 9-fluorenone imine (0.3 mmol, 1.2 equiv, 54 mg), 1,2,3,4-tetrahydroisoquinoline (0.75 mmol, 3 equiv, 96  $\mu$ L) and 5-nitroindole (0.25 mmol, 1.0 equiv, 40 mg), in neat condition were reacted for 48h. After completion of the reaction, the reaction mixture was

dissolved in methanol and solution mixture was evaporated under reduce pressure and residue was

purified by SiO<sub>2</sub> column chromatography (Ethyl acetate: hexane; 1:2) to obtain **5i** as yellow solid 95 mg (83%). FTIR (KBr):  $\tilde{\nu}$  = 3429, 2923, 1610, 1584, 1489, 1450, 1360, 1258, 1235, 1211, 1149, 743, 728 cm<sup>-1</sup>. <sup>1</sup>H NMR (400 MHz, CDCl<sub>3</sub>)  $\delta$  = 8.79 (s, 1H), 8.45 (s, 1H), 8.10 – 8.07 (m, 1H), 7.72 (d, *J* = 7.2 Hz, 1H), 7.68 (d, *J* = 7.6 Hz, 1H), 7.64 – 7.62 (m, 2H), 7.44 (d, *J* = 7.2 Hz, 1H), 7.39 – 7.36 (m, 1H), 7.35 – 7.30 (m, 2H), 7.24 – 7.19 (m, 2H), 7.14 – 7.08 (m, 2H), 6.99 – 6.95 (m, 1H), 6.88 (d, *J* = 8.0 Hz, 1H), 5.95 (s, 1H), 4.98 (s, 1H), 3.25 – 3.17 (m, 1H), 2.68 – 2.61 (m, 2H), 2.52 – 2.48 (m, 1H). <sup>13</sup>C NMR (101 MHz, CDCl<sub>3</sub>)  $\delta$  = 145.6, 144.3, 141.7, 141.6, 140.6, 140.3, 138.1, 135.4, 129.1, 128.1, 128.0, 127.8, 127.7, 127.5, 126.6, 126.4, 126.0, 125.8, 125.6, 125.5, 121.2, 120.4, 119.5, 119.1, 118.4, 111.4, 65.6, 60.4, 44.1, 30.7 ppm. HRMS (ESI) exact mass calculated for C<sub>30</sub>H<sub>24</sub>N<sub>3</sub>O<sub>2</sub><sup>+</sup> ([M+H]<sup>+</sup>): 458.1863, found, 458.1879.

**2-(9H-fluoren-9-yl)-1-(5-fluoro-1H-indol-3-yl)-1,2,3,4-tetrahydroisoquinoline (5j):** According

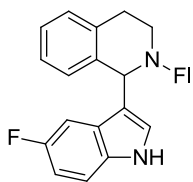

to general procedure I, 9-fluorenone imine (0.3 mmol, 1.2 equiv, 54 mg), 1,2,3,4-tetrahydroisoquinoline (0.75 mmol, 3 equiv, 96  $\mu$ L) and 5-fluoroindole (0.25 mmol, 1.0 equiv, 34 mg) were reacted for 48h. After completion of the reaction, the reaction mixture was dissolved in methanol and solution mixture was evaporated under reduce pressure and residue was purified by SiO<sub>2</sub> column chromatography (Ethyl acetate: hexane; 1:5) to obtain **5j** as yellow solid 80 mg (74%). FTIR (KBr):  $\tilde{\nu}$  = 3432, 2922, 1484, 1448, 1581, 1168, 746, 738 cm<sup>-1</sup>. <sup>1</sup>H NMR (600 MHz, CDCl<sub>3</sub>)  $\delta$  = 8.20 (s, 1H), 7.75 (d, *J* = 7.2 Hz, 1H), 7.69 (d, *J* = 7.8 Hz, 1H), 7.62 (d, *J* = 7.2 Hz, 1H), 7.51 – 7.50 (m, 1H), 7.40 – 7.39 (m, 2H), 7.35 – 7.33 (m, 1H), 7.31 – 7.28 (m, 1H), 7.24 – 7.20 (m, 3H), 7.09 – 7.07 (m, 2H), 6.98 (m, 1H), 6.91 – 6.87 (m, 2H), 5.87 (s, 1H), 5.02 (s, 1H), 3.12 – 3.05 (m, 1H), 2.57 – 2.54 (m, 2H), 2.38 – 2.35 (m, 1H). <sup>13</sup>C NMR (151 MHz, CDCl<sub>3</sub>)  $\delta$  = 158.3, 156.8, 146.2, 144.6, 141.7, 140.6, 138.8, 135.4, 133.9, 128.7, 128.0, 127.9, 127.6, 126.6, 126.5, 126.14, 126.08, 125.8, 125.7, 120.4, 119.3, 118.4, 111.9, 111.86, 111.1, 110.9, 106.5, 106.4, 65.2, 60.8, 43.8, 30.7 ppm. HRMS (ESI) exact mass calculated for C<sub>30</sub>H<sub>24</sub>FN<sub>2</sub><sup>+</sup> ([M+H]<sup>+</sup>): 431.1918, found, 431.1920.

**1-(5-chloro-1H-indol-3-yl)-2-(9H-fluoren-9-yl)-1,2,3,4-tetrahydroisoquinoline (5k):** According to general procedure I, 9-fluorenone imine (0.3 mmol, 1.2 equiv, 54 mg), 1,2,3,4-tetrahydroisoquinoline (0.75 mmol, 3 equiv, 96  $\mu$ L) and 5-chloroindole (0.25 mmol, 1.0 equiv, 38 mg) were reacted for 48h. After completion of the reaction, the reaction mixture was dissolved in methanol and solution mixture was evaporated under reduce pressure and residue was purified by

SiO<sub>2</sub> column chromatography (Ethyl acetate: hexane; 1:5) to obtain **5k** as brown solid 79 mg

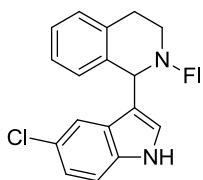

(71%). FTIR (KBr):  $\tilde{\nu}$  = 3441, 2924, 17112, 1609, 1446, 1297, 1261, 1095,

739 cm<sup>-1</sup>. <sup>1</sup>H NMR (400 MHz, CDCl<sub>3</sub>)  $\delta$  = 8.17 (s, 1H), 7.75 – 7.74 (m, 1H),

7.71 (d,  $J$  = 7.2 Hz, 1H), 7.68 (d,  $J$  = 7.6 Hz, 1H), 7.61 (d,  $J$  = 7.6 Hz, 1H), 7.47

– 7.46 (m, 1H), 7.42 (d,  $J$  = 7.2 Hz, 1H), 7.34 – 7.34 (m, 2H), 7.25 – 7.19 (m,

3H), 7.10 – 7.06 (m, 3H), 7.00 – 6.93 (m, 1H), 6.90 – 6.88 (m, 1H), 5.85 (s, 1H), 4.99 (s, 1H),

3.12 – 3.04 (m, 1H), 2.57 – 2.52 (m, 2H), 2.40 – 2.36 (m, 1H). <sup>13</sup>C NMR (101 MHz, CDCl<sub>3</sub>)  $\delta$  =

146.1, 144.6, 141.6, 140.7, 138.8, 135.8, 135.4, 128.8, 127.93, 127.91, 127.7, 127.4, 126.6, 126.14,

126.12, 125.8, 125.7, 125.2, 122.9, 121.1, 120.3, 119.3, 118.2, 112.3, 65.3, 60.7, 43.9, 30.7 ppm.

(Total count of <sup>13</sup>C is less than expected due to the merging of signals in the aromatic region).

HRMS (ESI) exact mass calculated for C<sub>30</sub>H<sub>24</sub>ClN<sub>2</sub><sup>+</sup> ([M+H]<sup>+</sup>): 447.1623, found, 447.1620.

**1-(5-bromo-1H-indol-3-yl)-2-(9H-fluoren-9-yl)-1,2,3,4-tetrahydroisoquinoline (5l):** According

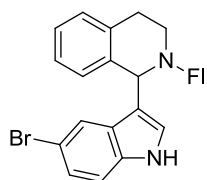

to general procedure I, 9-fluorenone imine (0.3 mmol, 1.2 equiv, 54 mg),

1,2,3,4-tetrahydroisoquinoline (0.75 mmol, 3 equiv, 96  $\mu$ L) and 5-bromoindole

(0.25 mmol, 1.0 equiv, 48.5 mg) were reacted for 48h. After completion of the

reaction, the reaction mixture was dissolved in methanol and solution mixture

was evaporated under reduce pressure and residue was purified by SiO<sub>2</sub> column chromatography

(Ethyl acetate: hexane; 1:5) to obtain **5l** as yellow brown solid 113 mg (92%). FTIR (KBr):  $\tilde{\nu}$  =

3442, 3027, 3058, 2911, 1713, 1445, 1090, 1041, 881, 822, 796, 738 cm<sup>-1</sup>. <sup>1</sup>H NMR (400 MHz,

CDCl<sub>3</sub>)  $\delta$  = 8.08 (s, 1H), 7.95 – 7.94 (m, 1H), 7.73 – 7.68 (m, 2H), 7.63 (d,  $J$  = 7.6 Hz, 1H), 7.48

(d,  $J$  = 2.4 Hz, 1H), 7.45 (d,  $J$  = 7.6 Hz, 1H), 7.35 – 7.29 (m, 2H), 7.27 – 7.25 (m, 1H), 7.24 – 7.22

(m, 2H), 7.20 – 7.17 (m, 1H), 7.09 – 7.08 (m, 2H), 6.98 – 6.94 (m, 1H), 6.91 – 6.89 (m, 1H), 5.87

(s, 1H), 4.99 (s, 1H), 3.13 – 3.05 (m, 1H), 2.58 – 2.51 (m, 2H), 2.41 – 2.37 (m, 1H). <sup>13</sup>C NMR (101

MHz, CDCl<sub>3</sub>)  $\delta$  = 146.1, 144.5, 141.6, 140.7, 138.7, 136.0, 135.3, 128.8, 128.0, 127.94, 127.91,

127.7, 126.6, 126.2, 126.1, 125.9, 125.8, 125.8, 125.7, 125.5, 124.3, 120.3, 119.4, 118.2, 112.9,

112.8, 65.3, 60.7, 43.9, 30.7 ppm. HRMS (ESI) exact mass calculated for C<sub>30</sub>H<sub>24</sub>BrN<sub>2</sub><sup>+</sup> ([M+H]<sup>+</sup>):

493.1097, found, 493.1129.

**1-(5-bromo-1H-indol-3-yl)-2-(9H-fluoren-9-yl)-1,2,3,4-tetrahydroisoquinoline (5m):**

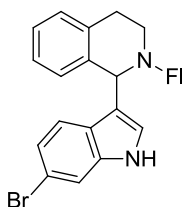

According to general procedure I, 9-fluorenone imine (0.3 mmol, 1.2 equiv, 54 mg), 1,2,3,4-tetrahydroisoquinoline (0.75 mmol, 3 equiv, 96  $\mu$ L) and 6-bromoindole (0.25 mmol, 1.0 equiv, 48.5 mg) were reacted for 48h. After completion of the reaction, the reaction mixture was dissolved in methanol and solution mixture was evaporated under reduce pressure and residue was purified by SiO<sub>2</sub> column chromatography (Ethyl acetate: hexane; 1:5) to obtain **5m** as yellow brown solid 112 mg (91%). FTIR (KBr):  $\tilde{\nu}$  = 3442, 2951, 1713, 1445, 1417, 1211, 1041, 738 cm<sup>-1</sup>. <sup>1</sup>H NMR (400 MHz, CDCl<sub>3</sub>)  $\delta$  = 8.15 (s, 1H), 7.75 (d,  $J$  = 7.2 Hz, 1H), 7.70 (d,  $J$  = 7.2 Hz, 1H), 7.63 – 7.59 (m, 2H), 7.51 – 7.49 (s, 2H), 7.36 – 7.32 (m, 2H), 7.31 – 7.29 (m, 1H), 7.25 – 7.19 (m, 2H), 7.17 – 7.14 (m, 1H), 7.08 – 7.07 (m, 2H), 6.98 – 6.94 (m, 1H), 6.90 – 6.88 (m, 1H), 5.89 (s, 1H), 5.02 (s, 1H), 3.11 – 3.03 (m, 1H), 2.59 – 2.50 (m, 2H), 2.38 – 2.34 (m, 1H). <sup>13</sup>C NMR (151 MHz, CDCl<sub>3</sub>)  $\delta$  = 146.2, 144.6, 141.7, 140.6, 138.9, 138.3, 135.4, 128.7, 128.0, 127.92, 127.91, 127.6, 126.6, 126.12, 126.10, 125.8, 125.7, 125.4, 125.2, 123.0, 122.9, 120.4, 119.3, 118.7, 116.2, 114.3, 65.2, 60.7, 43.8, 30.8 ppm. HRMS (ESI) exact mass calculated for C<sub>30</sub>H<sub>24</sub>BrN<sub>2</sub><sup>+</sup> ([M+H]<sup>+</sup>): 491.1117, found, 491.1121.

**2-(9H-fluoren-9-yl)-1-(1H-pyrrolo[2,3-b]pyridin-3-yl)-1,2,3,4-tetrahydroisoquinoline (5n):**

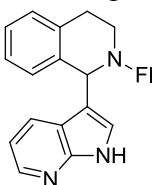

According to general procedure II: 9-fluorenone imine (0.3 mmol, 1.2 equiv, 54 mg), 1,2,3,4-tetrahydroisoquinoline (0.75 mmol, 3 equiv, 96  $\mu$ L) and 7-azaindole (0.25 mmol, 1.0 equiv, 29.5 mg) were reacted for 48h. After completion of the reaction, the reaction mixture was dissolved in methanol and solution mixture was evaporated under reduce pressure and residue was purified by SiO<sub>2</sub> column chromatography (Ethyl acetate: hexane; 1:2) to obtain **5n** as yellow solid 90 mg (82%). FTIR (KBr):  $\tilde{\nu}$  = 2895, 2814, 1582, 1446, 1418, 1120, 773, 741 cm<sup>-1</sup>. <sup>1</sup>H NMR (400 MHz, CDCl<sub>3</sub>)  $\delta$  = 8.20 (dd,  $J$  = 4.8, 1.2 Hz, 1H), 7.93 (dd,  $J$  = 8.0, 1.6 Hz, 1H), 7.68 (d,  $J$  = 7.6 Hz, 1H), 7.62 (d,  $J$  = 8.0 Hz, 1H), 7.56 – 7.54 (m, 2H), 7.39 – 7.21 (m, 3H), 7.19 (s, 1H), 7.13 – 7.11 (m, 2H), 7.02 – 7.01 (m, 2H), 6.97 – 6.94 (m, 1H), 6.92 – 6.87 (m, 1H), 6.85 – 6.83 (m, 1H), 5.81 (s, 1H), 4.97 (s, 1H), 3.05 – 2.96 (m, 1H), 2.56 – 2.49 (m, 2H), 2.35 – 2.31 (m, 1H). <sup>13</sup>C NMR (151 MHz, CDCl<sub>3</sub>)  $\delta$  = 150.0, 146.1, 144.6, 143.4, 141.6, 140.7, 138.8, 135.4, 130.2, 128.7, 128.2, 128.0, 127.9, 127.5, 126.6, 126.2, 126.1, 125.8, 125.5, 125.3, 120.4, 119.4, 119.0, 117.1, 116.0, 65.3, 61.0, 43.9, 30.8 ppm. HRMS (ESI) exact mass calculated for C<sub>29</sub>H<sub>24</sub>N<sub>5</sub><sup>+</sup> ([M+H]<sup>+</sup>): 414.1965, found, 414.1964.

**2-(9H-fluoren-9-yl)-1-(2-methyl-1H-indol-3-yl)-7-nitro-1,2,3,4-tetrahydroisoquinoline (5o):**

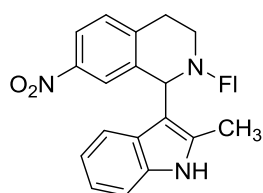

According to general procedure I, 9-fluorenone imine (0.18 mmol, 1.2 equiv, 32 mg), 7-nitro-1,2,3,4-tetrahydroisoquinoline (0.23 mmol, 1.5 equiv, 32 mg) and 2-methylindole (0.15 mmol, 1.0 equiv, 20 mg) were reacted for 48h. After completion of the reaction, the reaction mixture was dissolved in methanol and solution mixture was evaporated under reduce pressure and residue was purified by SiO<sub>2</sub> column chromatography (Ethyl acetate: hexane; 1:15) to obtain **5b** as brown solid (71 %, 51 mg). FTIR (KBr):  $\tilde{\nu}$  = 3411, 2957, 2924, 2853, 1518, 1304, 740 cm<sup>-1</sup>. FTIR (KBr):  $\tilde{\nu}$  = 3411, 2957, 2924, 2853, 1518, 1304, 740 cm<sup>-1</sup>. <sup>1</sup>H NMR (400 MHz, CDCl<sub>3</sub>)  $\delta$  = 7.90 (s, 1H), 7.82 – 7.79 (m, 1H), 7.71 – 7.69 (m, 1H), 7.63 – 7.61 (m, 2H), 7.57 (d, *J* = 7.6 Hz, 1H), 7.53 (d, *J* = 7.2 Hz, 1H), 7.29 – 7.27 (m, 2H), 7.22 – 7.15 (m, 3H), 7.12 – 7.08 (m, 2H), 7.04 – 7.02 (m, 1H), 6.97 – 6.93 (m, 1H), 5.88 (s, 1H), 4.93 (s, 1H), 3.07 – 3.01 (m, 1H), 2.59 (s, 3H), 2.54 – 2.47 (m, 2H), 2.31 – 2.27 (m, 1H). <sup>13</sup>C NMR (101 MHz, CDCl<sub>3</sub>)  $\delta$  = 146.6, 146.0, 144.3, 143.5, 141.7, 141.5, 140.6, 136.1, 134.4, 129.6, 128.1, 128.0, 127.6, 126.7, 126.0, 125.8, 123.5, 121.9, 121.0, 120.5, 119.7, 119.4, 112.4, 110.7, 65.2, 59.5, 43.4, 31.2, 12.7 ppm. (Total count of <sup>13</sup>C is less than expected due to the merging of signals in the aromatic region). HRMS (ESI) exact mass calculated for C<sub>31</sub>H<sub>26</sub>N<sub>3</sub>O<sub>2</sub><sup>+</sup> ([M+H]<sup>+</sup>): 472.2020, found, 472.2034.

**2-(9H-fluoren-9-yl)-6,7-dimethoxy-1-(2-methyl-1H-indol-3-yl)-1,2,3,4-tetrahydroisoquinoline (5p):**

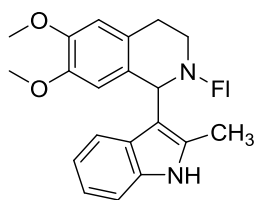

According to general procedure I, 9-fluorenone imine (0.18 mmol, 1.2 equiv, 32 mg), 6,7-dimethoxy-1,2,3,4-tetrahydroisoquinoline (0.23 mmol, 1.5 equiv, 43 mg) and 2-methylindole (0.15 mmol, 1.0 equiv, 20 mg) were reacted for 48h. After completion of the reaction, the reaction mixture was dissolved in methanol and solution mixture was evaporated under reduce pressure and residue was purified by SiO<sub>2</sub> column chromatography (Ethyl acetate: hexane; 1:5) to obtain **5b** as light yellow solid (73 %, 53 mg). FTIR (KBr):  $\tilde{\nu}$  = 3348, 3296, 2923, 2851, 2807, 1506, 1460, 1445, 1253, 1133, 1025, 734 cm<sup>-1</sup>. <sup>1</sup>H NMR (400 MHz, CDCl<sub>3</sub>)  $\delta$  = 7.81 (s, 1H), 7.77 (d, *J* = 7.6 Hz, 1H), 7.70 (d, *J* = 7.6 Hz, 1H), 7.62 (d, *J* = 7.2 Hz, 1H), 7.53 (d, *J* = 7.6 Hz, 1H), 7.31 – 7.25 (m, 2H), 7.20 – 7.18 (m, 2H), 7.17 – 7.15 (m, 1H), 7.12 – 7.10 (m, 1H), 7.03 – 6.96 (m, 2H), 6.48 (s, 1H), 6.27 (s, 1H), 5.88 (s, 1H), 4.93 (s, 1H), 3.74 (s, 3H), 3.47 (s, 3H), 2.99 – 2.89 (m, 1H), 2.53 (s, 3H), 2.49 – 2.48 (m, 1H), 2.41 – 2.37 (m, 1H), 2.24 – 2.21 (m, 1H). <sup>13</sup>C NMR (101 MHz, CDCl<sub>3</sub>)  $\delta$  = 147.4, 147.3, 146.7, 144.9, 141.7, 140.5, 135.9, 133.8, 131.6,

127.8, 127.8, 127.7, 127.5, 126.5, 126.0, 125.9, 121.4, 120.3, 119.5, 119.2, 113.9, 111.3, 111.1, 110.3, 65.5, 58.9, 56.1, 56.0, 44.2, 30.5, 12.7 ppm (Total count of  $^{13}\text{C}$  is less than expected due to the merging of signals in the aromatic region). HRMS (ESI) exact mass calculated for  $\text{C}_{33}\text{H}_{31}\text{N}_2\text{O}_2^+$  ( $[\text{M}+\text{H}]^+$ ): 487.2380, found, 487.2386.

**2-(9H-fluoren-9-yl)-1-(1H-pyrrol-3-yl)-1,2,3,4-tetrahydroisoquinoline (5q):** According to

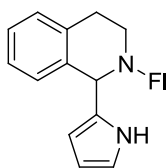

general procedure I, 9-fluorenone imine (0.3 mmol, 1.2 equiv, 54 mg), 1,2,3,4-tetrahydroisoquinoline (0.75 mmol, 3 equiv, 96  $\mu\text{L}$ ) and pyrrole (0.25 mmol, 1.0 equiv, 18  $\mu\text{L}$ ), in neat condition were reacted for 24h. After completion of the reaction, the reaction mixture was dissolved in methanol and solution mixture was evaporated under reduce pressure and residue was purified by  $\text{SiO}_2$  column chromatography (Ethyl acetate: hexane; 1:20) to obtain **5o** as yellow solid 48 mg (53%). FTIR (KBr):  $\tilde{\nu}$  = 3398, 3060, 1713, 1428, 1287, 1110, 772, 748  $\text{cm}^{-1}$ .  $^1\text{H}$  NMR (400 MHz,  $\text{CDCl}_3$ )  $\delta$  = 8.39 (s, 1H), 7.77 – 7.70 (m, 2H), 7.69 – 7.65 (m, 1H), 7.46 – 7.44 (m, 1H), 7.35 – 7.33 (m, 2H), 7.29 – 7.28 (m, 1H), 7.24 – 7.23 (m, 1H), 7.13 – 7.03 (m, 3H), 6.98 – 6.96 (m, 1H), 6.80 (s, 1H), 6.56 (s, 1H), 6.18 (s, 1H), 5.75 (s, 1H), 4.96 (s, 1H), 2.94 – 2.85 (m, 1H), 2.51 – 2.45 (m, 2H), 2.32 – 2.28 (m, 1H).  $^{13}\text{C}$  NMR (101 MHz,  $\text{CDCl}_3$ )  $\delta$  = 145.8, 144.2, 141.6, 140.9, 137.9, 135.2, 132.4, 128.8, 128.4, 128.1, 128.0, 127.5, 126.8, 126.5, 126.4, 126.0, 125.0, 120.4, 119.6, 118.6, 110.5, 107.7, 65.3, 61.2, 43.3, 30.3 ppm. HRMS (ESI) exact mass calculated for  $\text{C}_{26}\text{H}_{23}\text{N}_2^+$  ( $[\text{M}+\text{H}]^+$ ): 363.1856, found, 363.1857.

**1-(2-(9H-fluoren-9-yl)-1,2,3,4-tetrahydroisoquinolin-1-yl)-6-phenylnaphthalen-2-ol (9):**

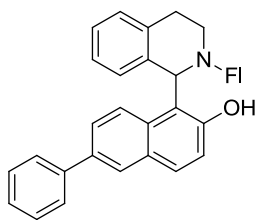

Phenyl boronic acid (0.26 mmol, 1.5 equiv, 31 mg),  $\text{Ba}(\text{OH})_2 \cdot 8\text{H}_2\text{O}$  (0.23 mmol, 1.2 equiv, 40mg)  $\text{Pd}(\text{PPh}_3)_4$  (0.01 mmol, 0.019 equiv, 11 mg), 1,4 dioxane (1.3 mL),  $\text{H}_2\text{O}$  (0.4 mL) and 1-(2-(9H-fluoren-9-yl)-1,2,3,4-tetrahydroisoquinolin-1-yl)-6-bromonaphthalen-2-ol, **4c** (0.193 mmol, 1equiv, 100 mg) were refluxed for 24 h under inert atmosphere. After completion of the reaction 1,4 dioxane was evaporated under reduce pressure. The resulting mass was diluted with DCM (30 mL) and the mixture was washed with 1M HCl (3 $\times$ 20 mL) and then with brine (2 $\times$ 20 mL). Combined organic layers were dried over sodium sulfate and concentrated under vacuum to give crude product which was further was purified by  $\text{SiO}_2$  column chromatography (ethyl acetate: hexane; 1:2) to afford desired product **9** as light yellow solid 82

mg (82%). FTIR (KBr):  $\tilde{\nu}$  = 2959, 2924, 1493, 1448, 1261, 1079, 812, 739  $\text{cm}^{-1}$ .  $^1\text{H}$  NMR (600 MHz,  $\text{CDCl}_3$ )  $\delta$  = 11.78 (s, 1H), 8.45 (d,  $J$  = 8.4 Hz, 1H), 8.07 (d,  $J$  = 1.2 Hz, 1H), 7.97 – 7.95 (m, 1H), 7.86 – 7.83 (m, 3H), 7.77 – 7.76 (m, 2H), 7.68 (d,  $J$  = 7.8 Hz, 1H), 7.64 (d,  $J$  = 6.6 Hz, 1H), 7.51 – 7.48 (m, 2H), 7.40 – 7.35 (m, 4H), 7.29 – 7.27 (m, 1H), 7.23 (s, 1H), 7.11 – 7.09 (m, 1H), 7.06 (d,  $J$  = 7.2 Hz, 1H), 6.95 – 6.94 (m, 1H), 6.86 (d,  $J$  = 7.8 Hz, 1H), 6.68 (s, 1H), 5.03 (s, 1H), 3.10 – 3.05 (m, 1H), 2.65 – 2.62 (m, 1H), 2.59 – 2.55 (m, 1H), 2.49 – 2.47 (m, 1H).  $^{13}\text{C}$  NMR (151 MHz,  $\text{CDCl}_3$ )  $\delta$  = 155.9, 143.9, 142.1, 141.5, 141.1, 141.0, 136.5, 135.7, 134.3, 133.6, 130.6, 129.3, 129.1, 128.8, 128.7, 128.6, 128.3, 127.9, 127.37, 127.36, 127.29, 127.27, 127.18, 126.9, 126.6, 126.4, 125.9, 122.1, 120.60, 120.59, 119.7, 118.0, 65.3, 60.8, 43.2, 29.9 ppm. HRMS (ESI) exact mass calculated for  $\text{C}_{38}\text{H}_{30}\text{NO}^+$  ( $[\text{M}+\text{H}]^+$ ): 516.2322, found, 516.2322.

**1-(2-methyl-1H-indol-3-yl)-1,2,3,4-tetrahydroisoquinoline (10):** 2-(9H-fluoren-9-yl)-1-(1H-

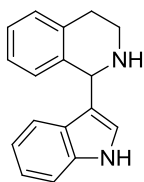

indol-3-yl)-1,2,3,4-tetrahydroisoquinoline, (**5a**) (0.18 mmol, 1 equiv, 75 mg) was dissolved in ethyl acetate and methanol (3:1, v/v). Palladium (10%) on charcoal (0.18 mmol, 1 equiv, 20 mg) was added to it. Then the flask was evacuated and re-filled with hydrogen. The process was repeated three times. Then, the reaction

mixture was kept on shaking at 25 PSI of hydrogen for 48 h. After the completion of the reaction, the reaction mixture was filtered through a pad of celite, and the celite pad was washed successively with methanol (3×5 mL) and of ethyl acetate (3×5 mL). The filtrate was concentrated and the crude product was purified (preparative TLC, ethyl acetate: hexane; 2:1) to afford desired product **10** as brown gum 25 mg (55%). FTIR (KBr):  $\tilde{\nu}$  = 2923, 2855, 1622, 1452, 1263, 1099, 742  $\text{cm}^{-1}$ .  $^1\text{H}$  NMR (600 MHz,  $\text{CDCl}_3$ )  $\delta$  = 8.19 (s, 1H), 7.47 (d,  $J$  = 7.8 Hz, 1H), 7.35 (d,  $J$  = 7.8 Hz, 1H), 7.20 – 7.13 (m, 2H), 7.07 – 7.05 (m, 1H), 7.04 – 7.01 (m, 1H), 6.98 (d,  $J$  = 7.8 Hz, 1H), 6.93 – 6.92 (m, 1H), 5.51 (s, 1H), 3.29 – 3.25 (m, 1H), 3.12 – 3.08 (m, 1H), 3.03 – 2.98 (m, 1H), 2.92 – 2.88 (m, 1H).  $^{13}\text{C}$  NMR (151 MHz,  $\text{CDCl}_3$ )  $\delta$  = 138.1, 136.7, 135.1, 129.1, 128.1, 126.5, 125.9, 124.3, 122.3, 119.9, 119.6, 119.2, 111.5, 53.9, 41.8, 29.7 ppm. HRMS (ESI) exact mass calculated for  $\text{C}_{17}\text{H}_{17}\text{N}_2^+$  ( $[\text{M}+\text{H}]^+$ ): 249.1386, found, 249.1387.

**1-(2-methyl-1H-indol-3-yl)-1,2,3,4-tetrahydroisoquinoline (11):** 2-(9H-fluoren-9-yl)-1-(2-

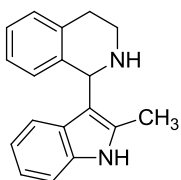

methyl-1H-indol-3-yl)-1,2,3,4-tetrahydroisoquinoline (**5b**) (0.23 mmol, 1 equiv, 100 mg) was dissolved in ethyl acetate and methanol (3:1, v/v). Palladium (10%) on charcoal (0.23 mmol, 1 equiv, 25 mg) was added to it.

Then the flask was evacuated and re-filled with hydrogen. The process was repeated three times. Then, the reaction mixture was kept on shaking at 25 PSI of hydrogen for 48 hours. After the completion of the reaction, the reaction mixture was filtered through a pad of celite, and the celite pad was washed successively with methanol (3×5 mL) and of ethyl acetate (3×5 mL). The filtrate was concentrated and the crude product was purified (preparative TLC, ethyl acetate: hexane; 2:1) to afford desired product **11** as brown gum 35 mg (57%). FTIR (KBr):  $\tilde{\nu}$  = 3604, 3298, 3228, 2922, 1622, 1460, 1428, 1261, 738  $\text{cm}^{-1}$ .  $^1\text{H}$  NMR (600 MHz,  $\text{CDCl}_3$ )  $\delta$  = 7.97 (s, 1H), 7.25 – 7.23 (m, 1H), 7.17 – 7.16 (m, 1H), 7.13 – 7.09 (m, 2H), 7.06 – 7.03 (m, 1H), 6.99 – 6.96 (m, 1H), 6.93 – 6.89 (m, 1H), 6.84 (d,  $J$  = 7.8 Hz, 1H), 5.42 (s, 1H), 3.40 – 3.37 (m, 1H), 3.20 – 3.11 (m, 2H), 2.88 – 2.85 (m, 1H), 2.34 (s, 3H).  $^{13}\text{C}$  NMR (101 MHz,  $\text{CDCl}_3$ )  $\delta$  = 139.0, 135.5, 135.3, 133.2, 129.0, 127.6, 126.2, 126.1, 121.1, 119.5, 119.2, 114.4, 110.4, 53.9, 43.8, 30.3, 12.3 ppm (Total count of  $^{13}\text{C}$  is less than expected due to the merging of signals in the aromatic region). HRMS (ESI) exact mass calculated for  $\text{C}_{18}\text{H}_{19}\text{N}_2^+$  ( $[\text{M}+\text{H}]^+$ ): 263.1543, found, 263.1543.

**1-(isoquinolin-1-yl)naphthalen-2-ol(12):** 1-(2-(9H-fluoren-9-yl)-1,2,3,4 tetrahydroisoquinolin-

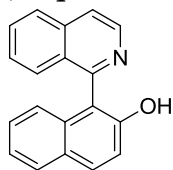

1-yl)naphthalen-2-ol, (**3**) (0.17 mmol, 1 equiv, 75 mg) was dissolved in 3 mL mesitylene. Palladium (10%) on charcoal (0.34 mmol, 2 equiv, 36 mg) was added to it. Then, the reaction mixture was placed and refluxed for 24 h. After the

completion of the reaction, the reaction mixture was filtered through a pad of celite, and the celite pad was washed successively with methanol (3×5 mL) and of ethyl acetate (3×5 mL). The filtrate was concentrated and the crude product was purified  $\text{SiO}_2$  column chromatography (ethyl acetate: hexane; 1:2) to afford desired product **12** as brown solid 44 mg (96%). FTIR (KBr):  $\tilde{\nu}$  = 3050, 1620, 1582, 1558, 1434, 1350, 1276, 823, 747  $\text{cm}^{-1}$ .  $^1\text{H}$  NMR (400 MHz,  $\text{CDCl}_3$ )  $\delta$  = 8.59 (d,  $J$  = 5.6 Hz, 1H), 7.93 (d,  $J$  = 8.0 Hz, 1H), 7.84 – 7.82 (m, 1H), 7.78 – 7.76 (m, 2H), 7.71 – 7.69 (m, 1H), 7.59 (d,  $J$  = 8.4 Hz, 1H), 7.42 – 7.38 (m, 1H), 7.33 – 7.29 (m, 1H), 7.21 – 7.18 (m, 2H), 7.08 (d,  $J$  = 8.8 Hz, 1H).  $^{13}\text{C}$  NMR (151 MHz,  $\text{CDCl}_3$ )  $\delta$  = 157.6, 153.6, 141.8, 137.3, 133.3, 131.2, 131.0, 129.0, 128.4, 128.4, 128.0, 127.7, 127.3, 126.6, 125.1, 123.4, 121.1, 119.4, 117.5 ppm. HRMS (ESI) exact mass calculated for  $\text{C}_{19}\text{H}_{14}\text{NO}^+$  ( $[\text{M}+\text{H}]^+$ ): 272.1070, found, 272.1097.

***1-(isoquinolin-1-yl)-7-methoxynaphthalen-2-ol* (13):** 1-(2-(9H-fluoren-9-yl)-1,2,3,4-

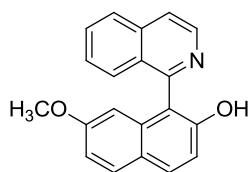

tetrahydroisoquinolin-1-yl)-7-methoxynaphthalen-2-ol, (**4a**) (0.16 mmol, 1 equiv, 75 mg) was dissolved in 3 mL mesitylene. Palladium (10%) on charcoal (0.32 mmol, 2 equiv, 34 mg) was added to it. Then, the reaction mixture was placed and refluxed for 24 h. After the completion of the reaction, the reaction

mixture was filtered through a pad of celite, and the celite pad was washed successively with methanol (3×5 mL) and of ethyl acetate (3×5 mL). The filtrate was concentrated and the crude product was purified SiO<sub>2</sub> column chromatography (ethyl acetate: hexane; 1:2) to afford desired product **13** as brown solid 41 mg (84%). FTIR (KBr):  $\tilde{\nu}$  = 2952, 1623, 1588, 1348, 1223, 827 cm<sup>-1</sup>. <sup>1</sup>H NMR (600 MHz, CDCl<sub>3</sub>)  $\delta$  = 8.67 (d,  $J$  = 6.0 Hz, 1H), 7.93 (d,  $J$  = 8.4 Hz, 1H), 7.79 – 7.77 (m, 2H), 7.74 – 7.70 (m, 2H), 7.66 (d,  $J$  = 8.4 Hz, 1H), 7.44 – 7.41 (m, 1H), 7.17 (d,  $J$  = 9.0 Hz, 1H), 6.98 (dd,  $J$  = 9.0, 3.6 Hz, 1H), 6.44 (d,  $J$  = 2.4 Hz, 1H), 3.42 (s, 3H). <sup>13</sup>C NMR (151 MHz, CDCl<sub>3</sub>)  $\delta$  = 158.3, 157.7, 154.4, 141.9, 137.3, 134.4, 131.0, 131.0, 129.9, 128.6, 128.0, 127.5, 127.3, 124.4, 121.0, 116.8, 116.7, 115.5, 104.6, 55.1 ppm. HRMS (ESI) exact mass calculated for C<sub>20</sub>H<sub>16</sub>NO<sub>2</sub><sup>+</sup> ([M+H]<sup>+</sup>): 302.1176, found, 302.1179.

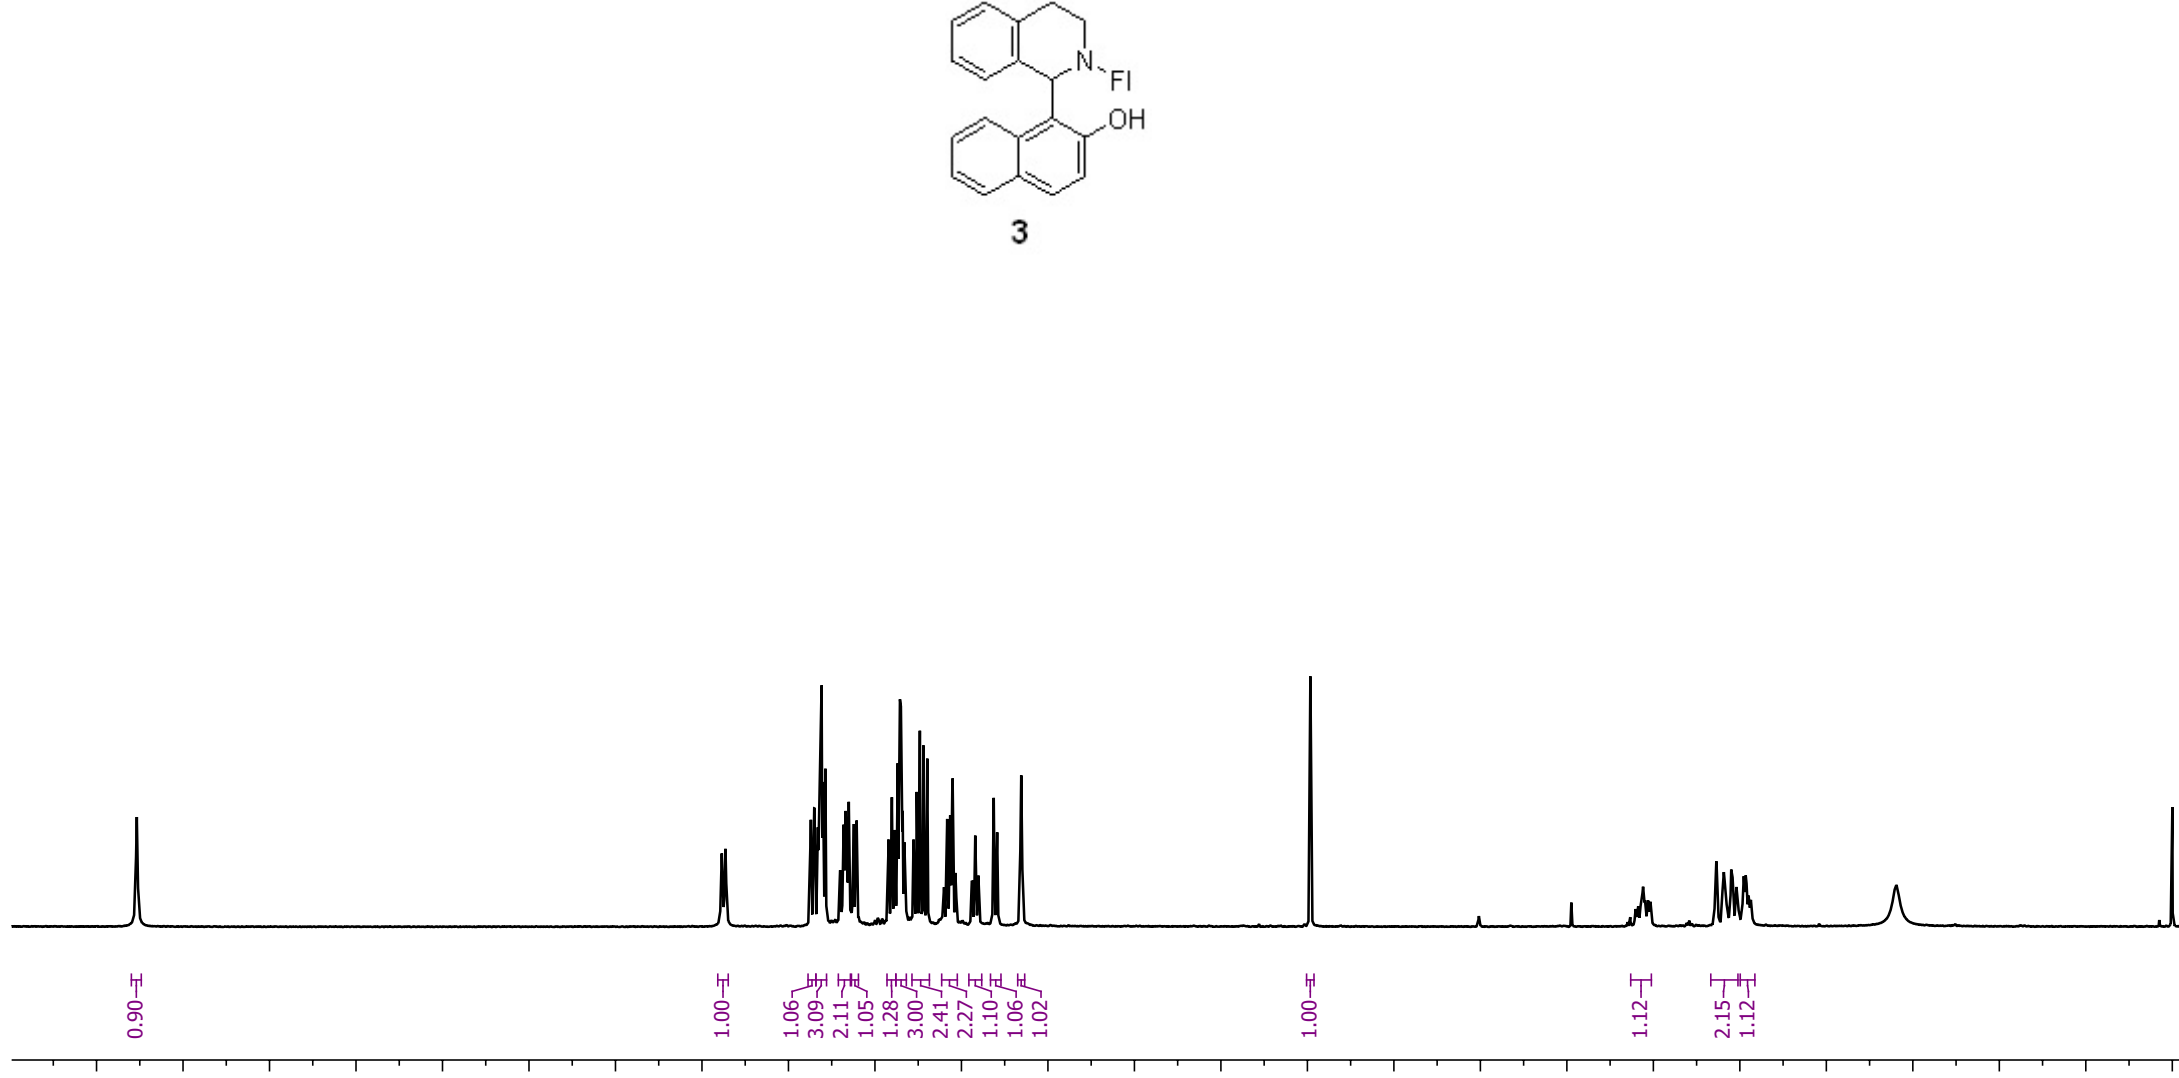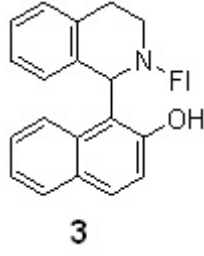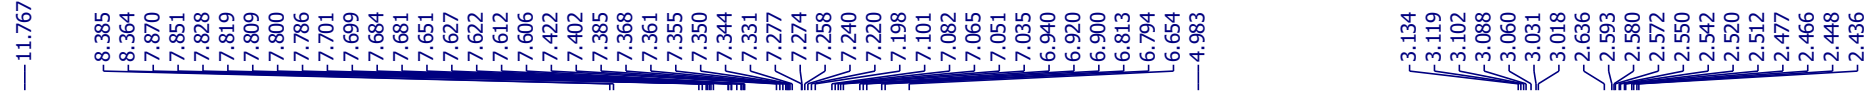

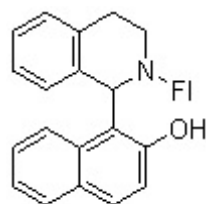

3

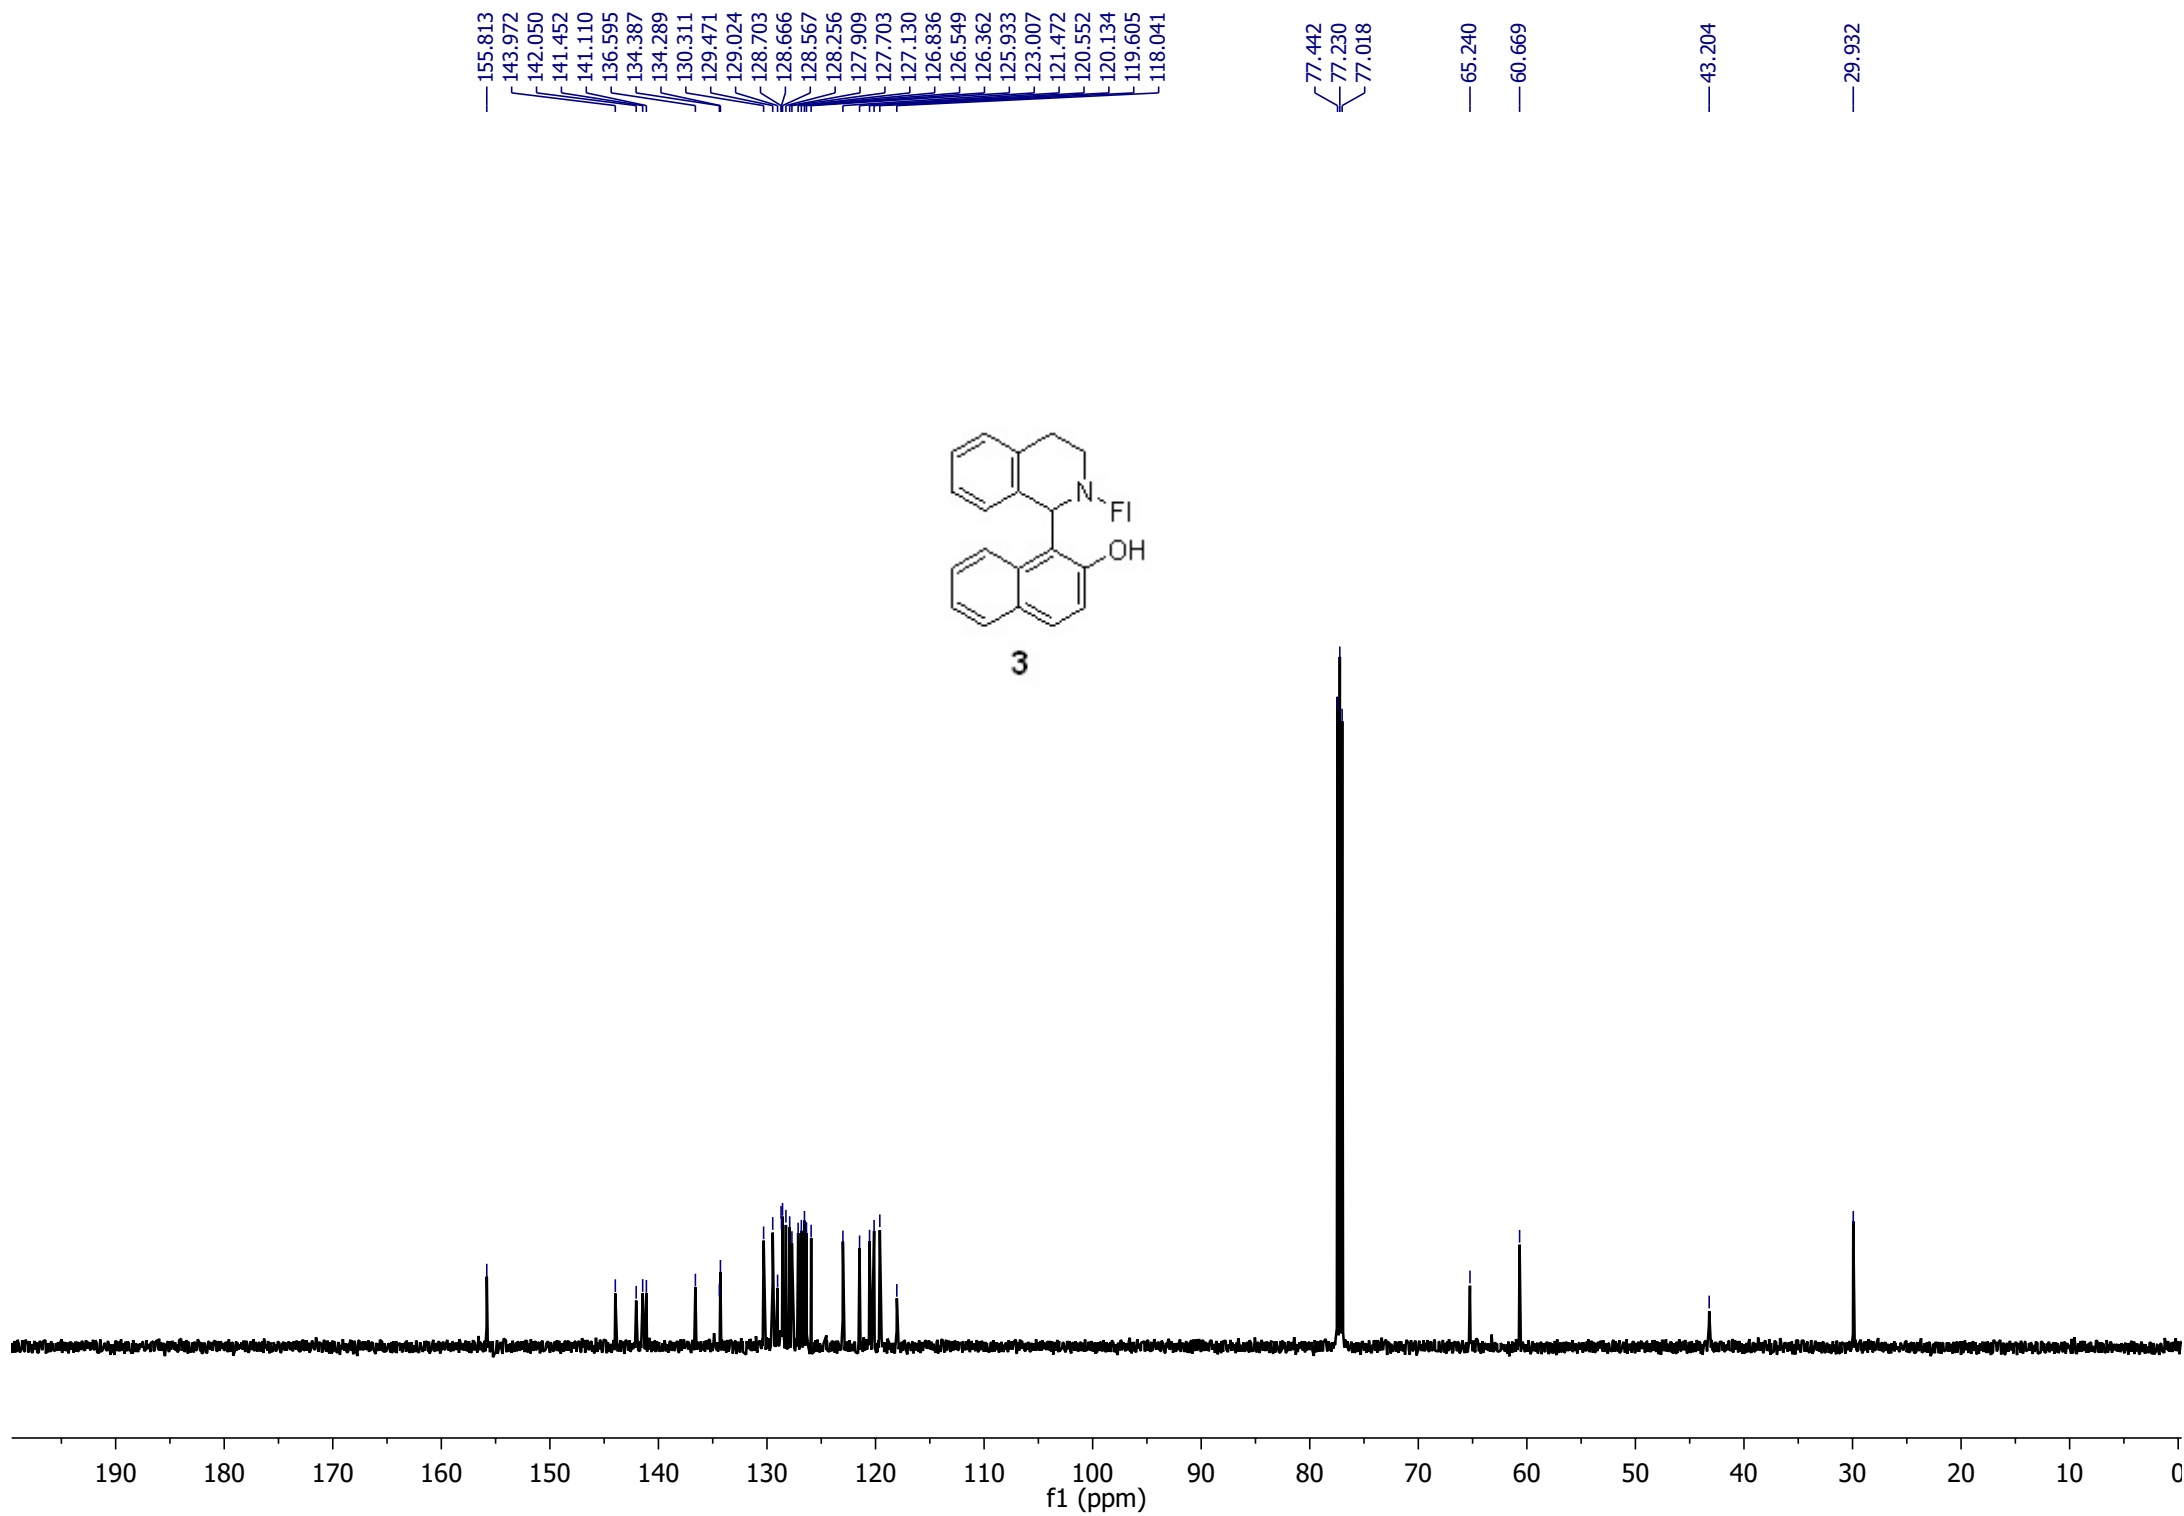

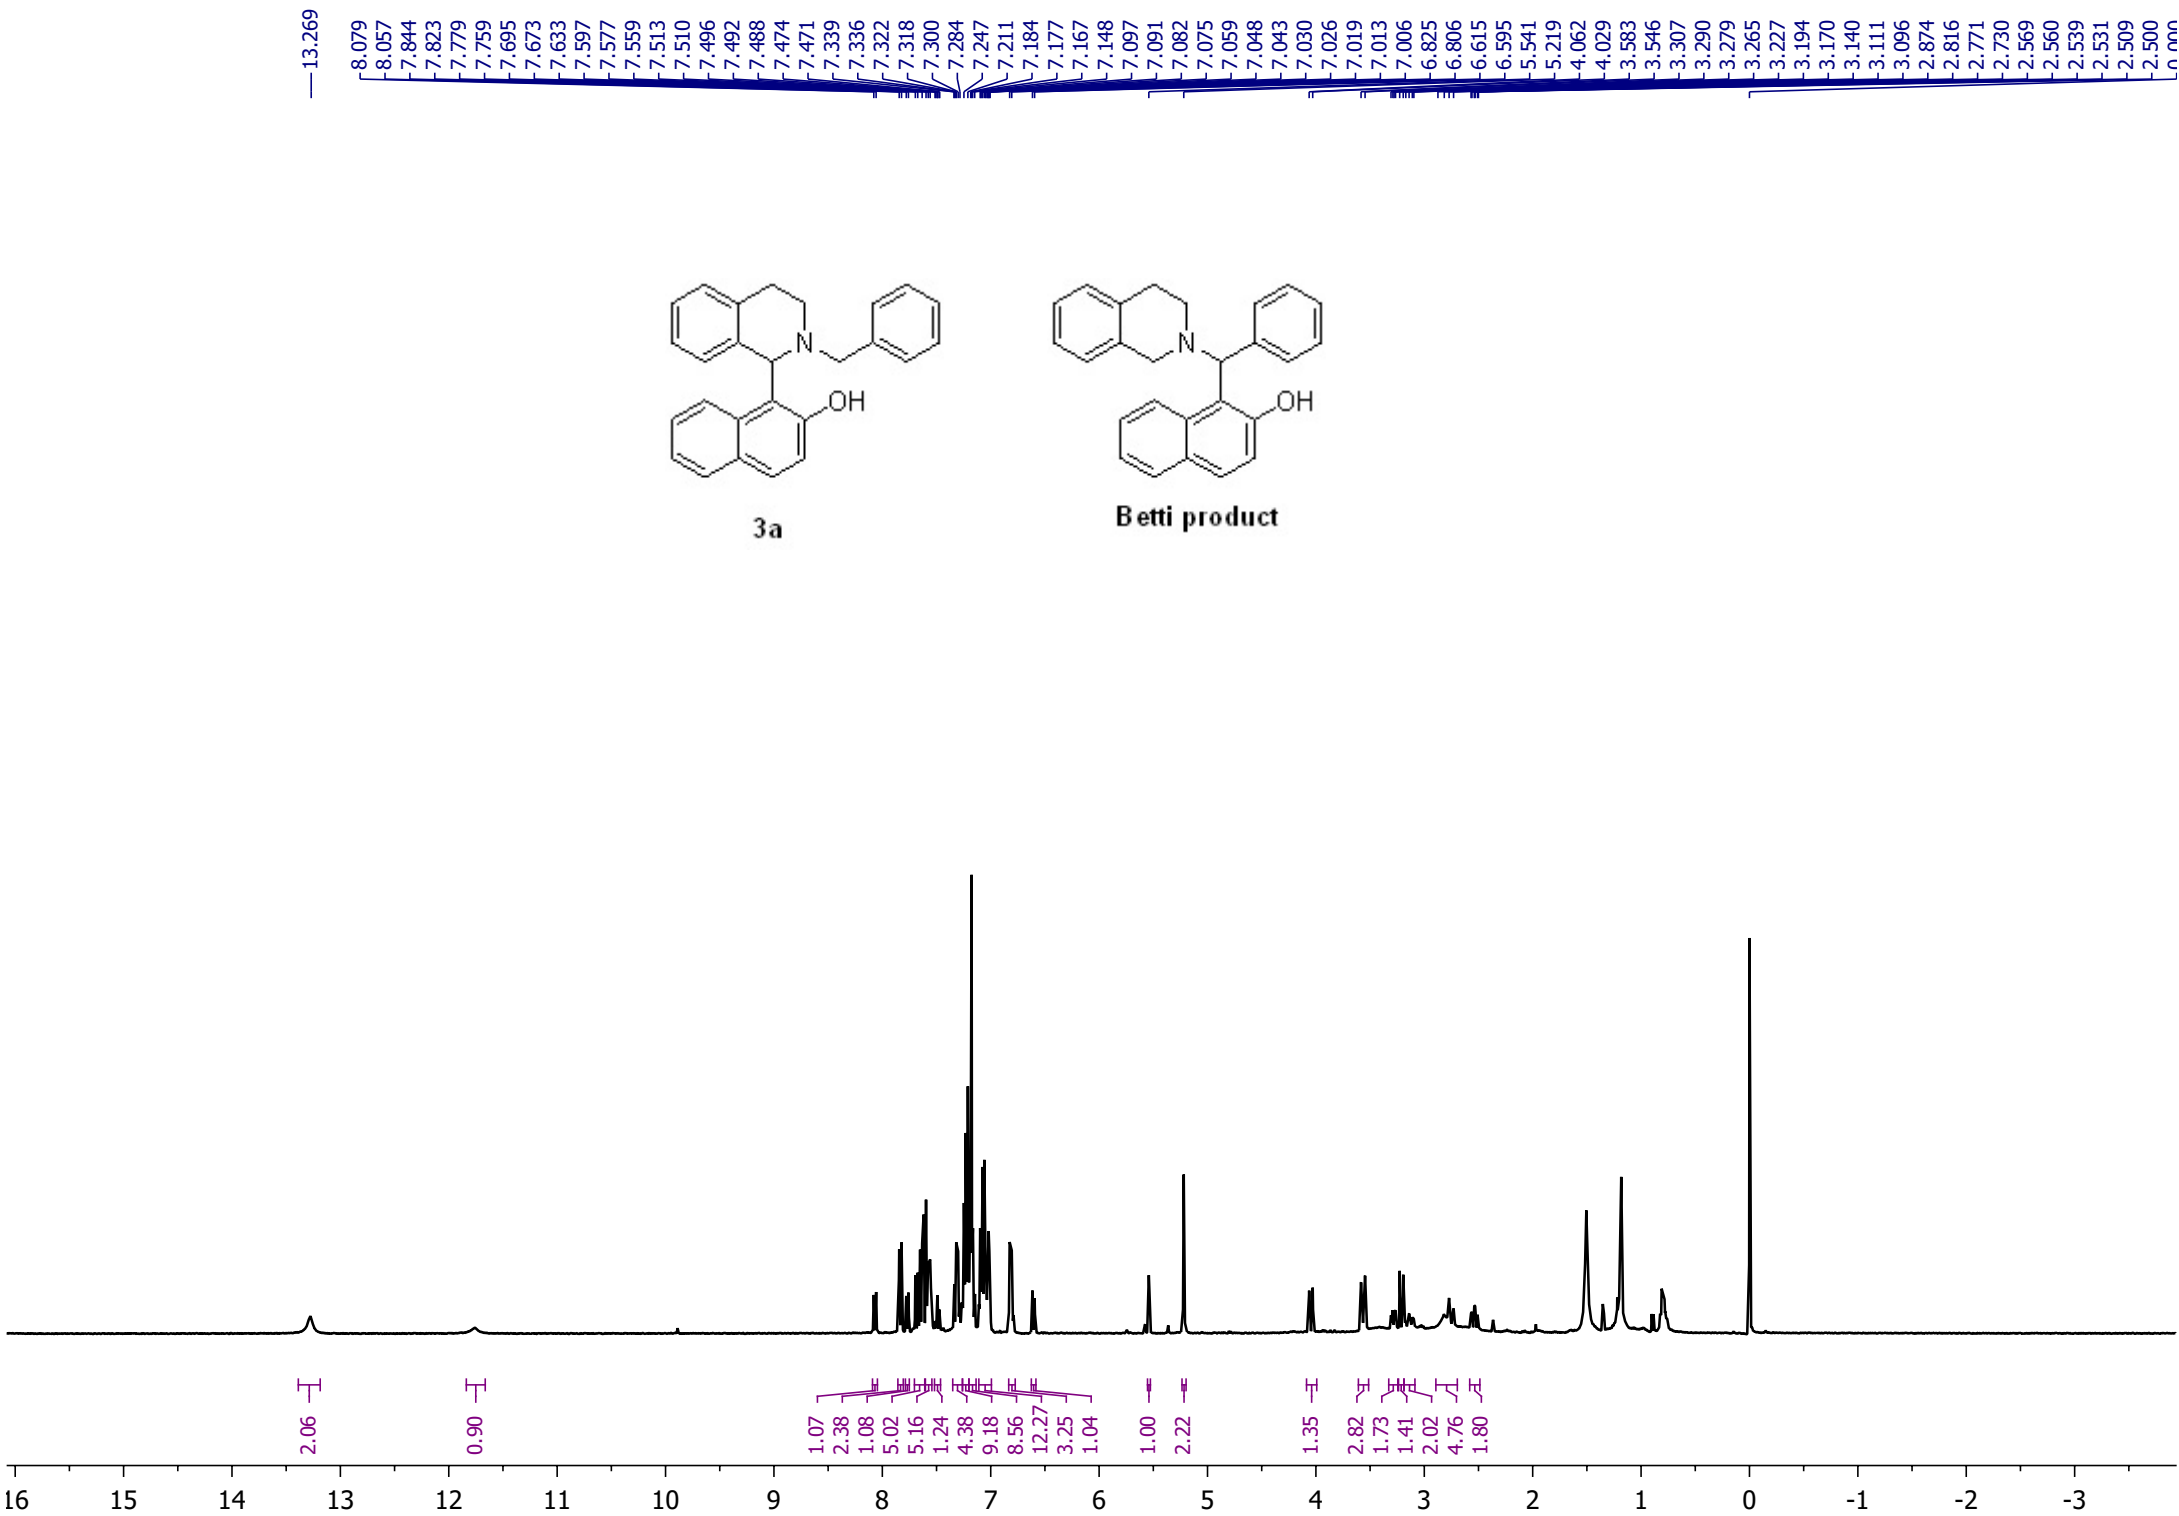

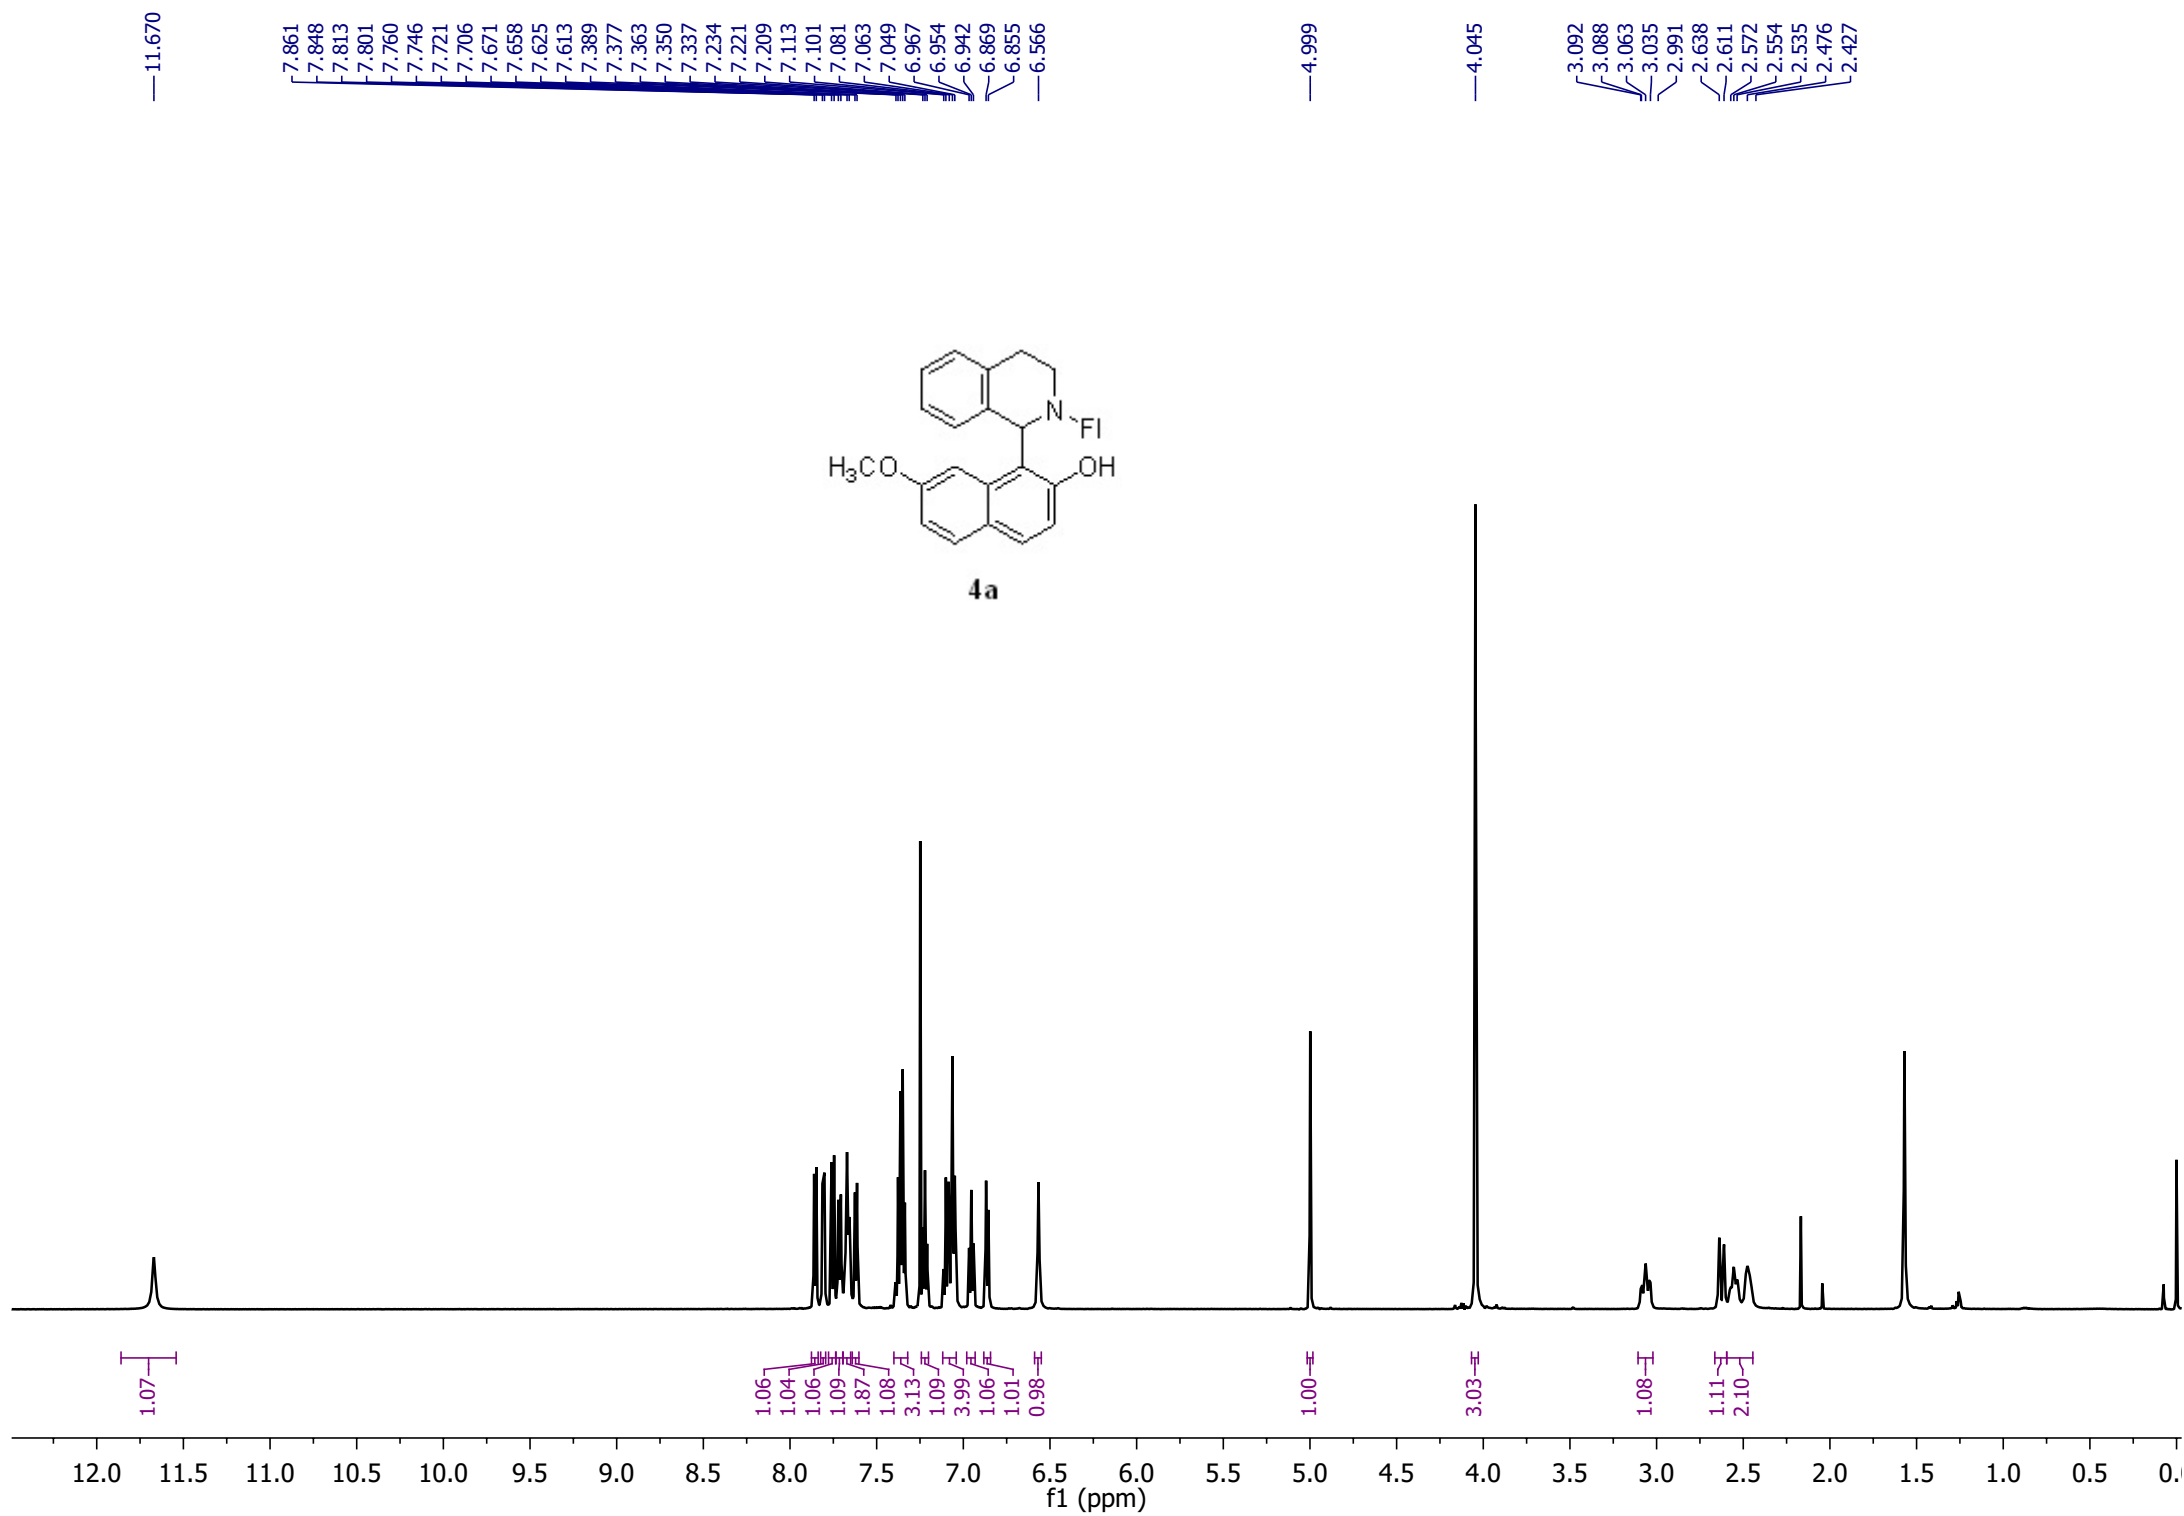

159.446  
156.443  
143.985  
142.145  
141.517  
141.078  
136.666  
135.581  
134.309  
130.998  
130.084  
128.715  
128.671  
128.610  
128.281  
127.818  
126.885  
126.873  
126.648  
126.302  
125.923  
124.433  
120.638  
119.630  
117.562  
117.300  
115.056

100.927

77.441  
77.230  
77.018

65.235

60.893

55.612

43.211

29.916

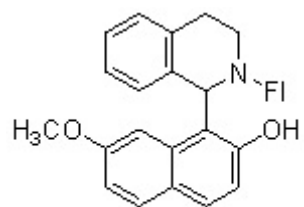

4a

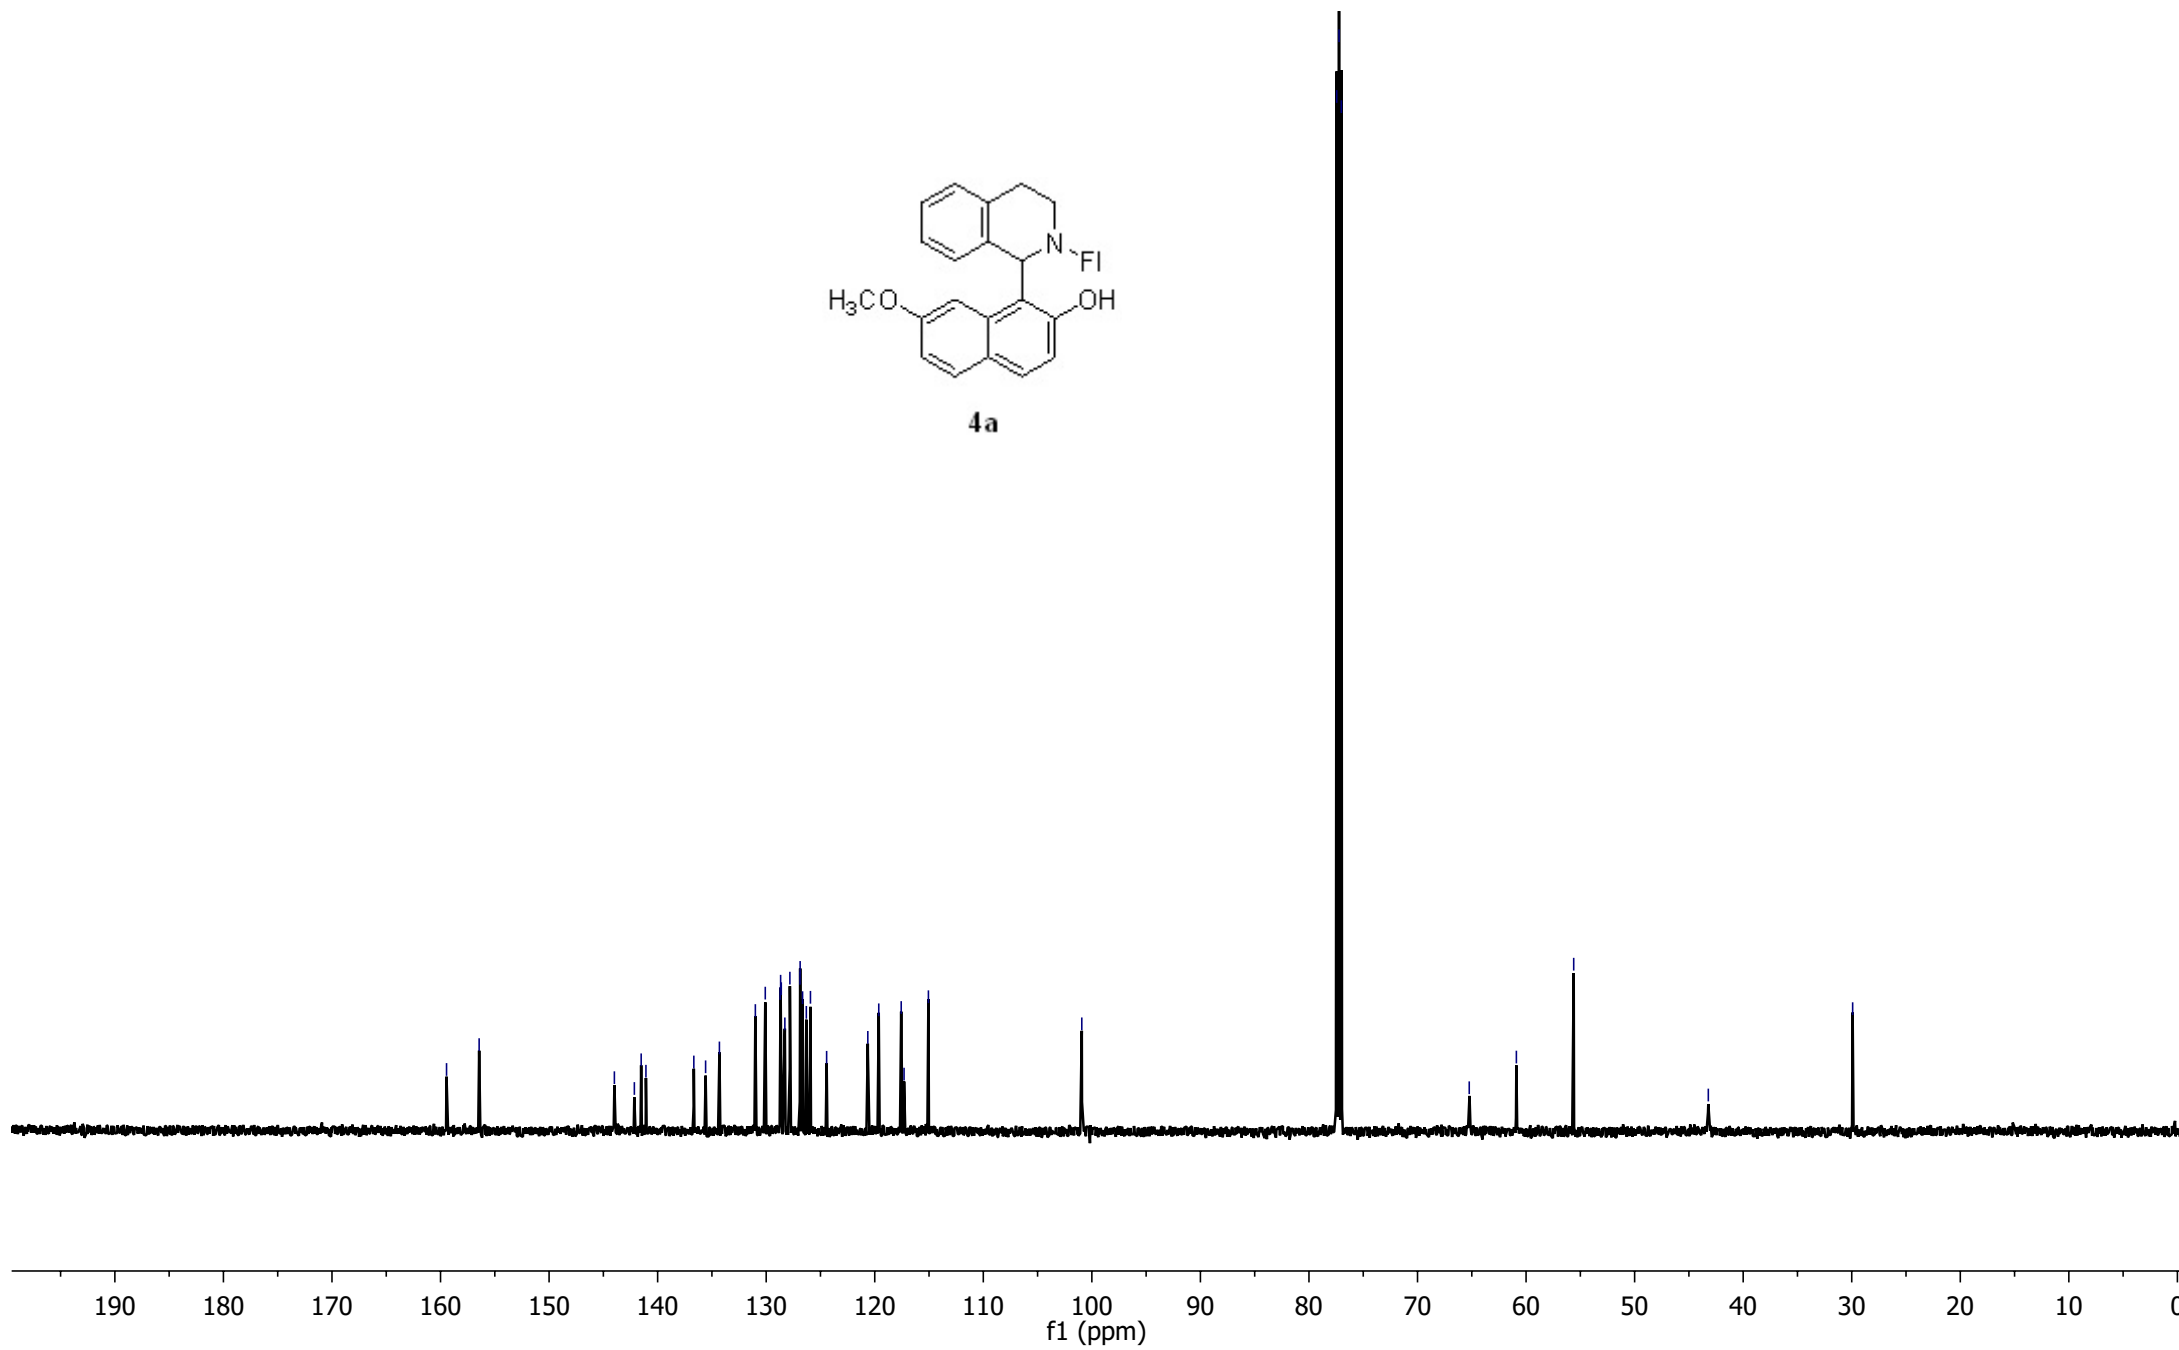

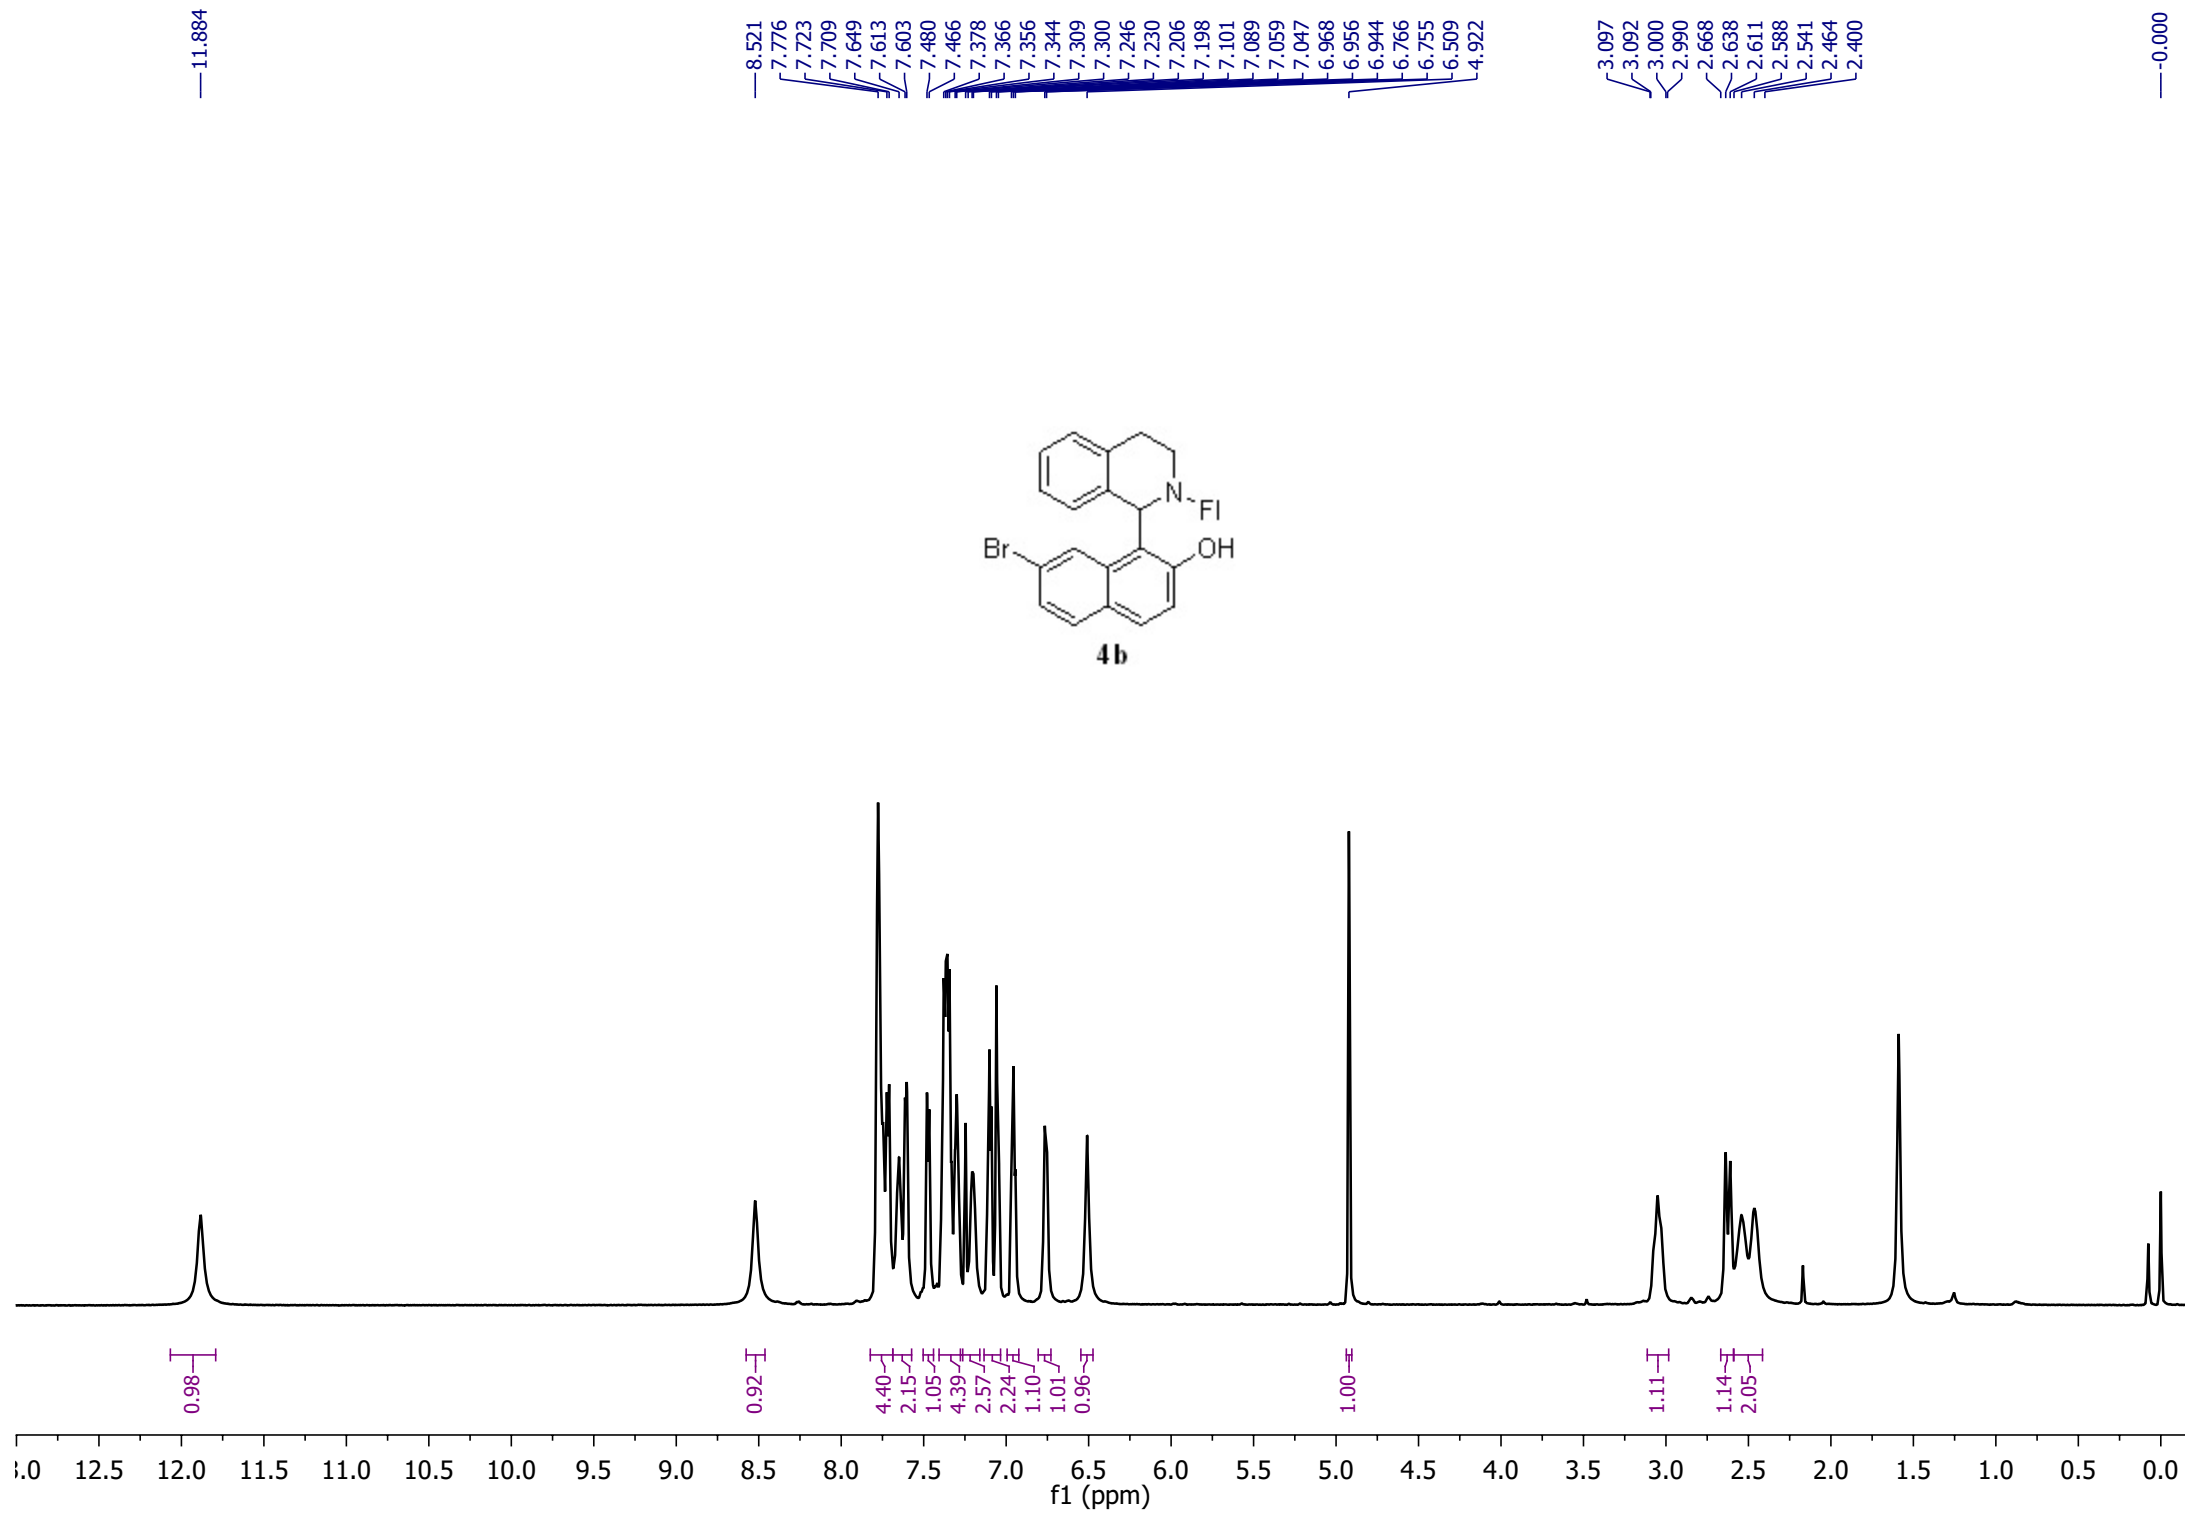

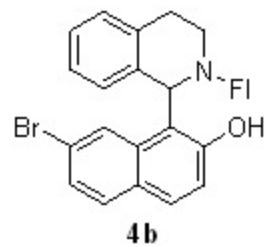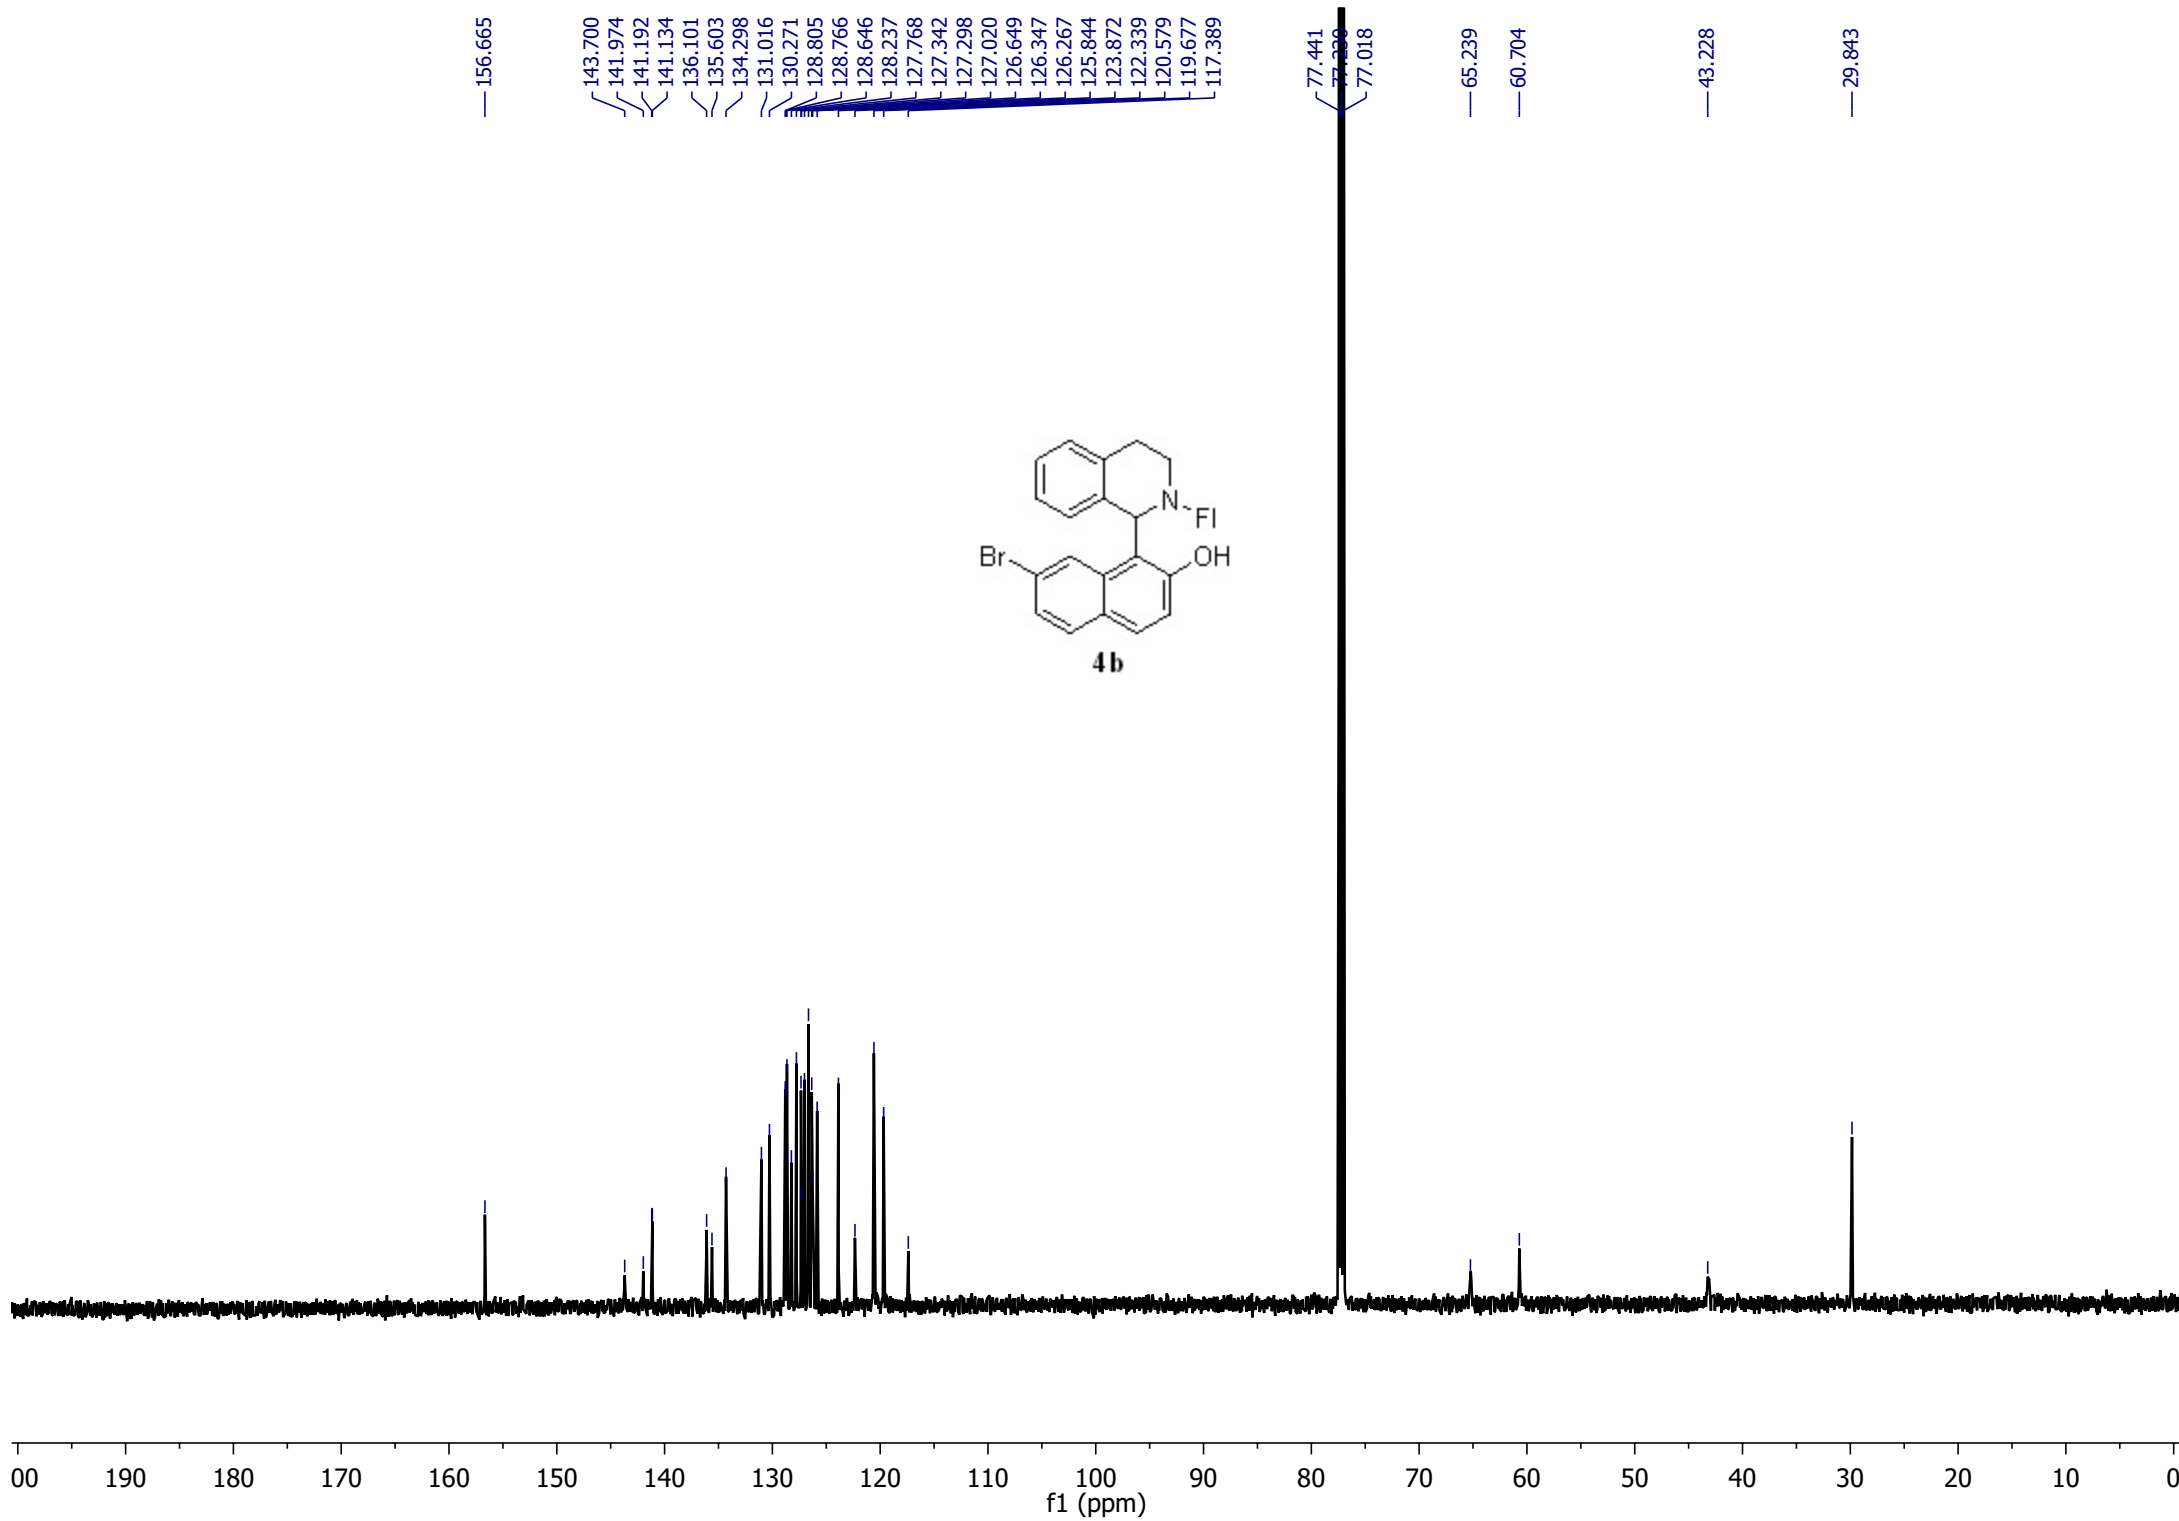

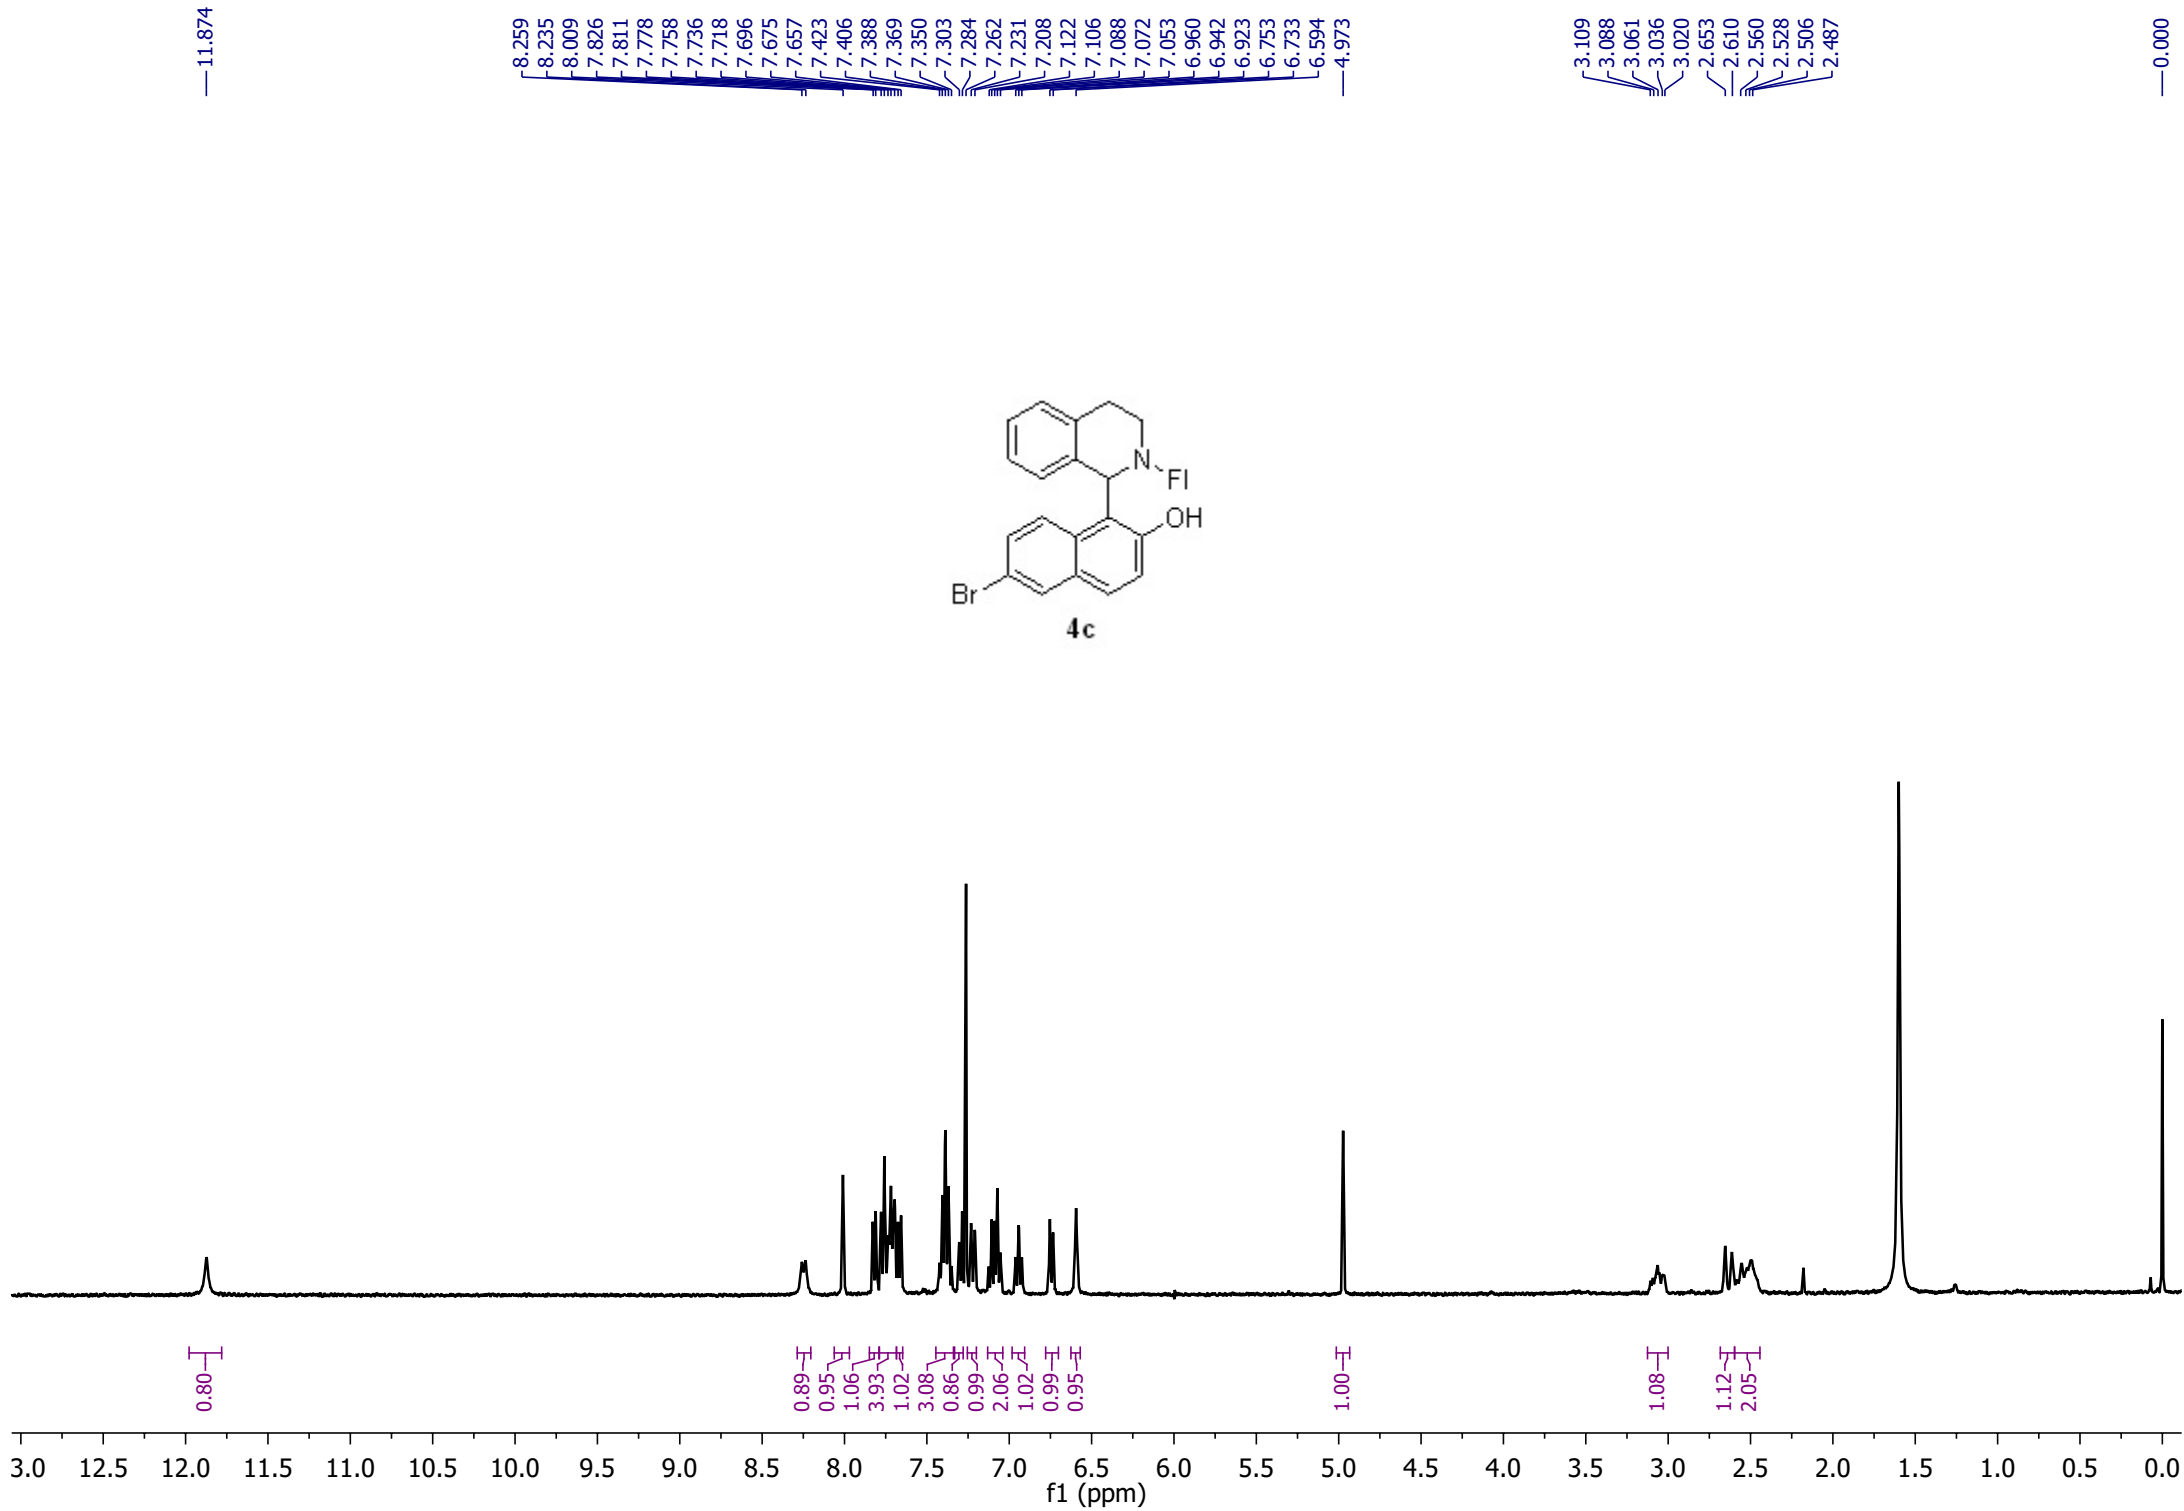

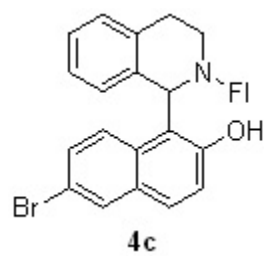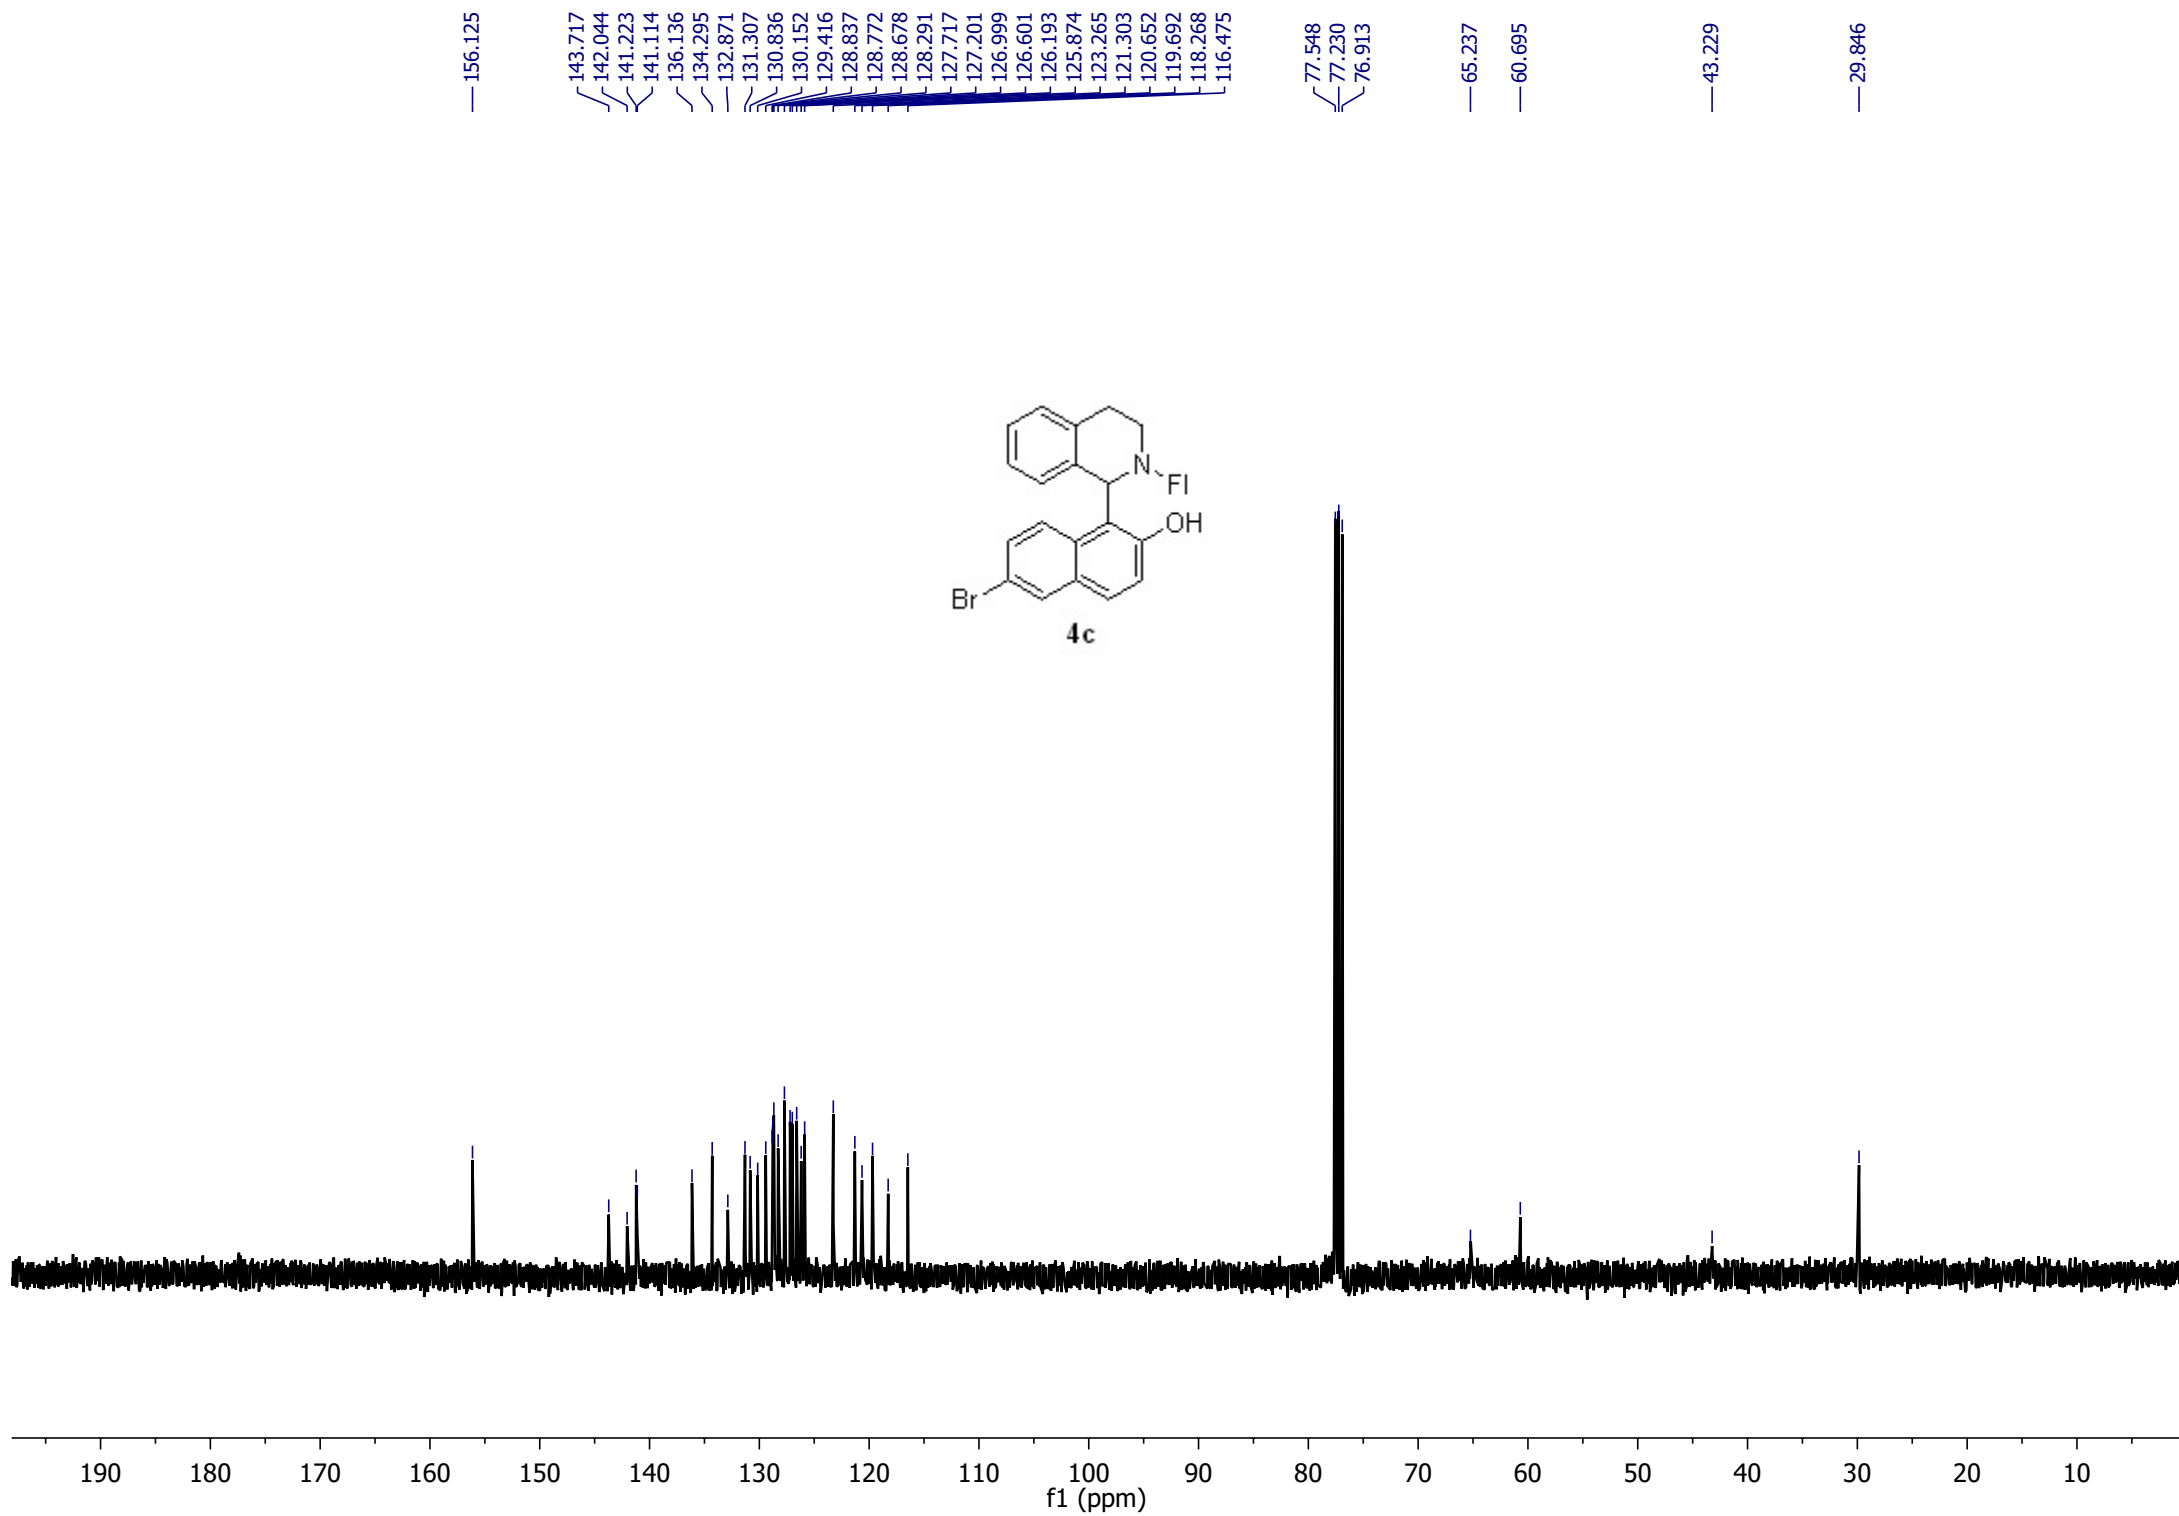

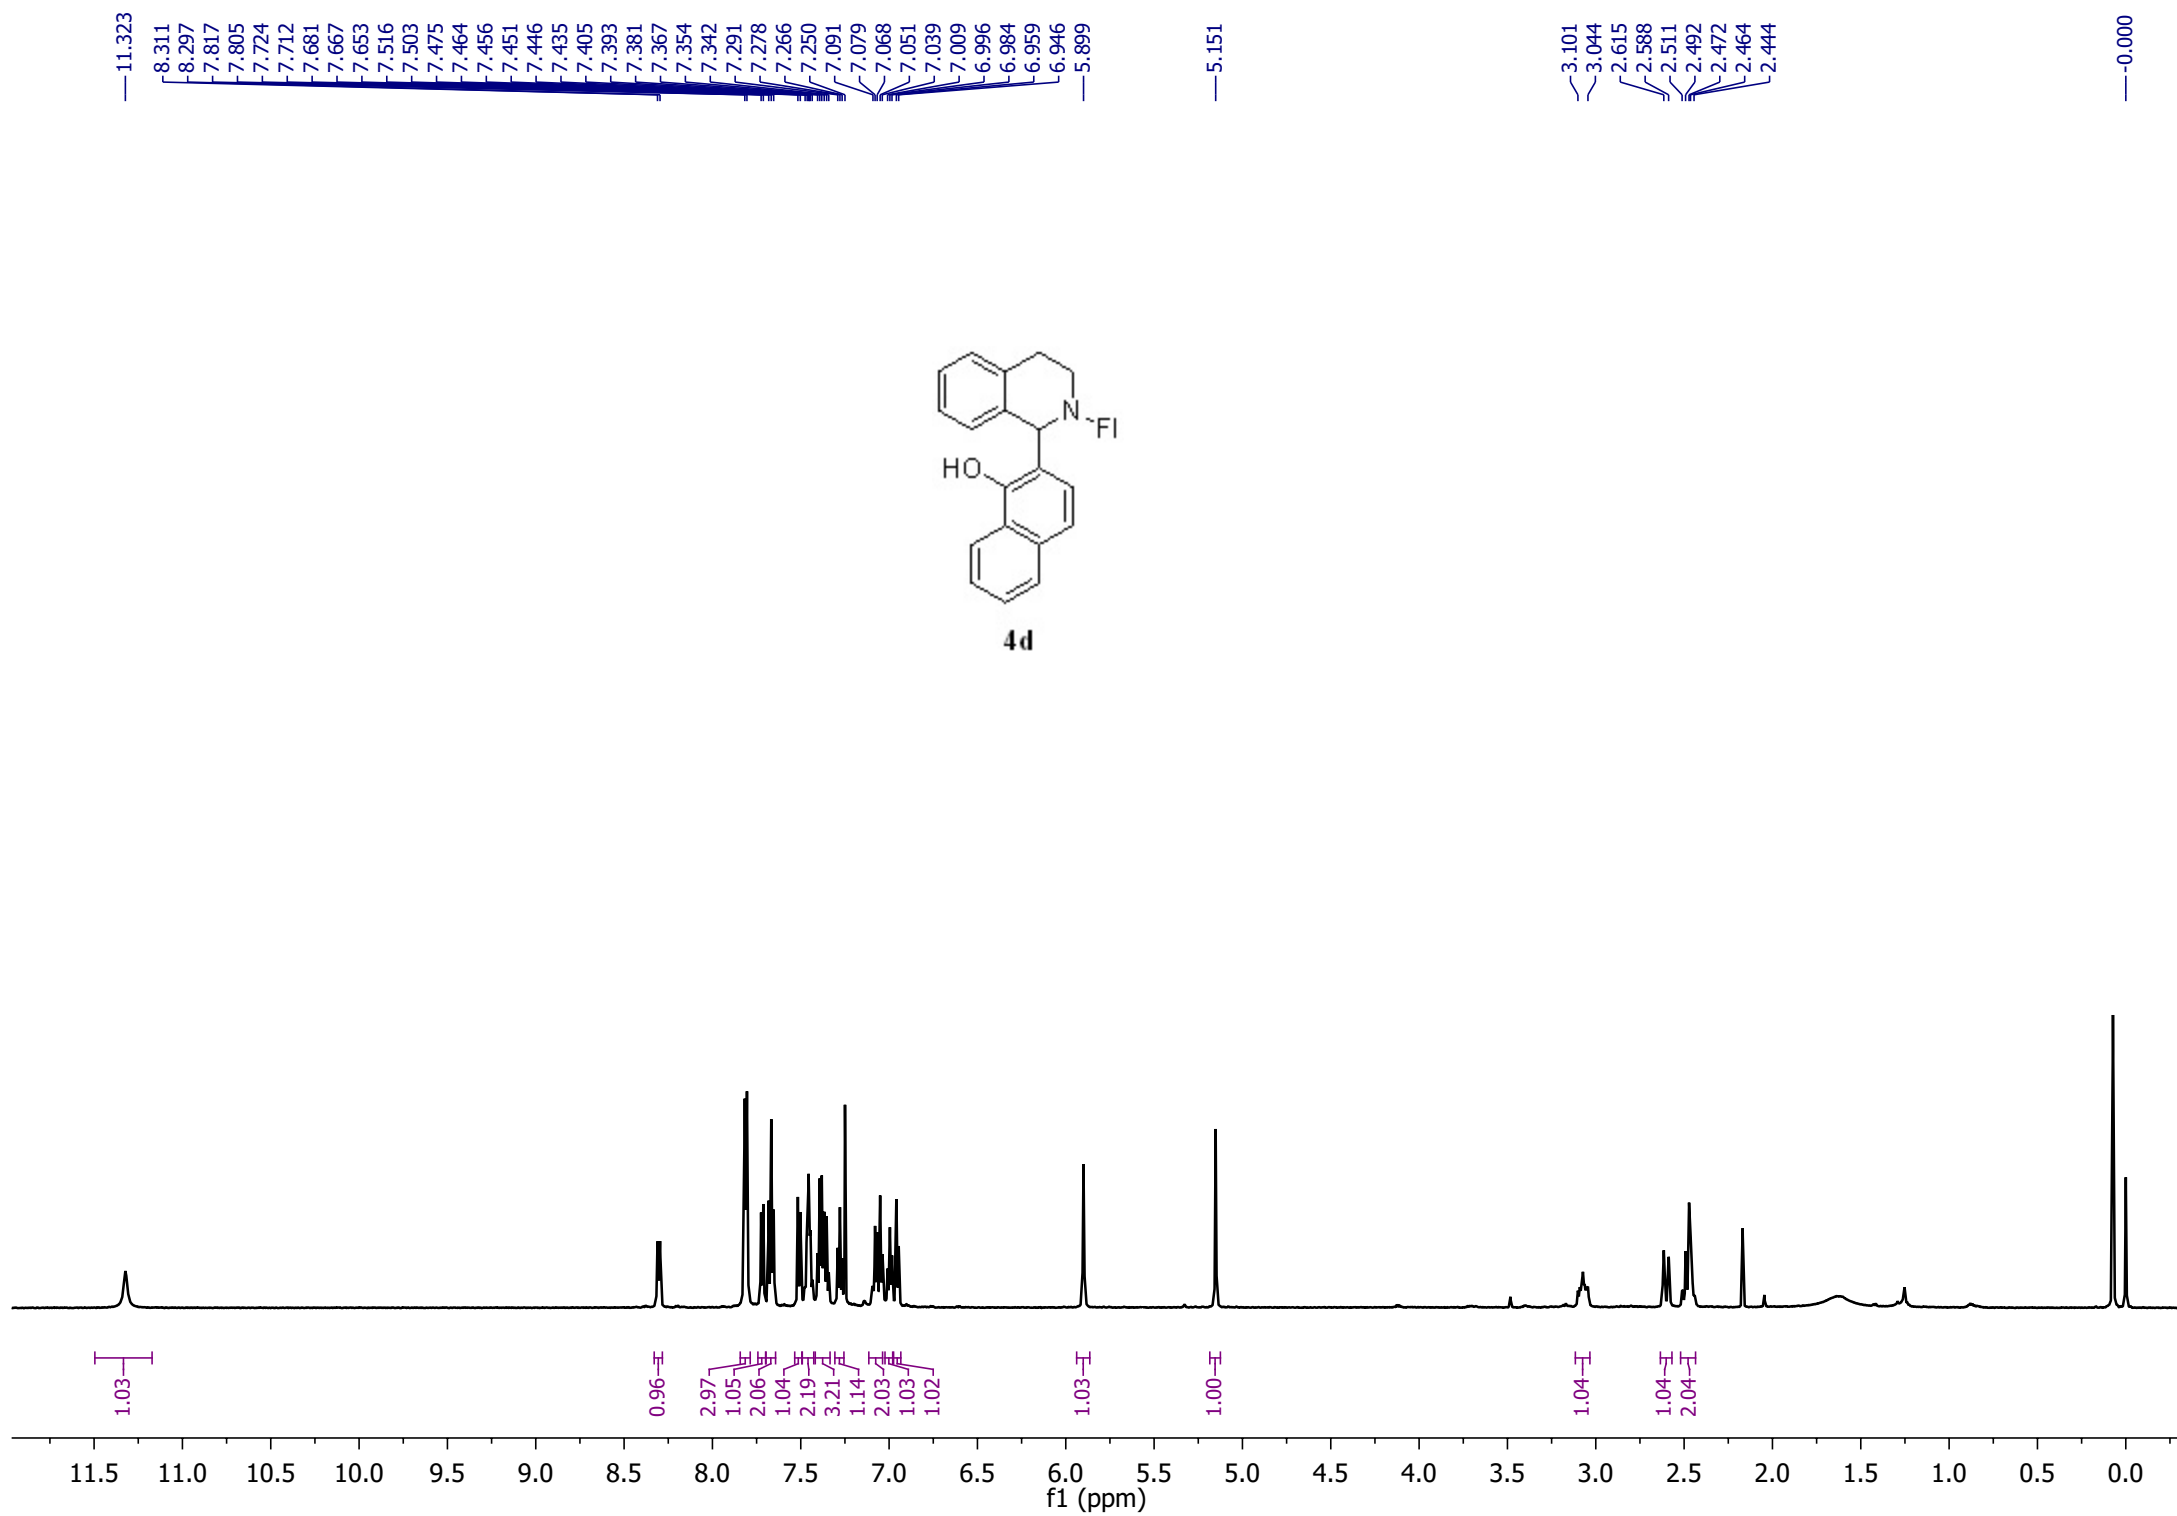

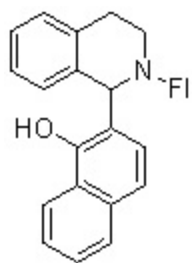

**4d**

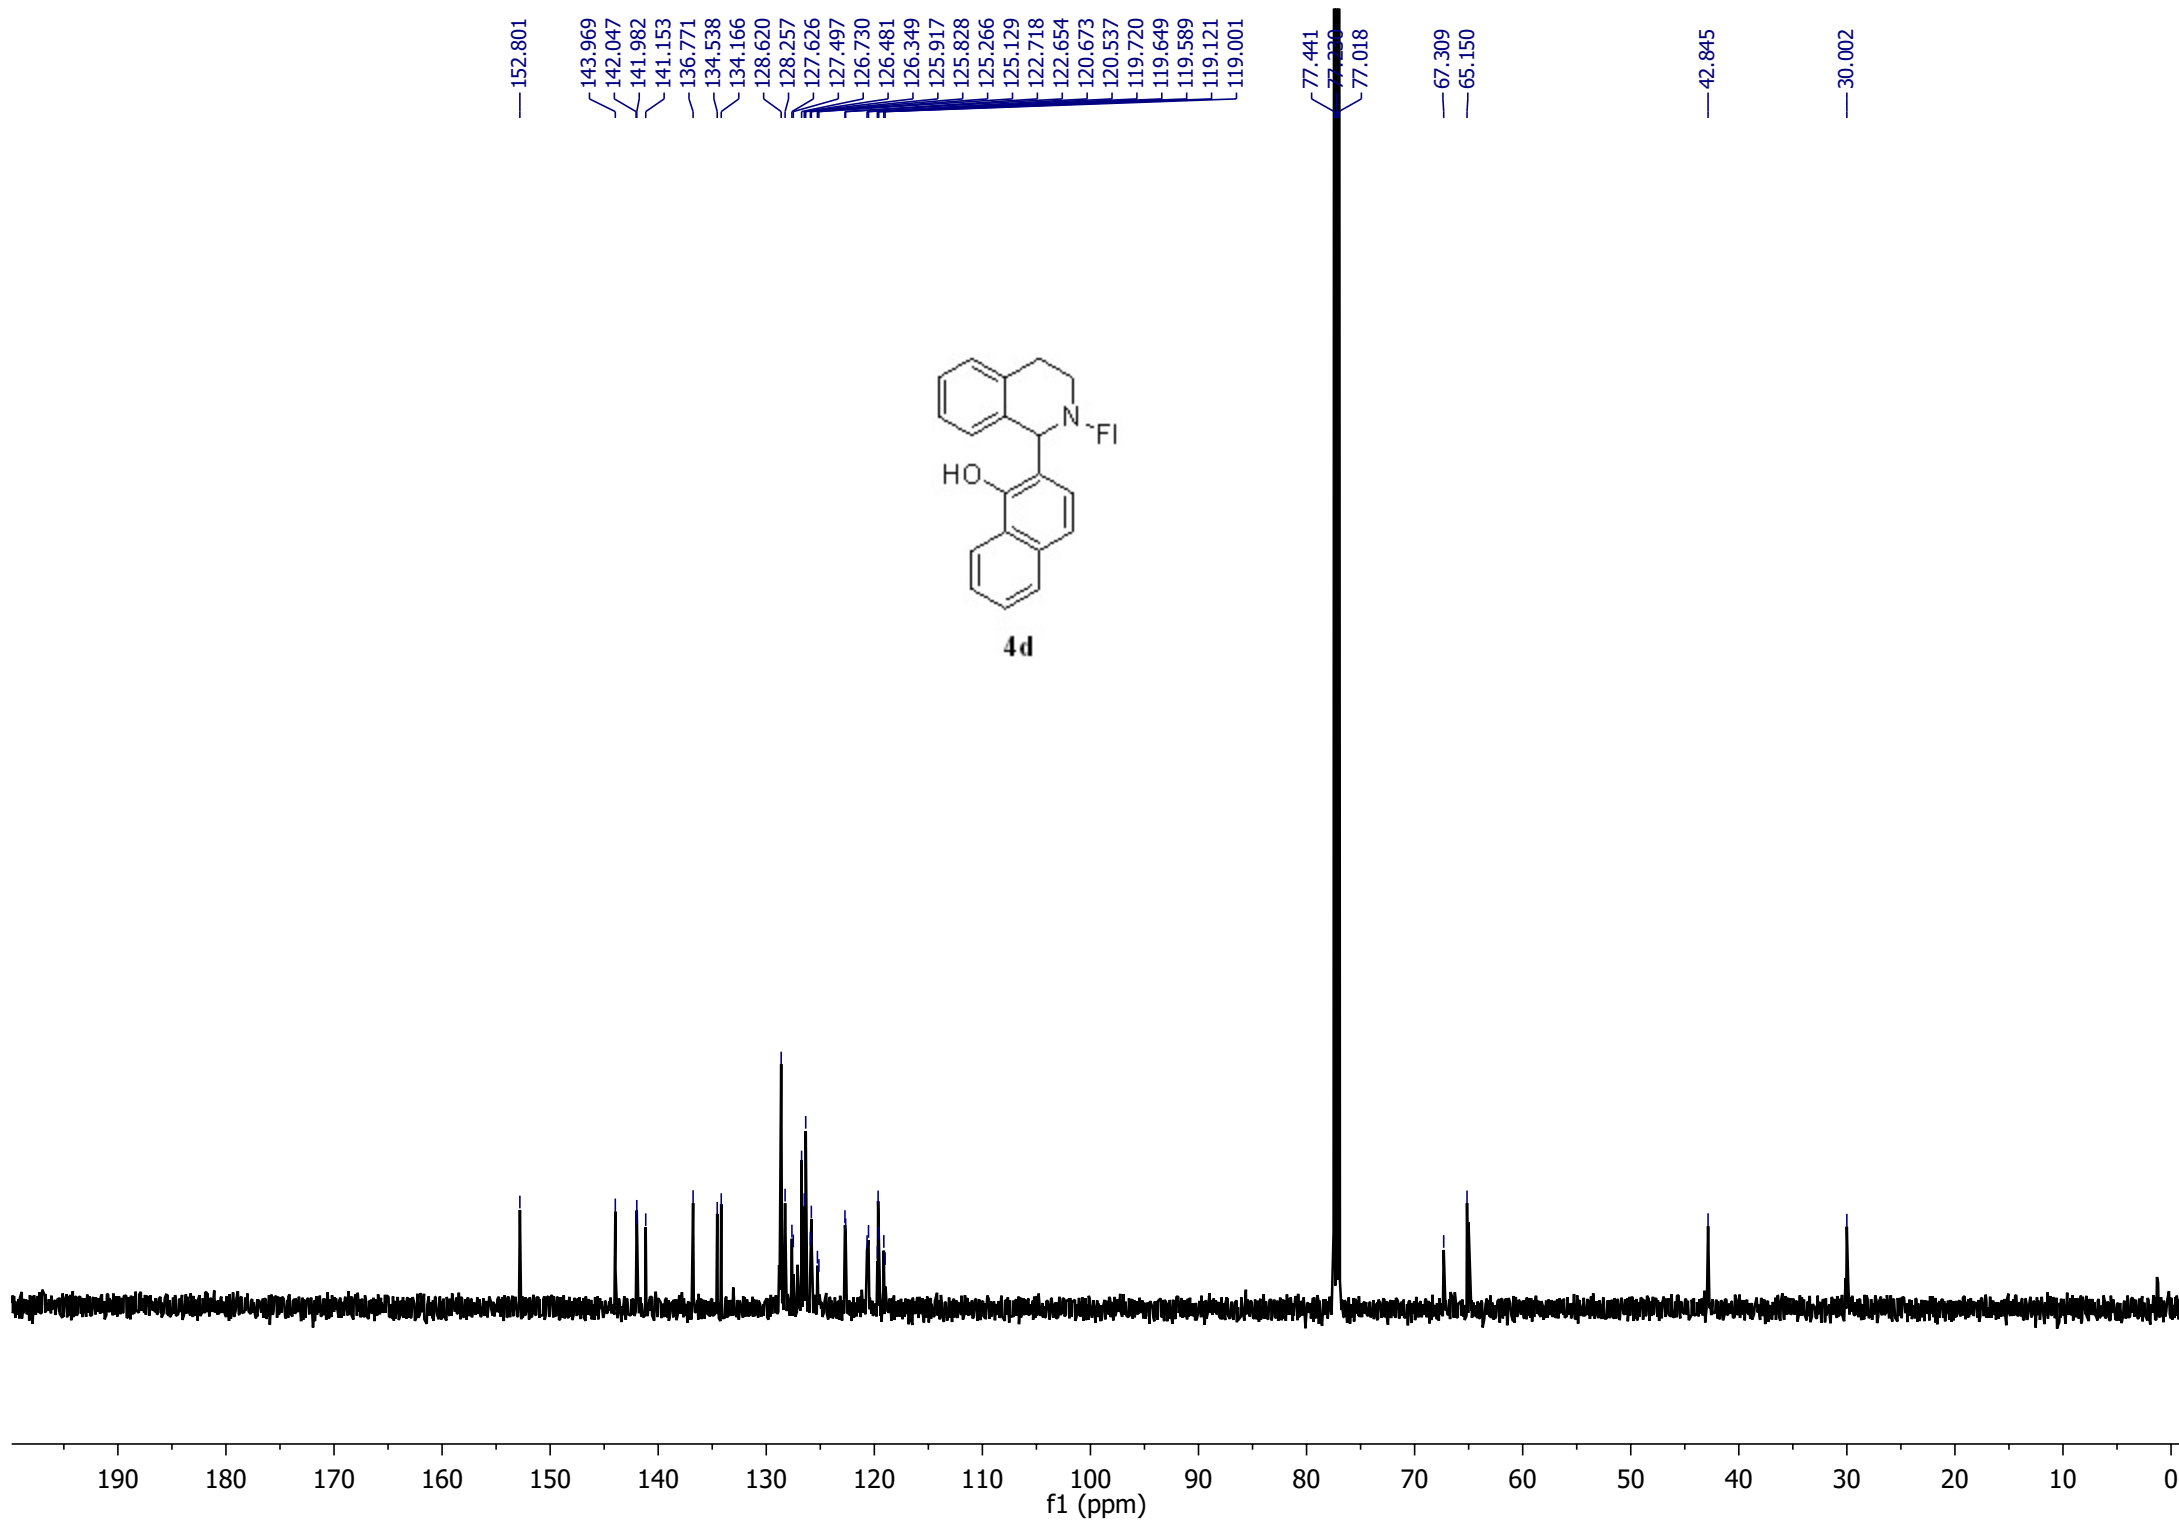

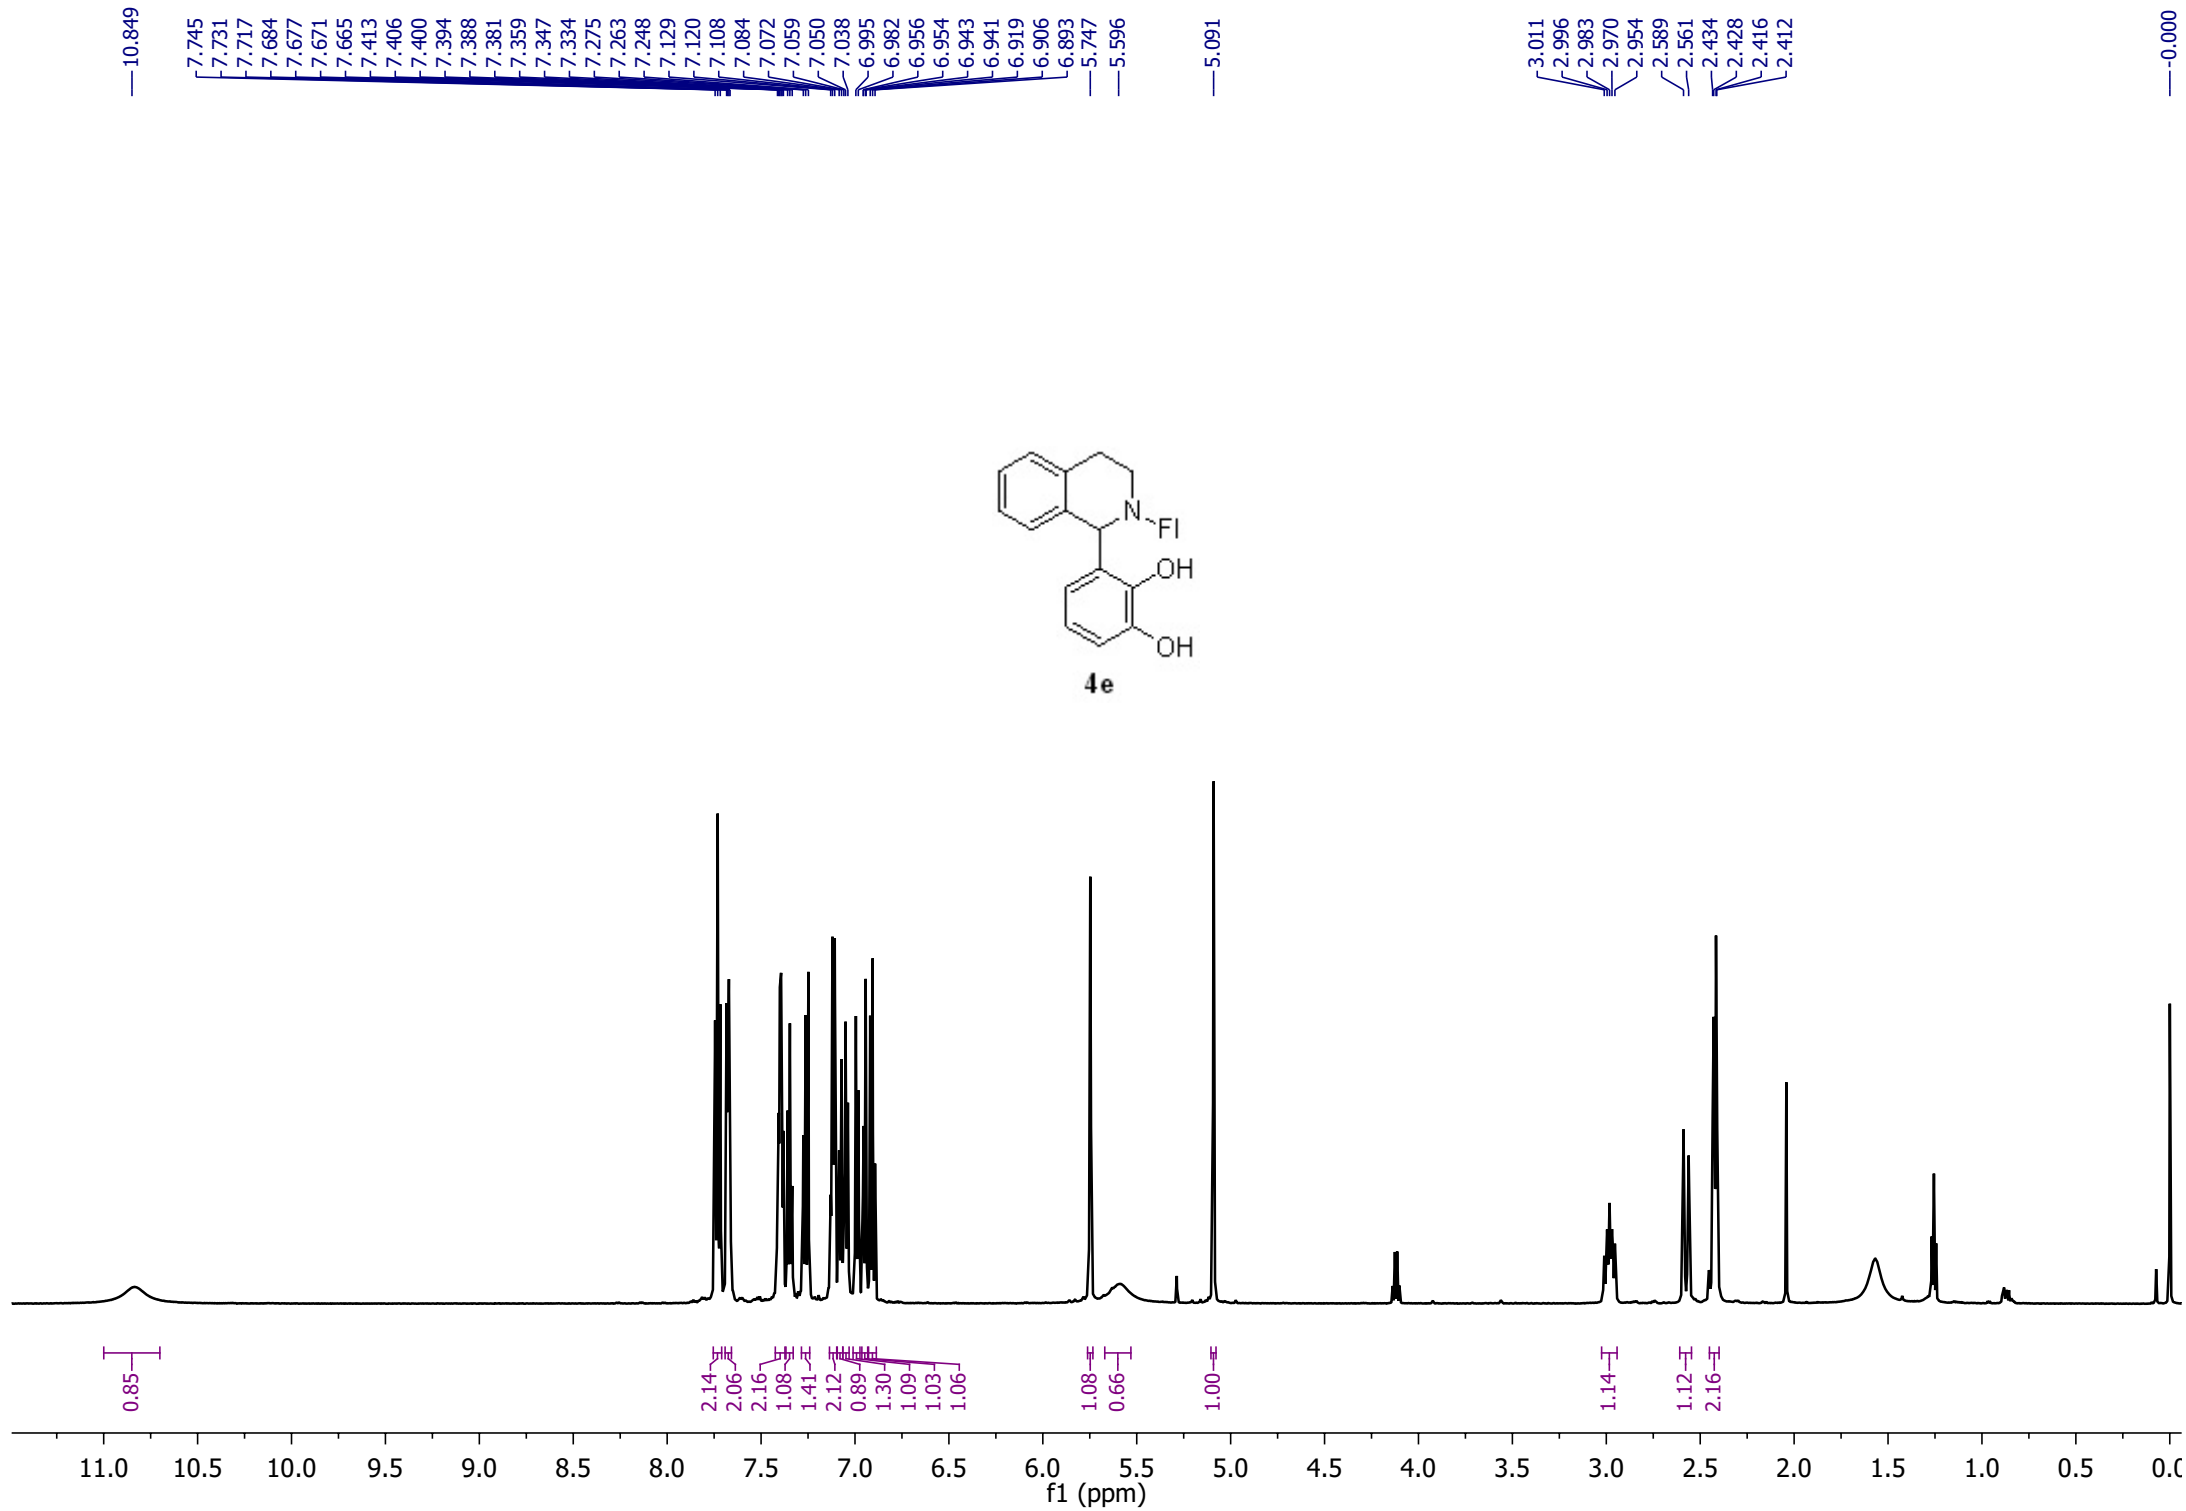

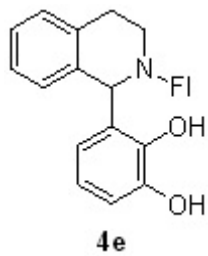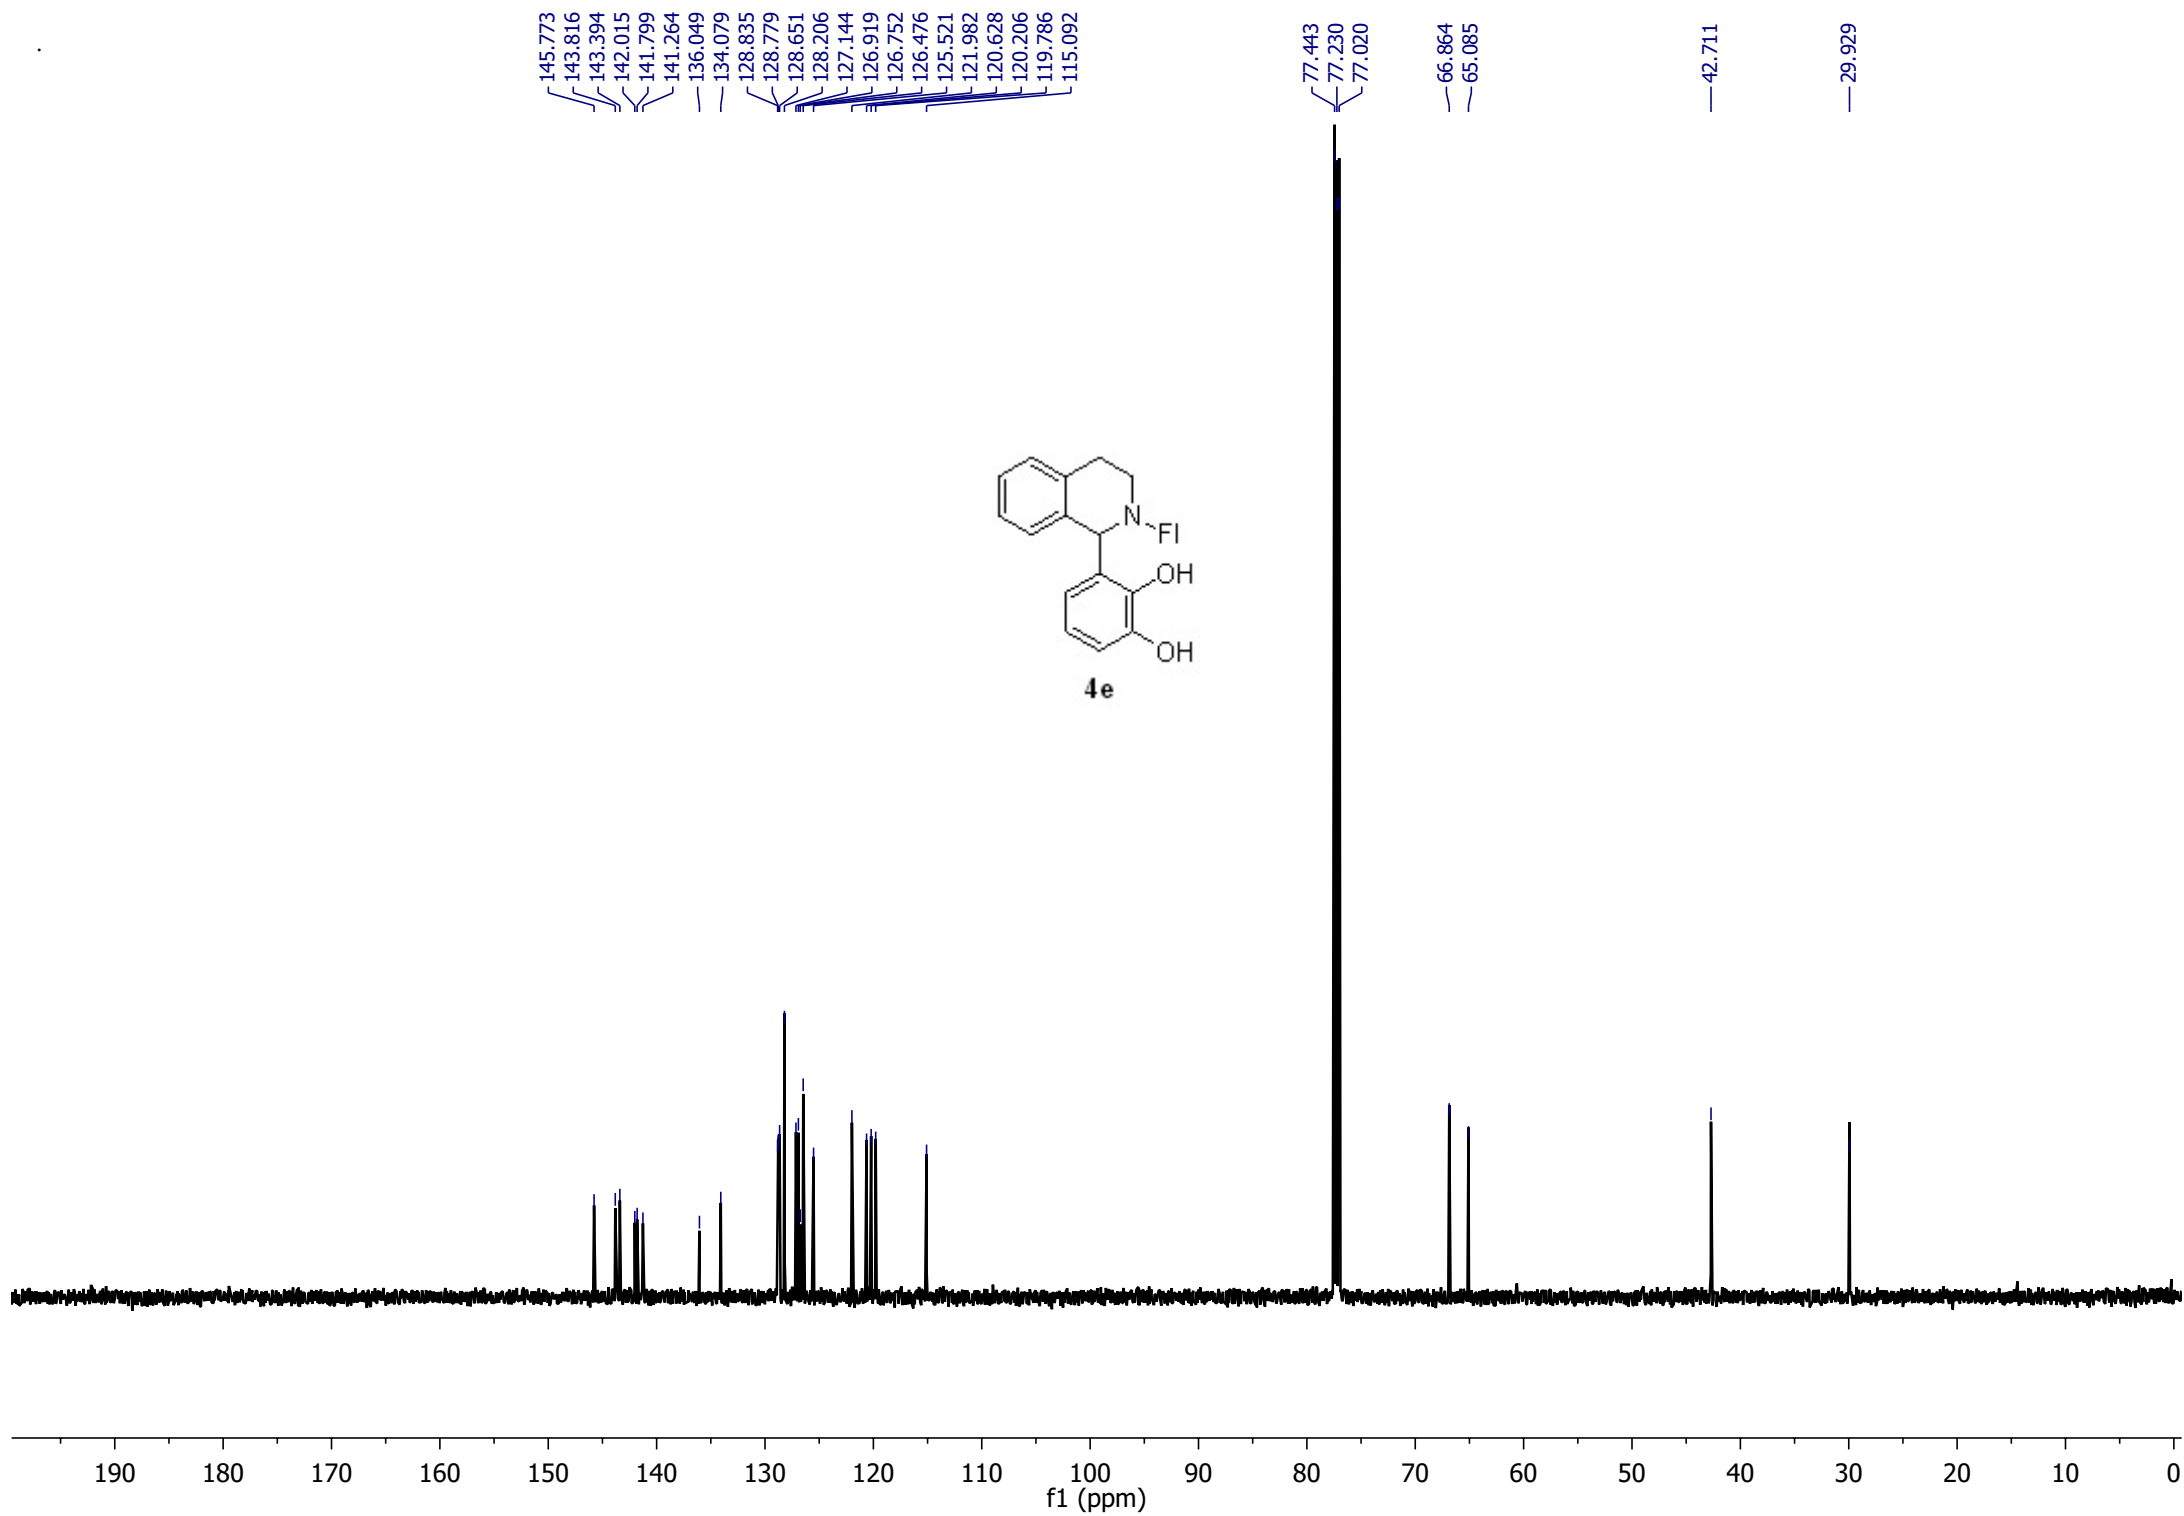

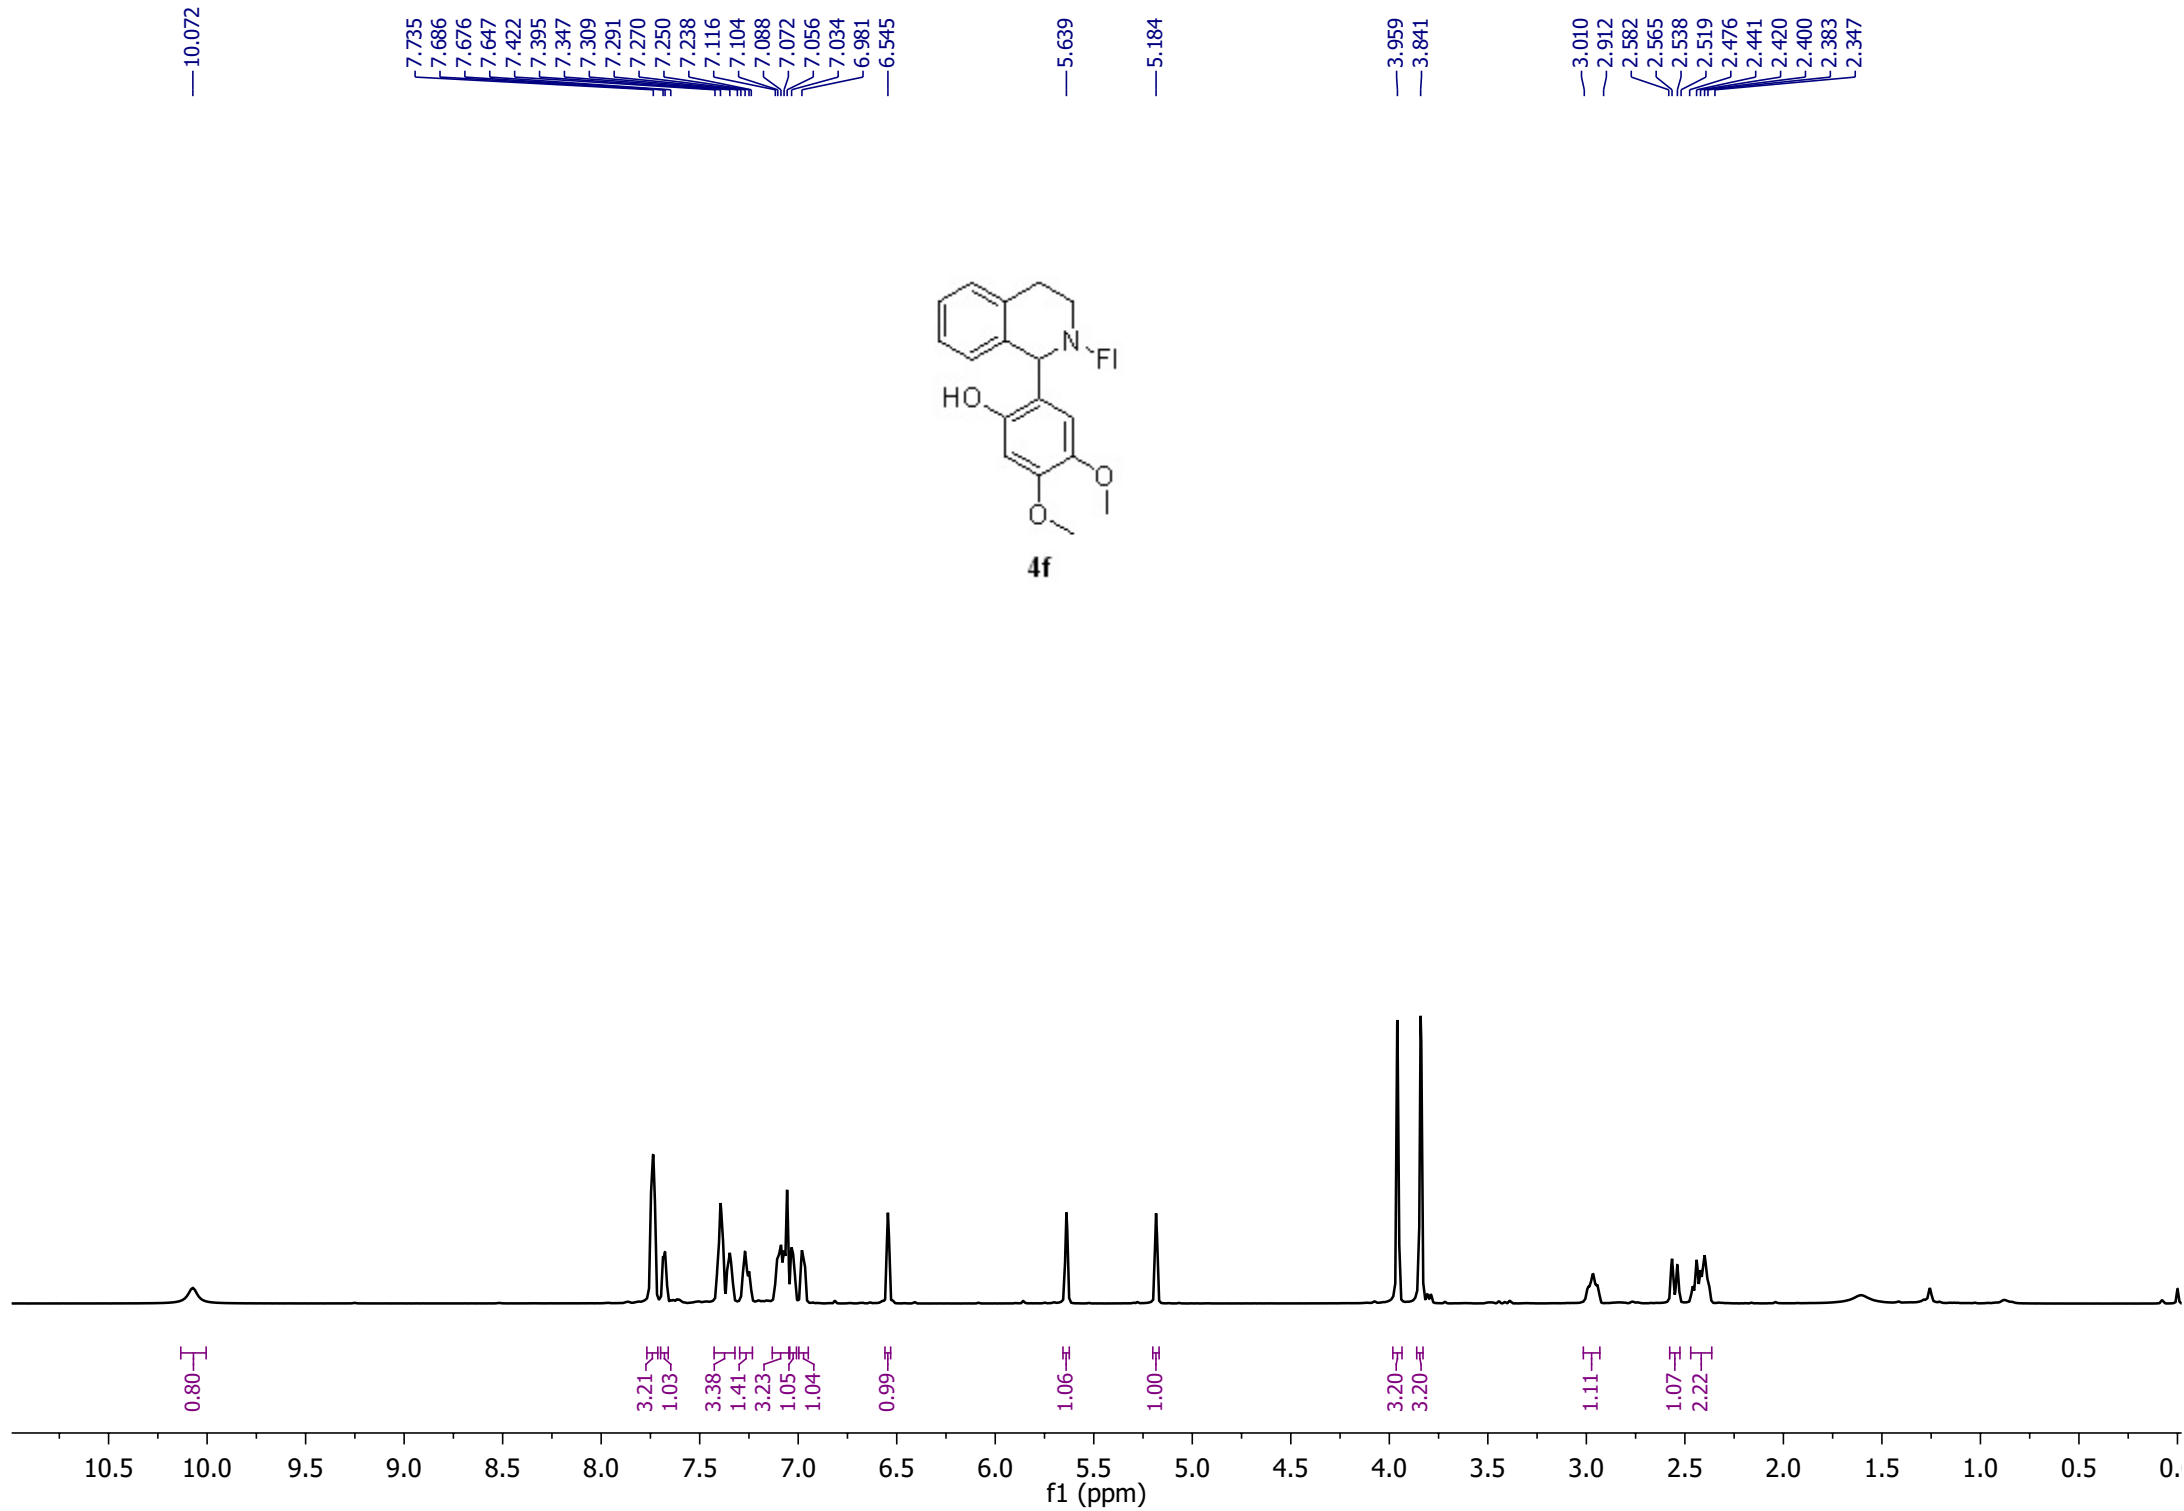

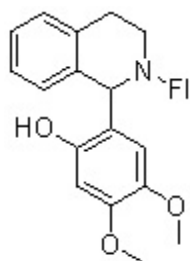

**4f**

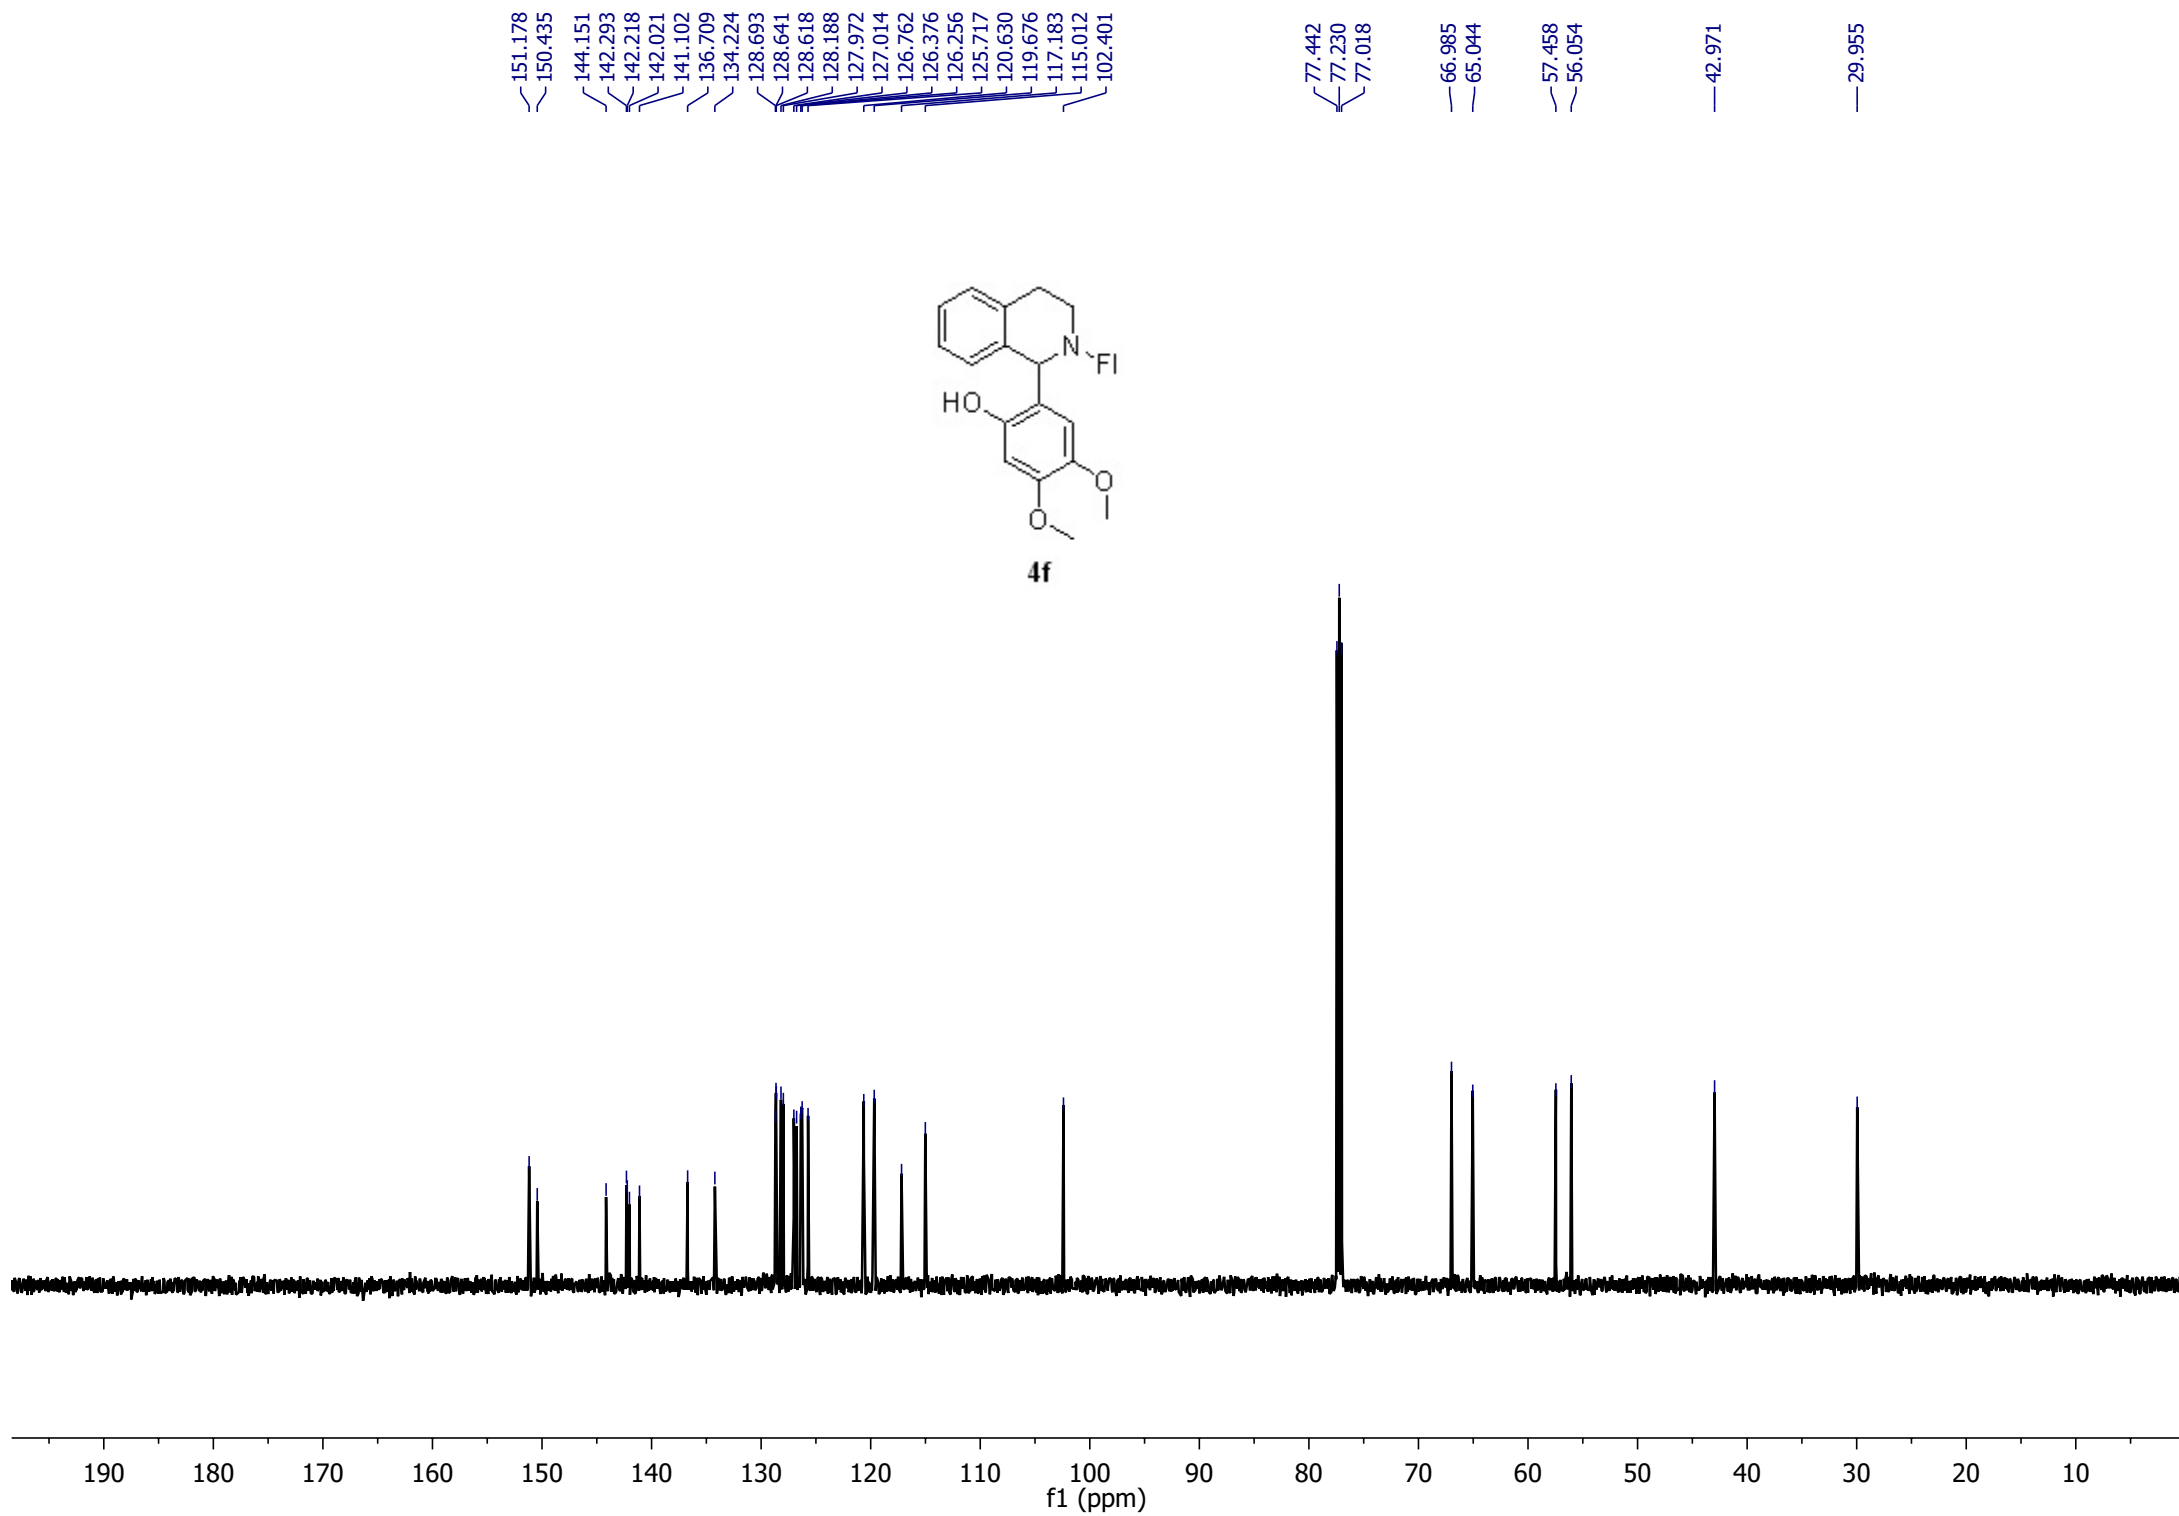

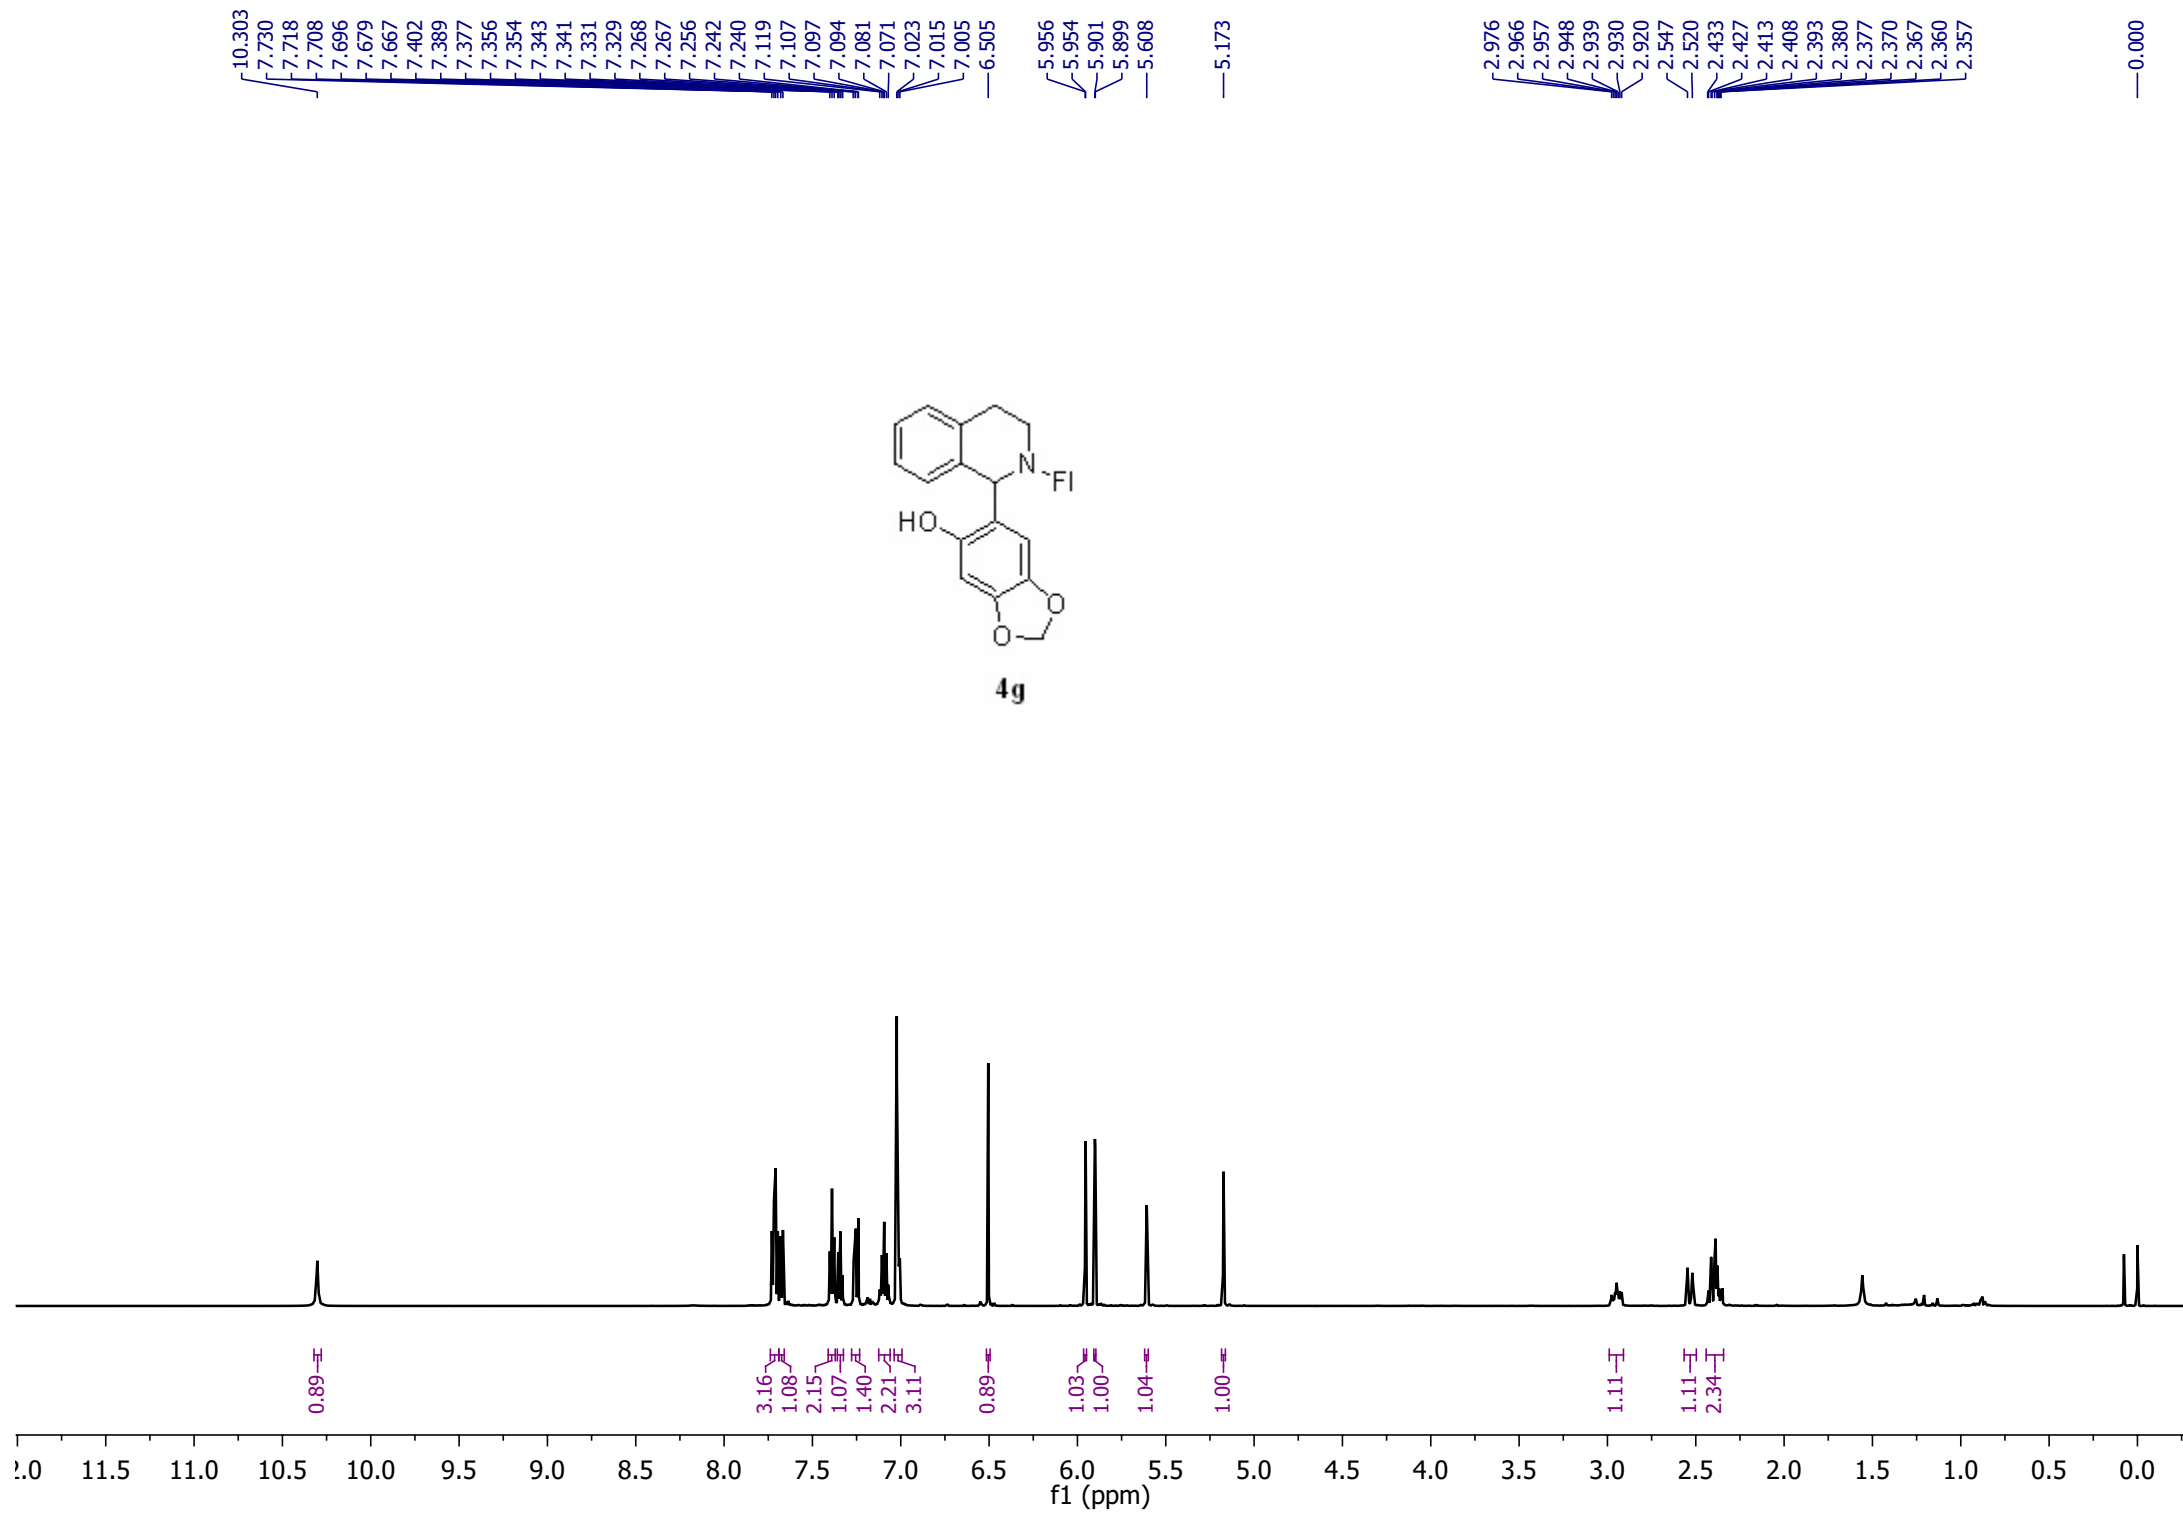

152.055  
148.518  
144.052  
142.023  
141.114  
140.728  
136.548  
134.266  
128.736  
128.647  
128.225  
127.935  
127.062  
126.817  
126.382  
126.319  
125.710  
120.610  
119.674  
117.894  
  
110.167  
  
101.288  
100.144  
  
67.099  
64.905  
  
42.856  
  
29.894

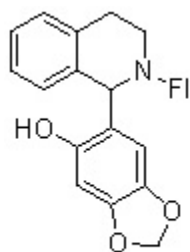

**4g**

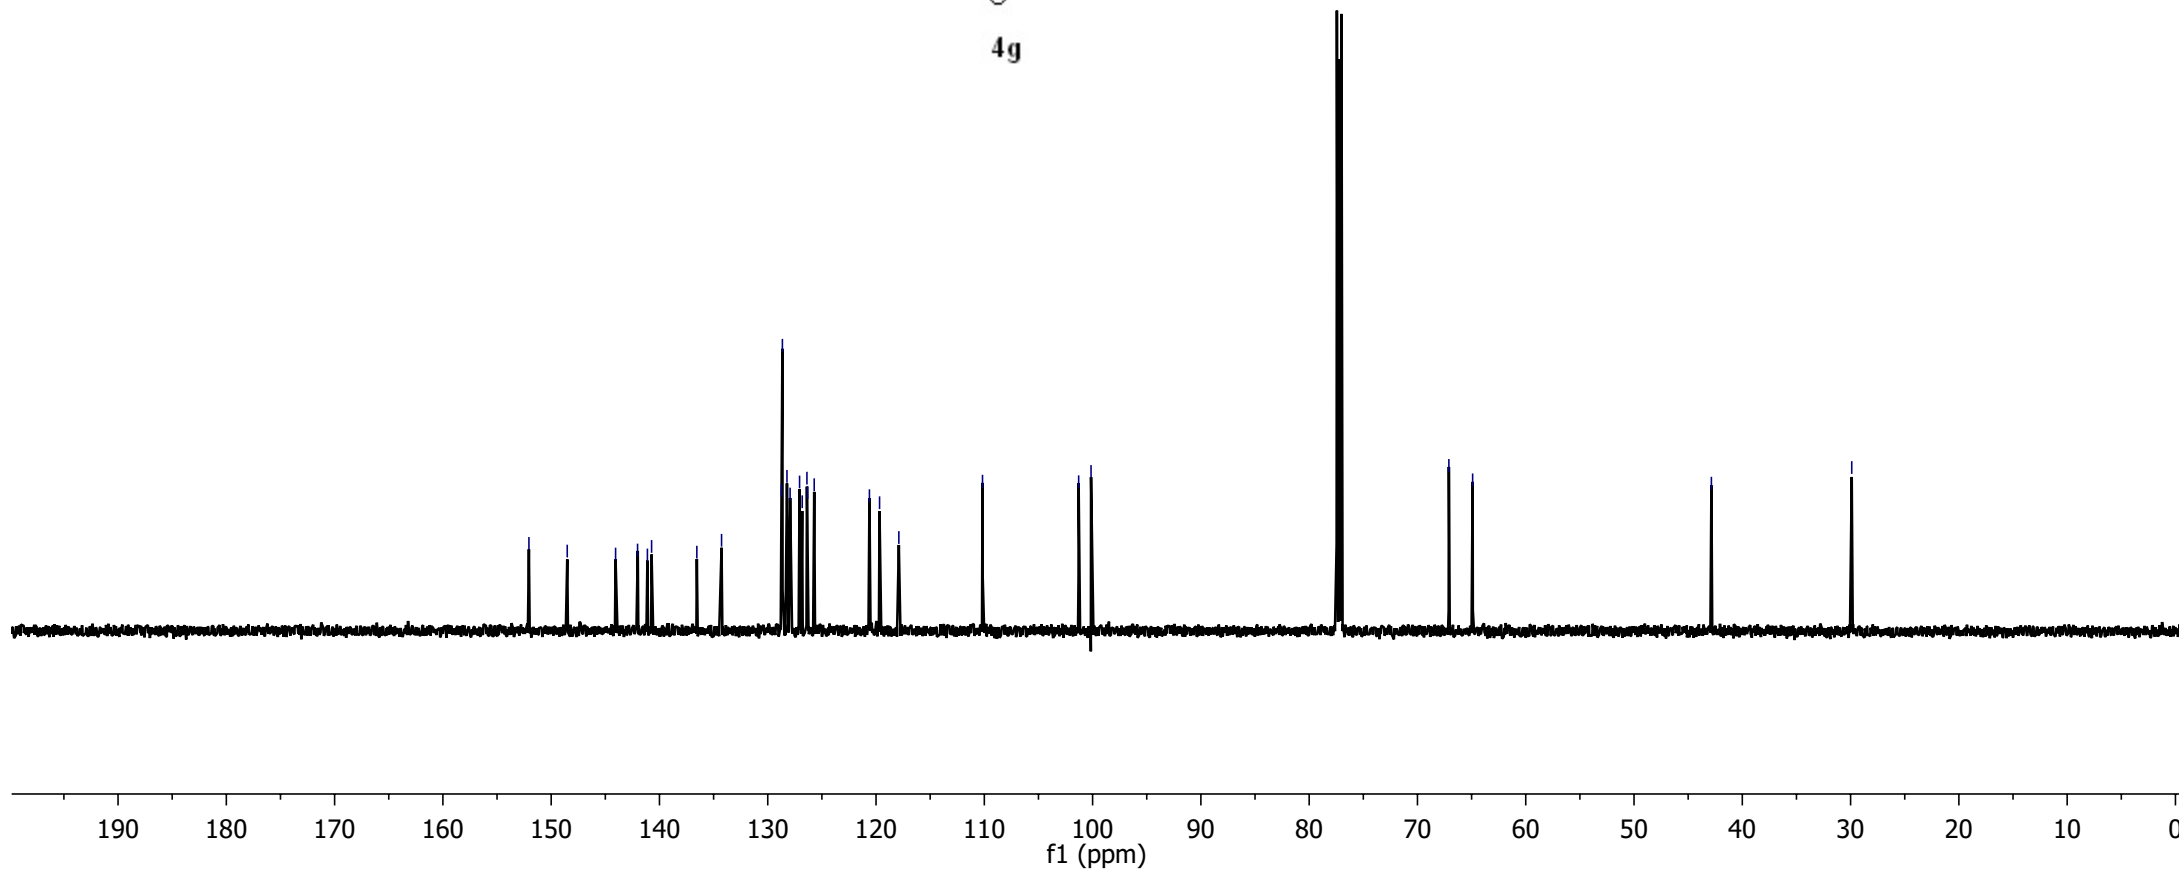

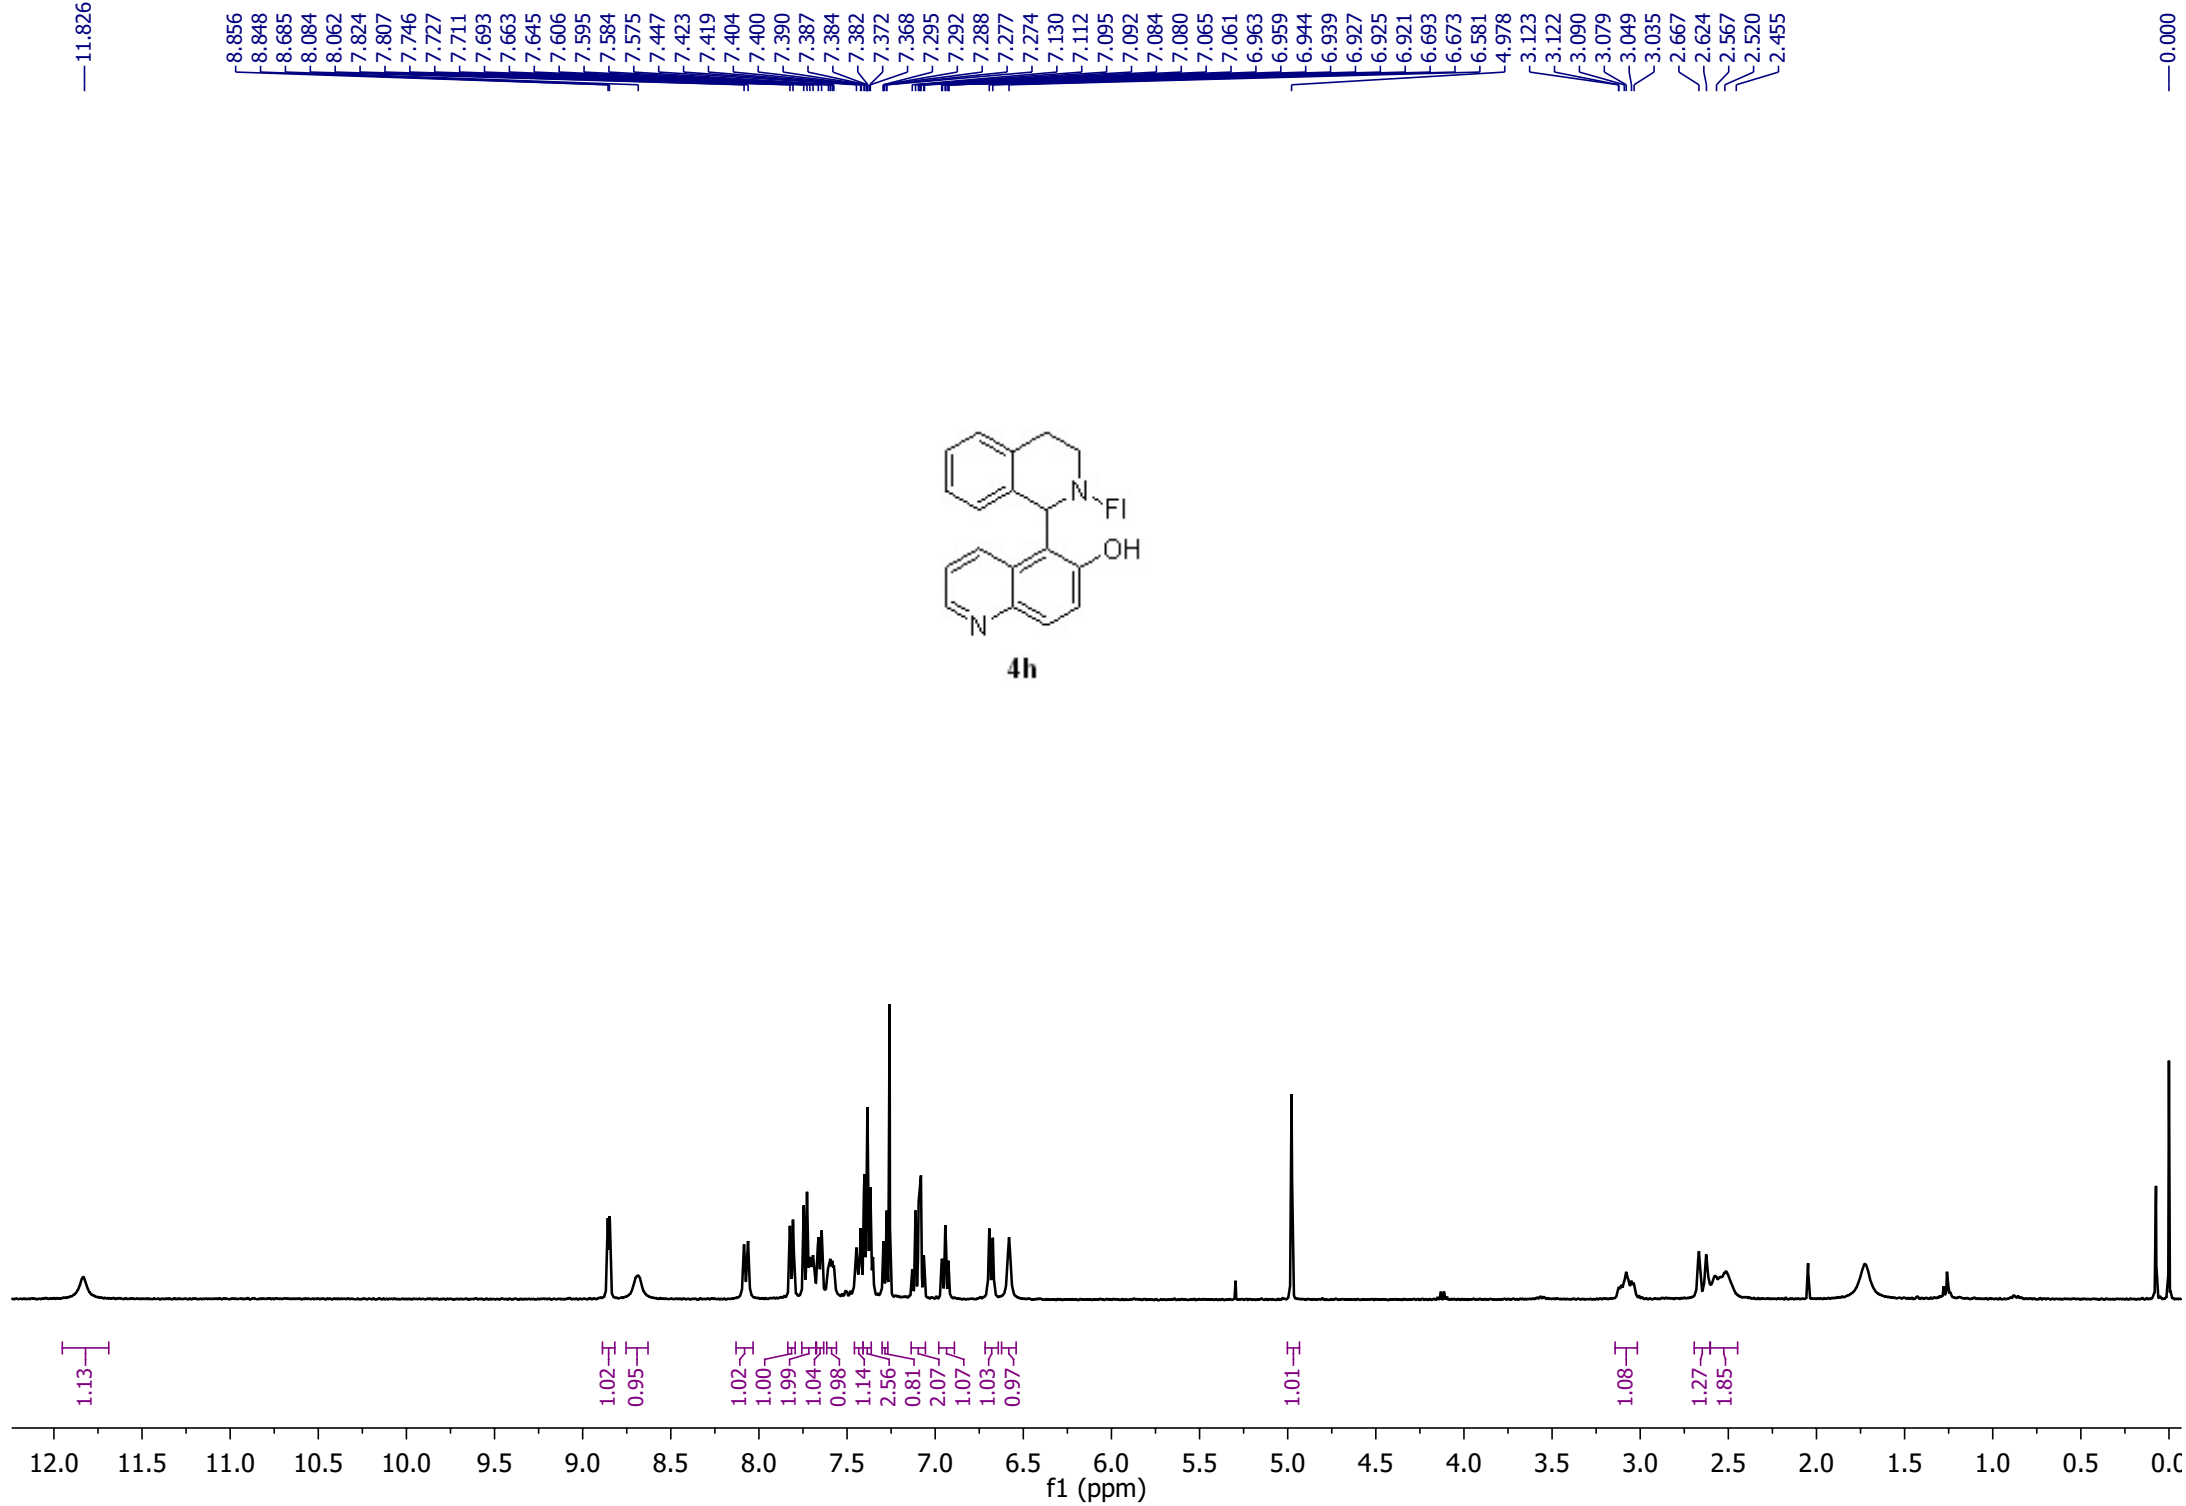

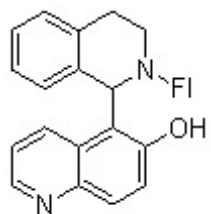

4h

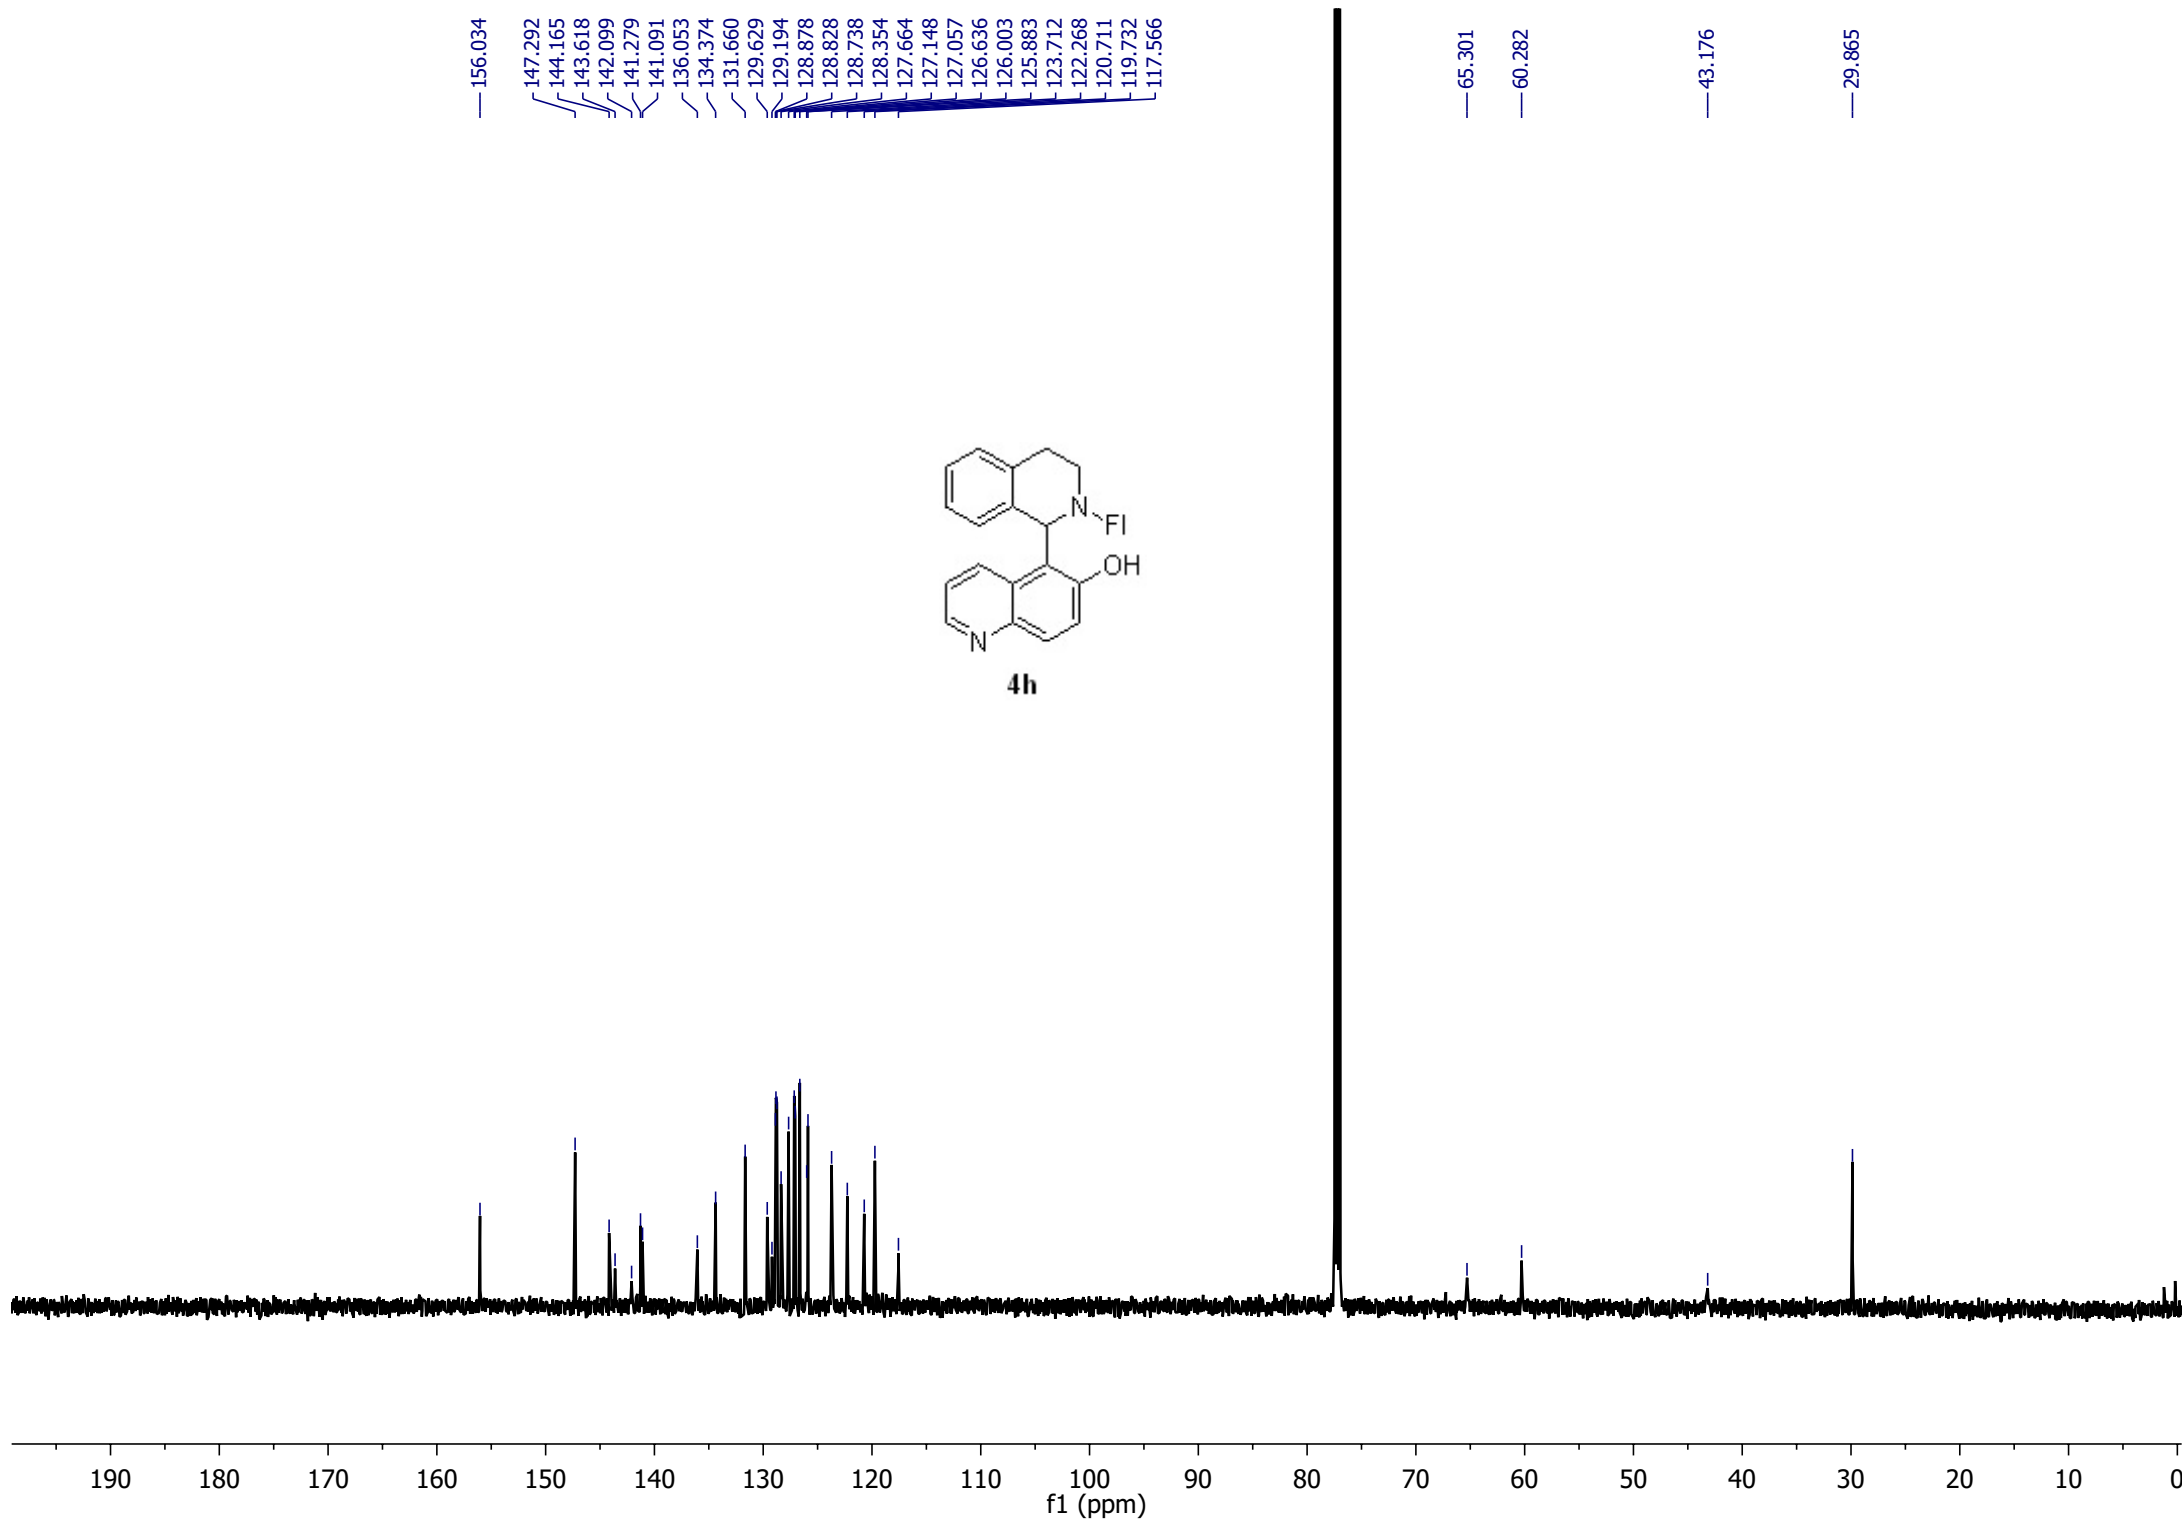

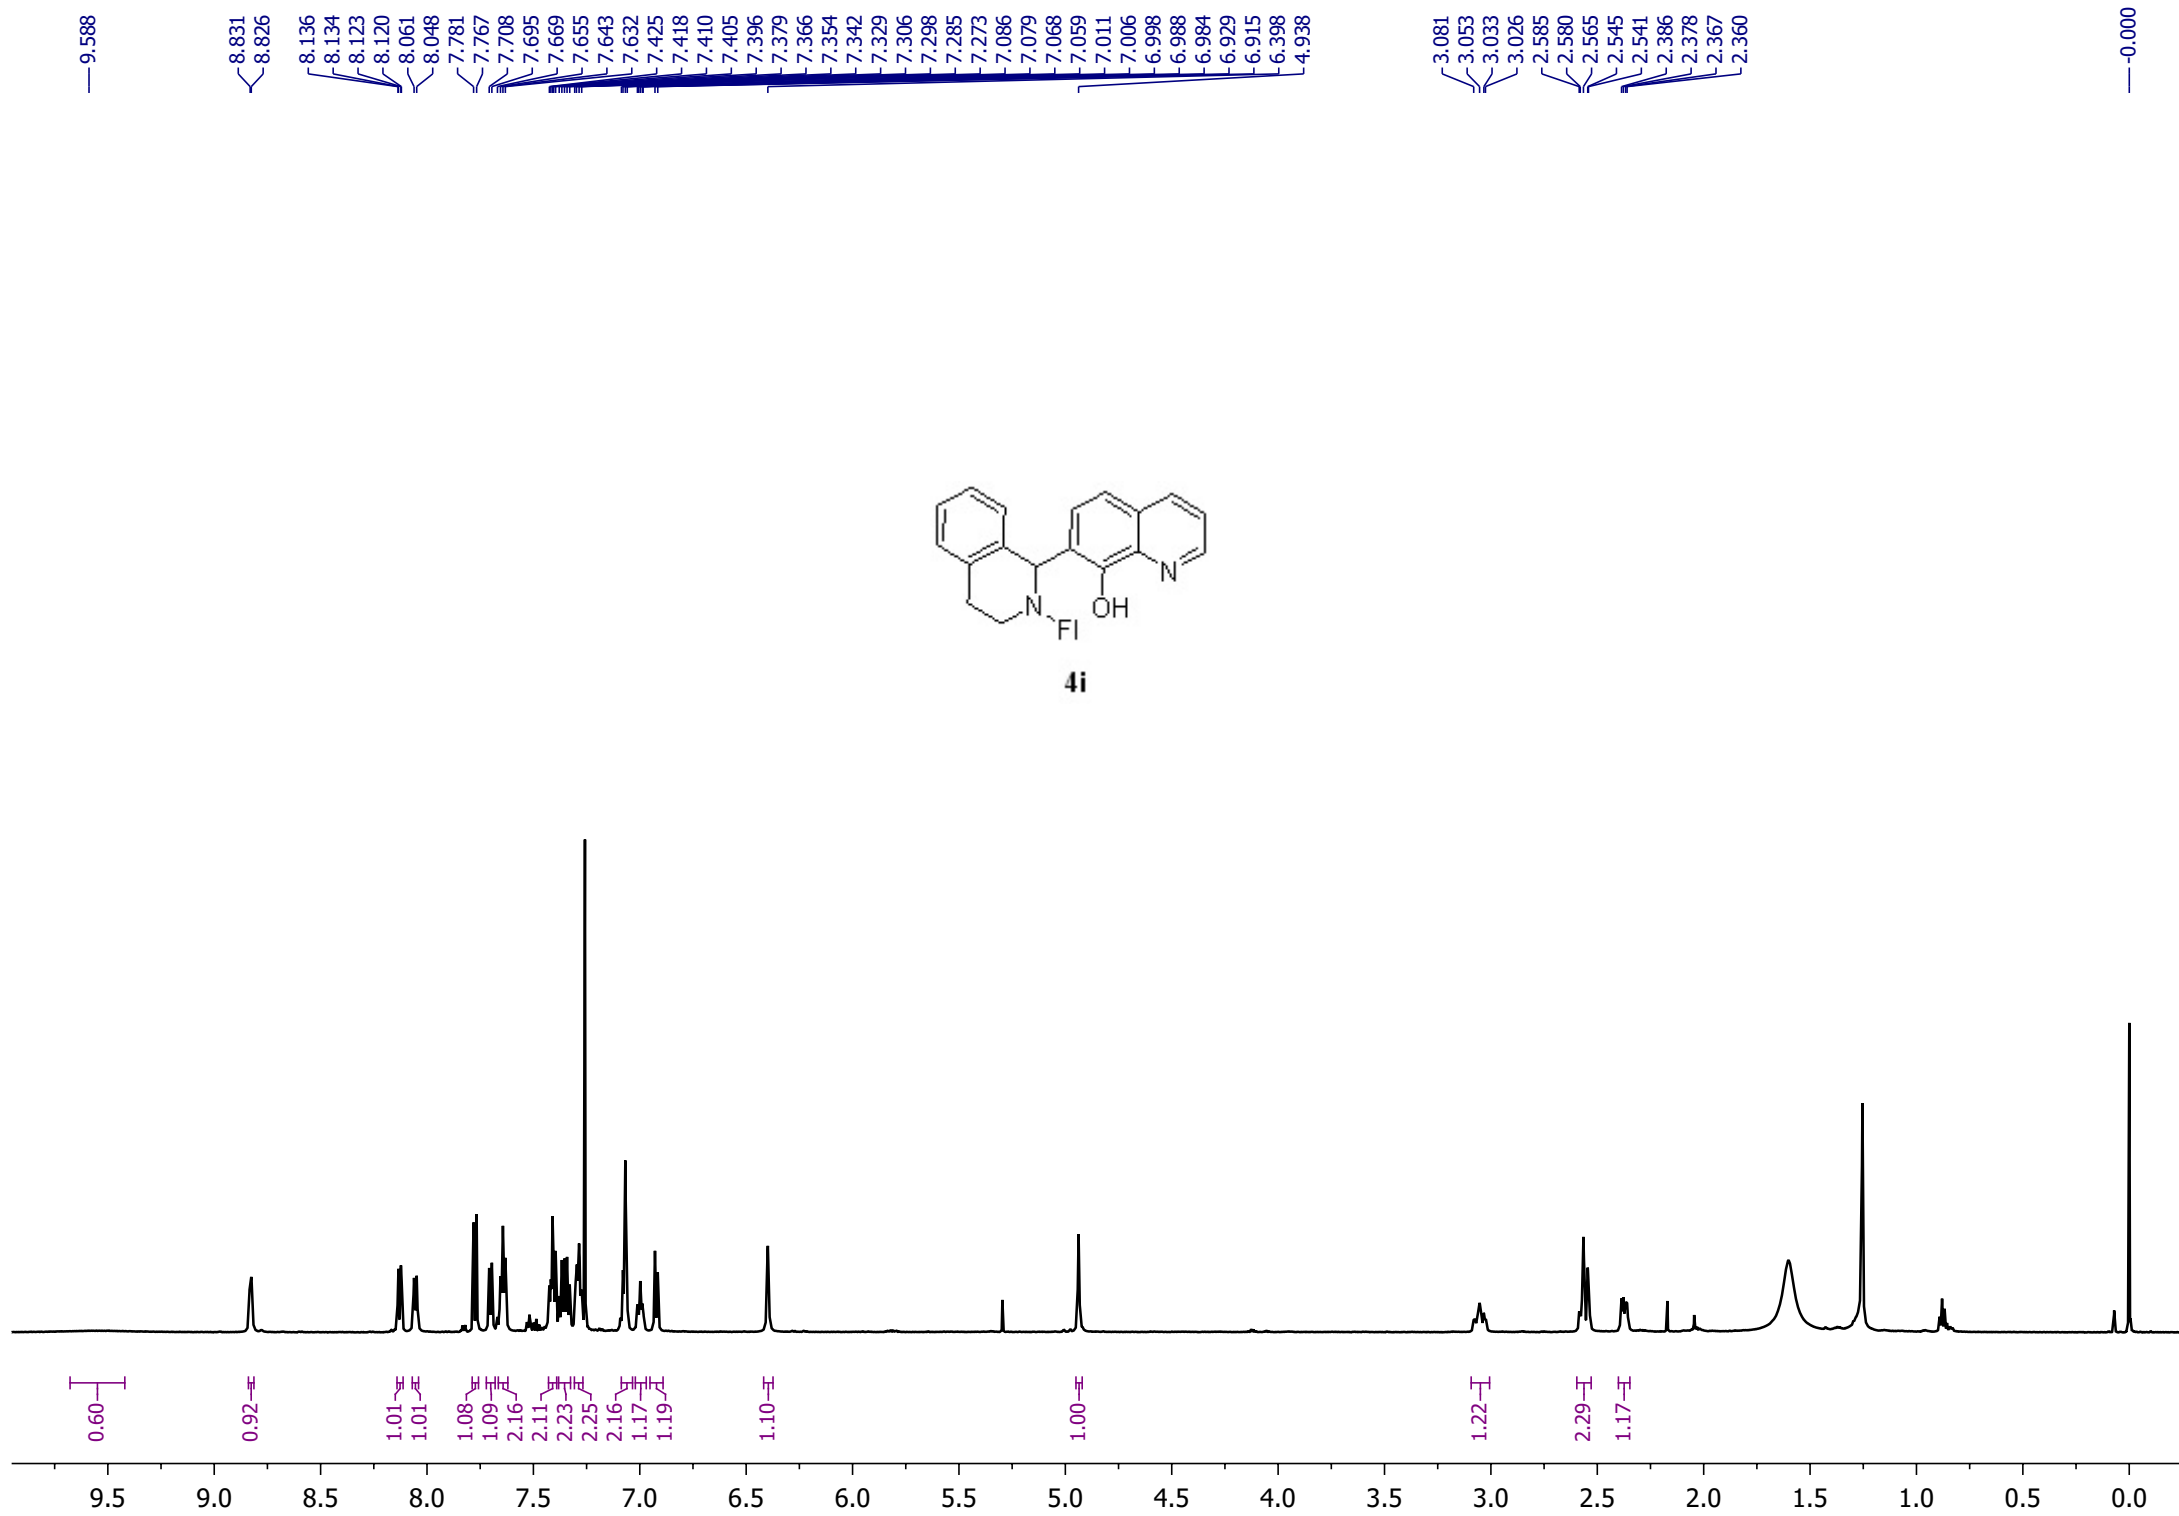

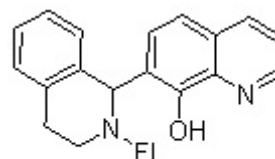

4i

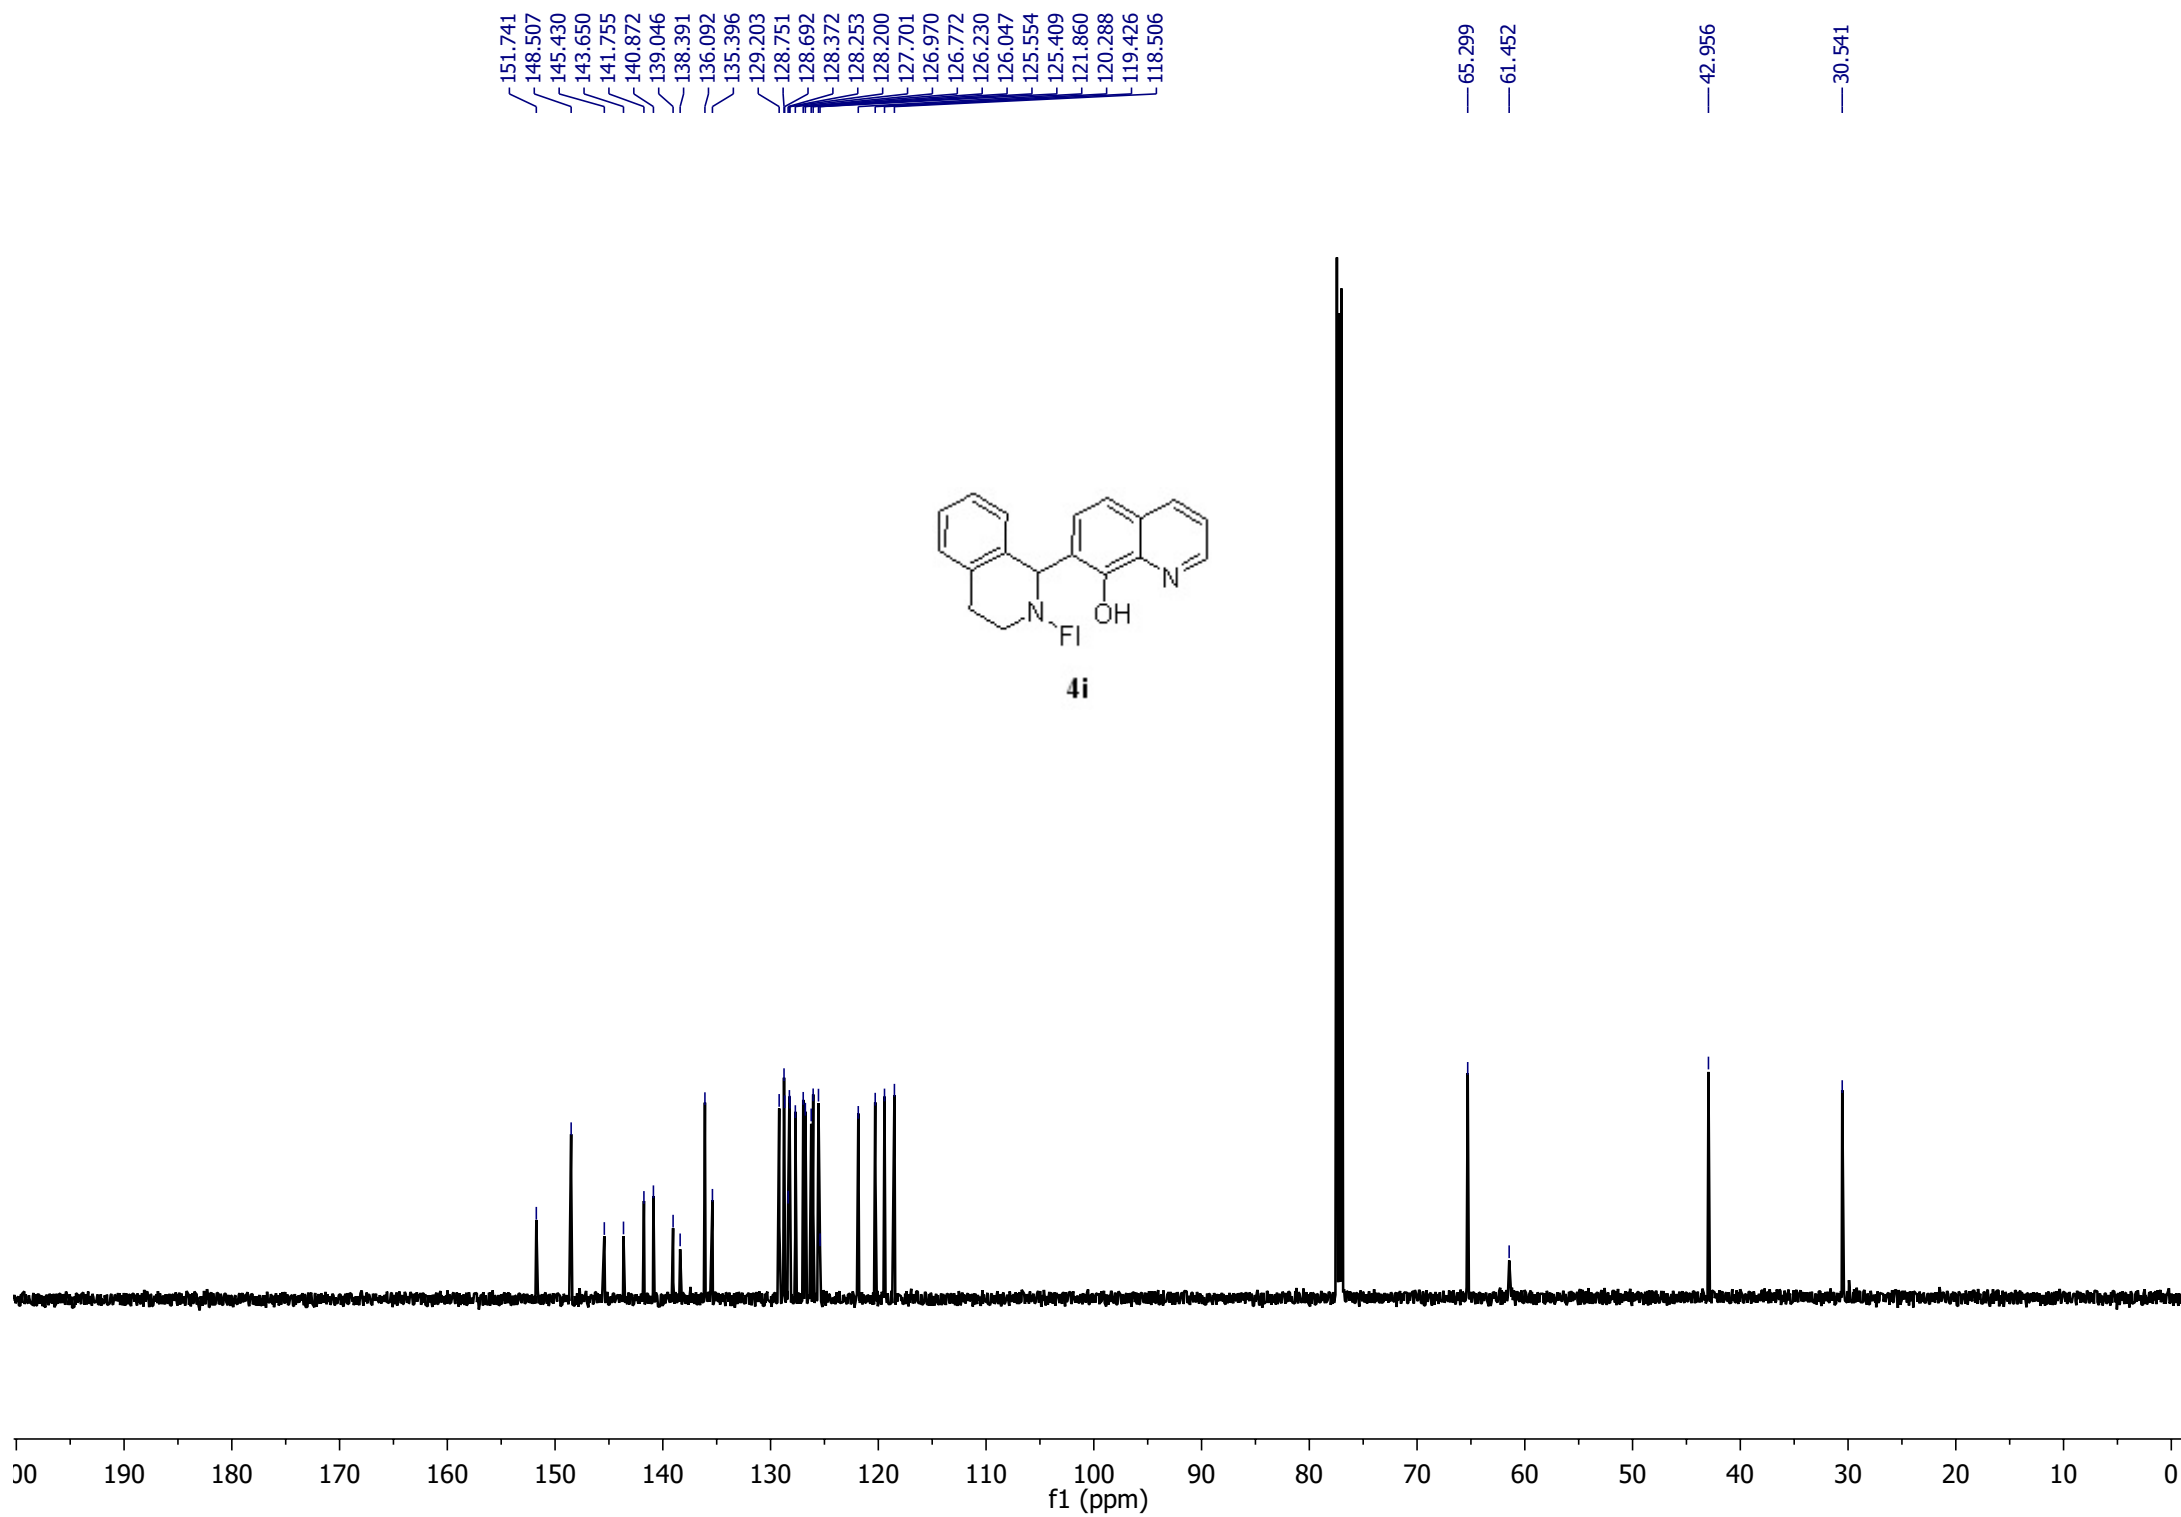

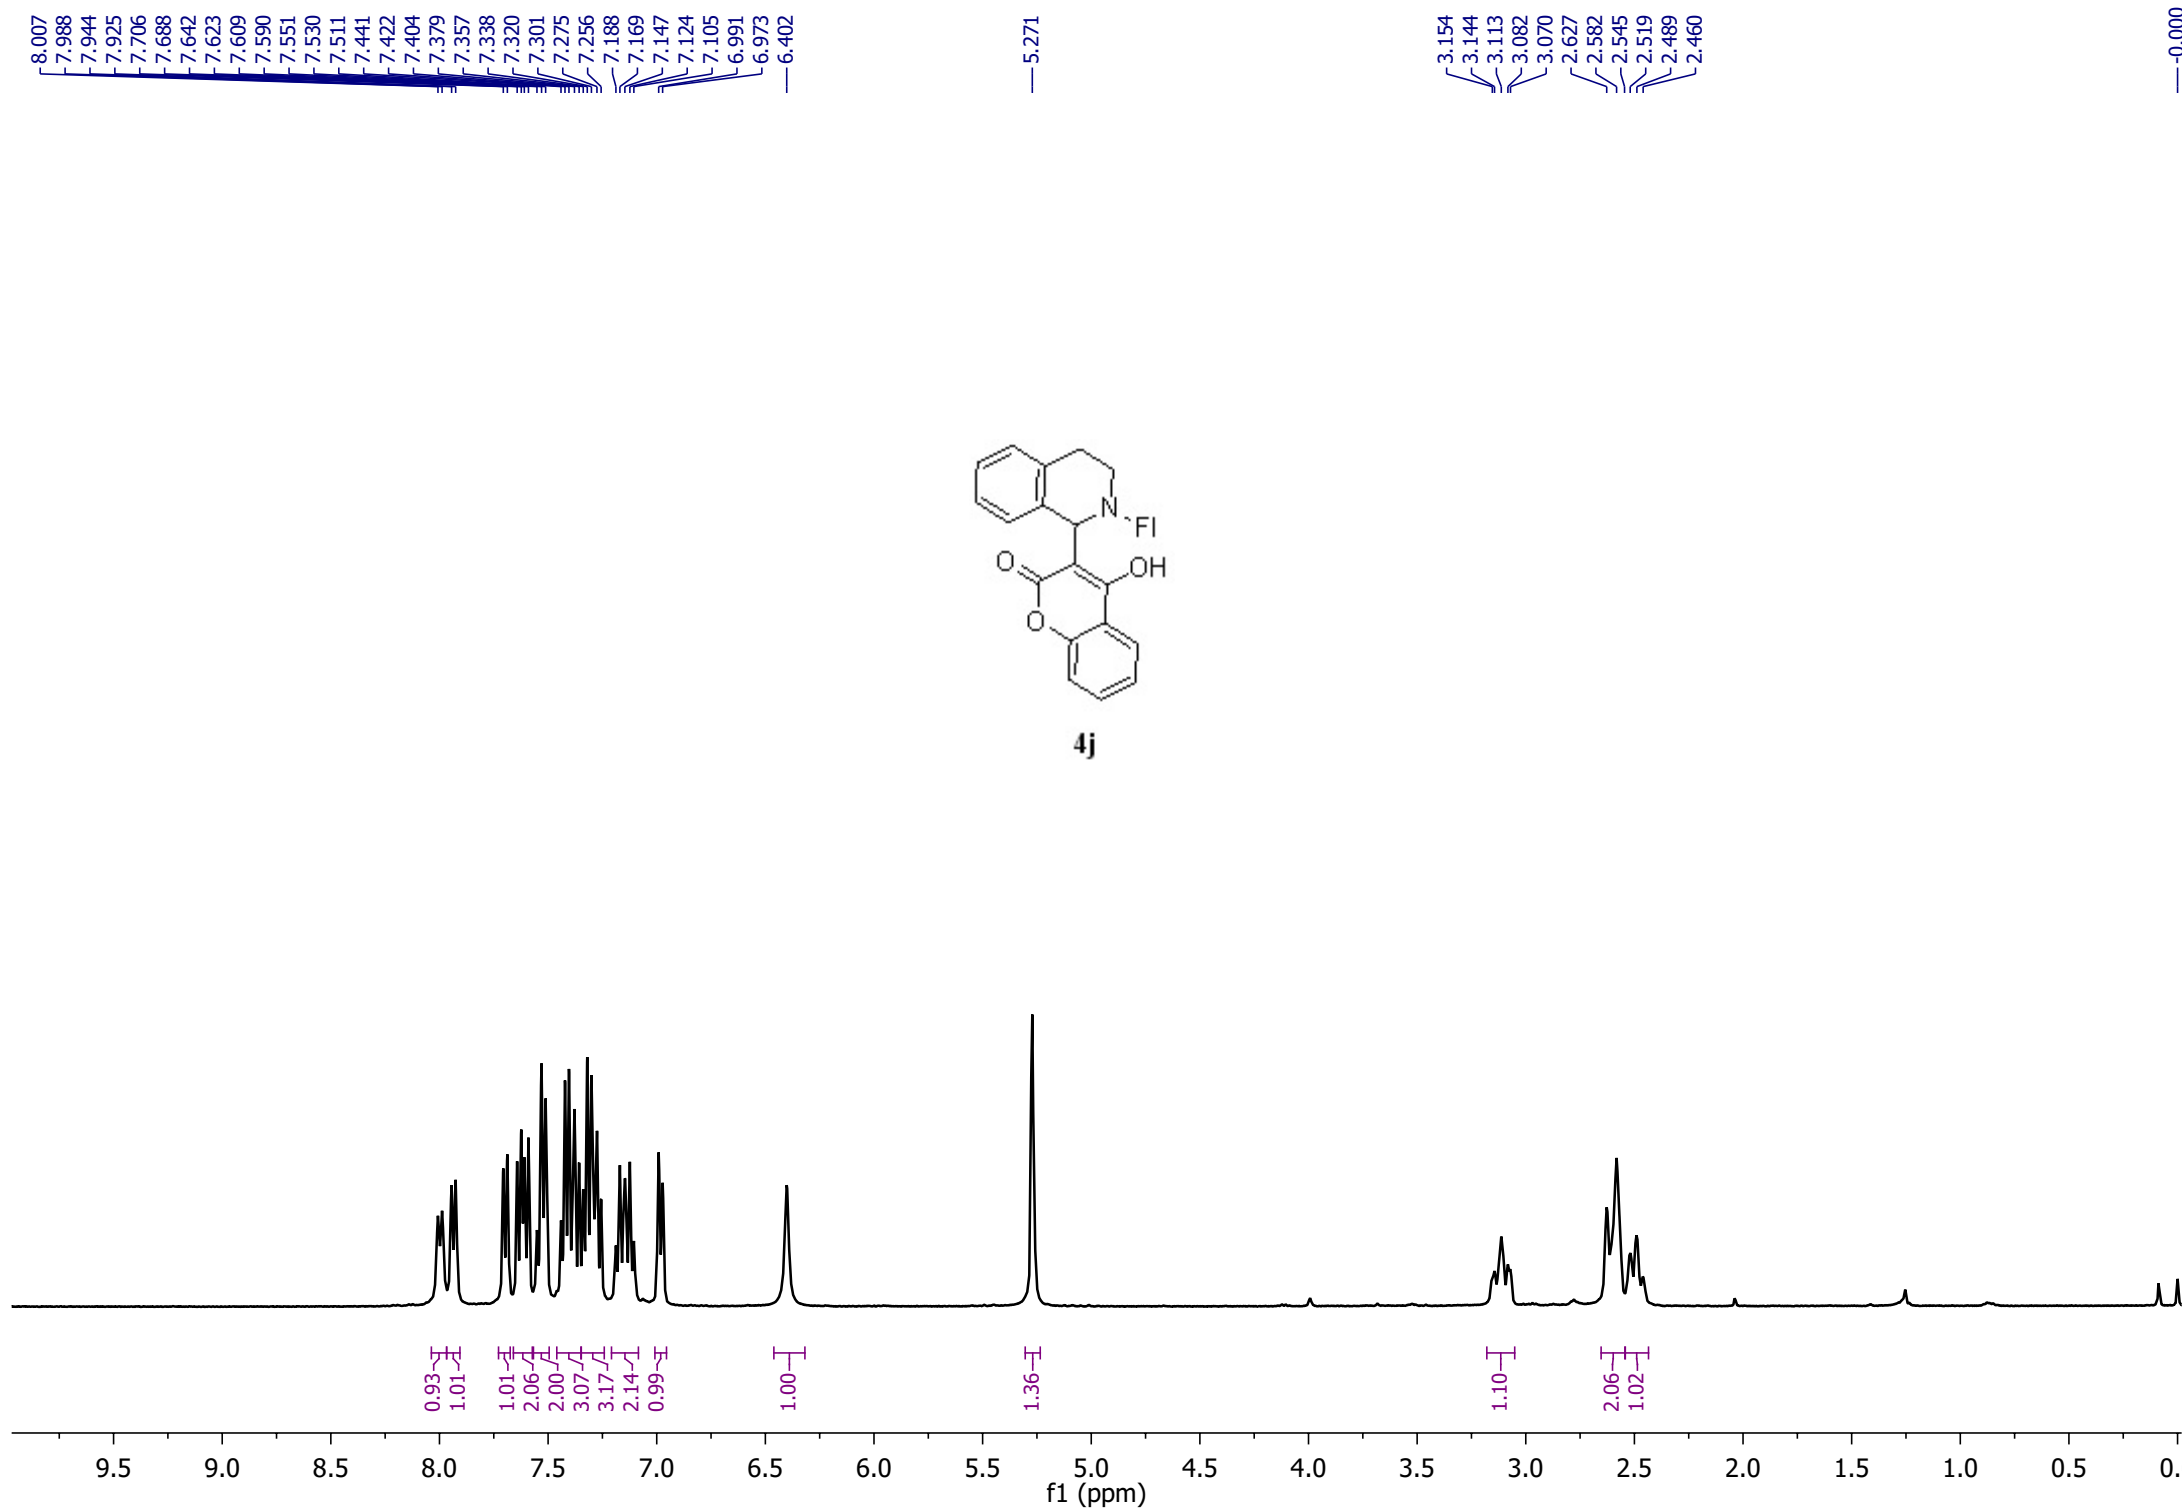

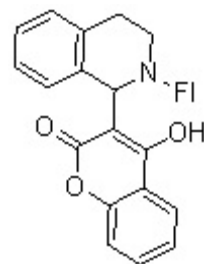

4j

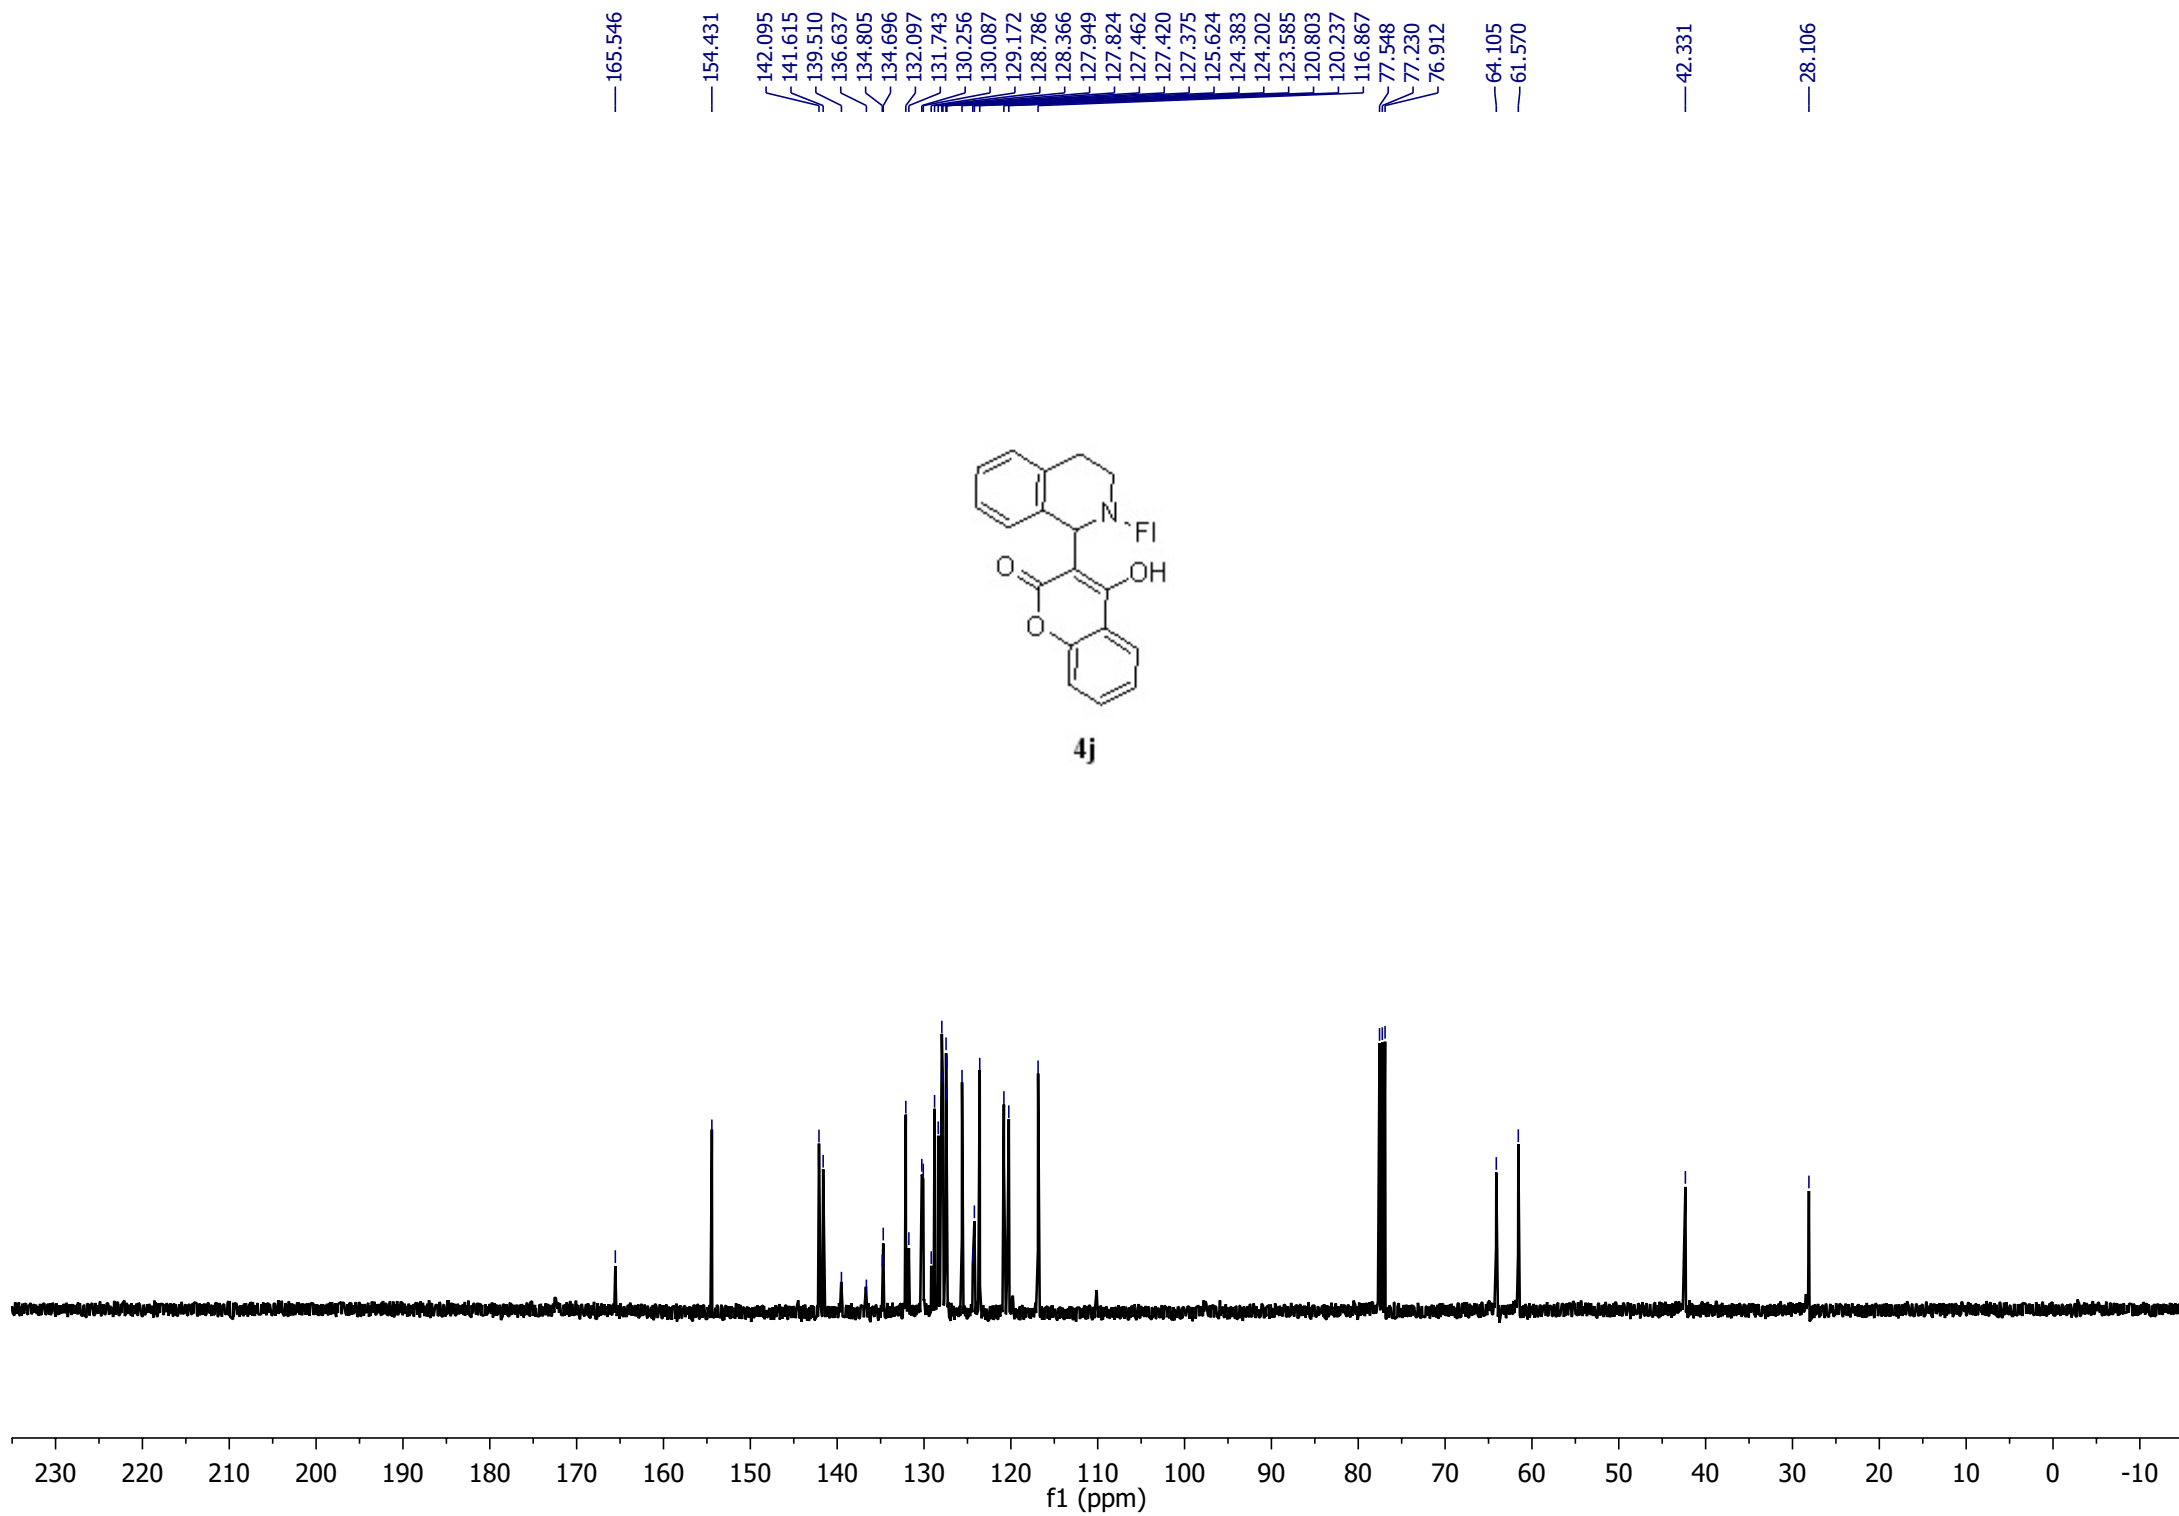

8.065  
7.777  
7.758  
7.692  
7.674  
7.609  
7.591  
7.475  
7.470  
7.413  
7.395  
7.348  
7.328  
7.305  
7.292  
7.274  
7.255  
7.240  
7.214  
7.182  
7.166  
7.133  
7.130  
7.077  
7.055  
6.940  
6.931  
5.919

5.070

3.116  
3.101  
3.073  
3.046  
3.031  
2.593  
2.565  
2.534  
2.526  
2.383  
2.368  
2.365  
2.350  
2.340

0.000

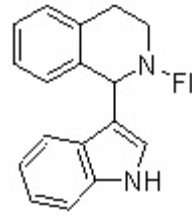

5a

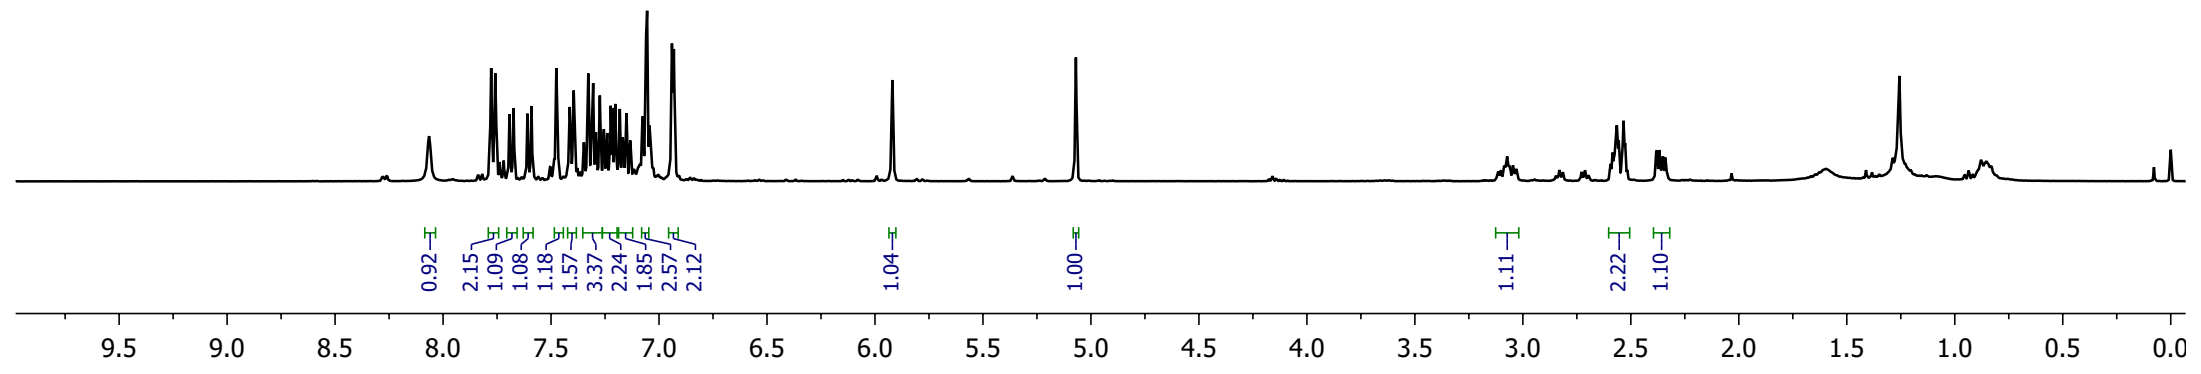

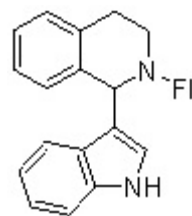

**5a**

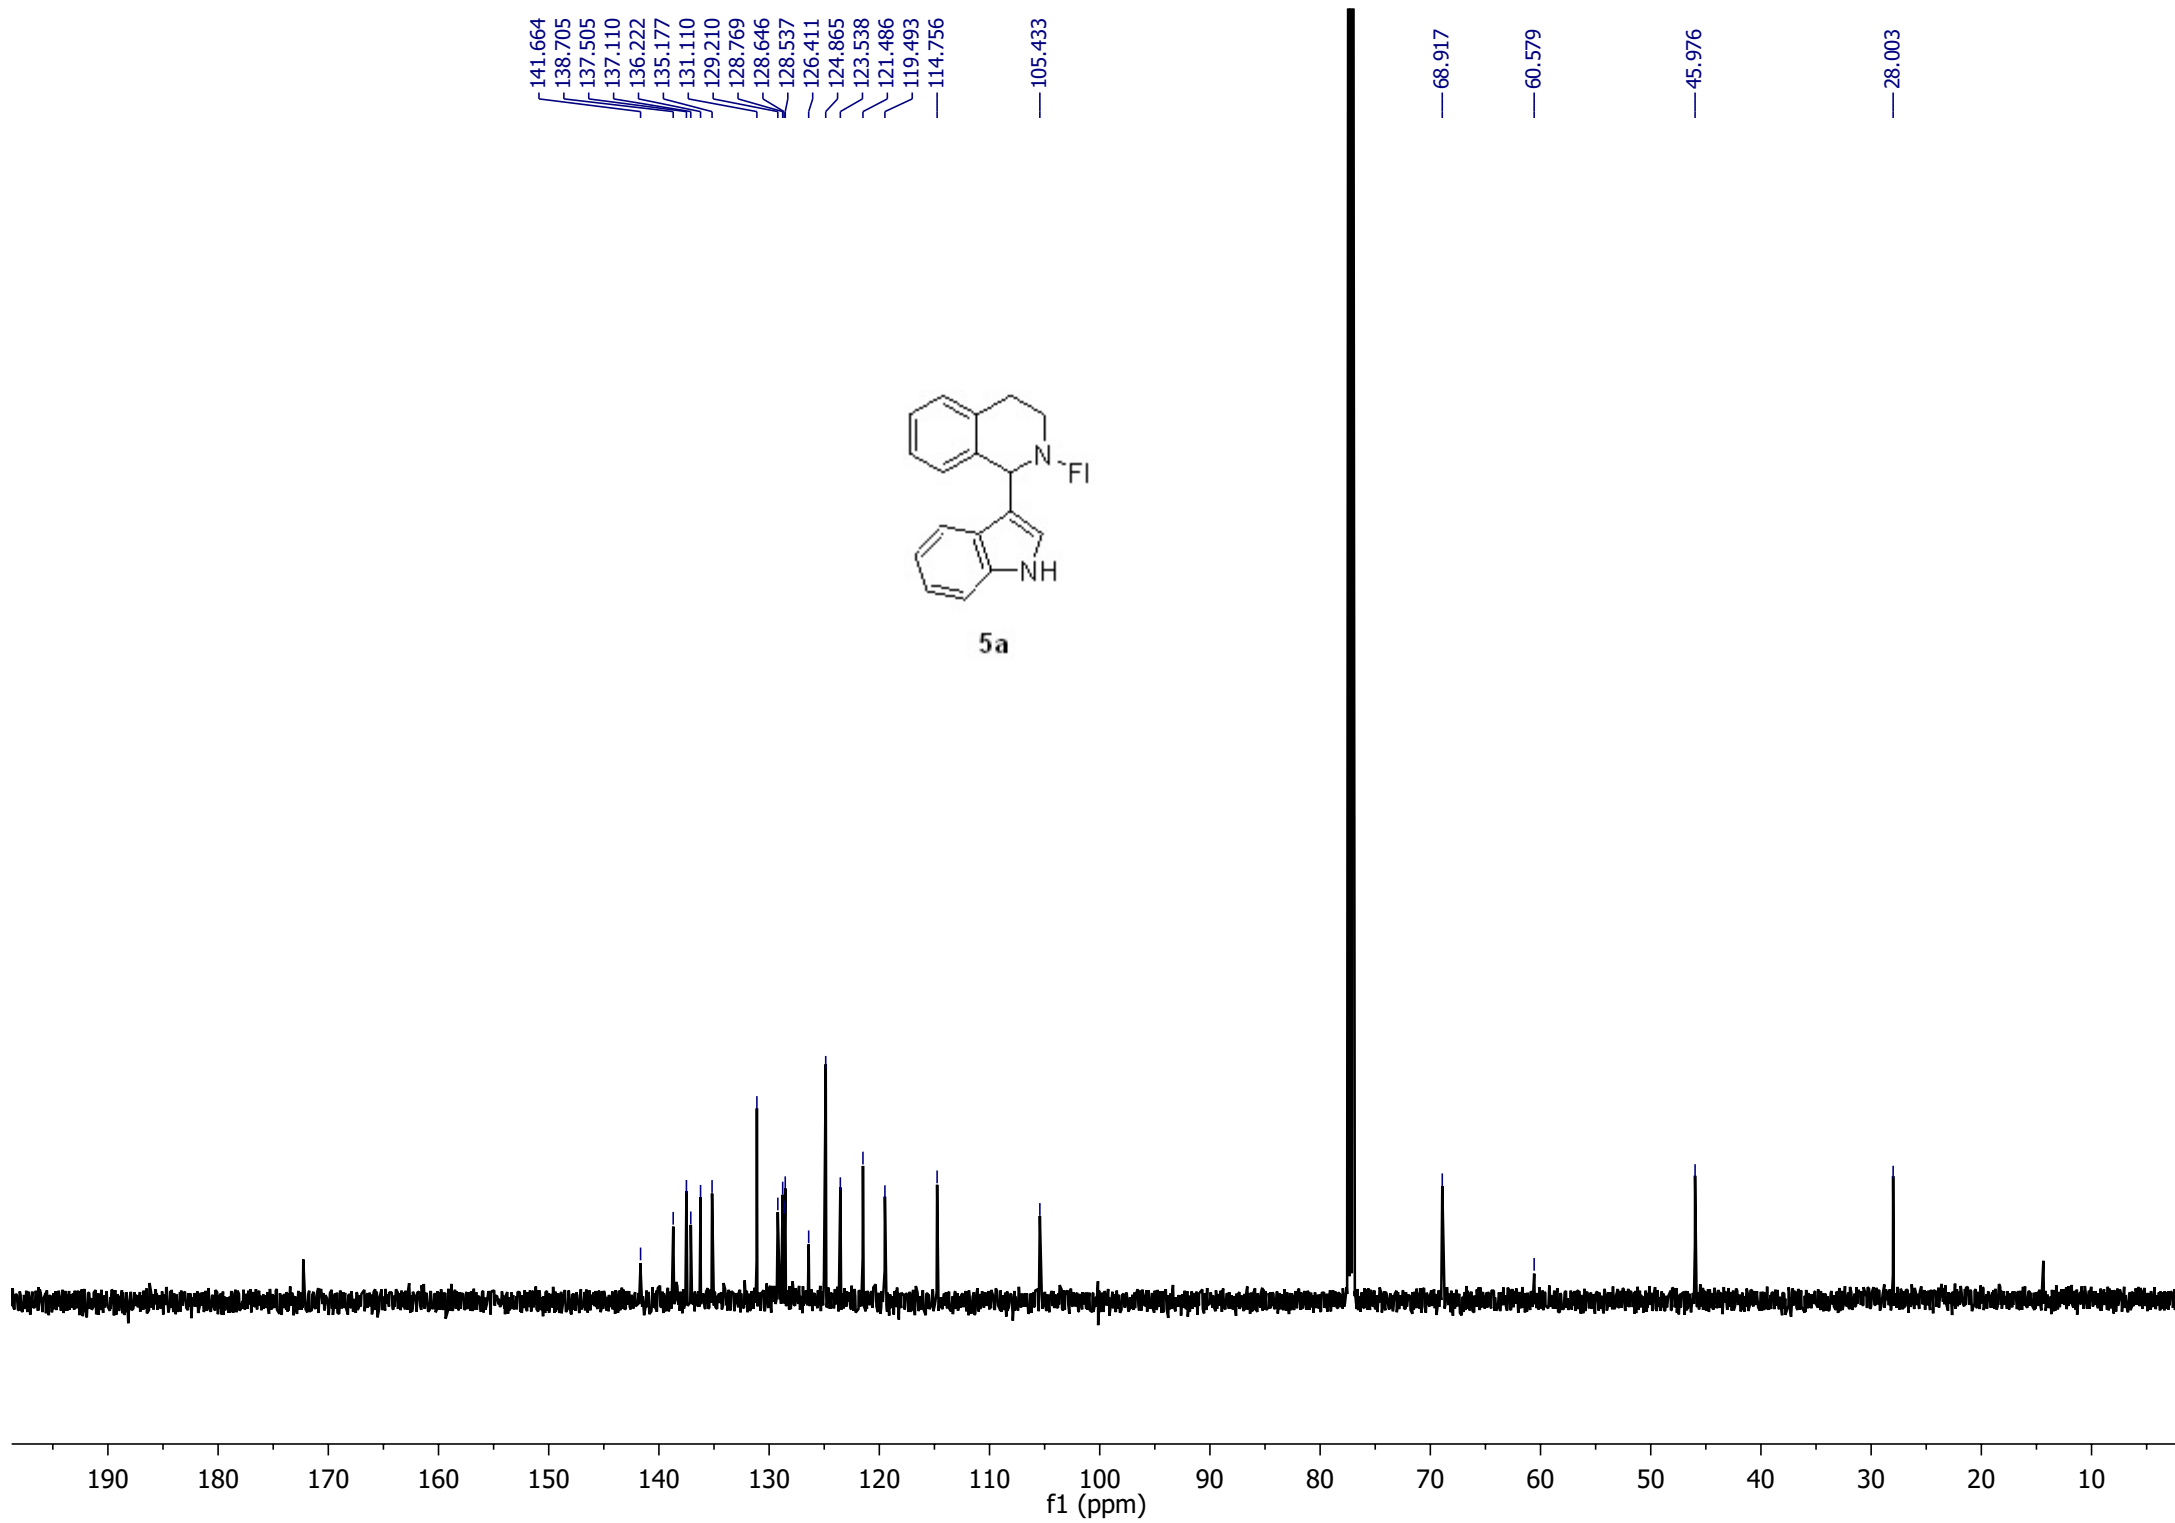

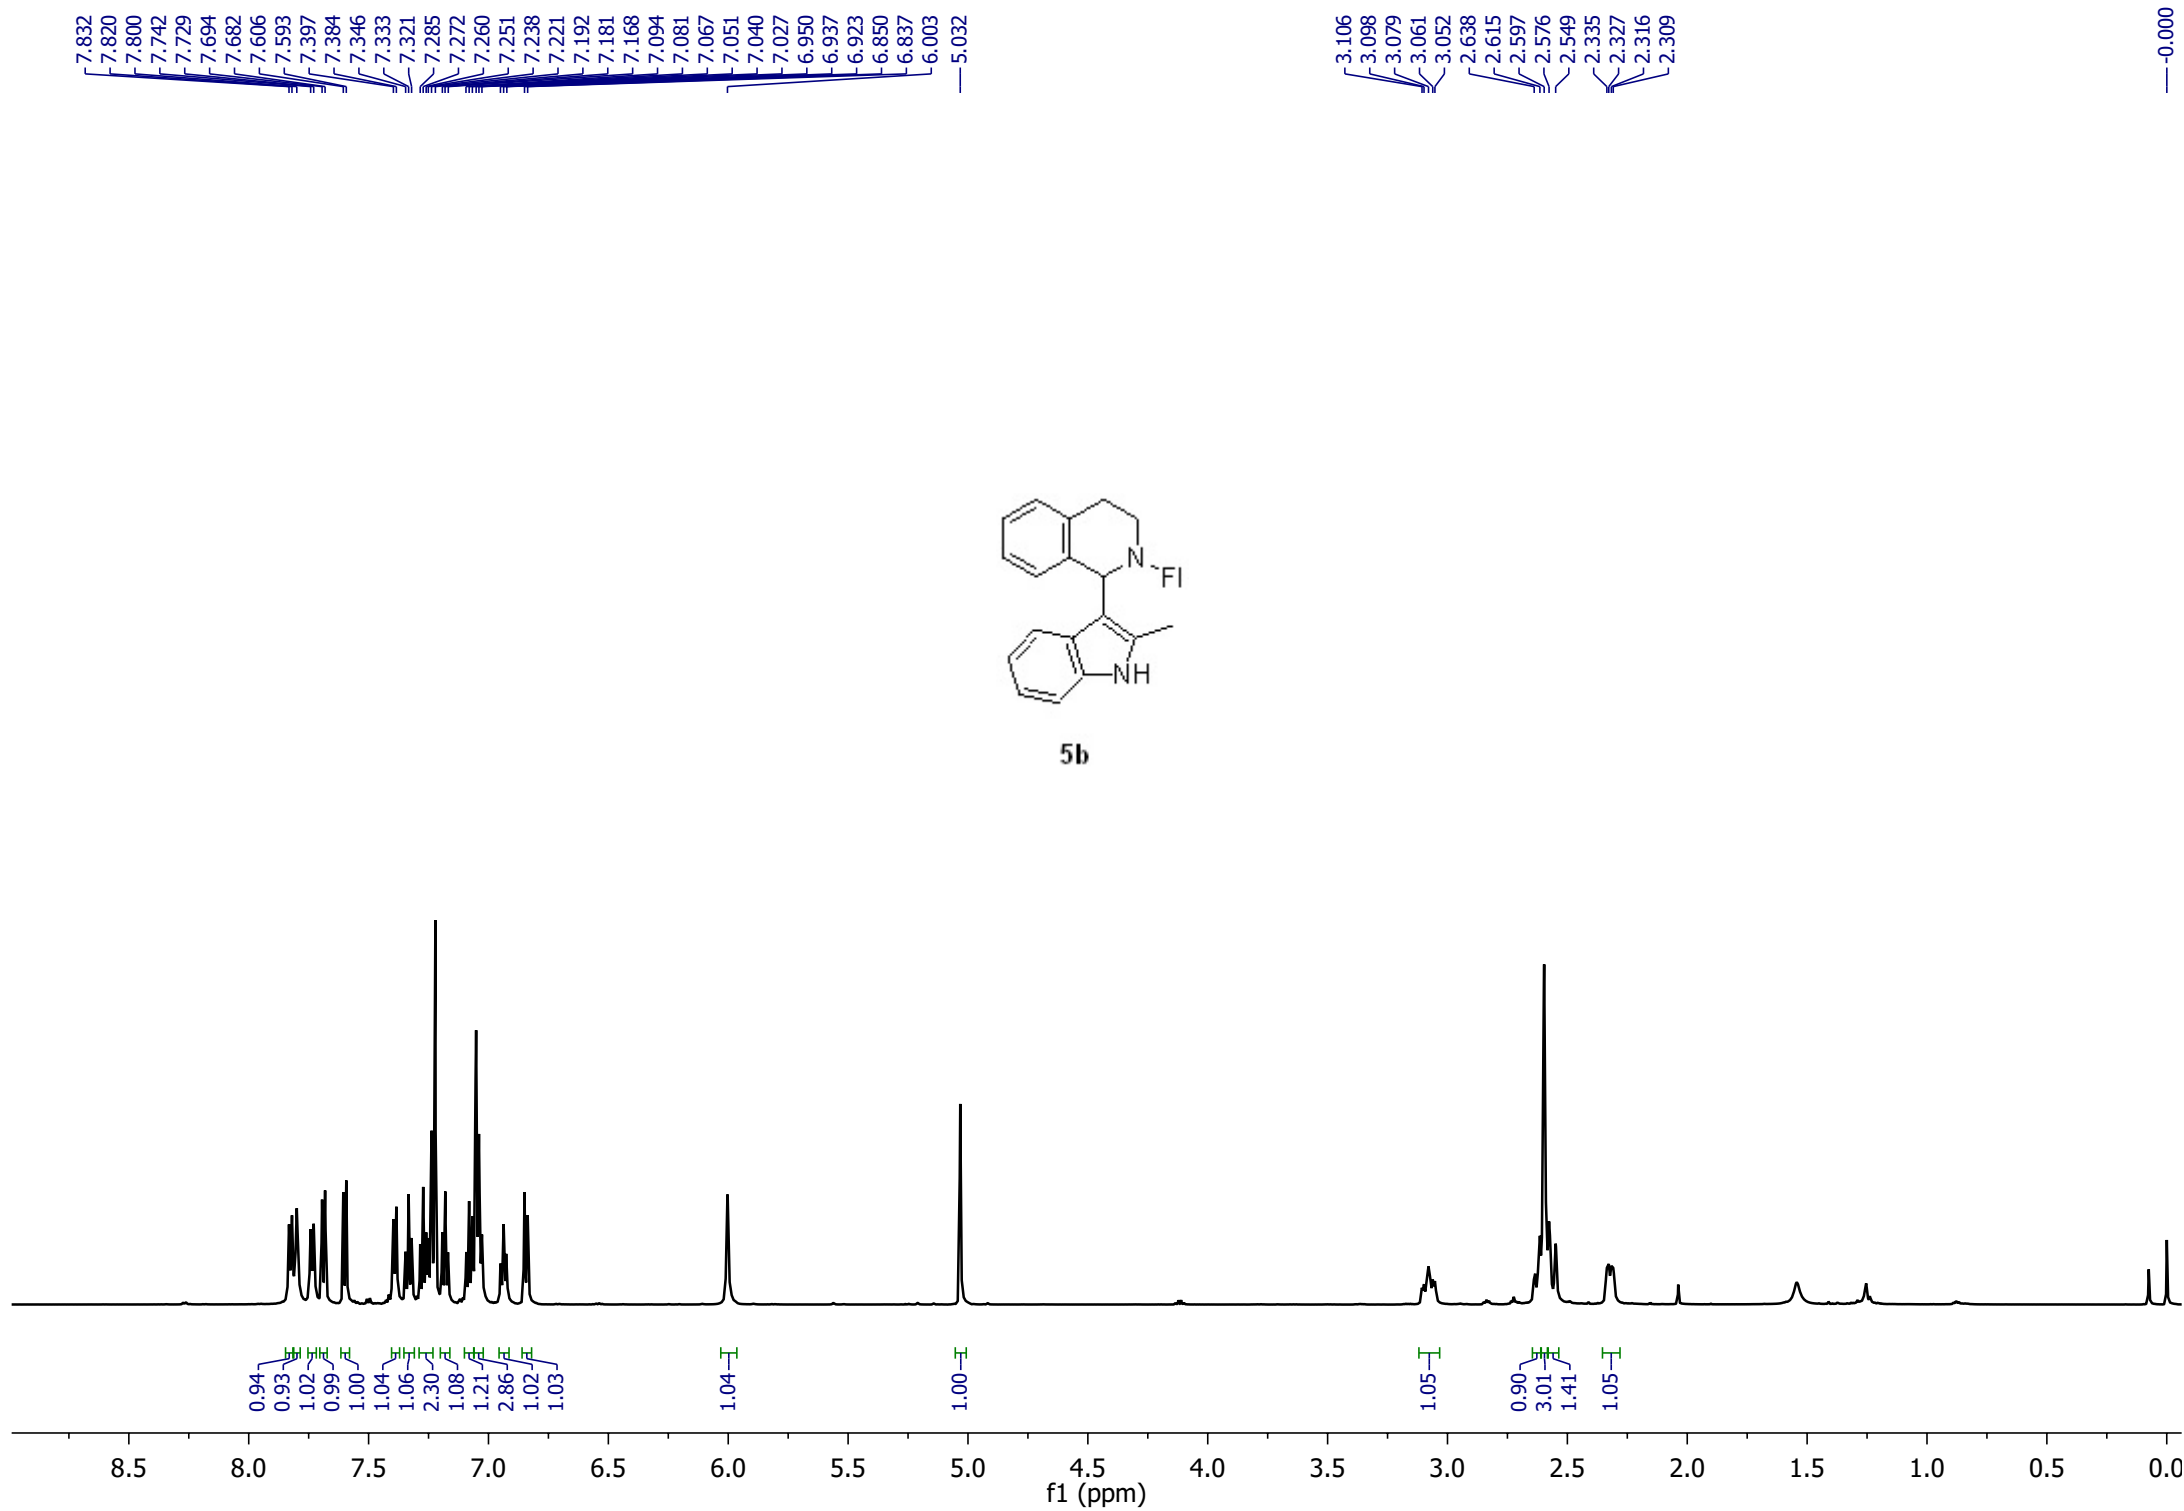

146.689  
144.890  
141.722  
140.553  
139.624  
135.854  
135.452  
133.928  
128.508  
128.100  
127.768  
127.492  
126.570  
125.999  
125.954  
125.857  
125.815  
121.420  
120.359  
119.503  
119.227  
113.950  
110.289

65.417

59.328

44.110

30.876

12.694

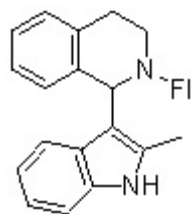

**5b**

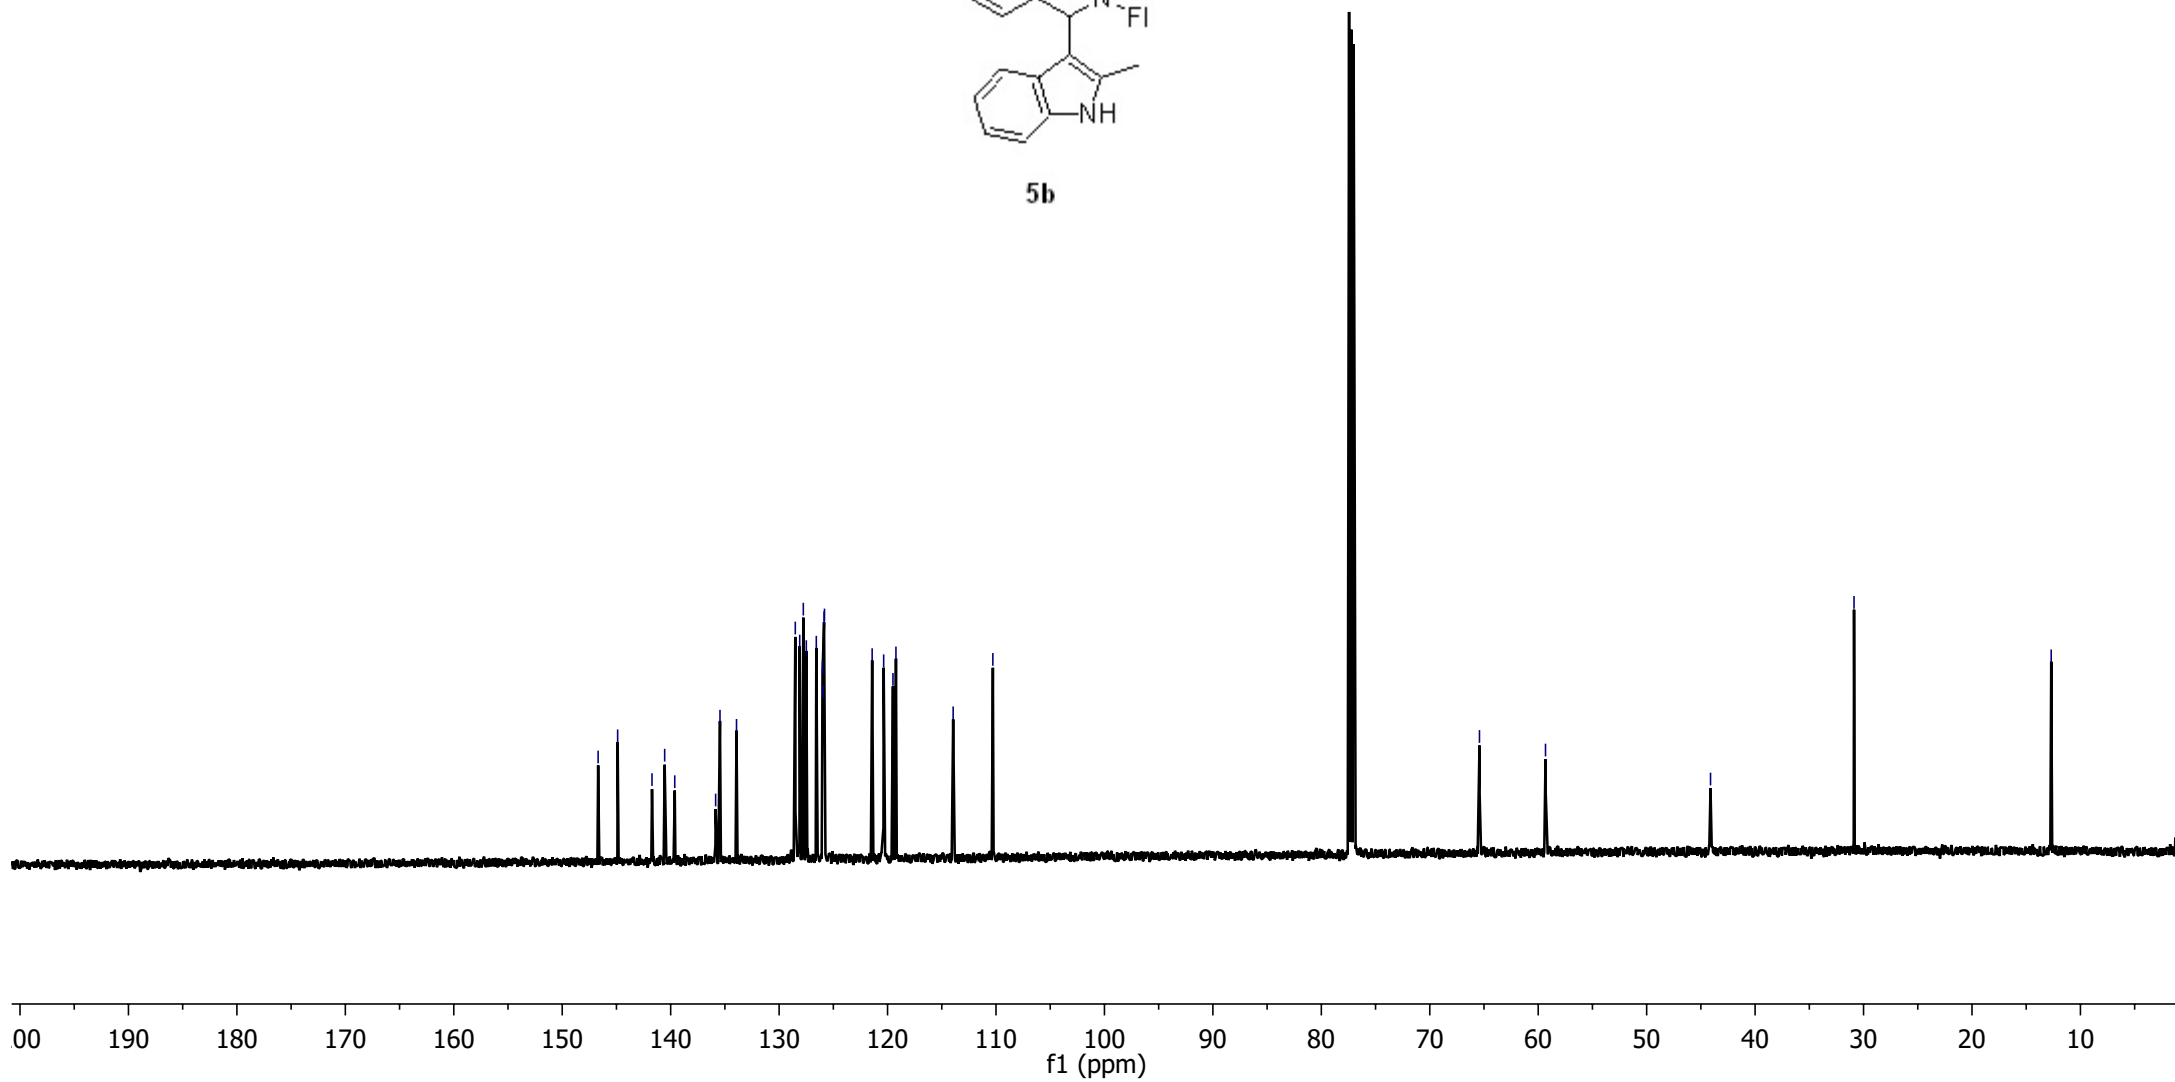

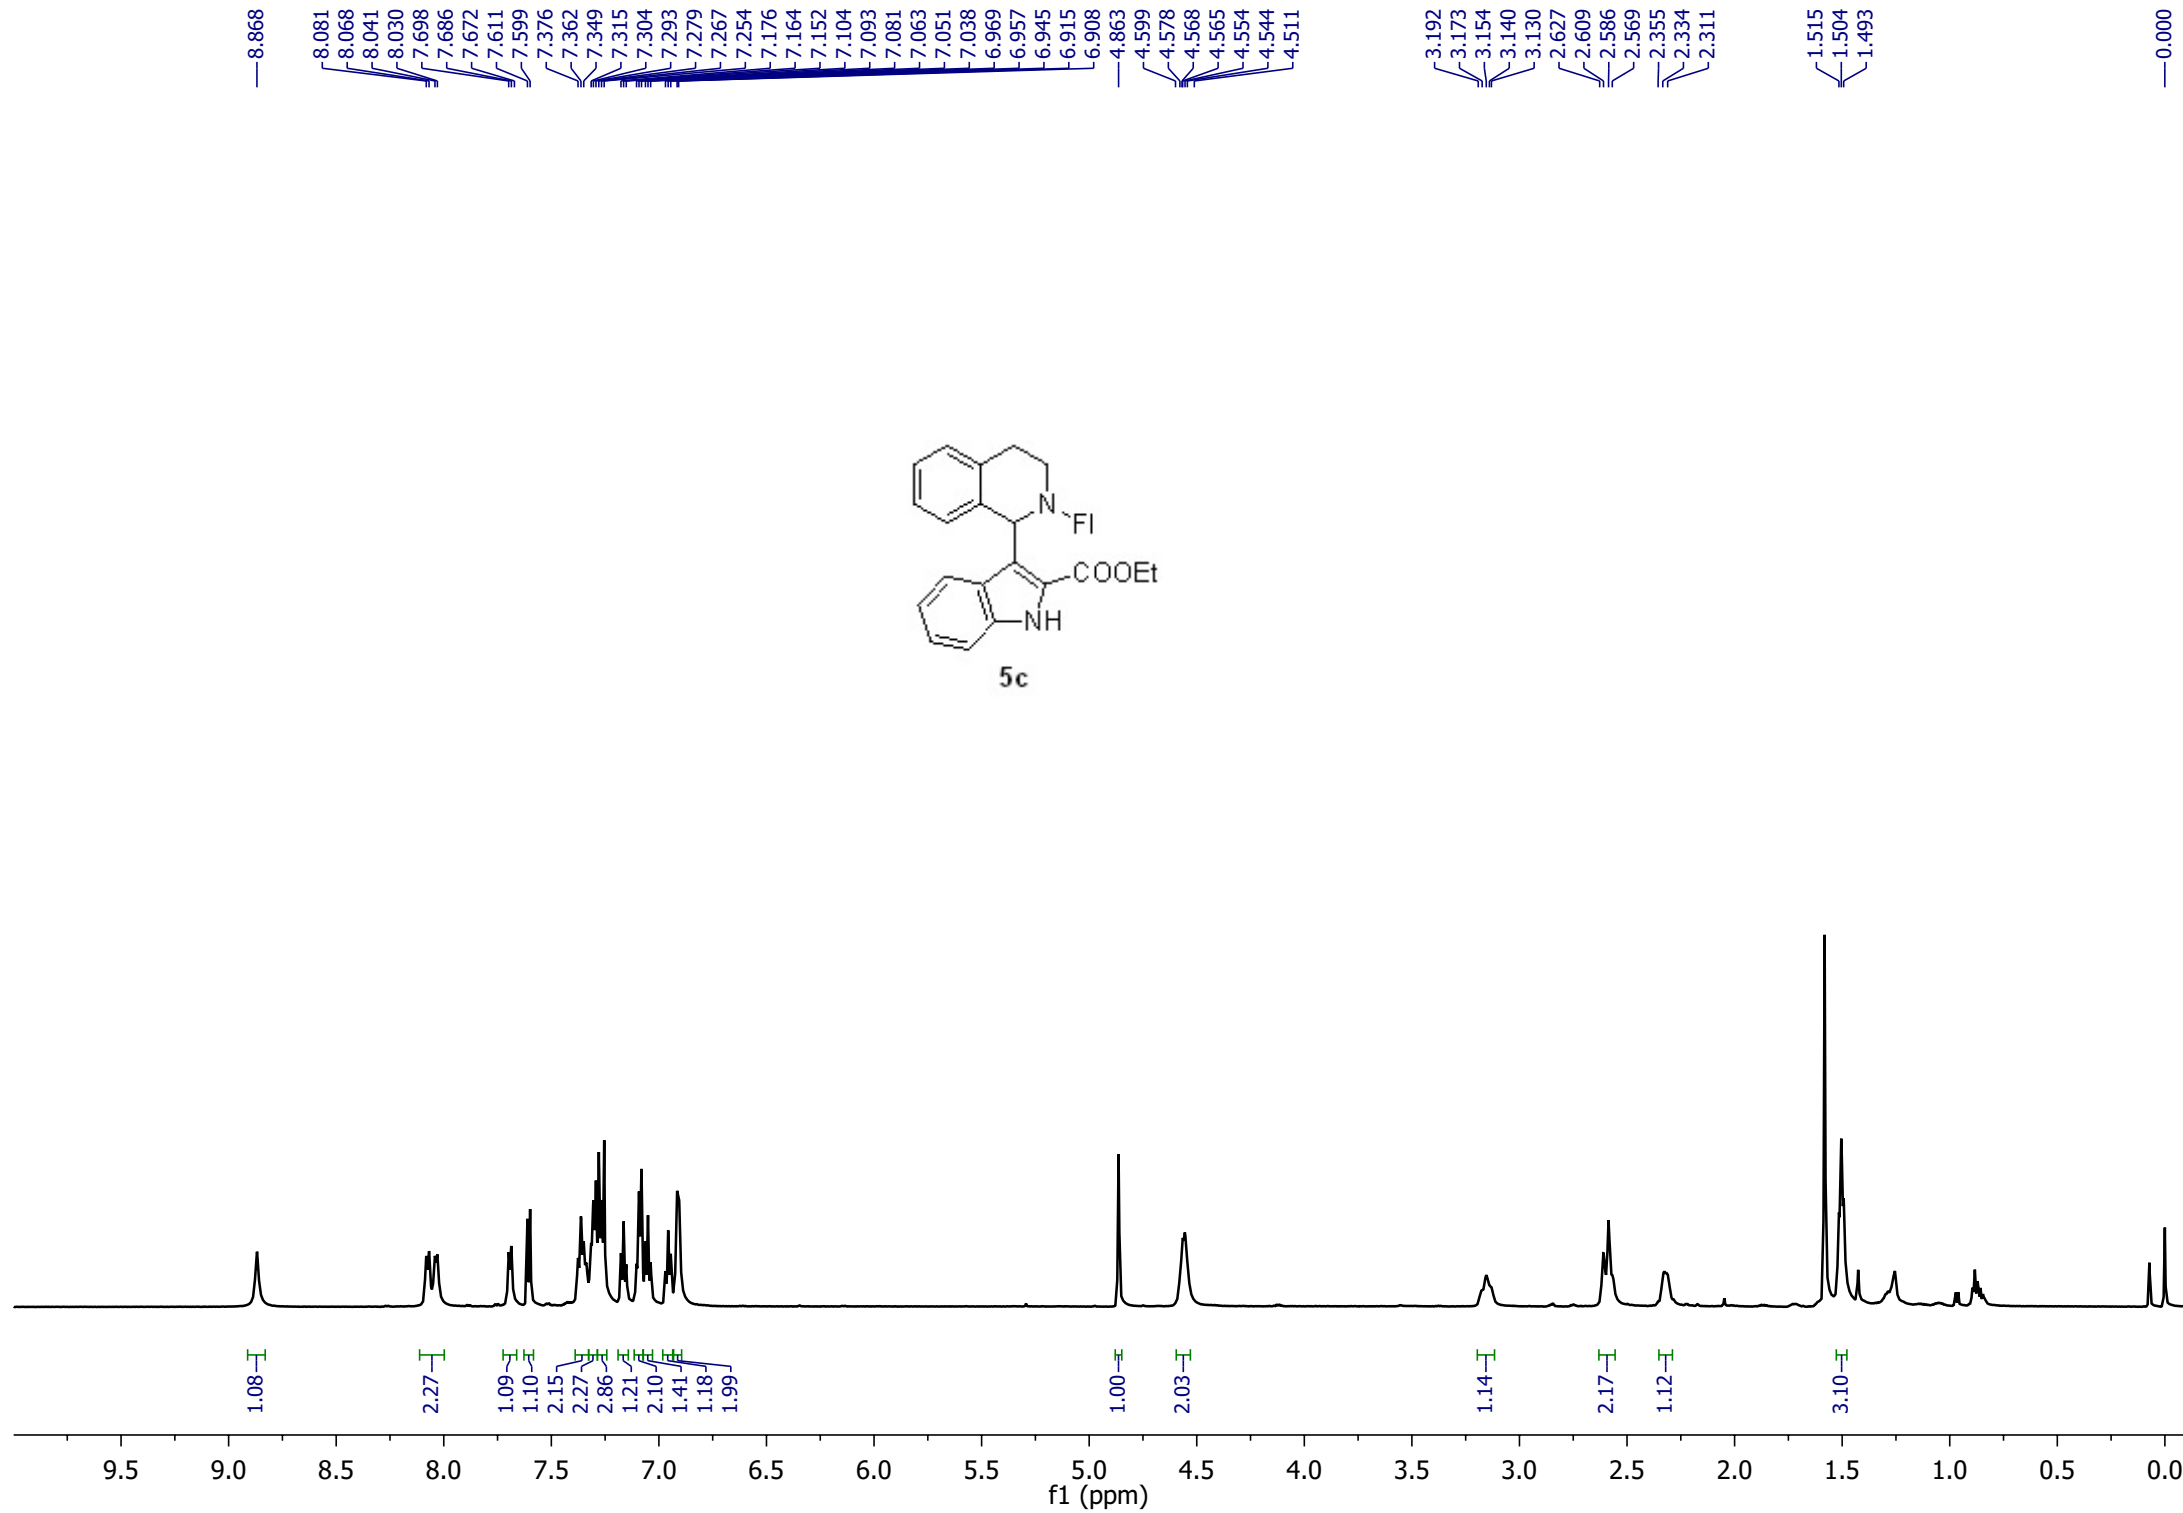

162.533  
146.344  
144.257  
141.679  
140.700  
138.544  
136.775  
135.105  
128.727  
128.138  
127.861  
127.451  
126.640  
126.570  
126.110  
126.077  
126.008  
125.914  
125.883  
124.731  
120.193  
119.209  
111.794

77.441  
77.230  
77.018

65.856  
61.554  
58.780

43.445

30.865

14.752

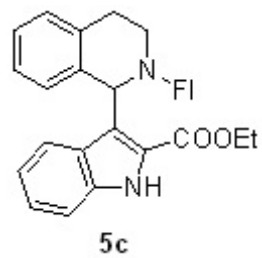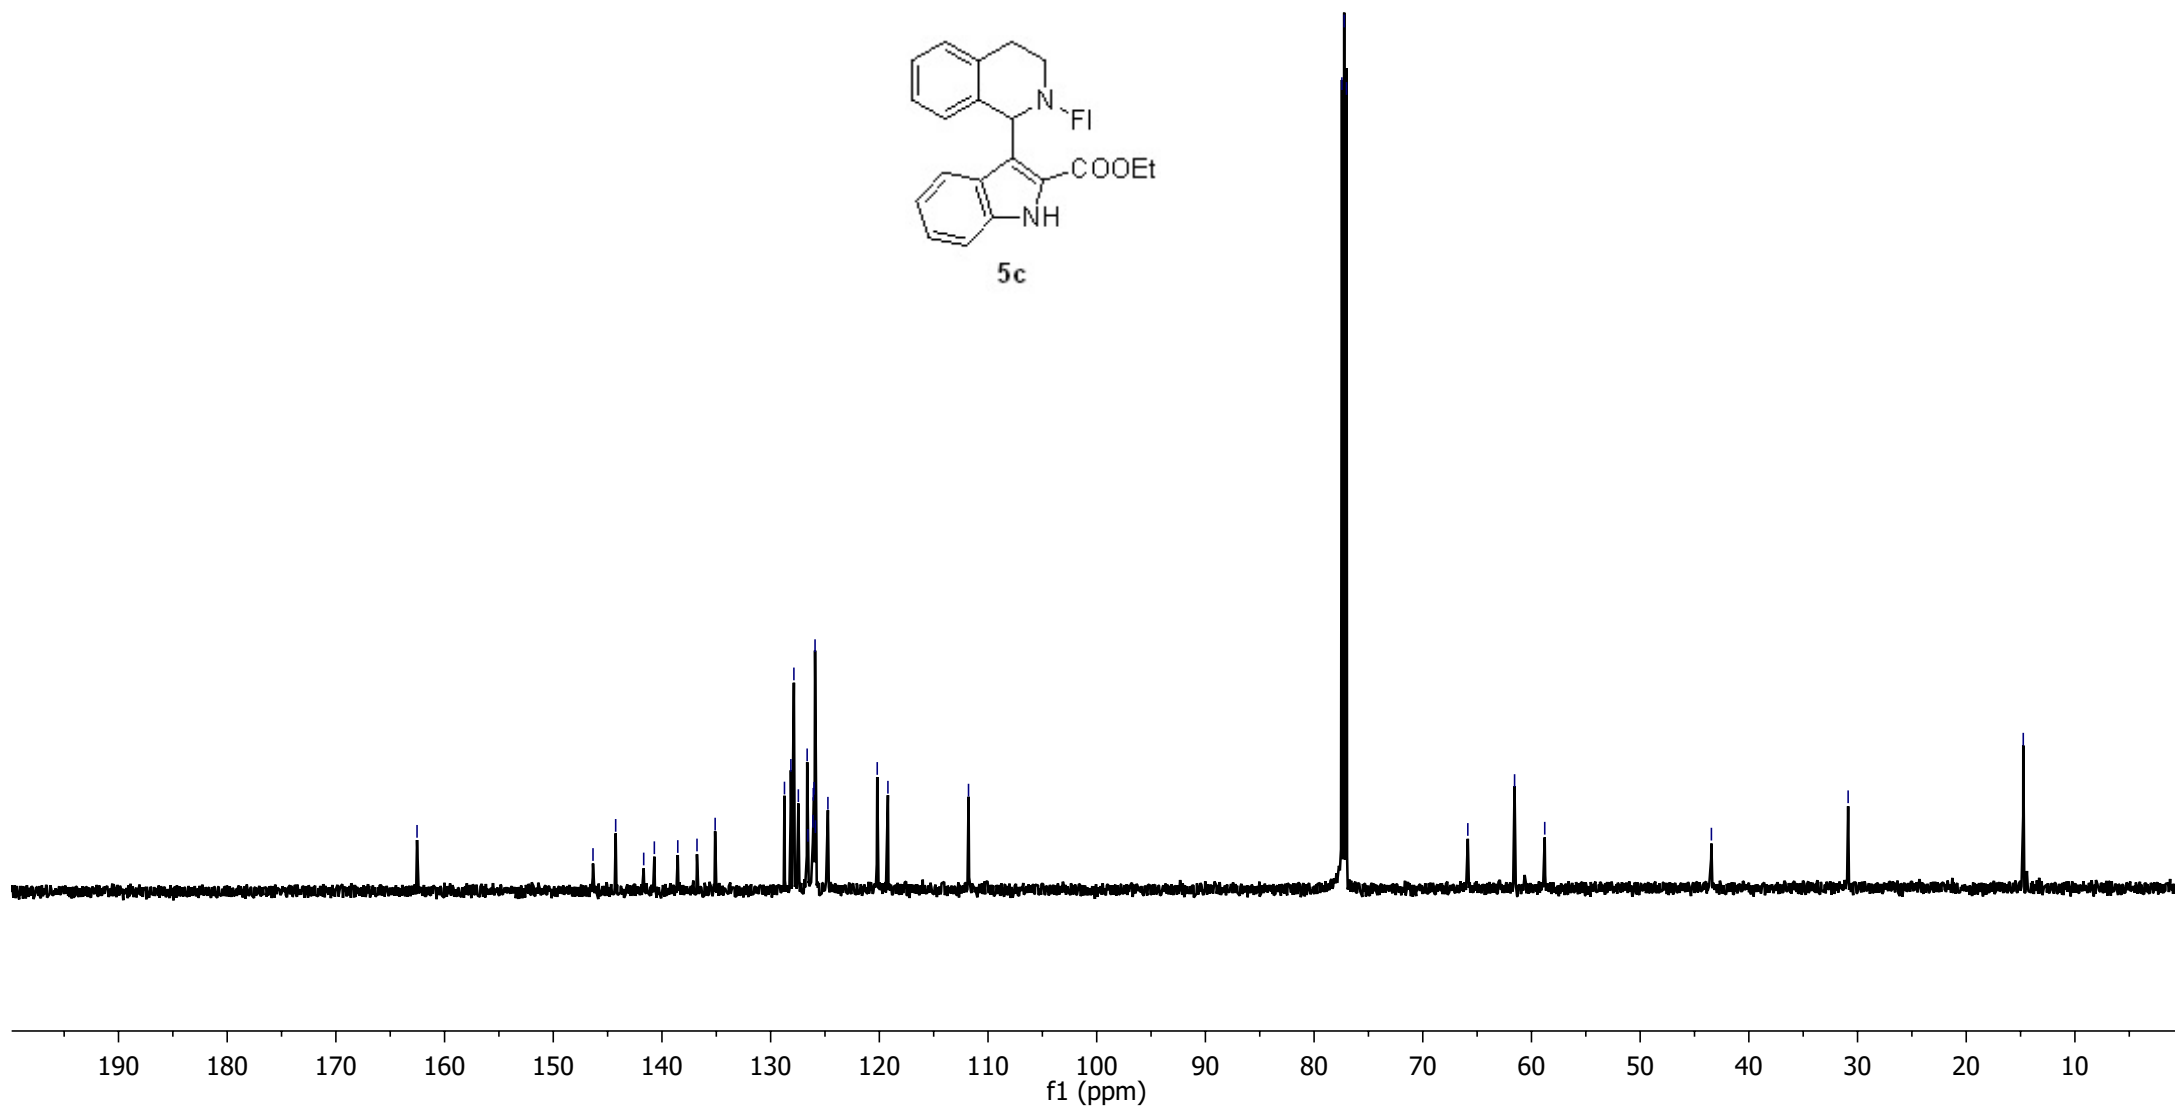

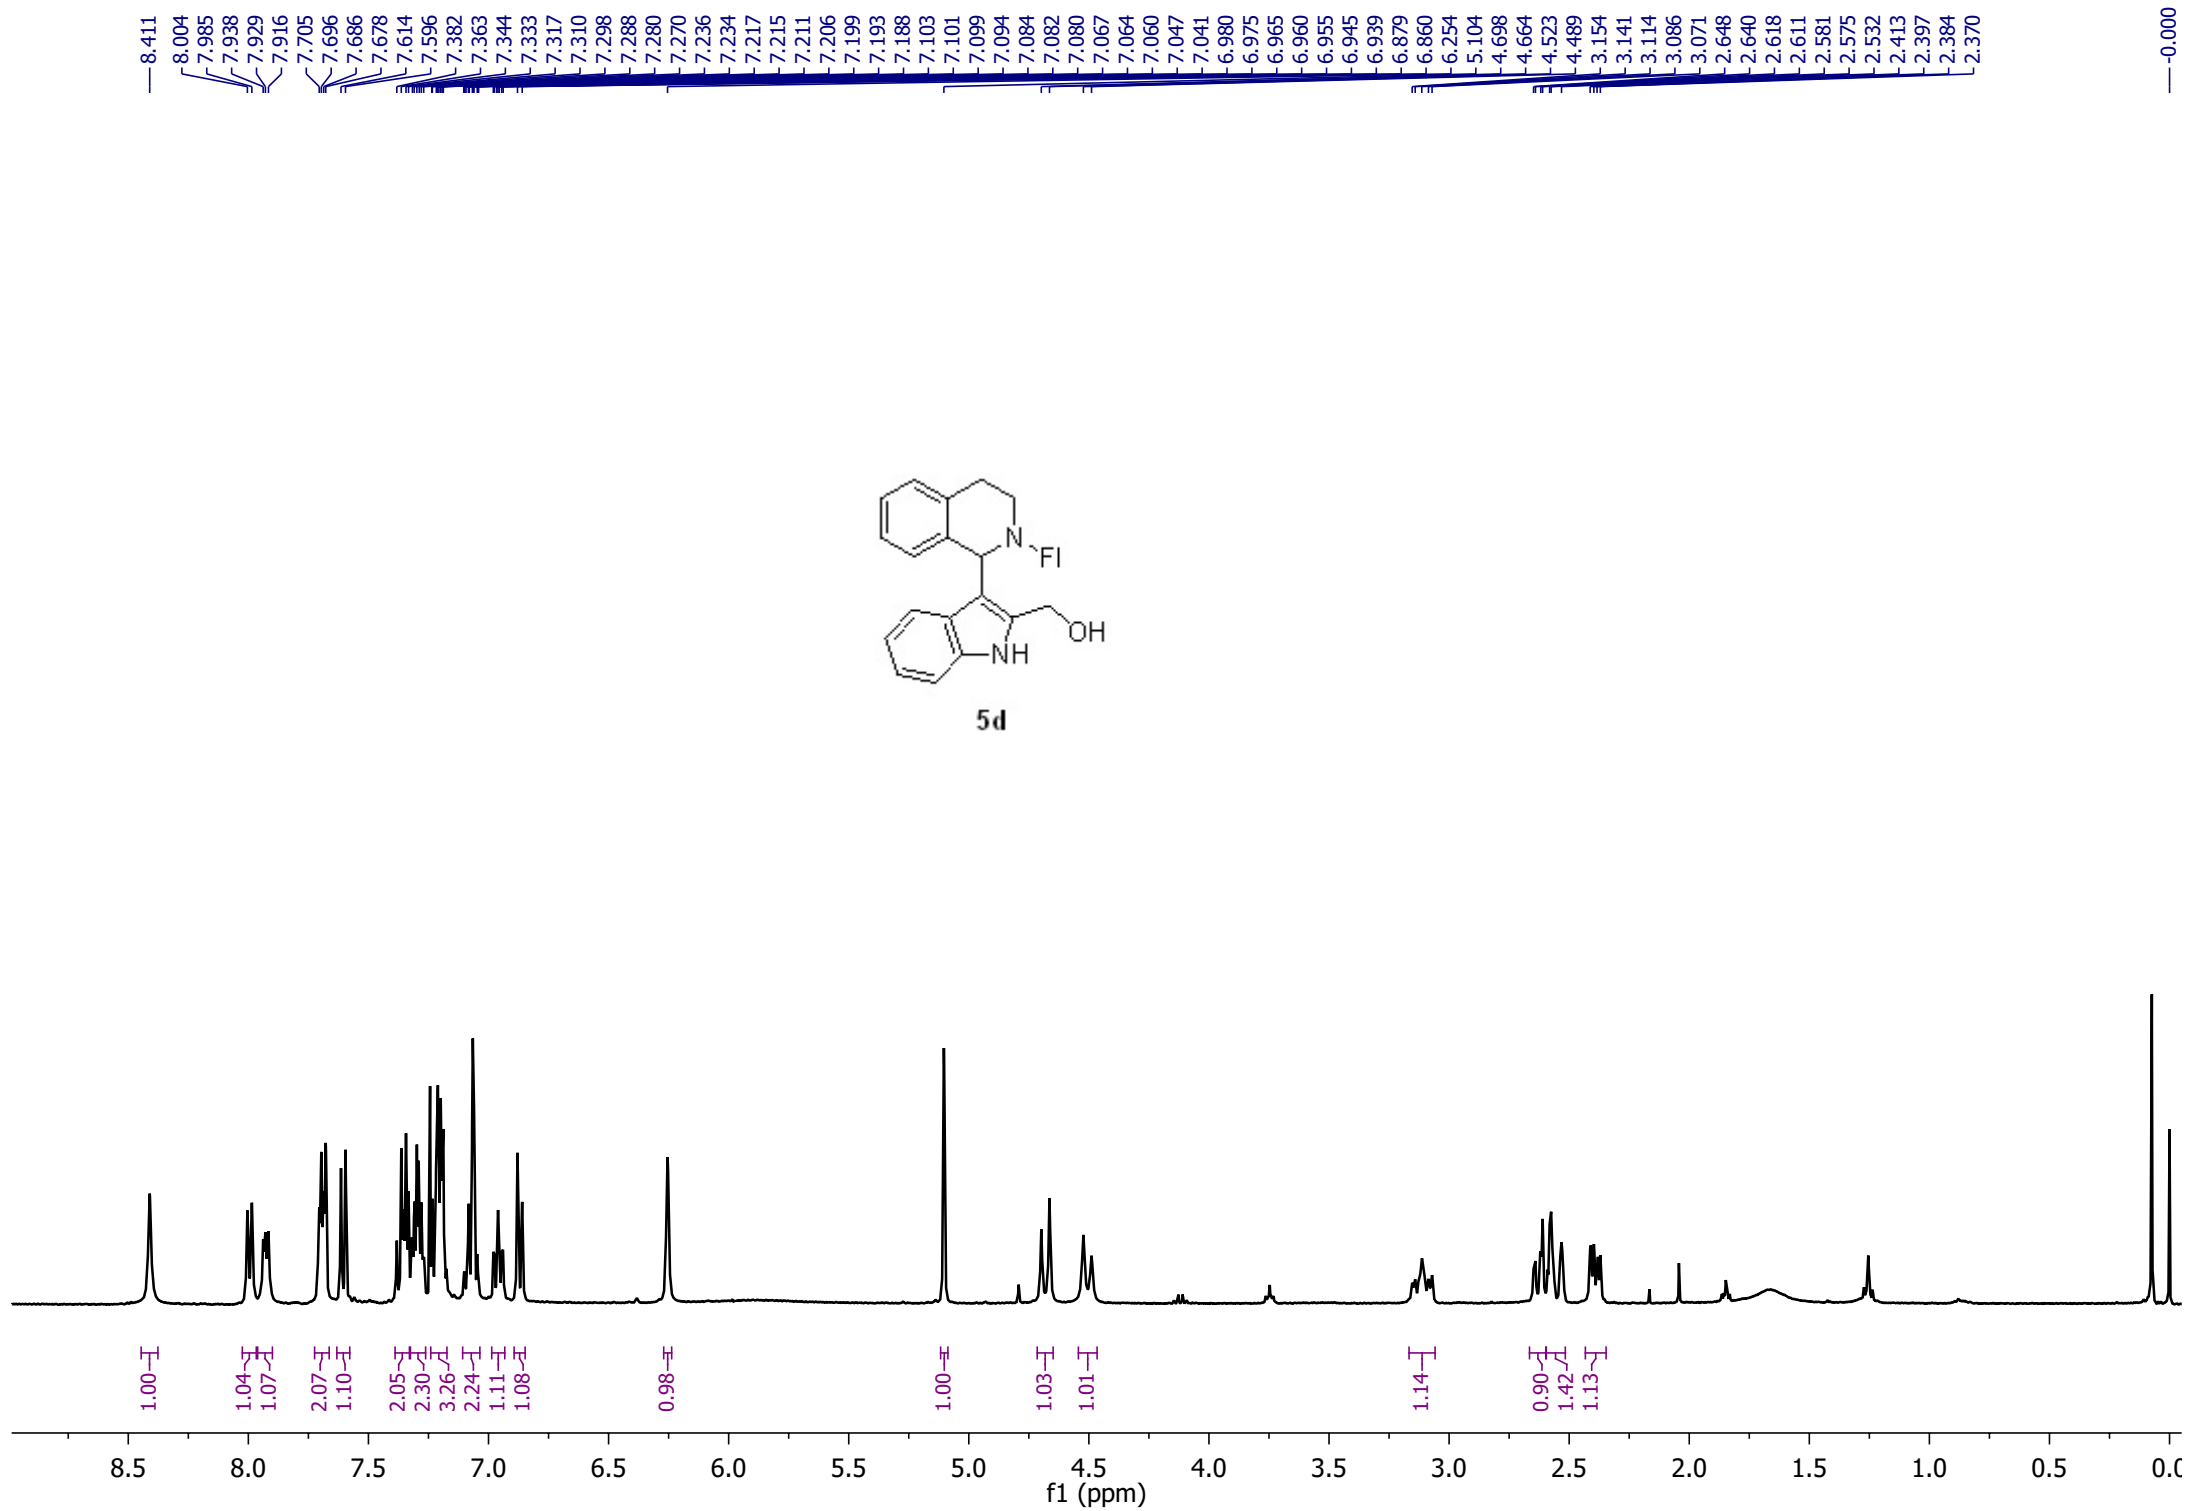

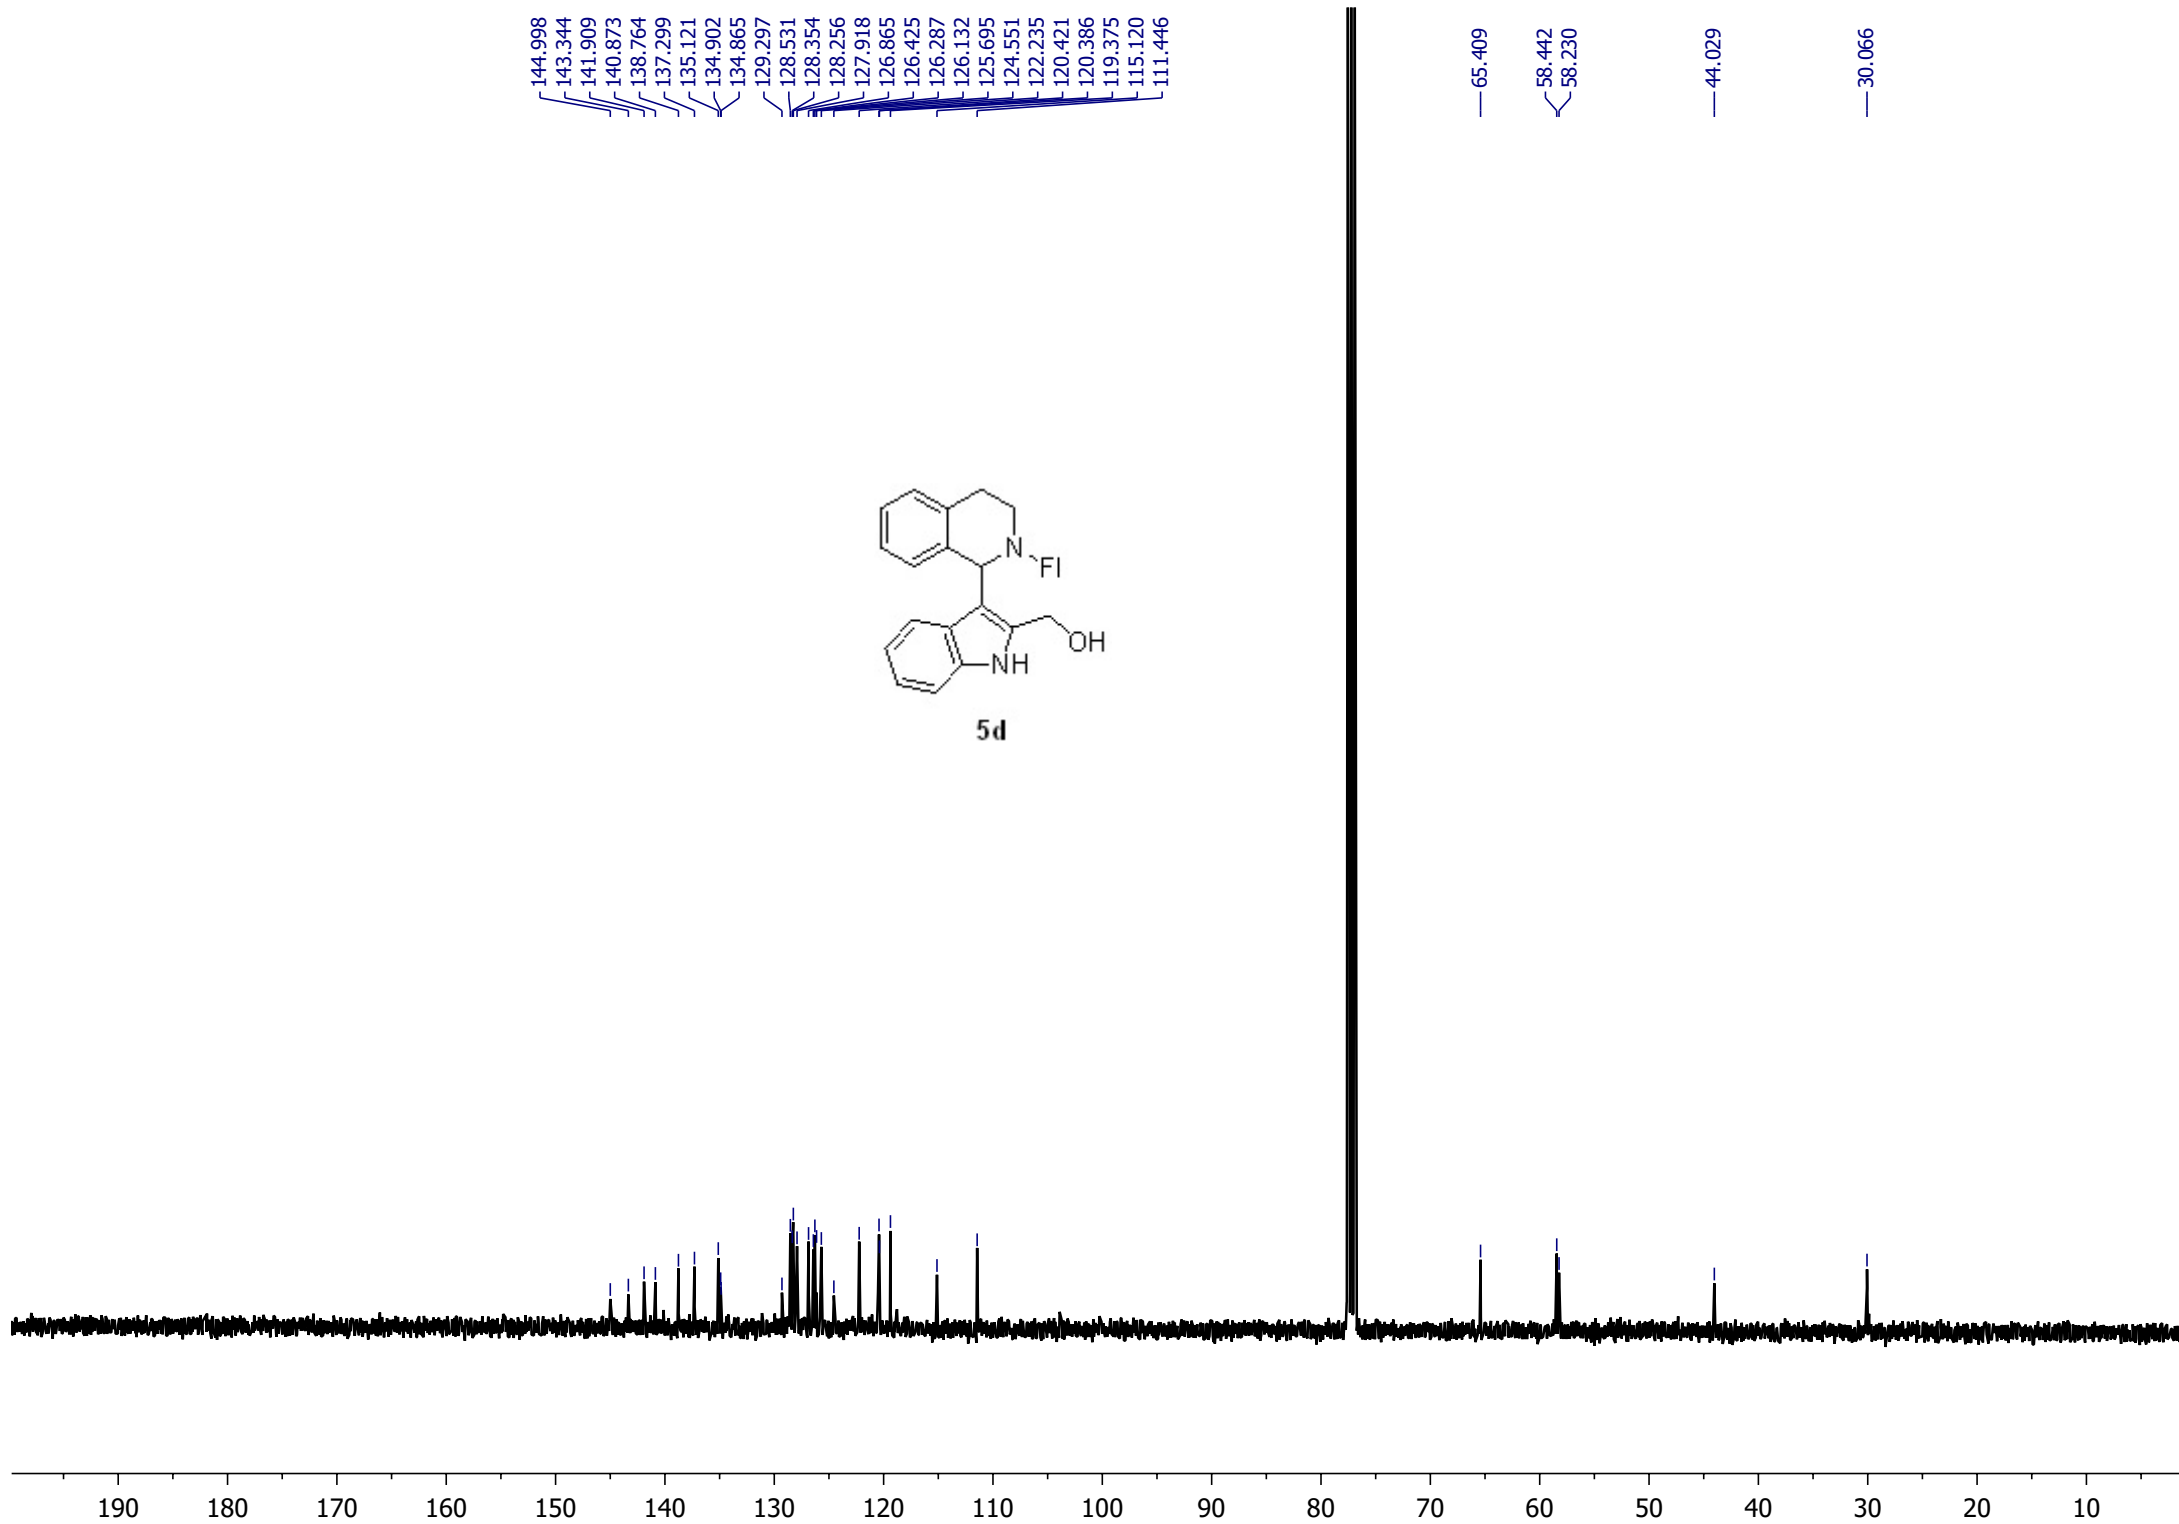

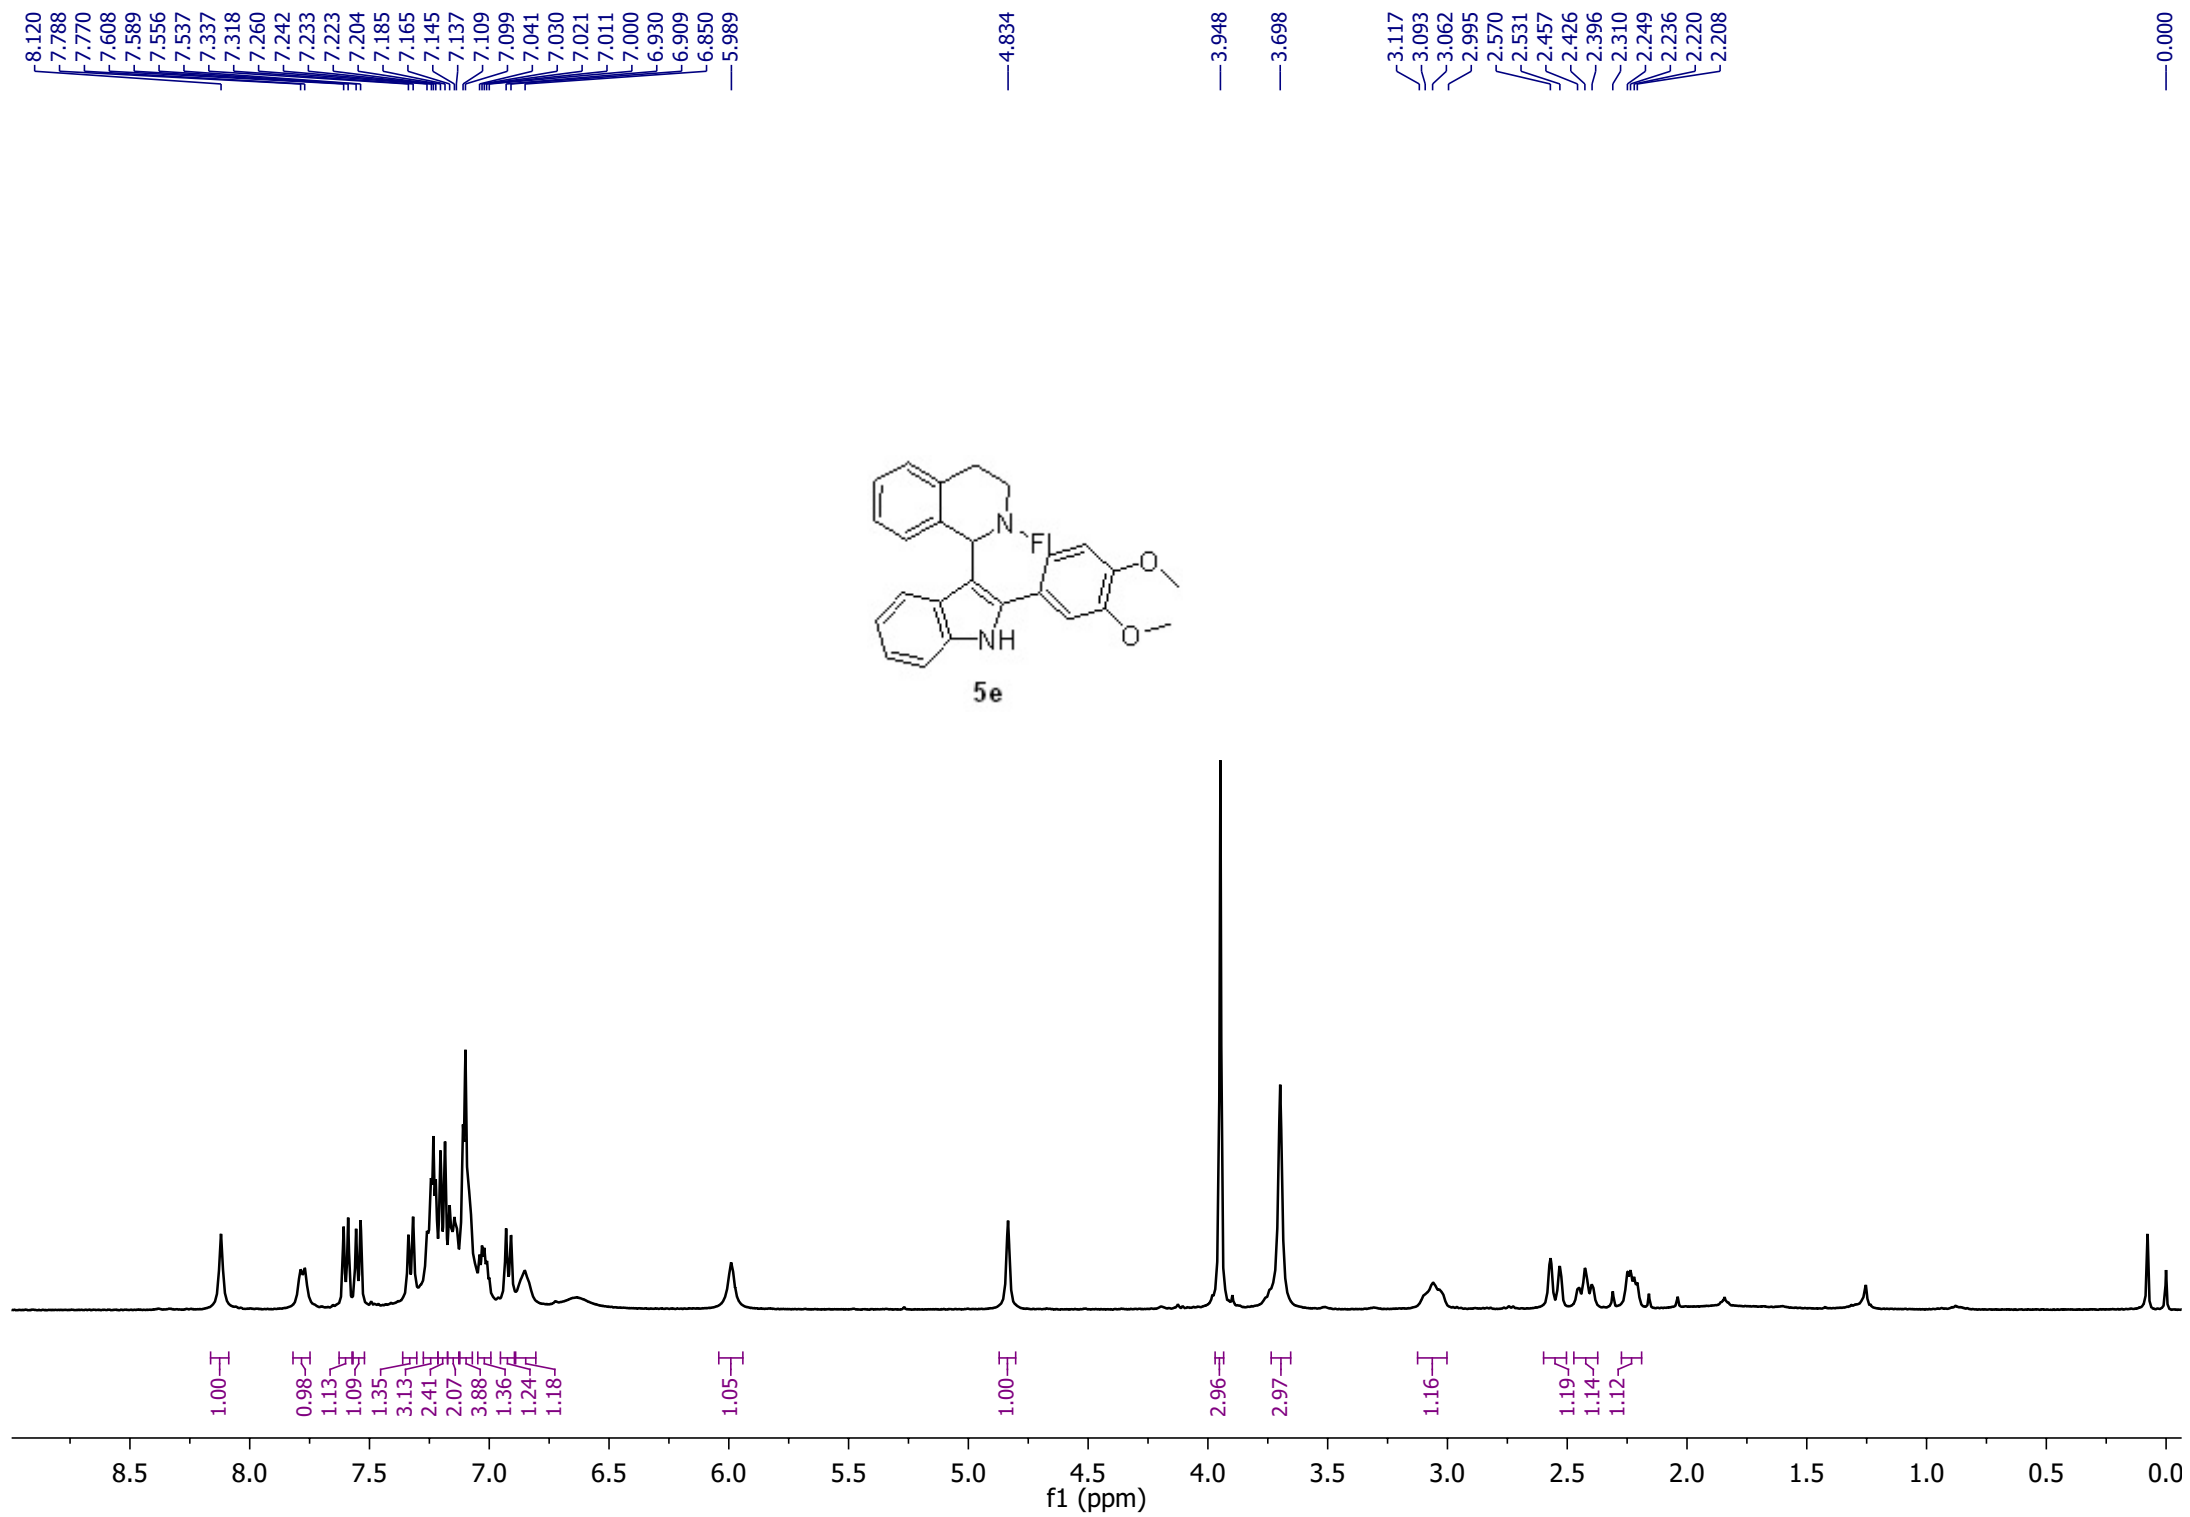

149.671  
149.472  
146.578  
144.084  
141.497  
140.558  
139.754  
138.247  
136.553  
135.679  
128.833  
127.797  
127.690  
127.538  
127.395  
126.277  
126.192  
126.101  
125.999  
125.934  
125.884  
122.564  
121.755  
119.978  
119.873  
119.056  
114.189  
112.578  
111.658  
110.832

65.162

59.753

56.337

56.214

44.010

30.725

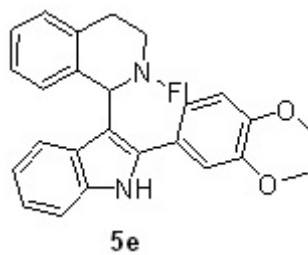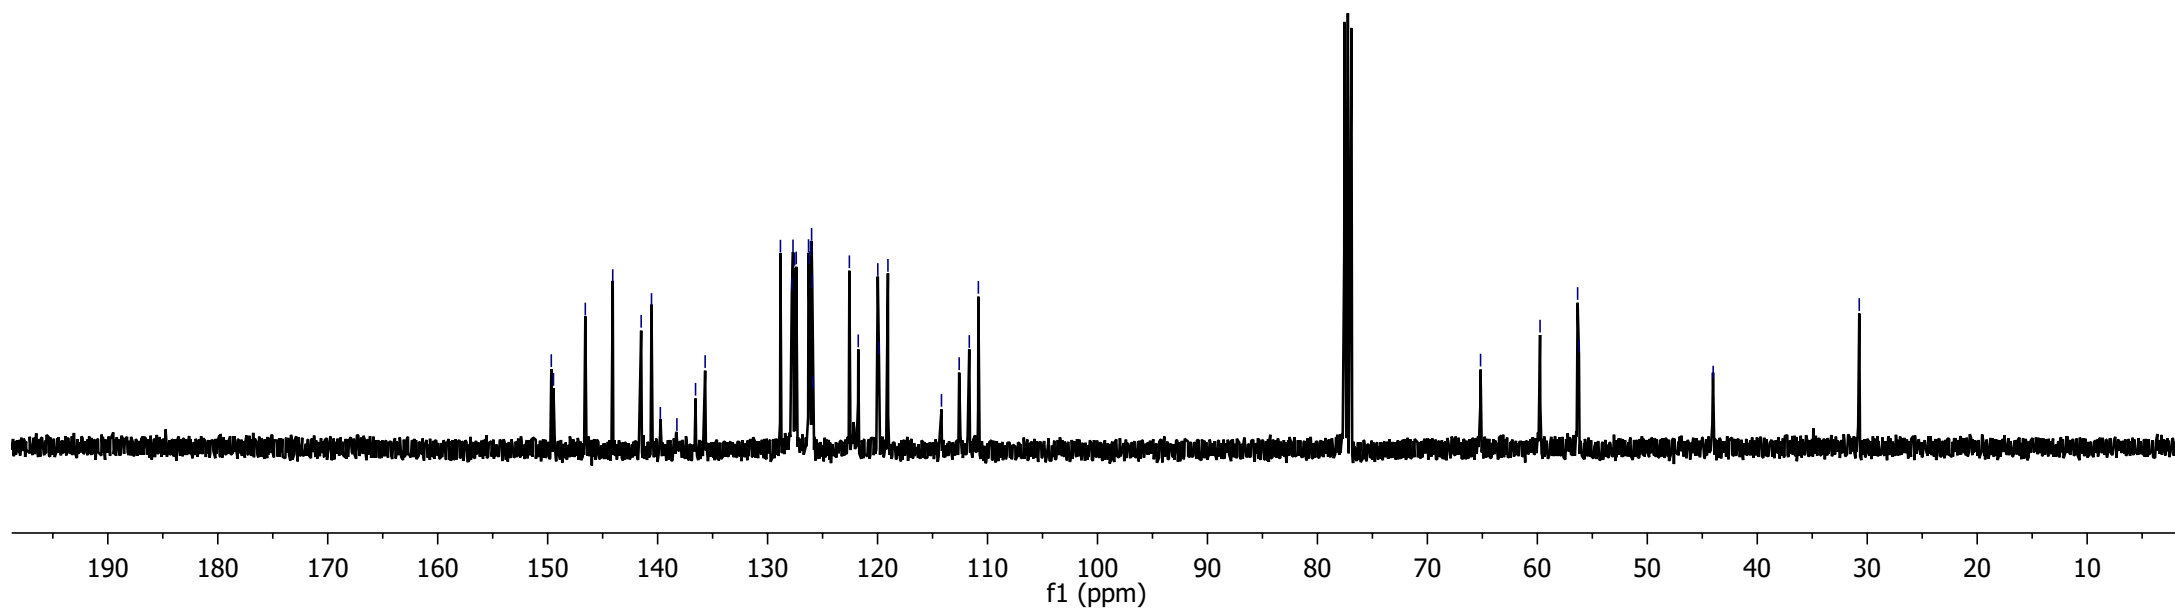

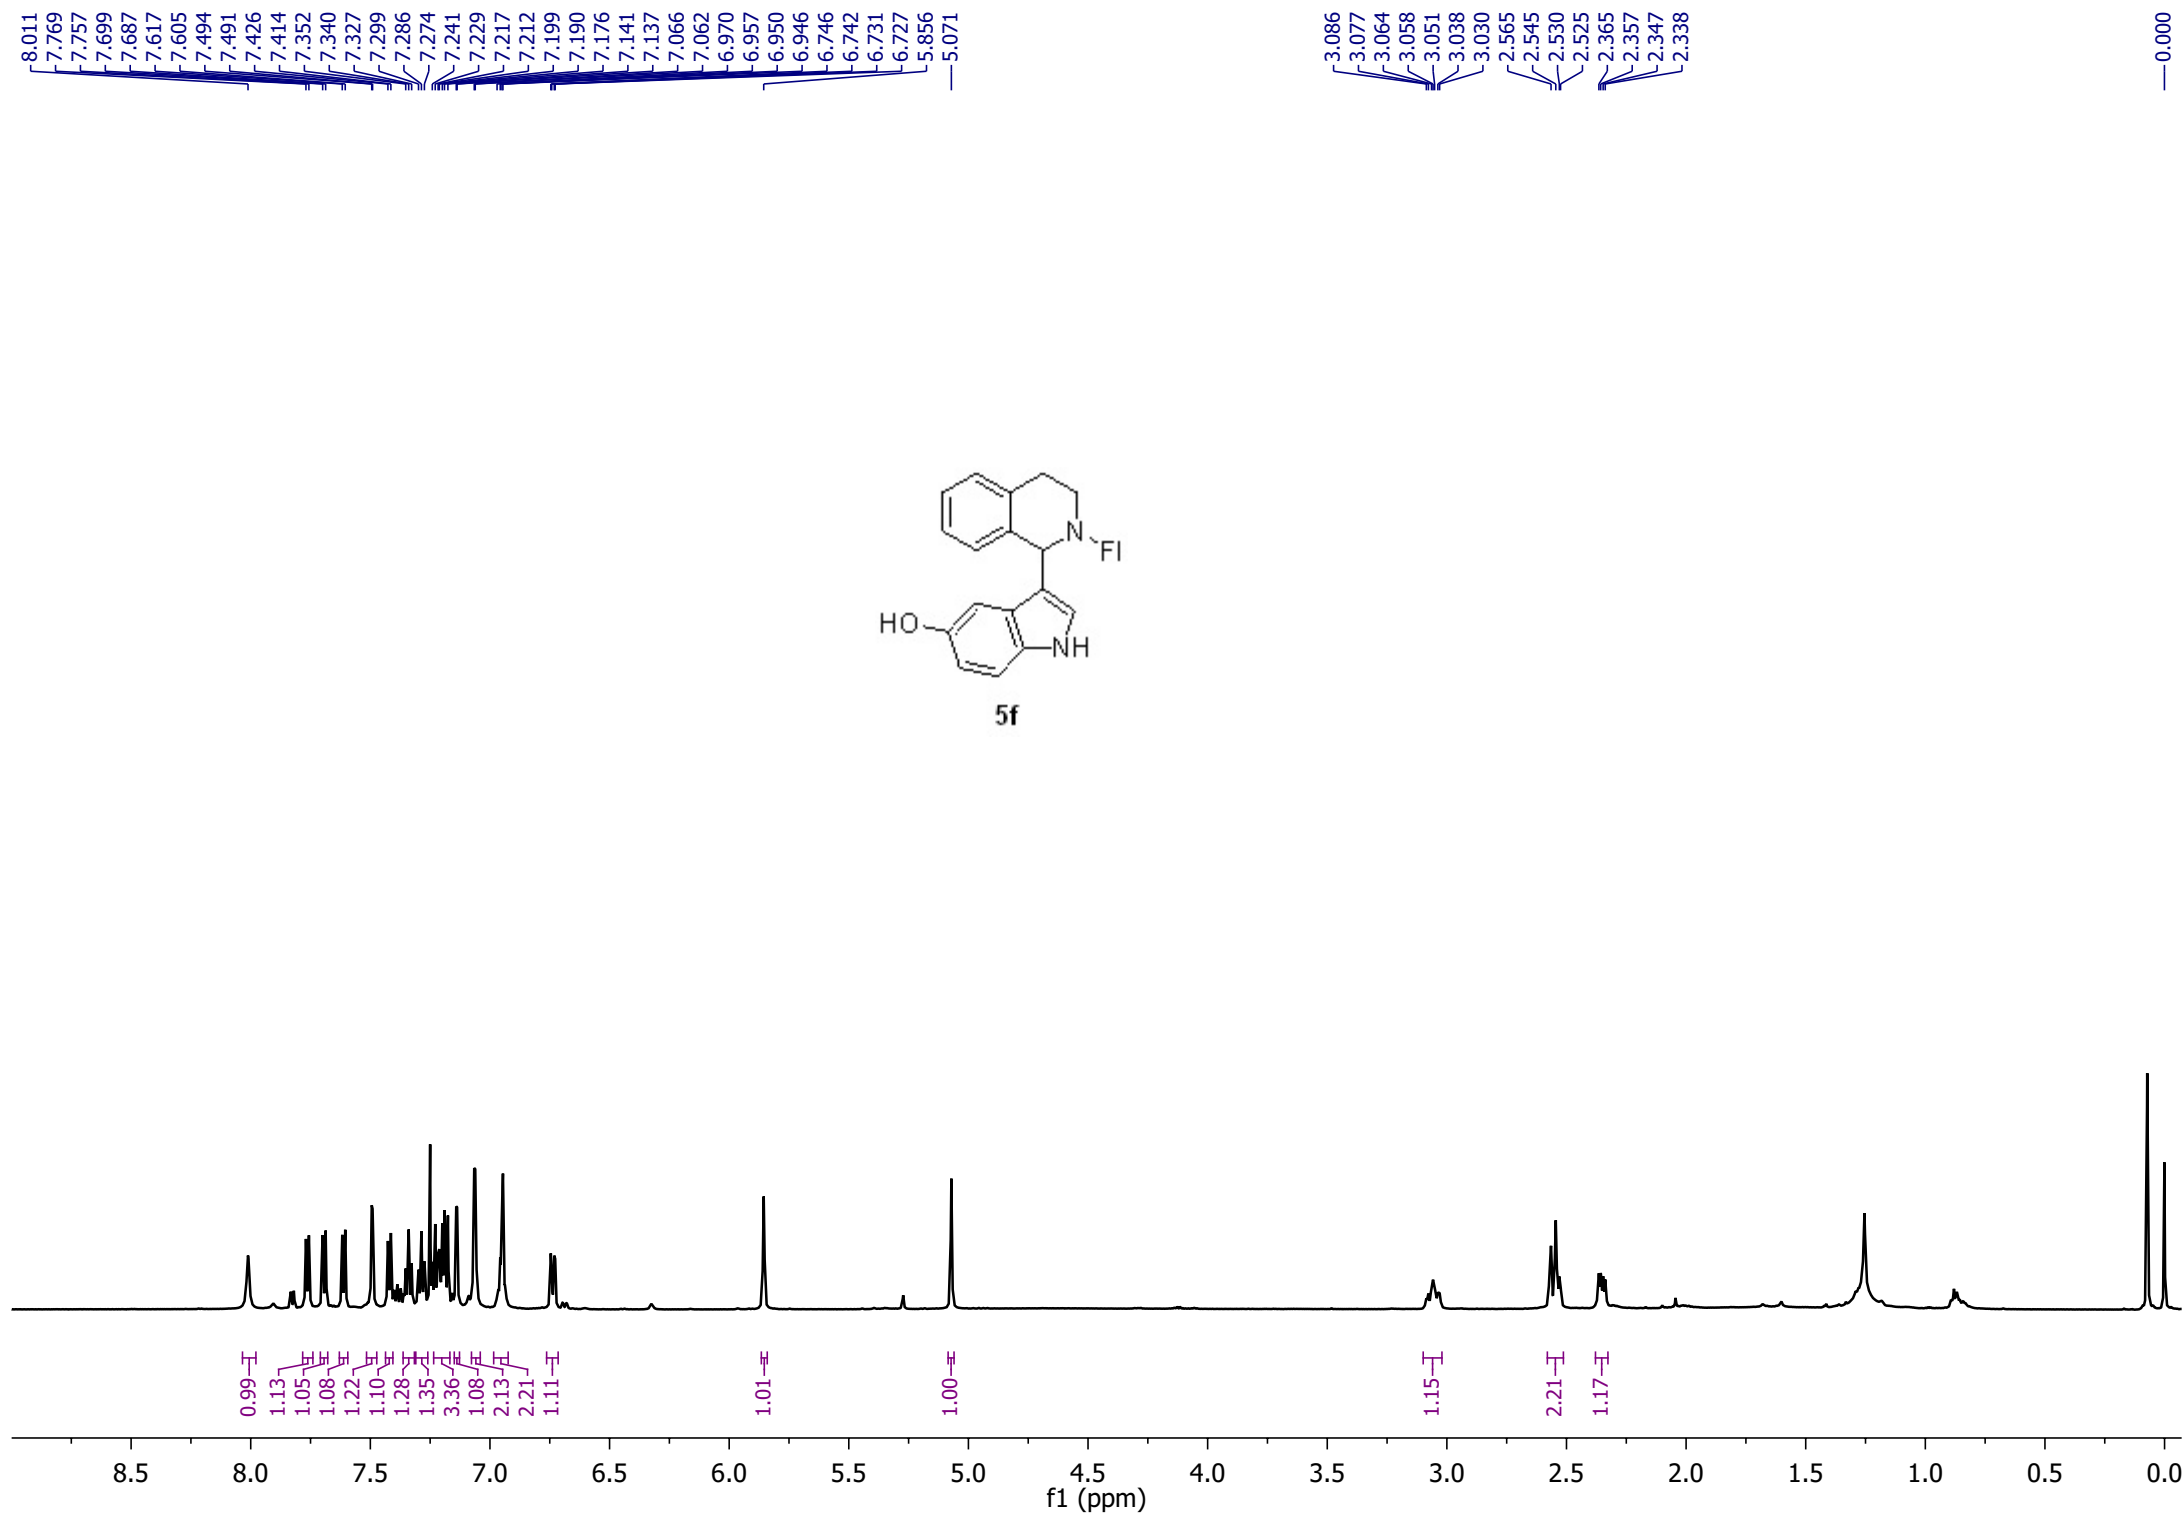

149.214  
146.367  
144.682  
141.577  
140.554  
139.174  
135.324  
132.644  
128.533  
128.044  
127.741  
127.716  
127.458  
127.251  
127.047  
126.442  
126.119  
125.943  
125.879  
125.727  
120.230  
119.169  
117.464  
112.297  
111.816  
105.963

65.083

60.809

43.745

30.699

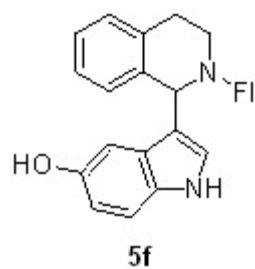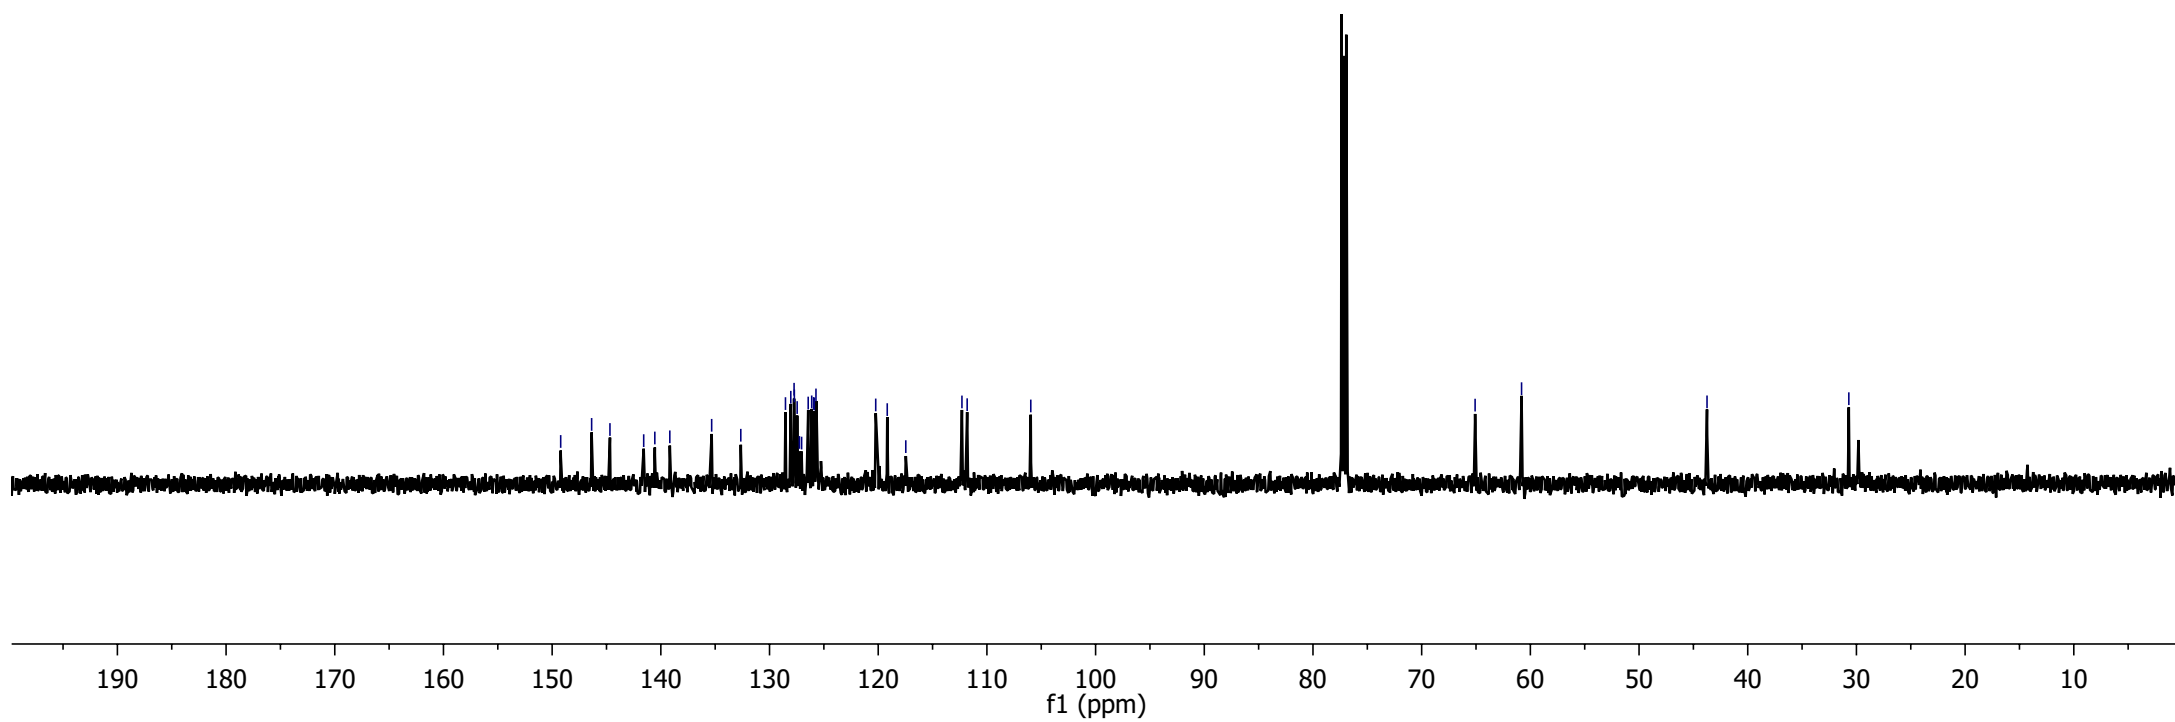

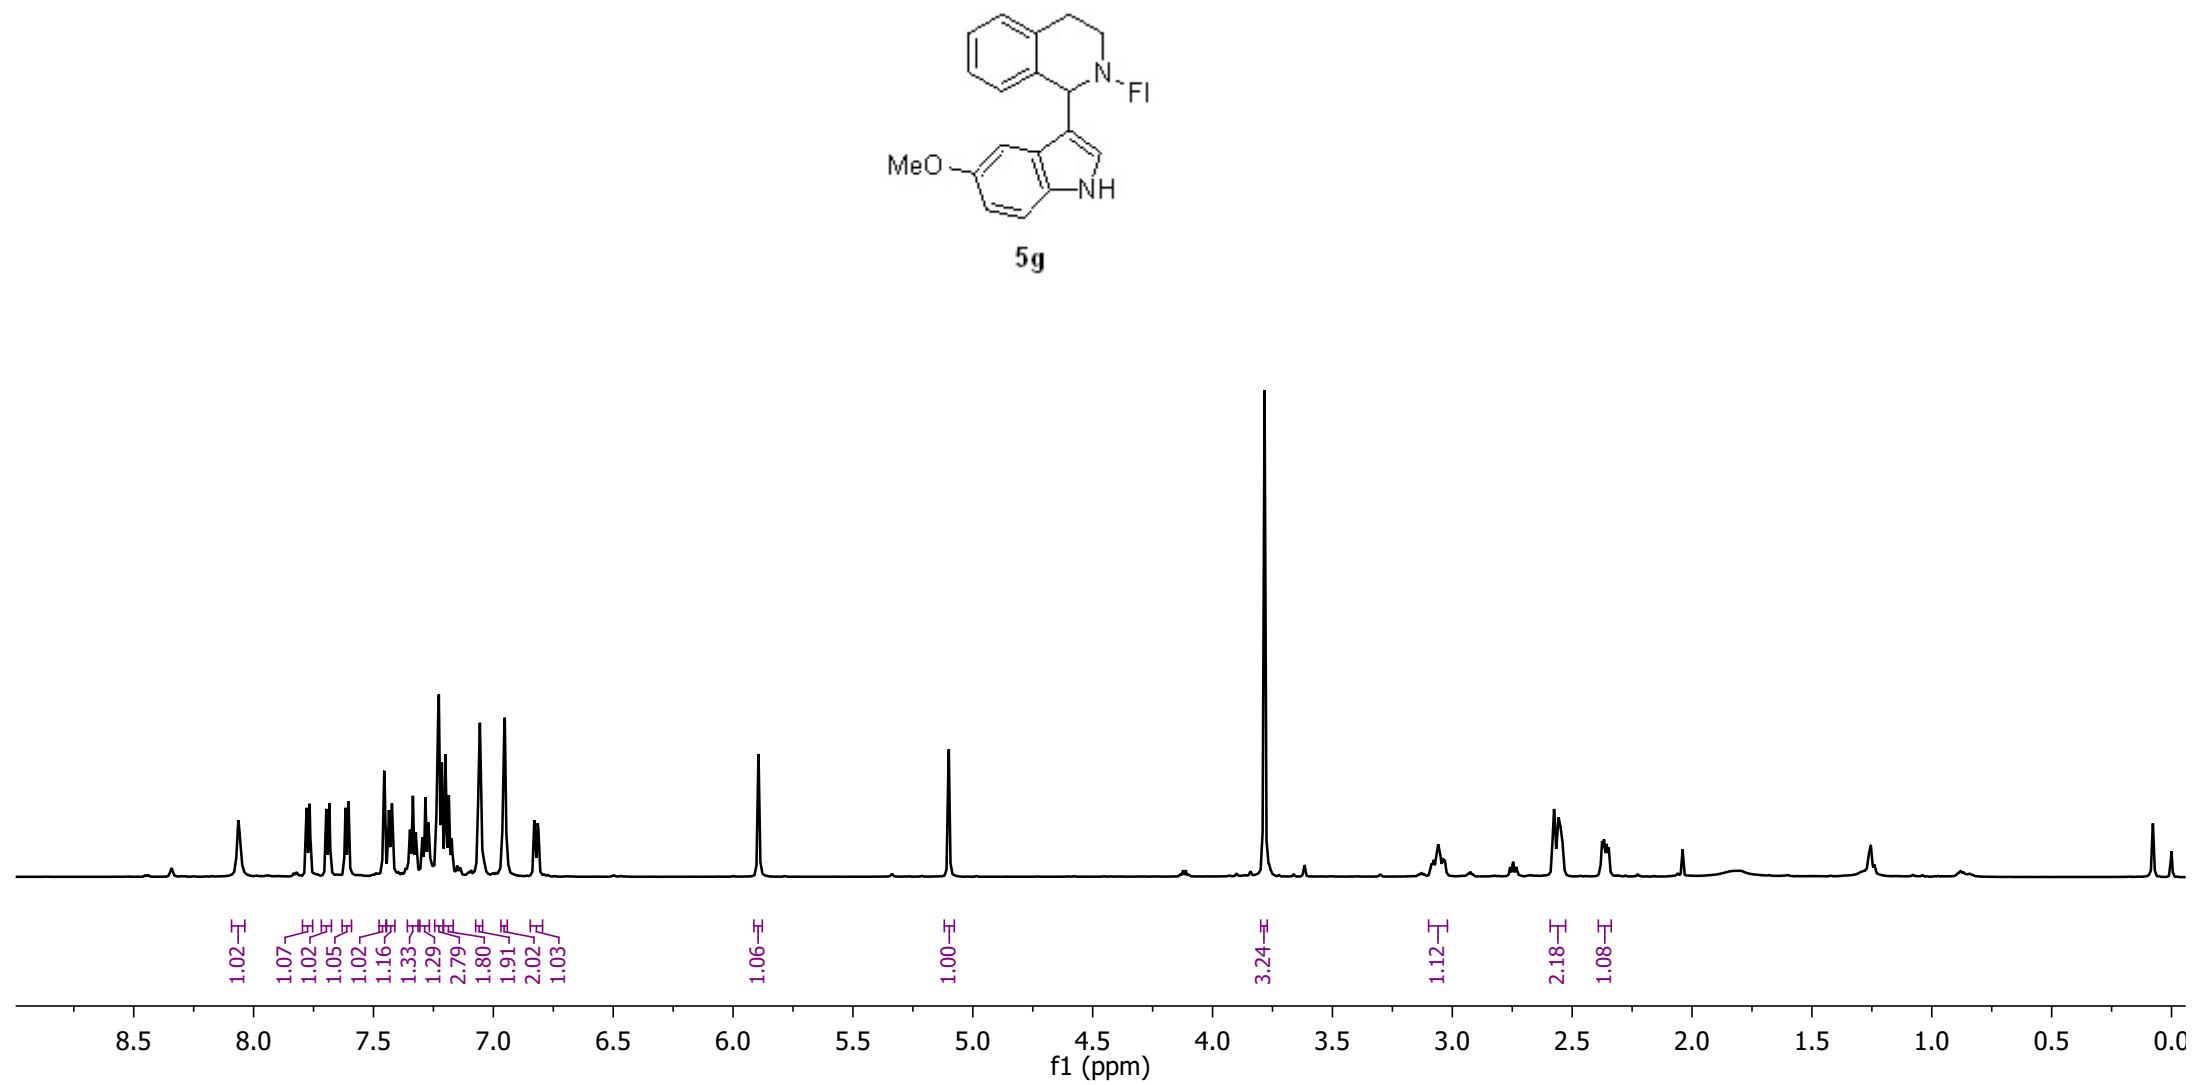

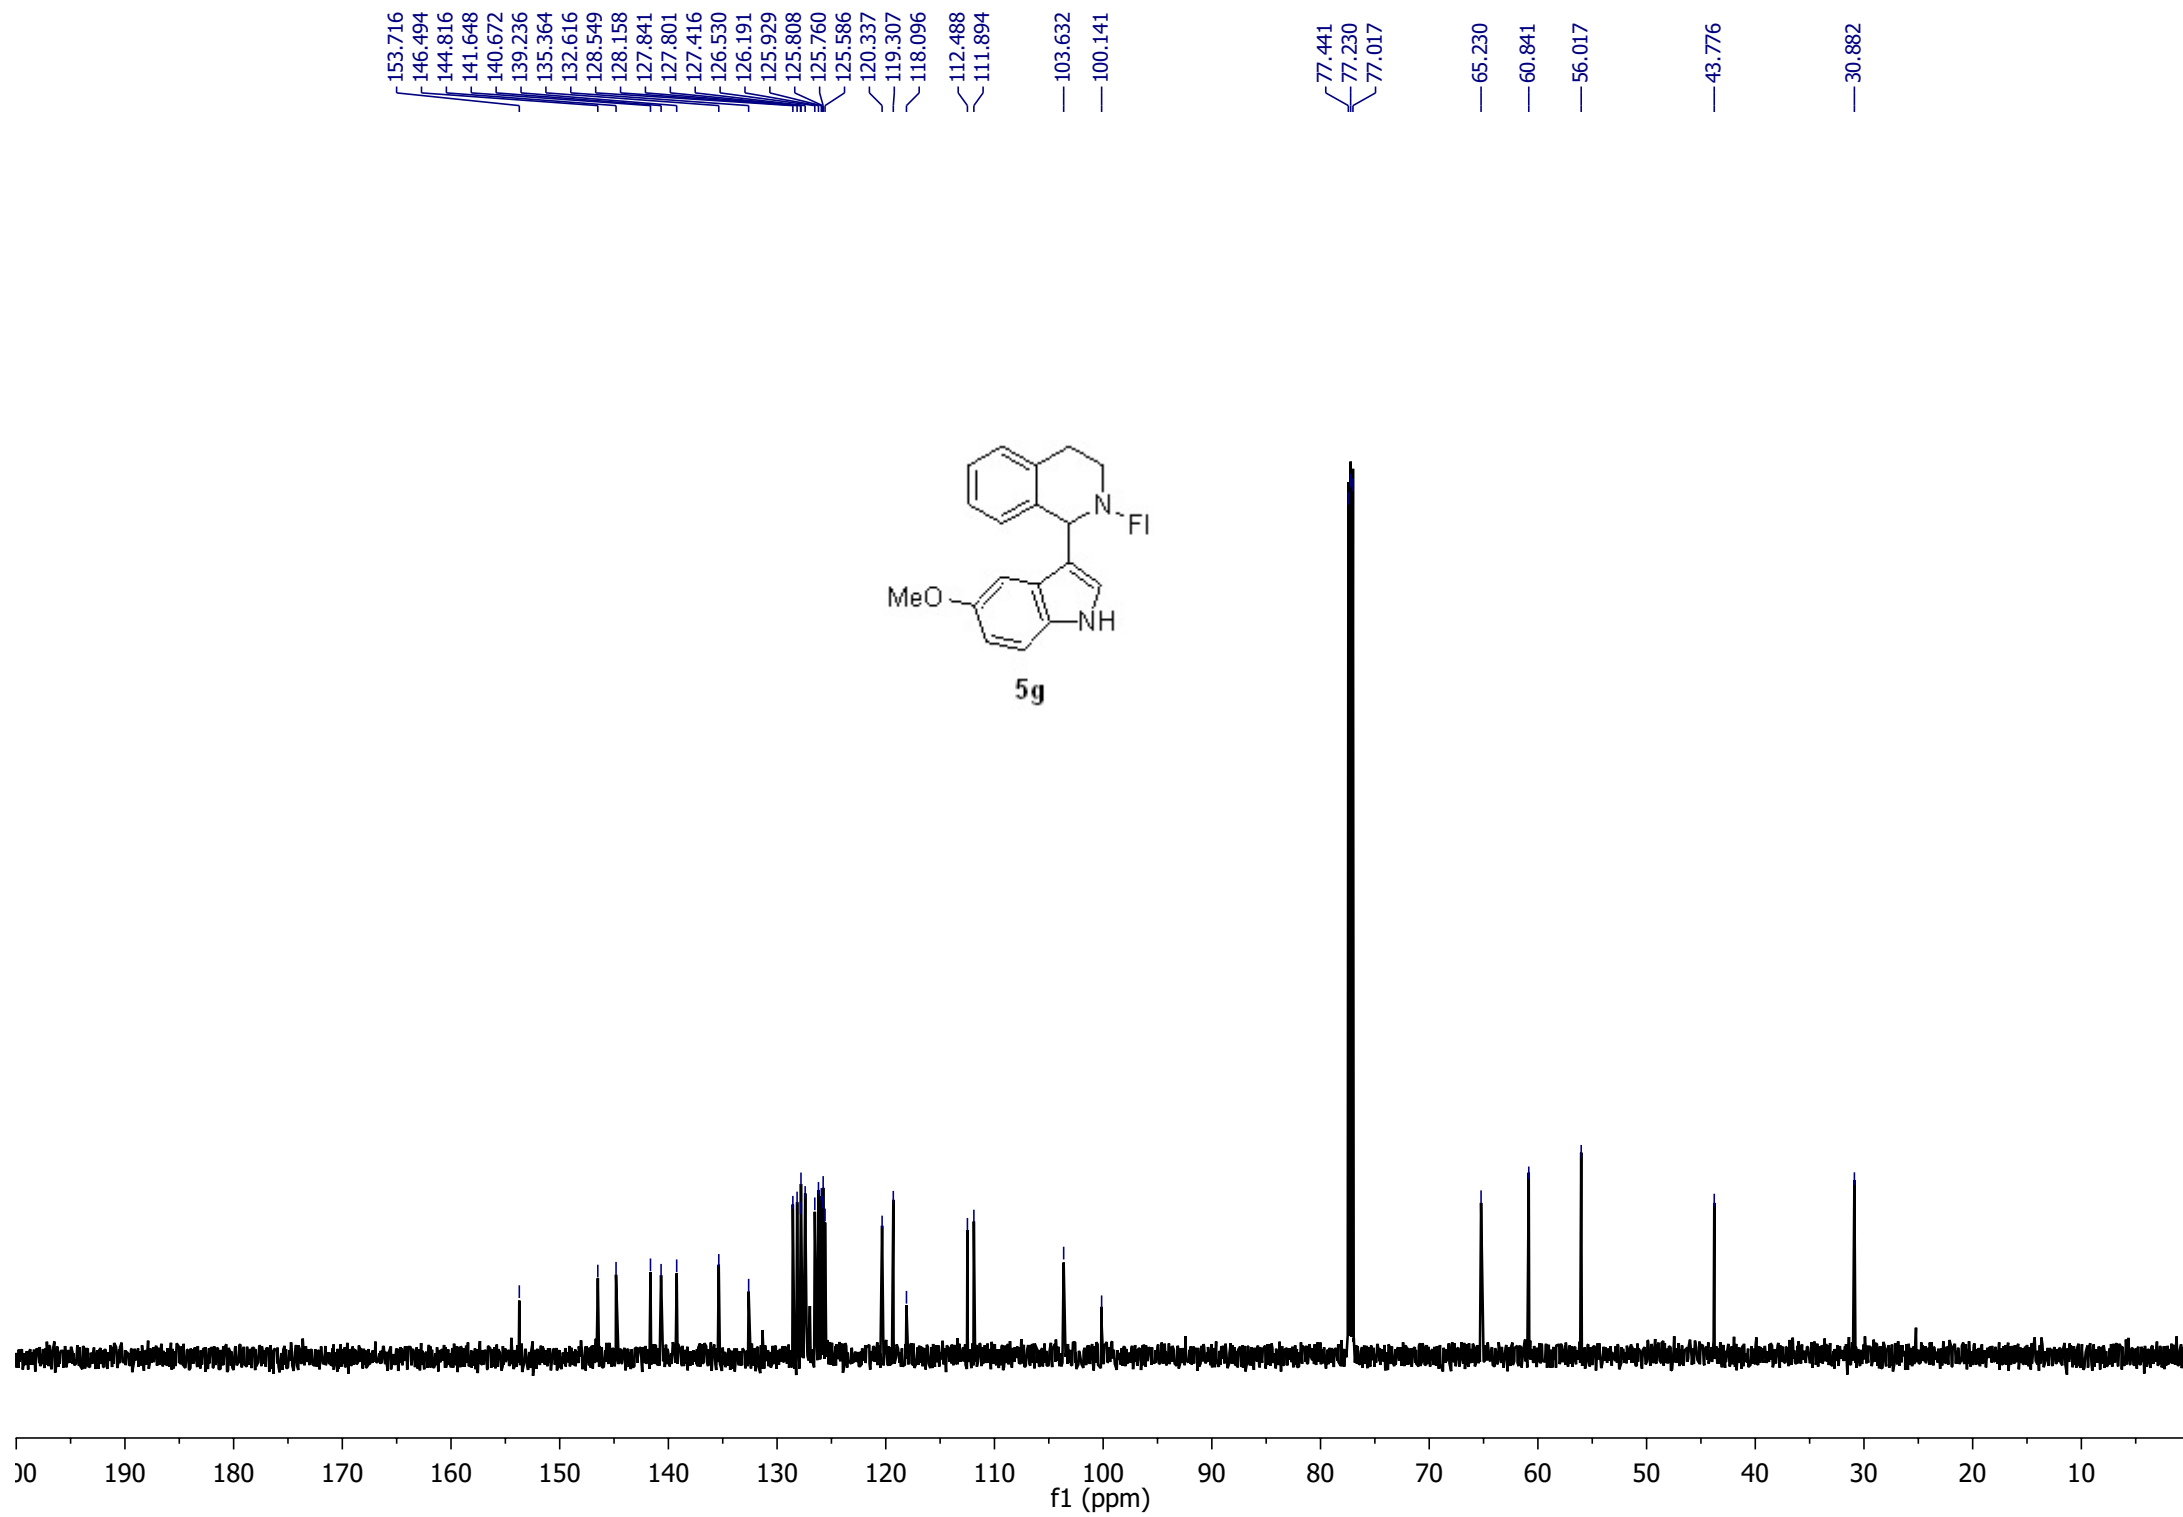

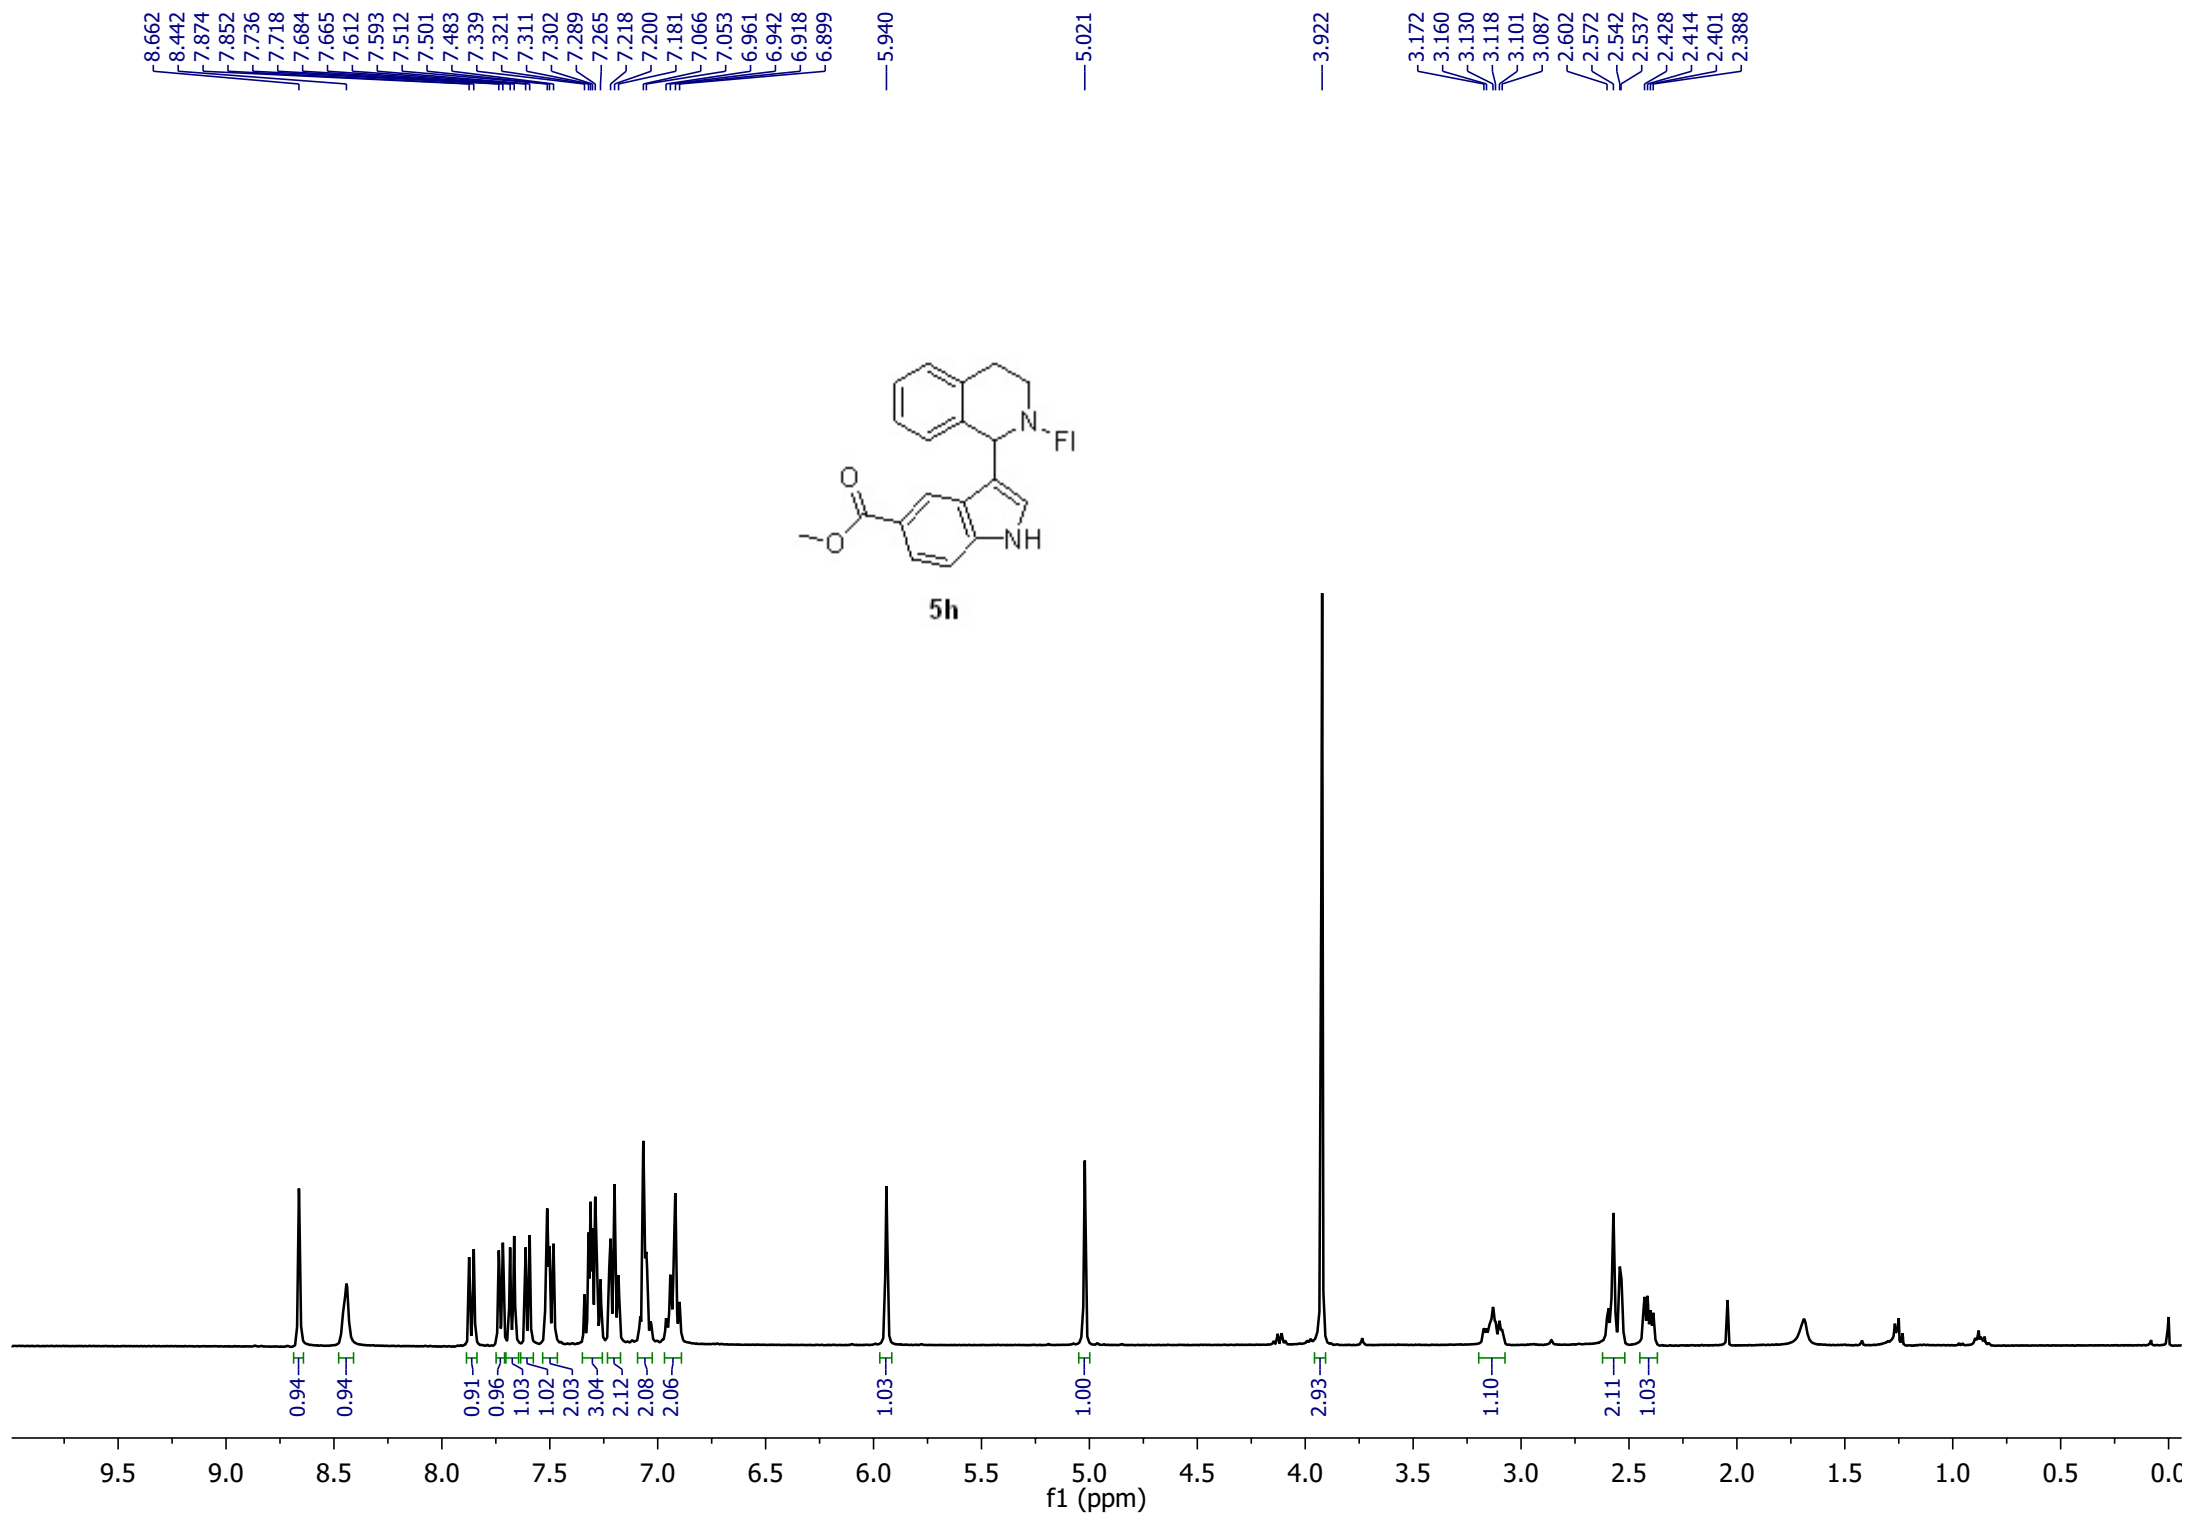

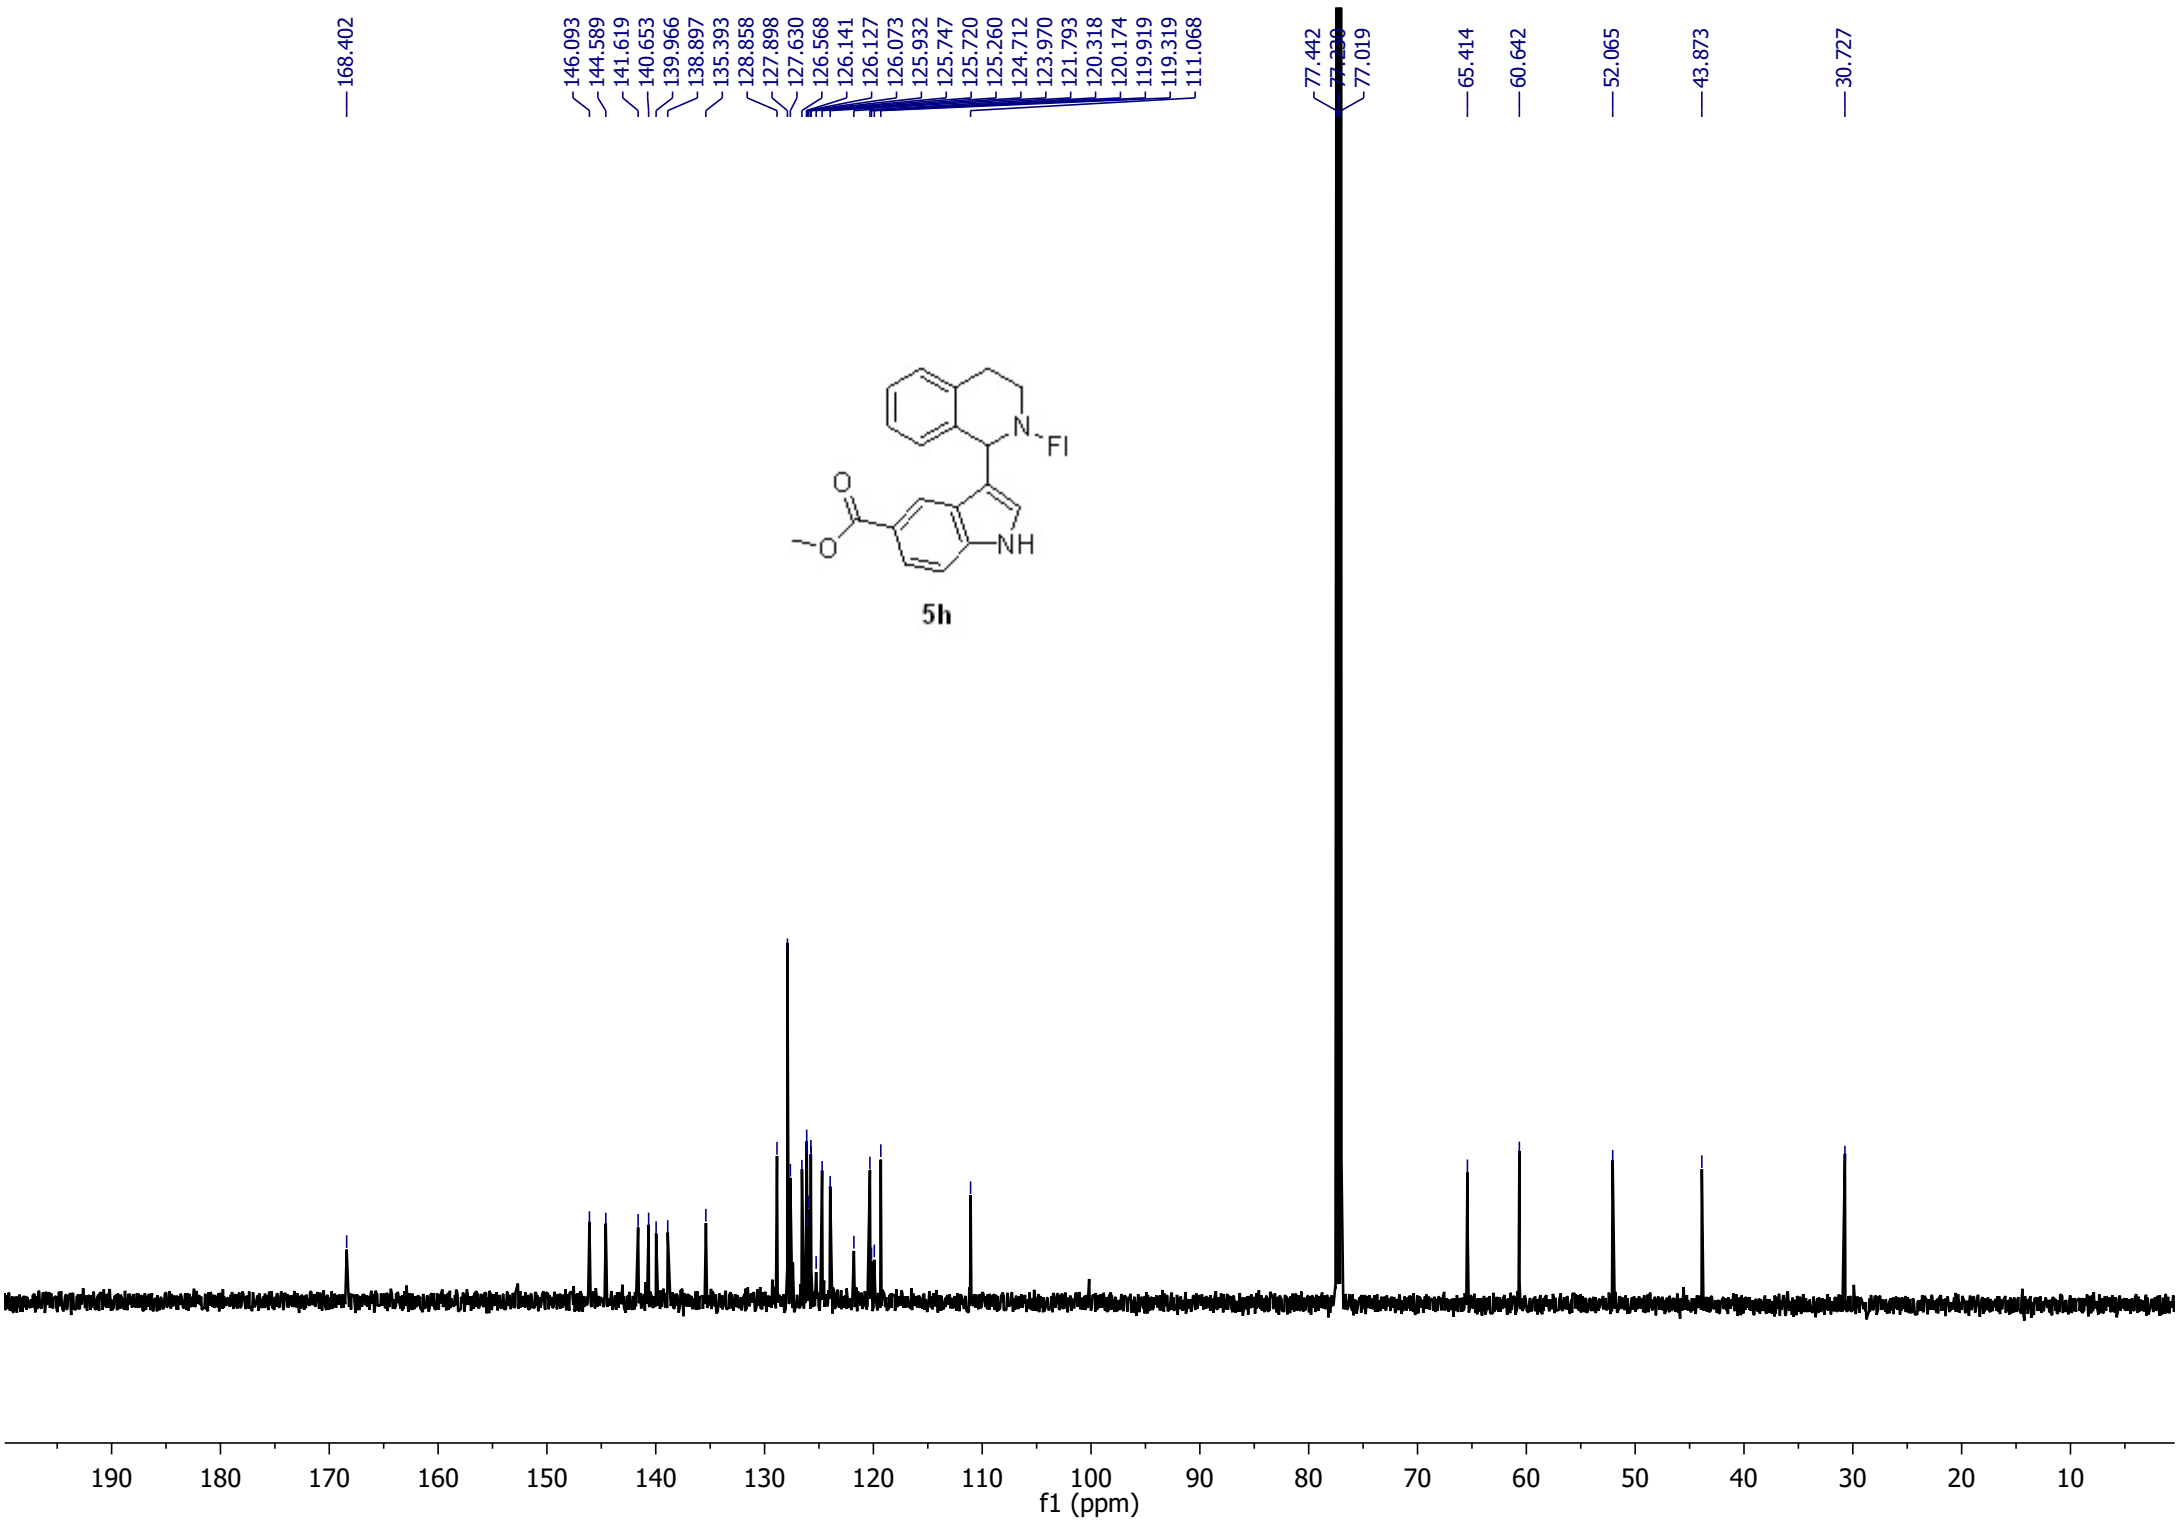

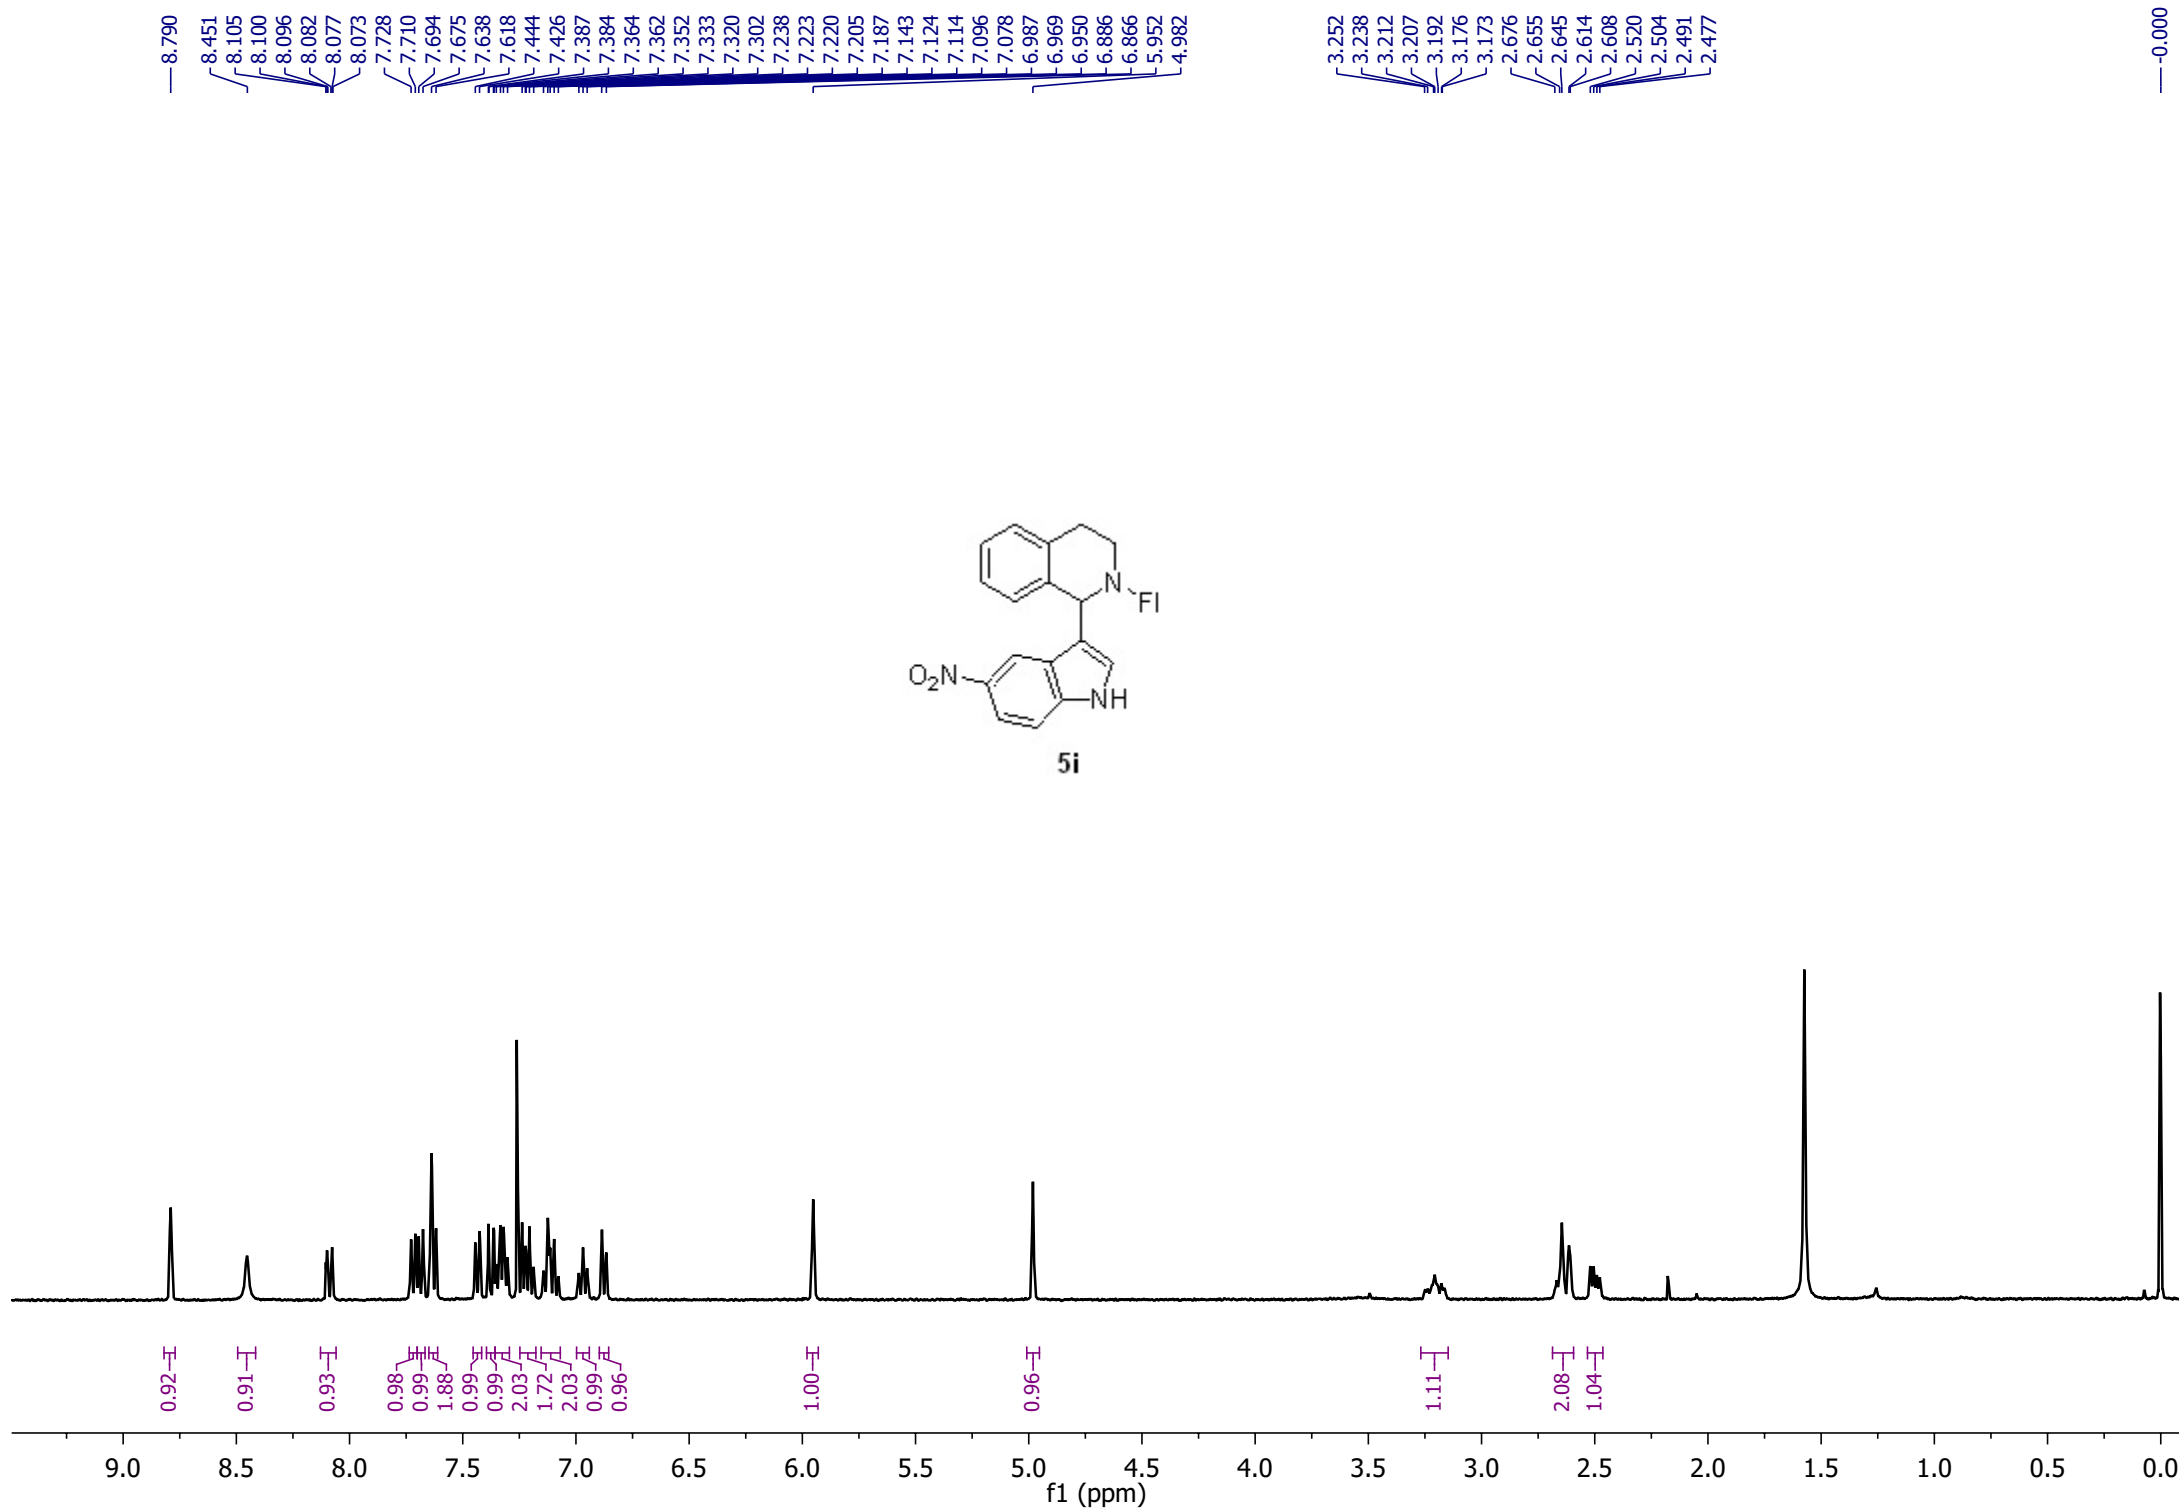

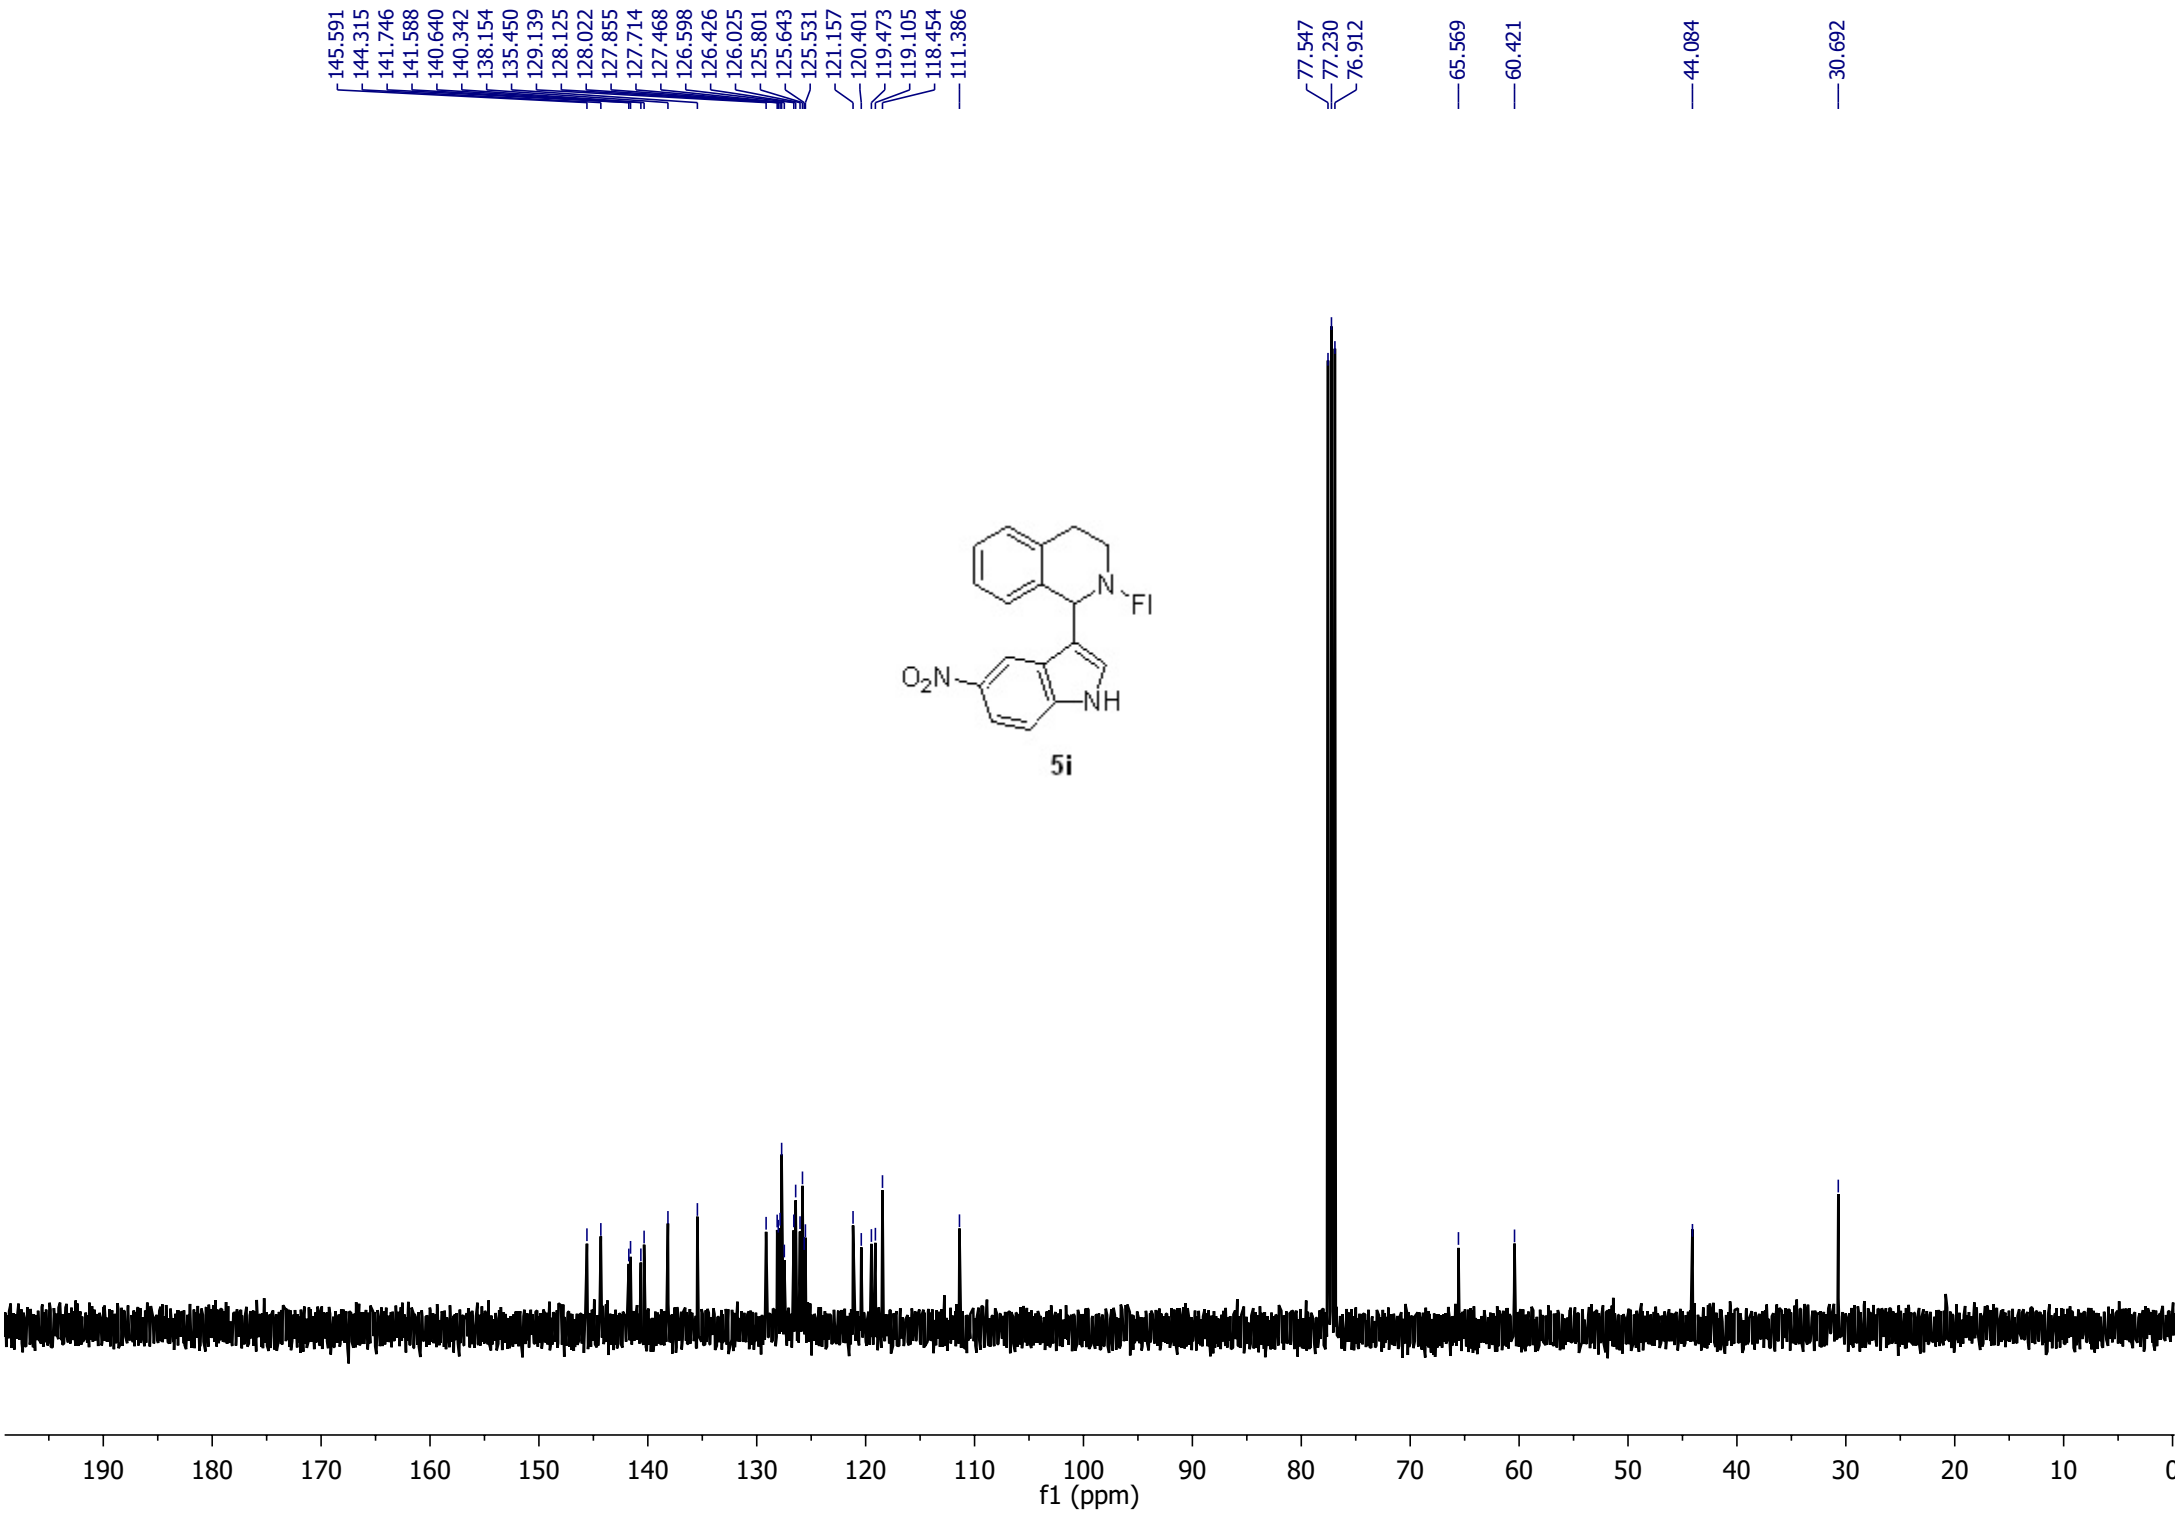

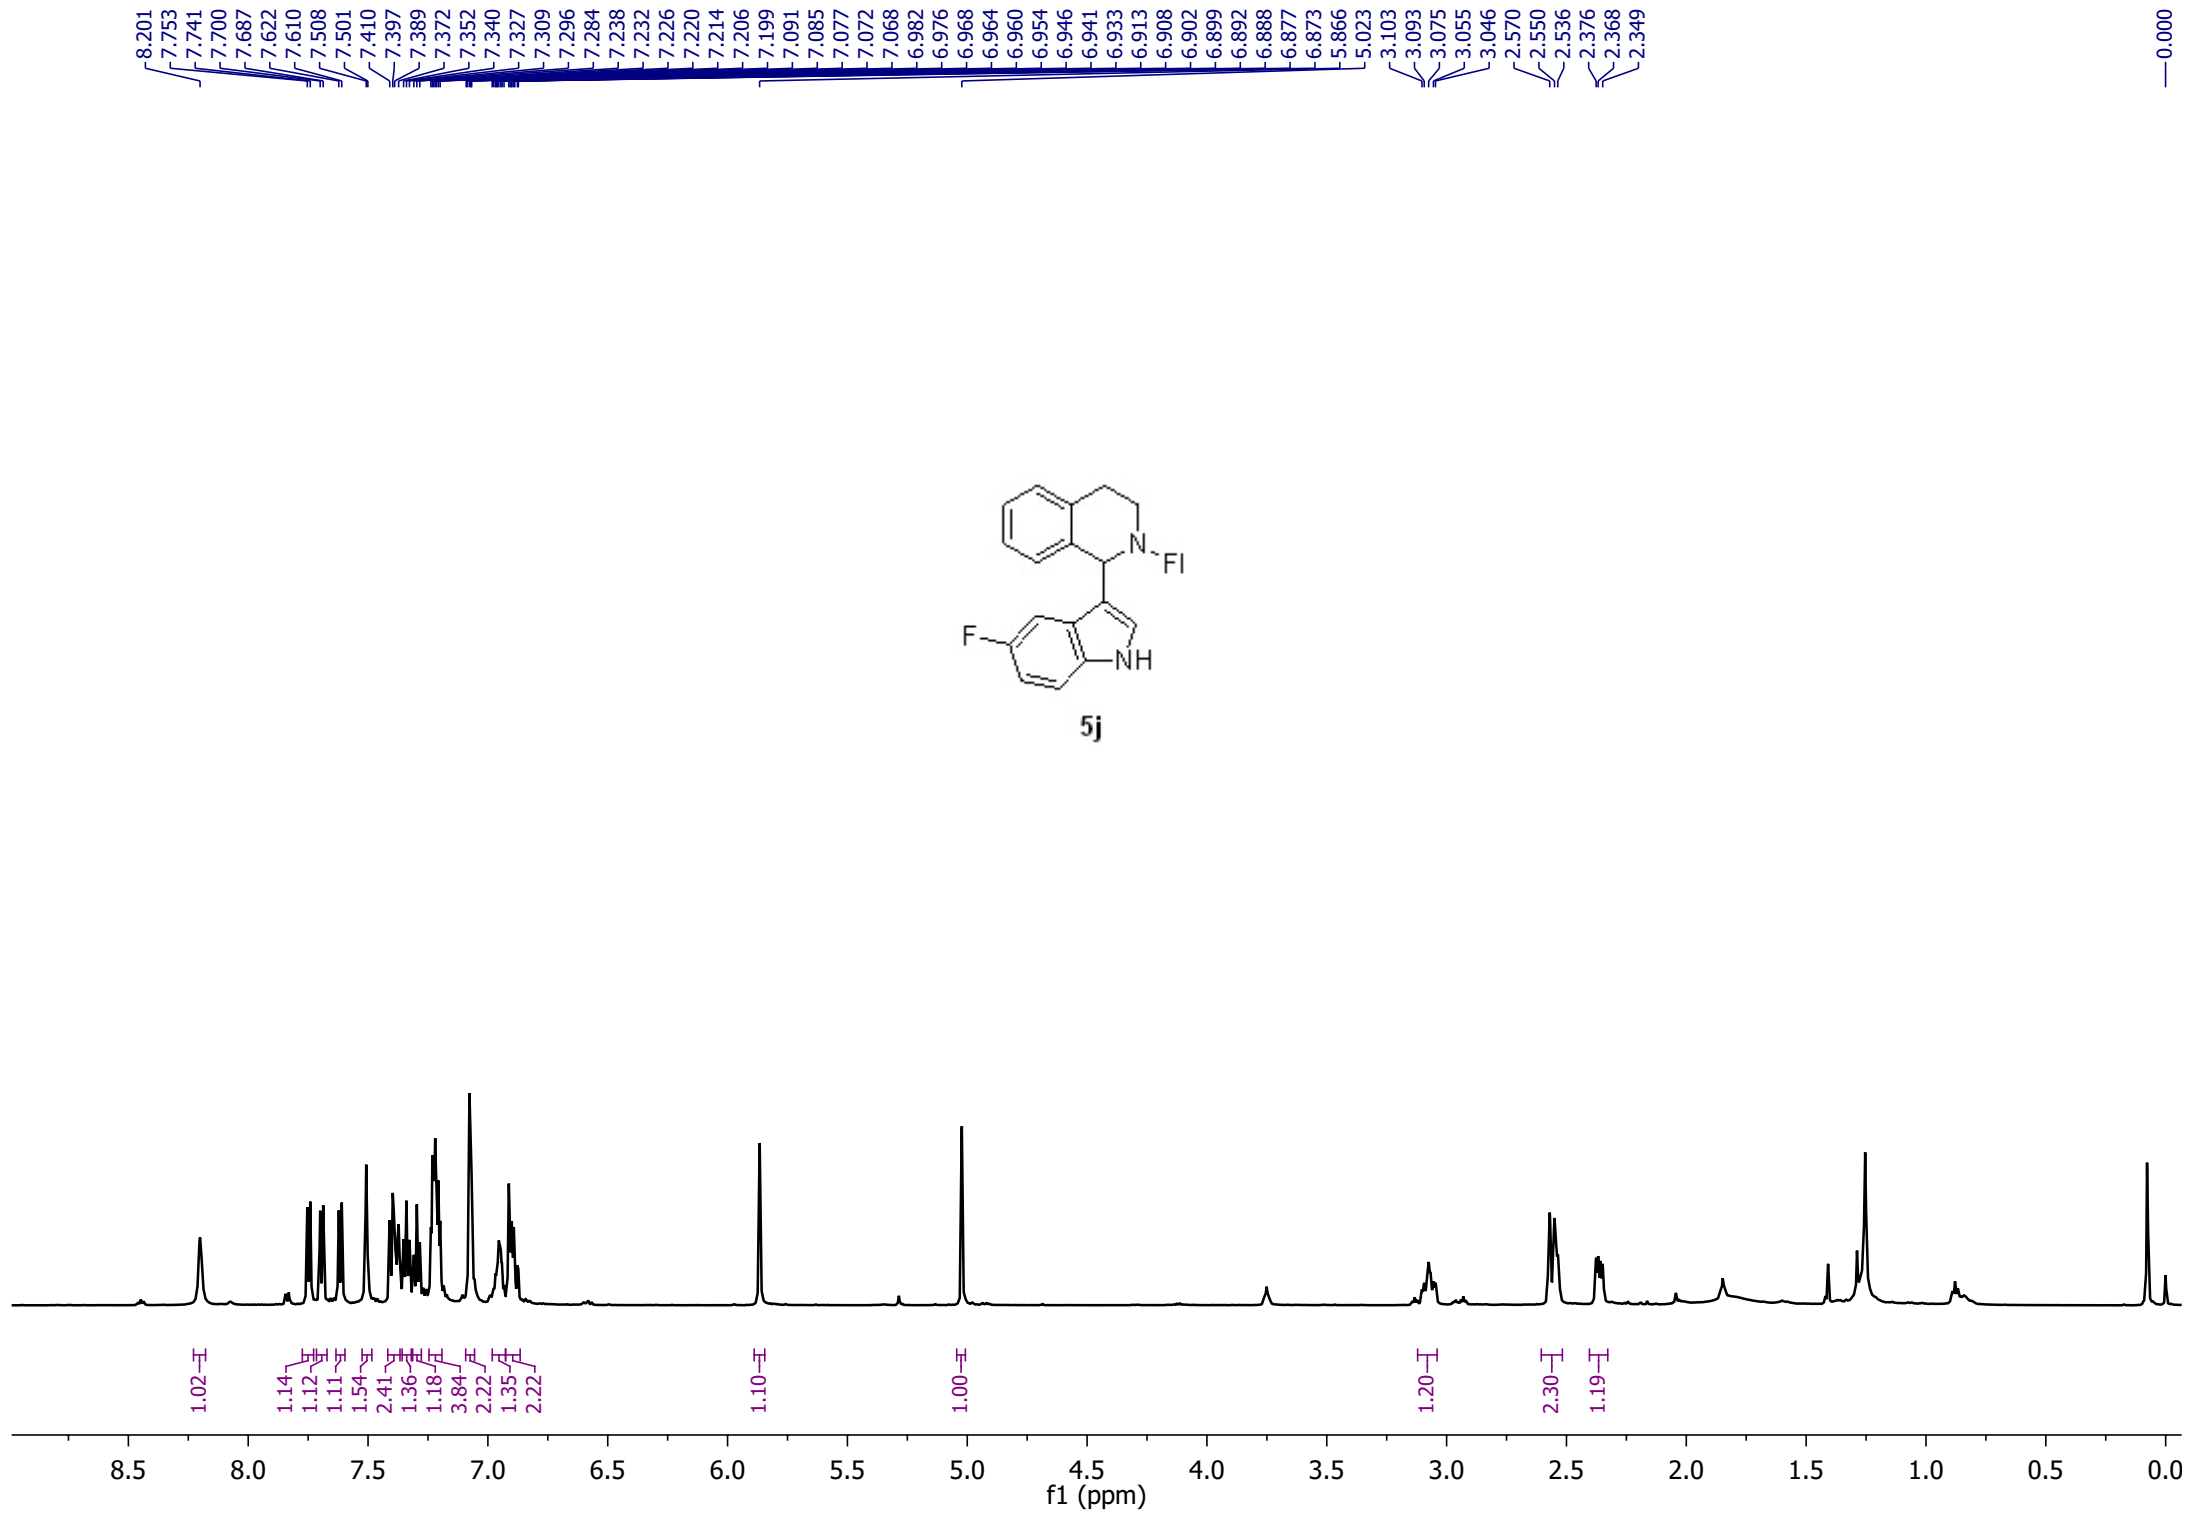

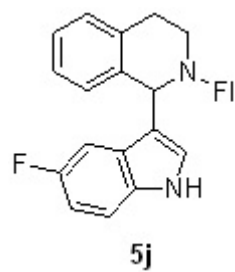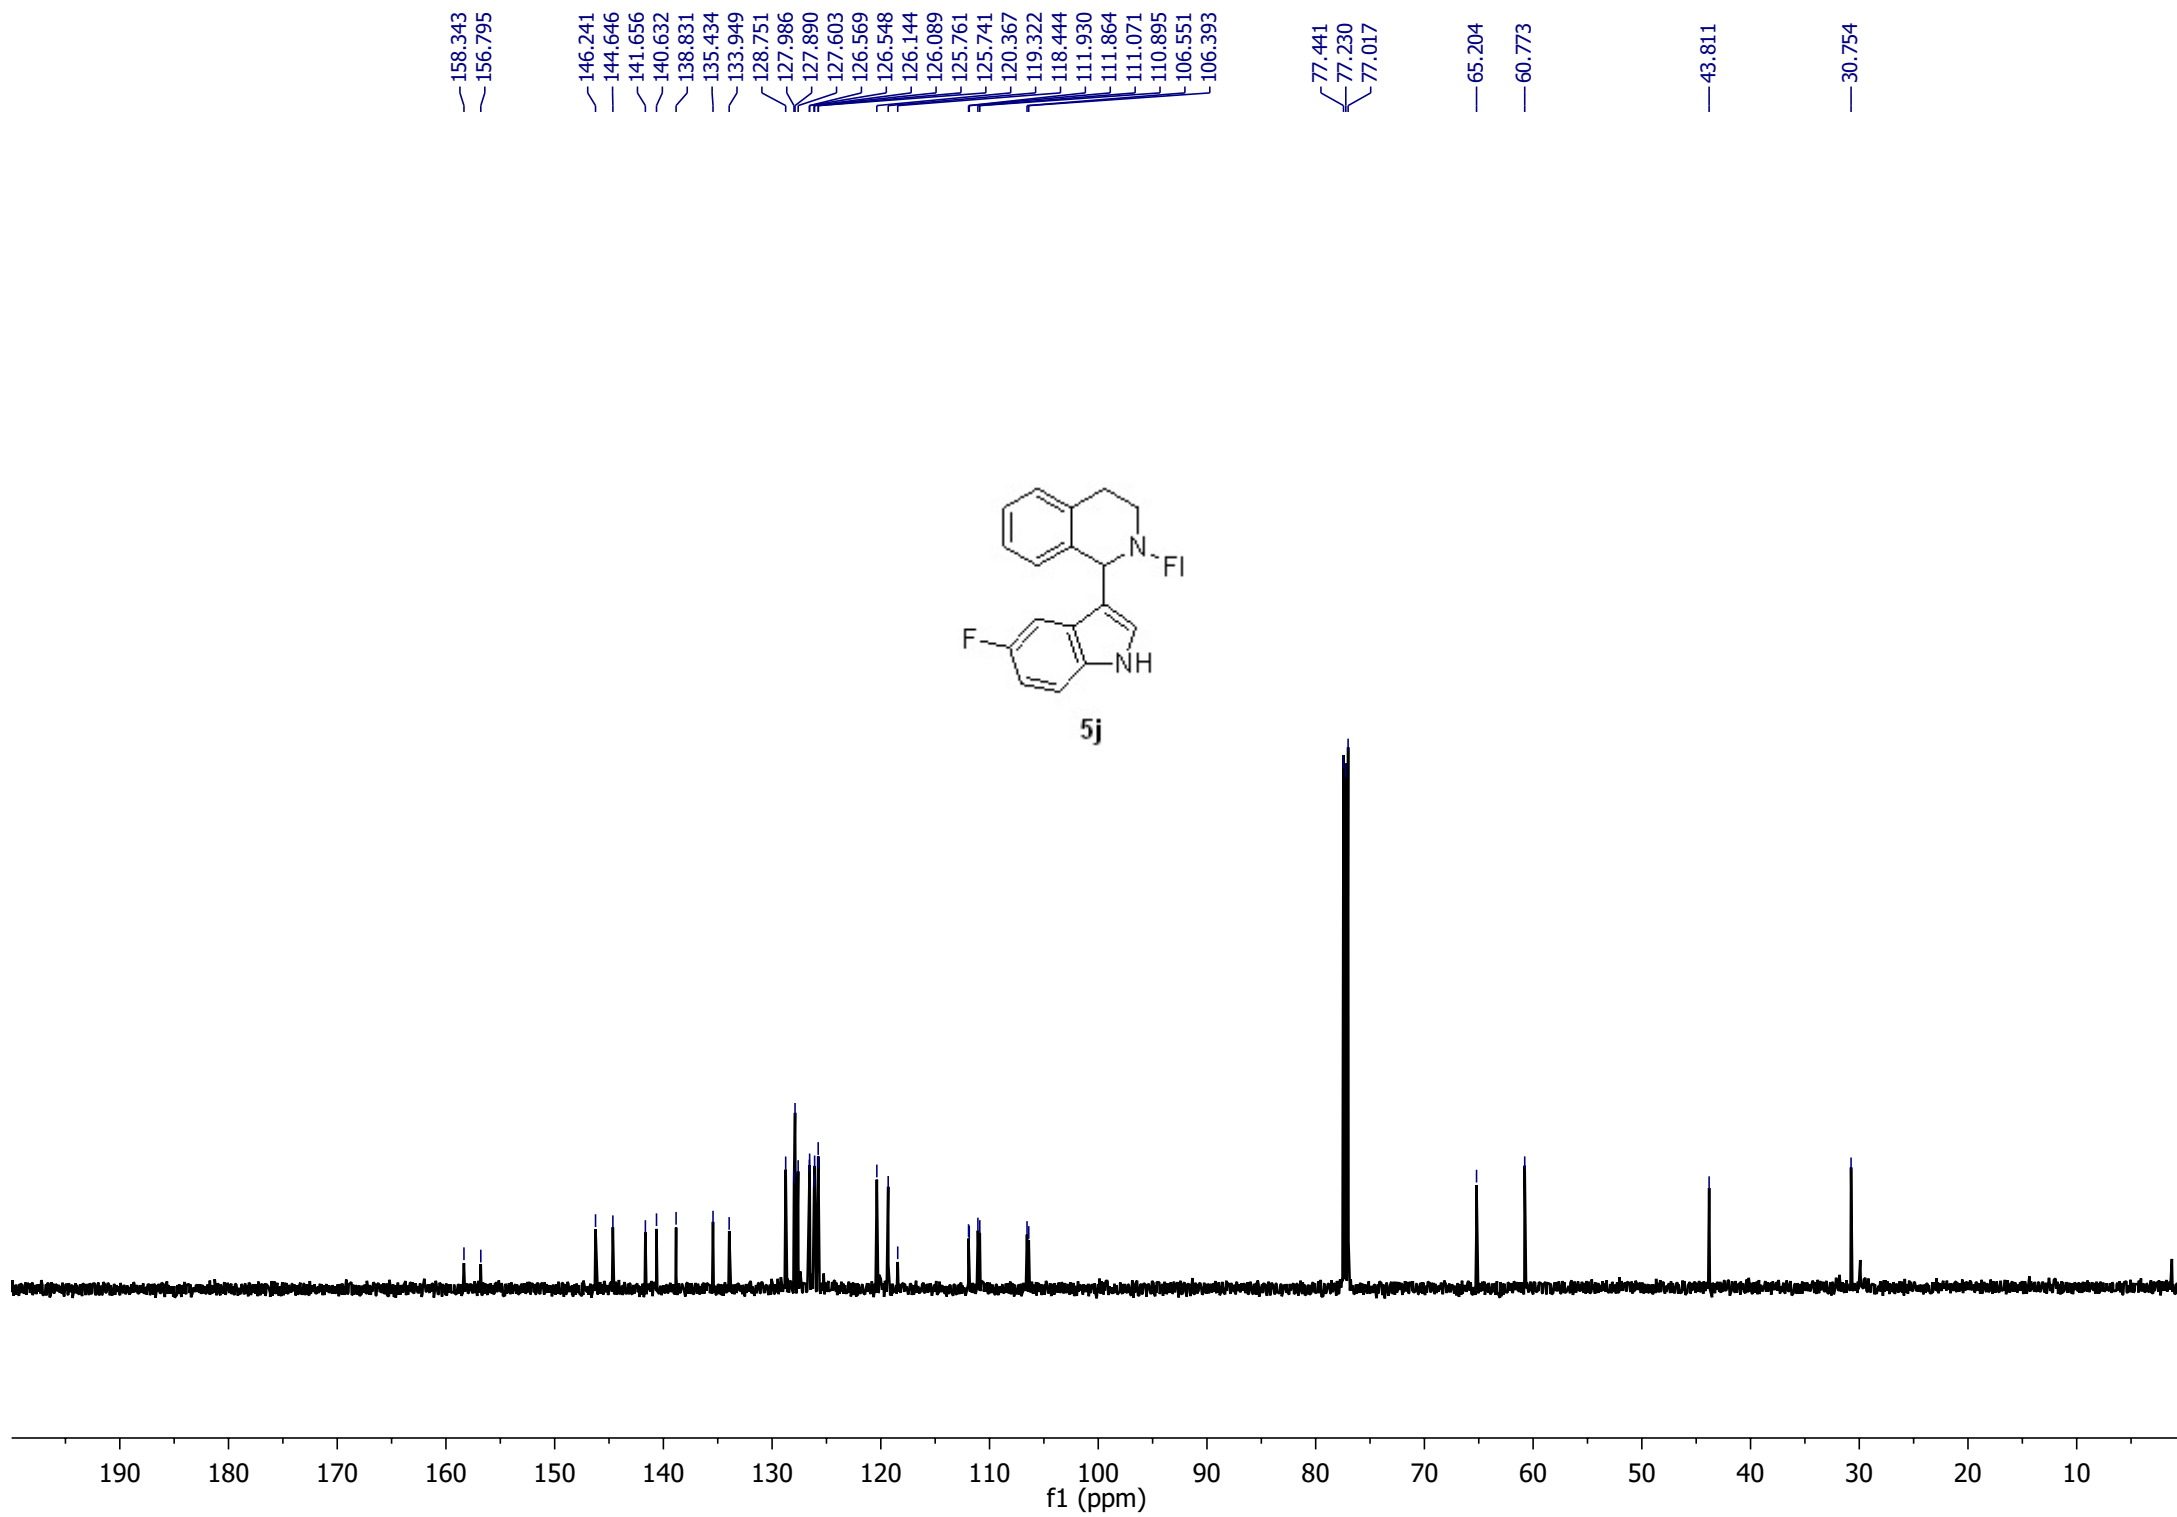

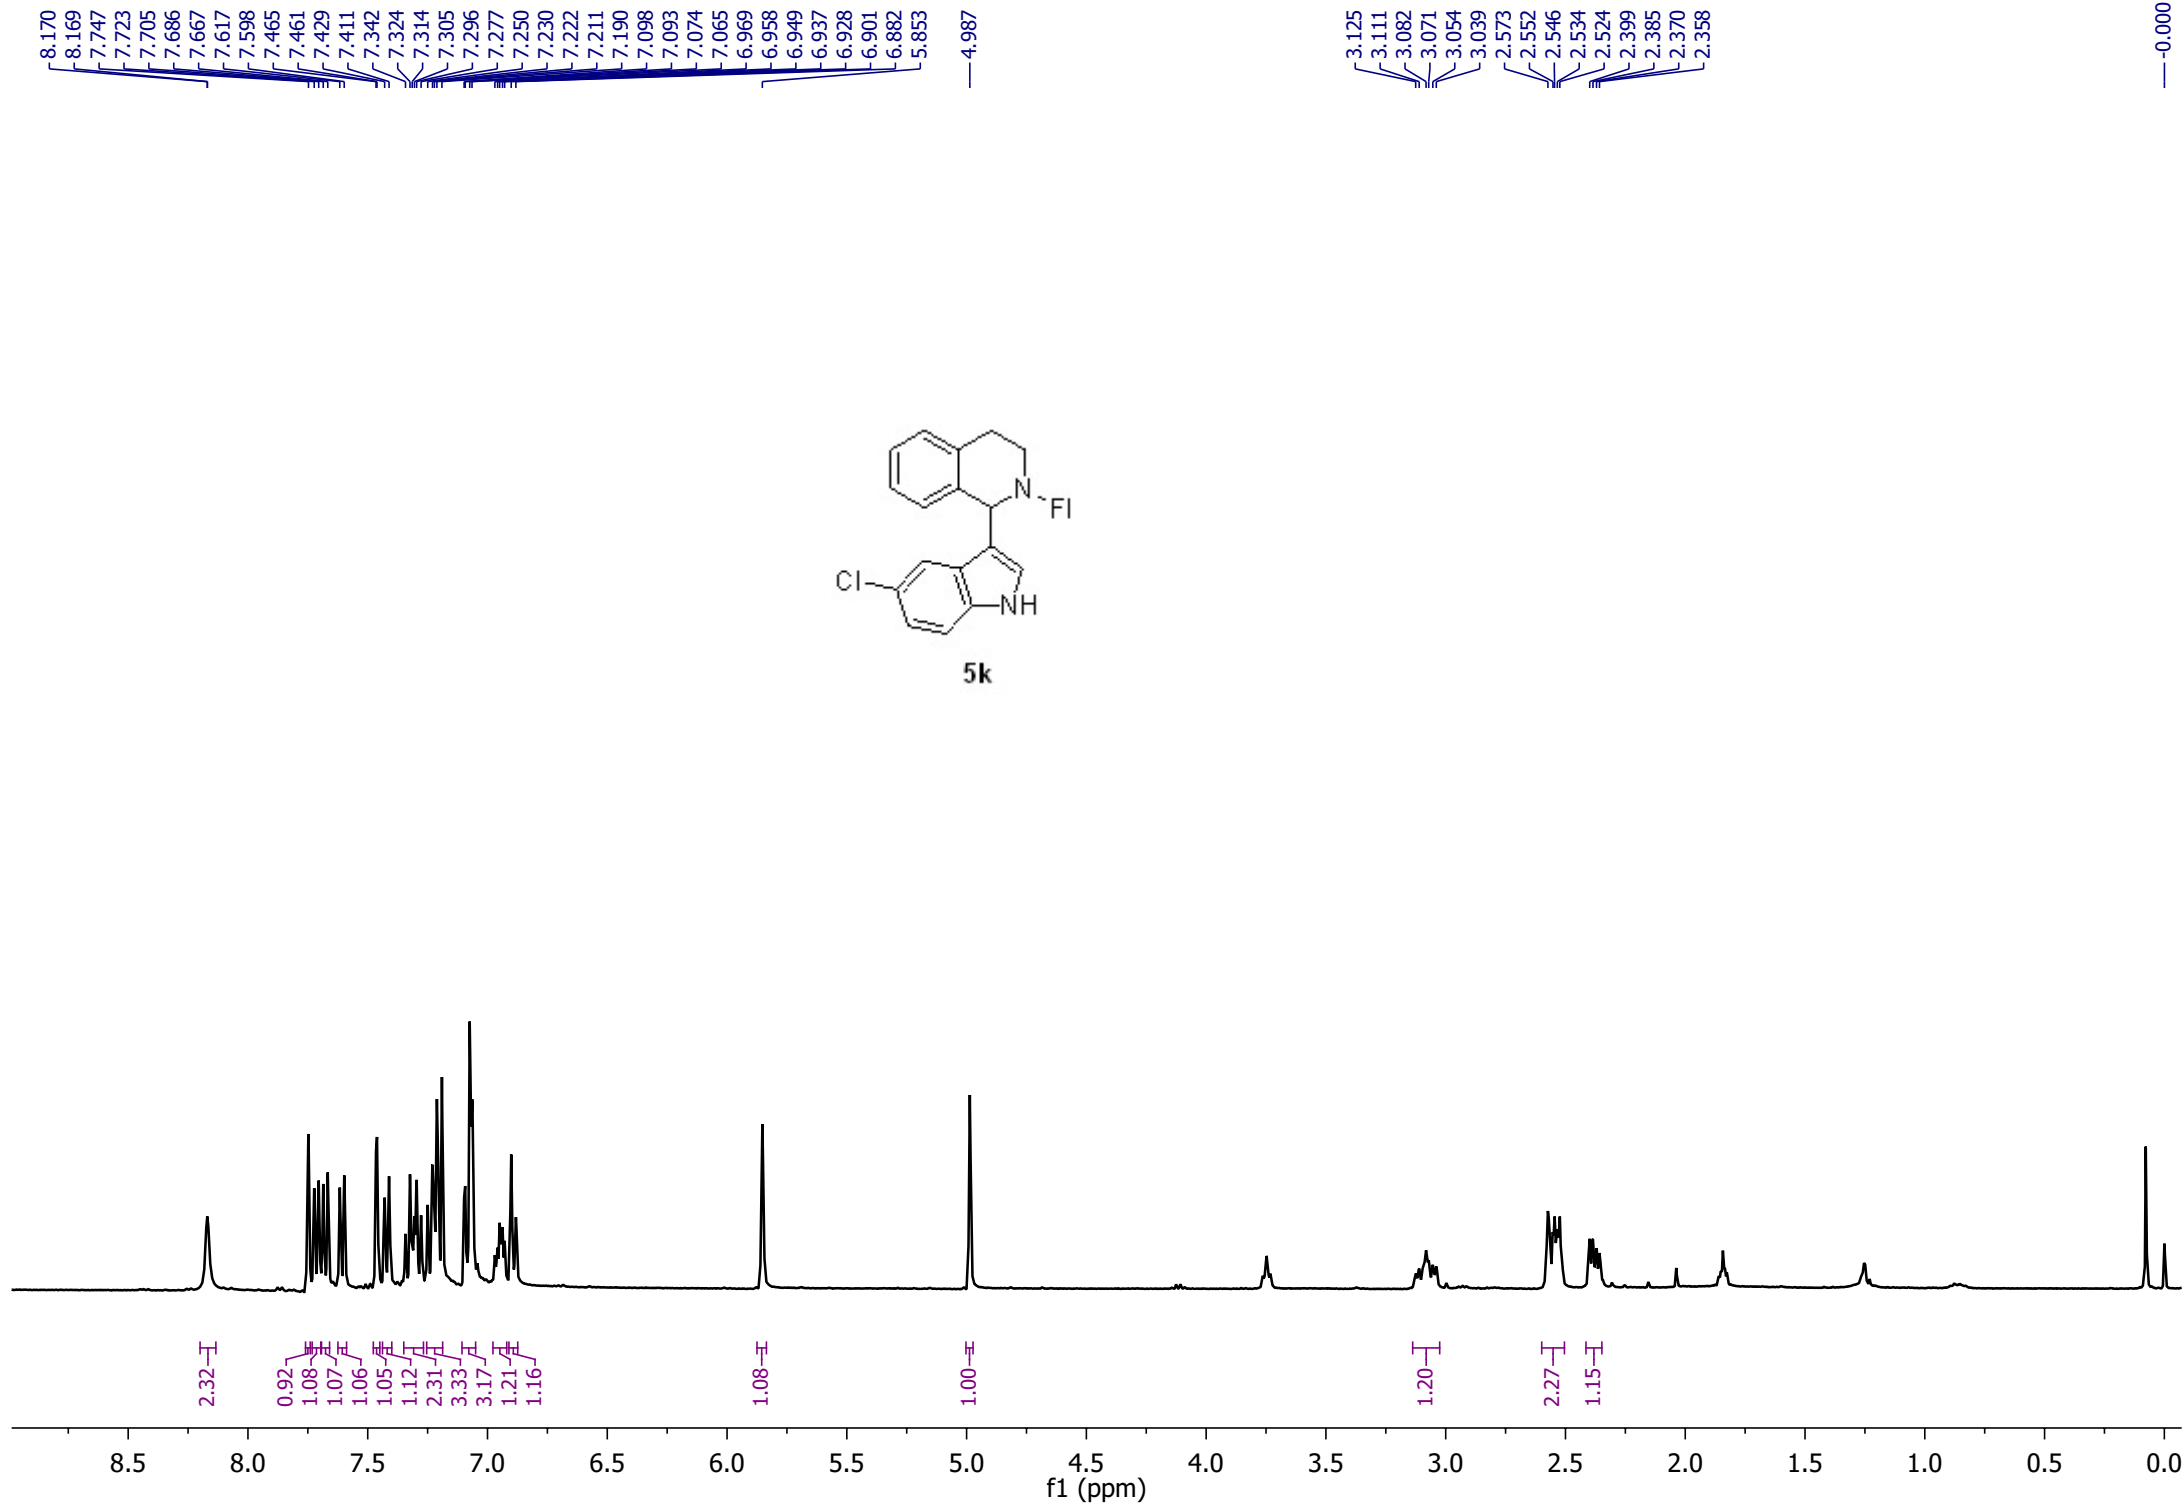

146.135  
144.581  
141.640  
140.676  
138.793  
135.786  
135.356  
128.813  
127.932  
127.910  
127.669  
127.390  
126.560  
126.143  
126.127  
125.790  
125.727  
125.221  
122.929  
121.089  
120.341  
119.343  
118.192  
112.341

77.547  
77.230  
76.912

65.322

60.697

43.900

30.725

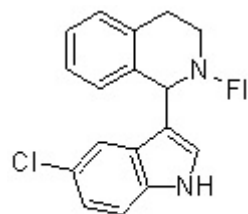

5k

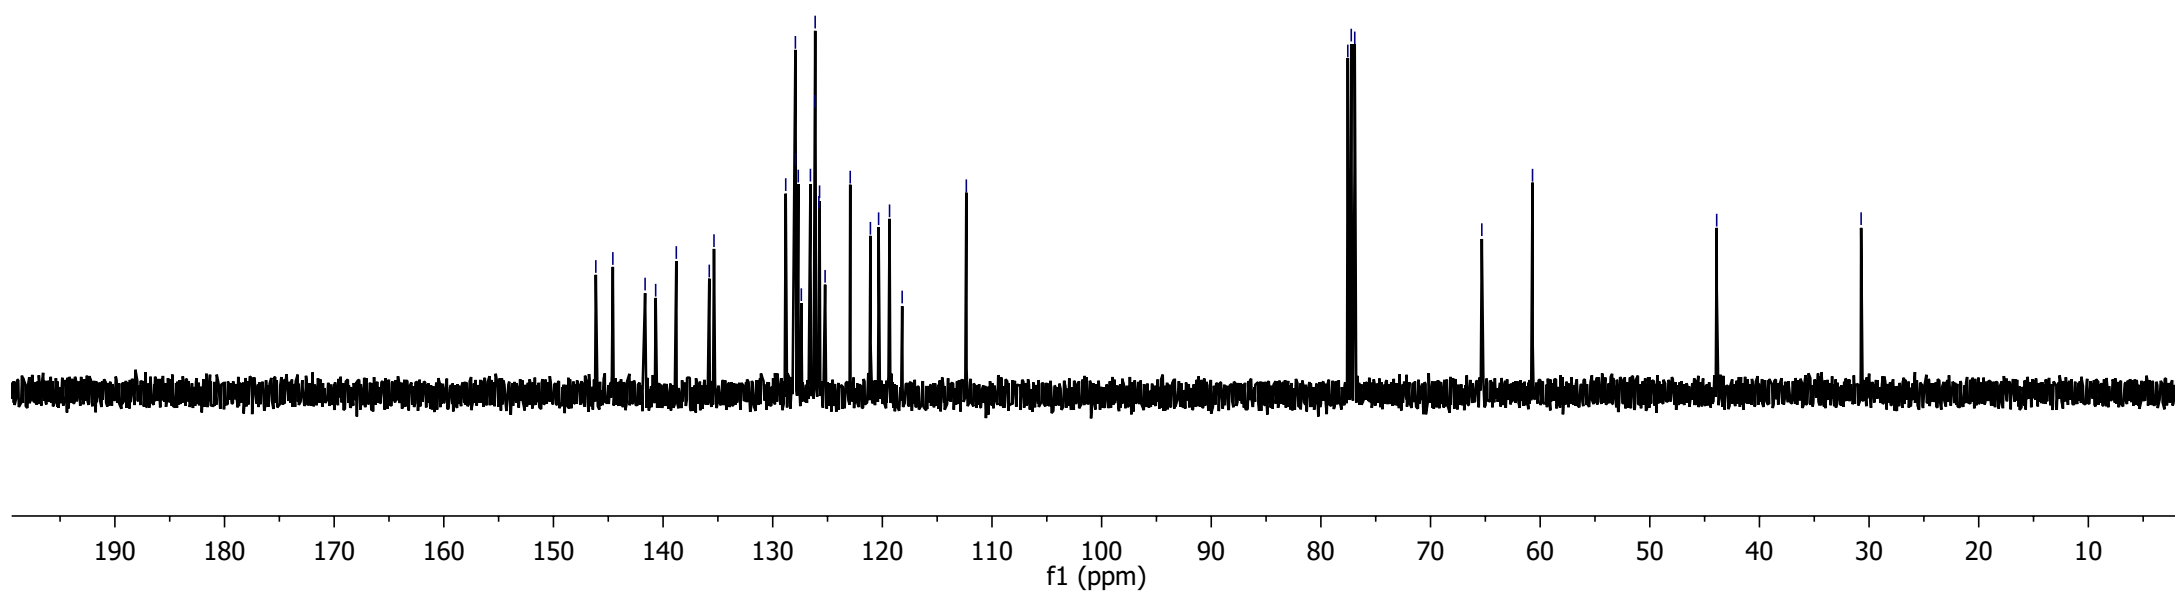

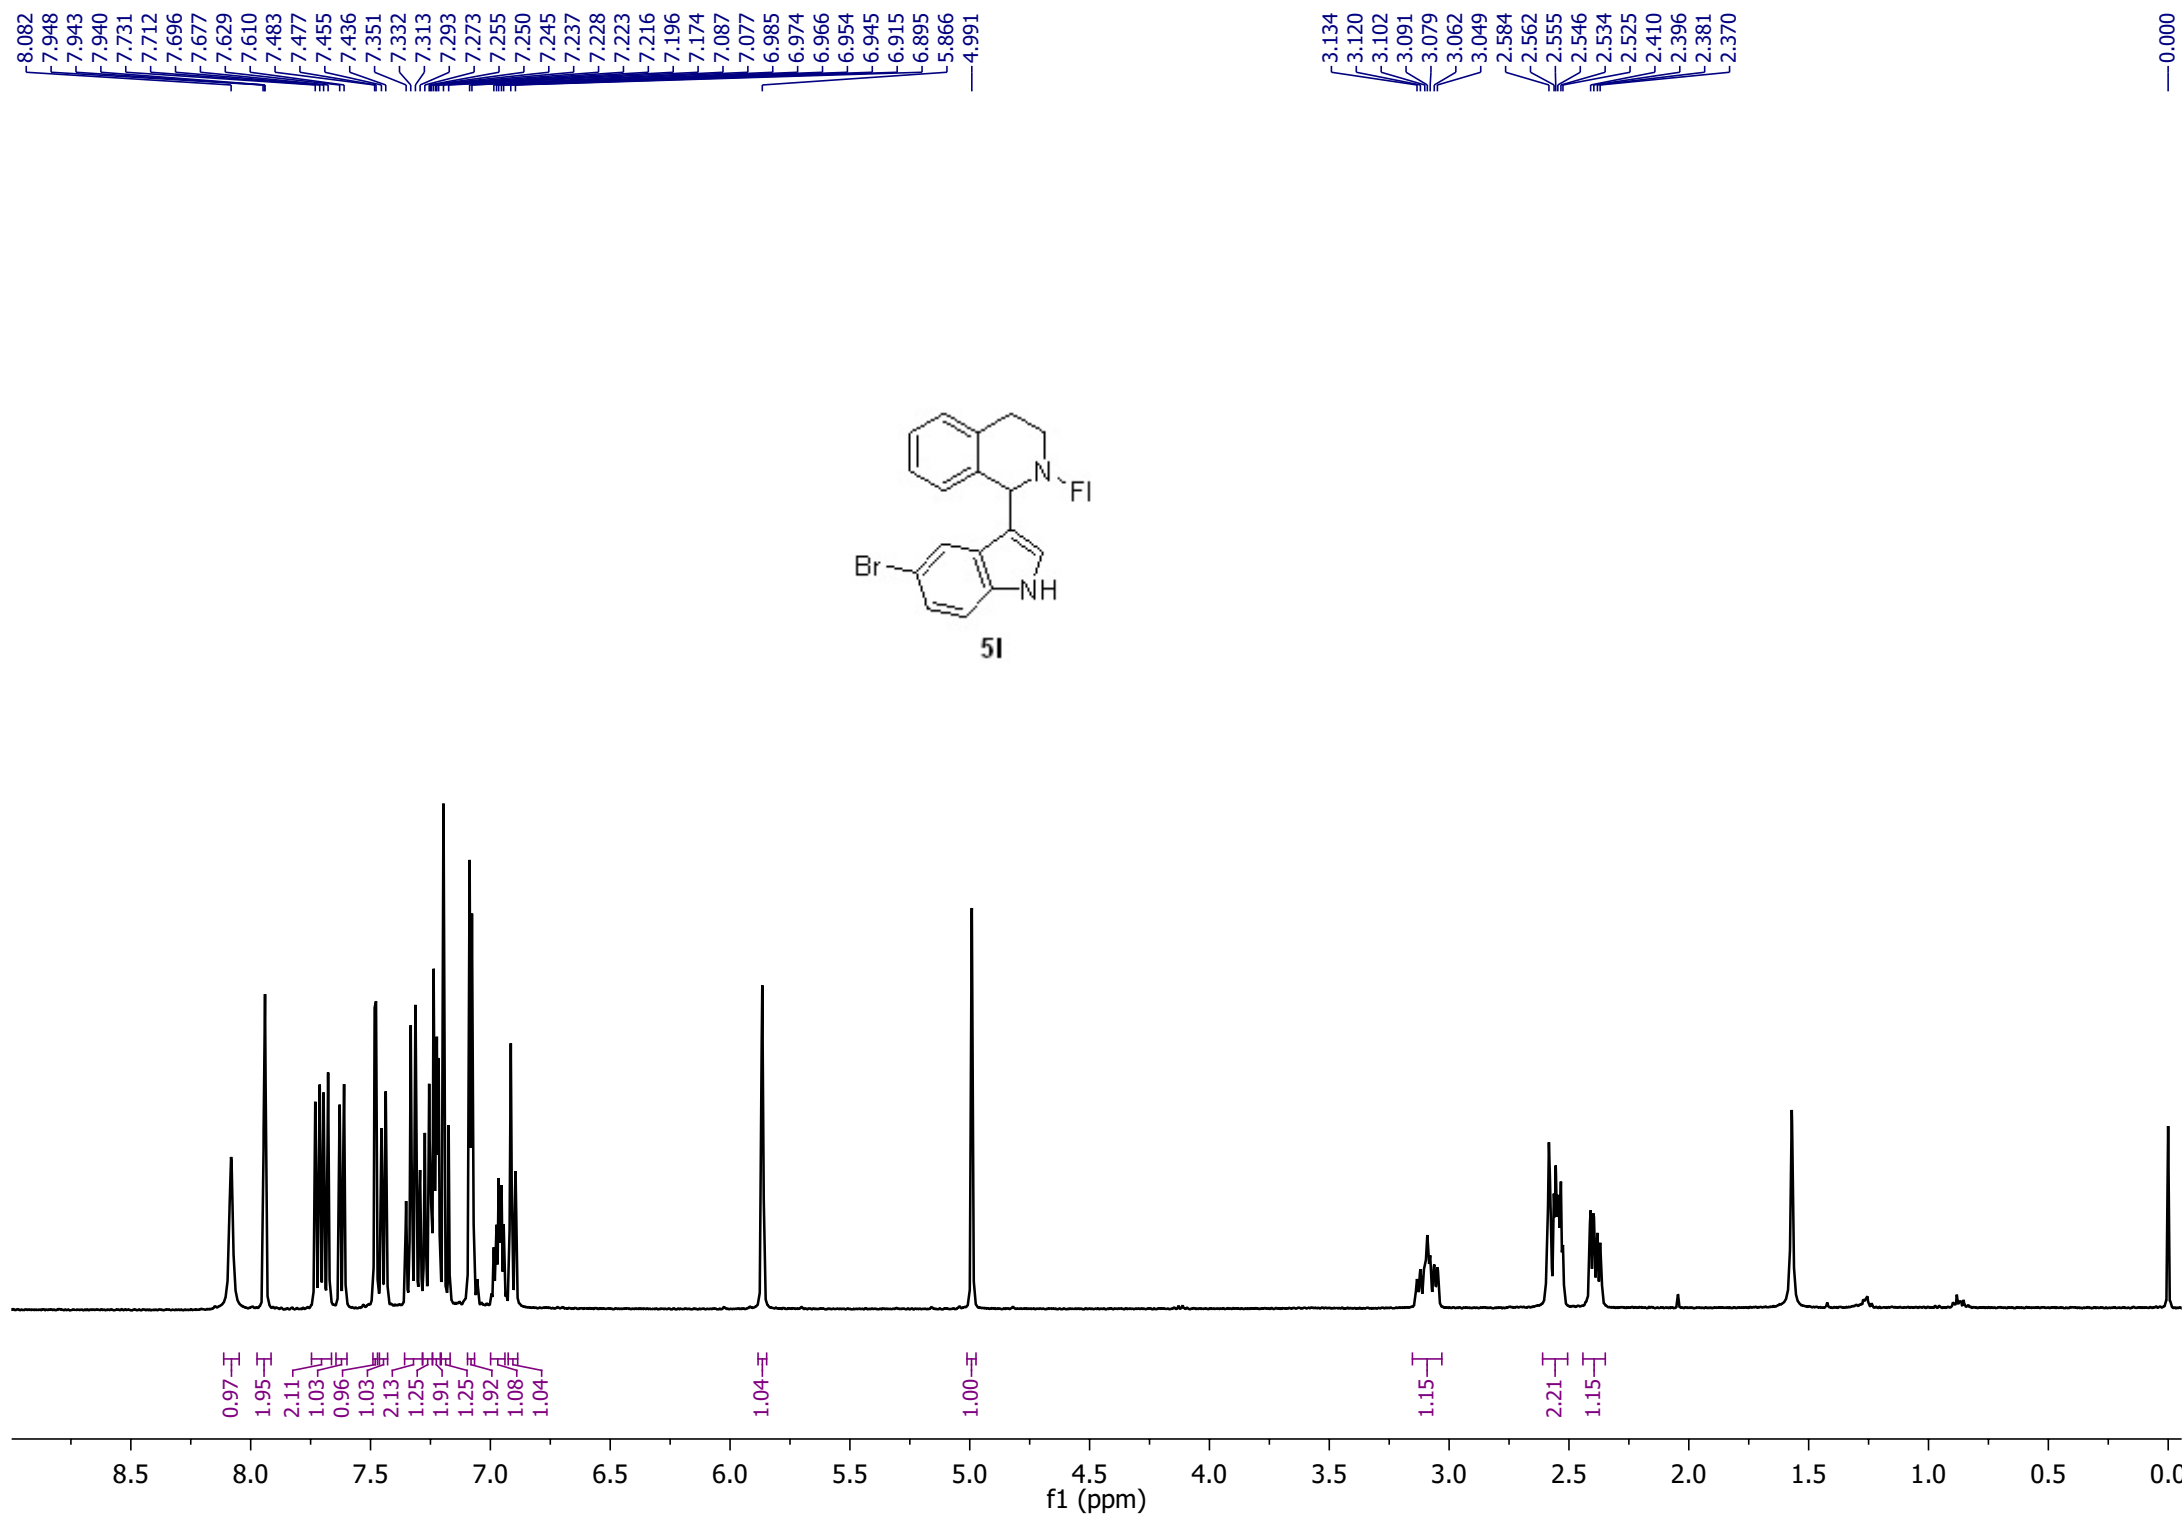

146.086  
144.545  
141.635  
140.667  
138.724  
136.014  
135.333  
128.843  
128.024  
127.940  
127.915  
127.698  
126.557  
126.170  
126.117  
125.878  
125.839  
125.802  
125.744  
125.521  
124.260  
120.354  
119.360  
118.167  
112.930  
112.771

77.547  
77.230  
76.912

65.334

60.683

43.894

30.702

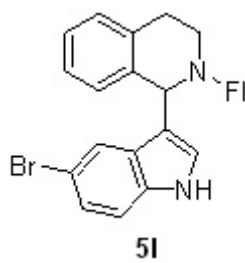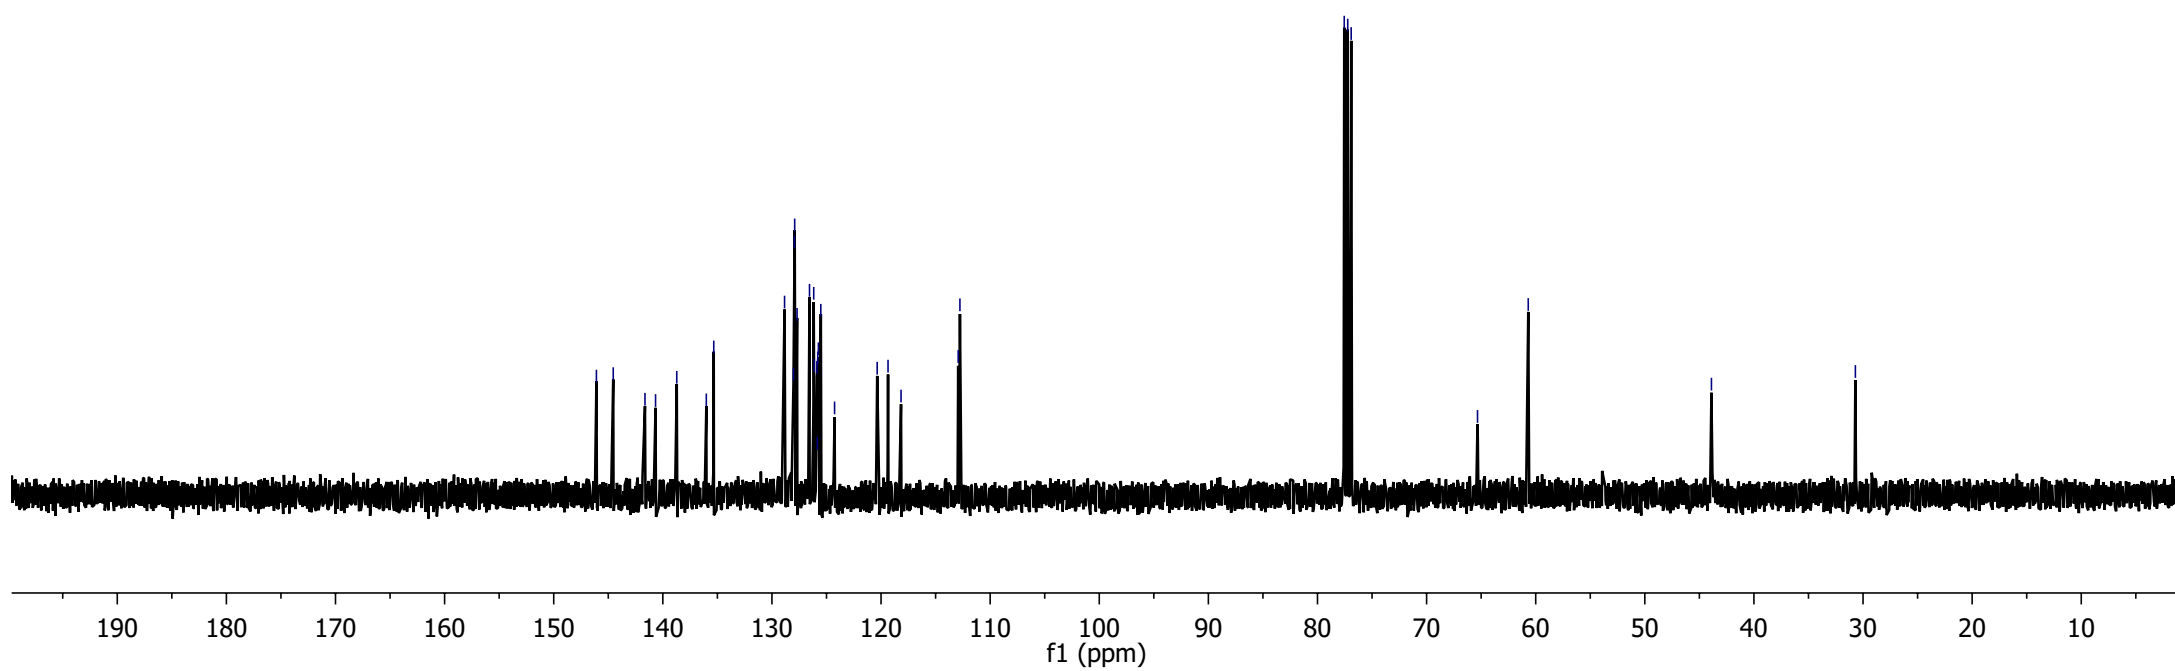



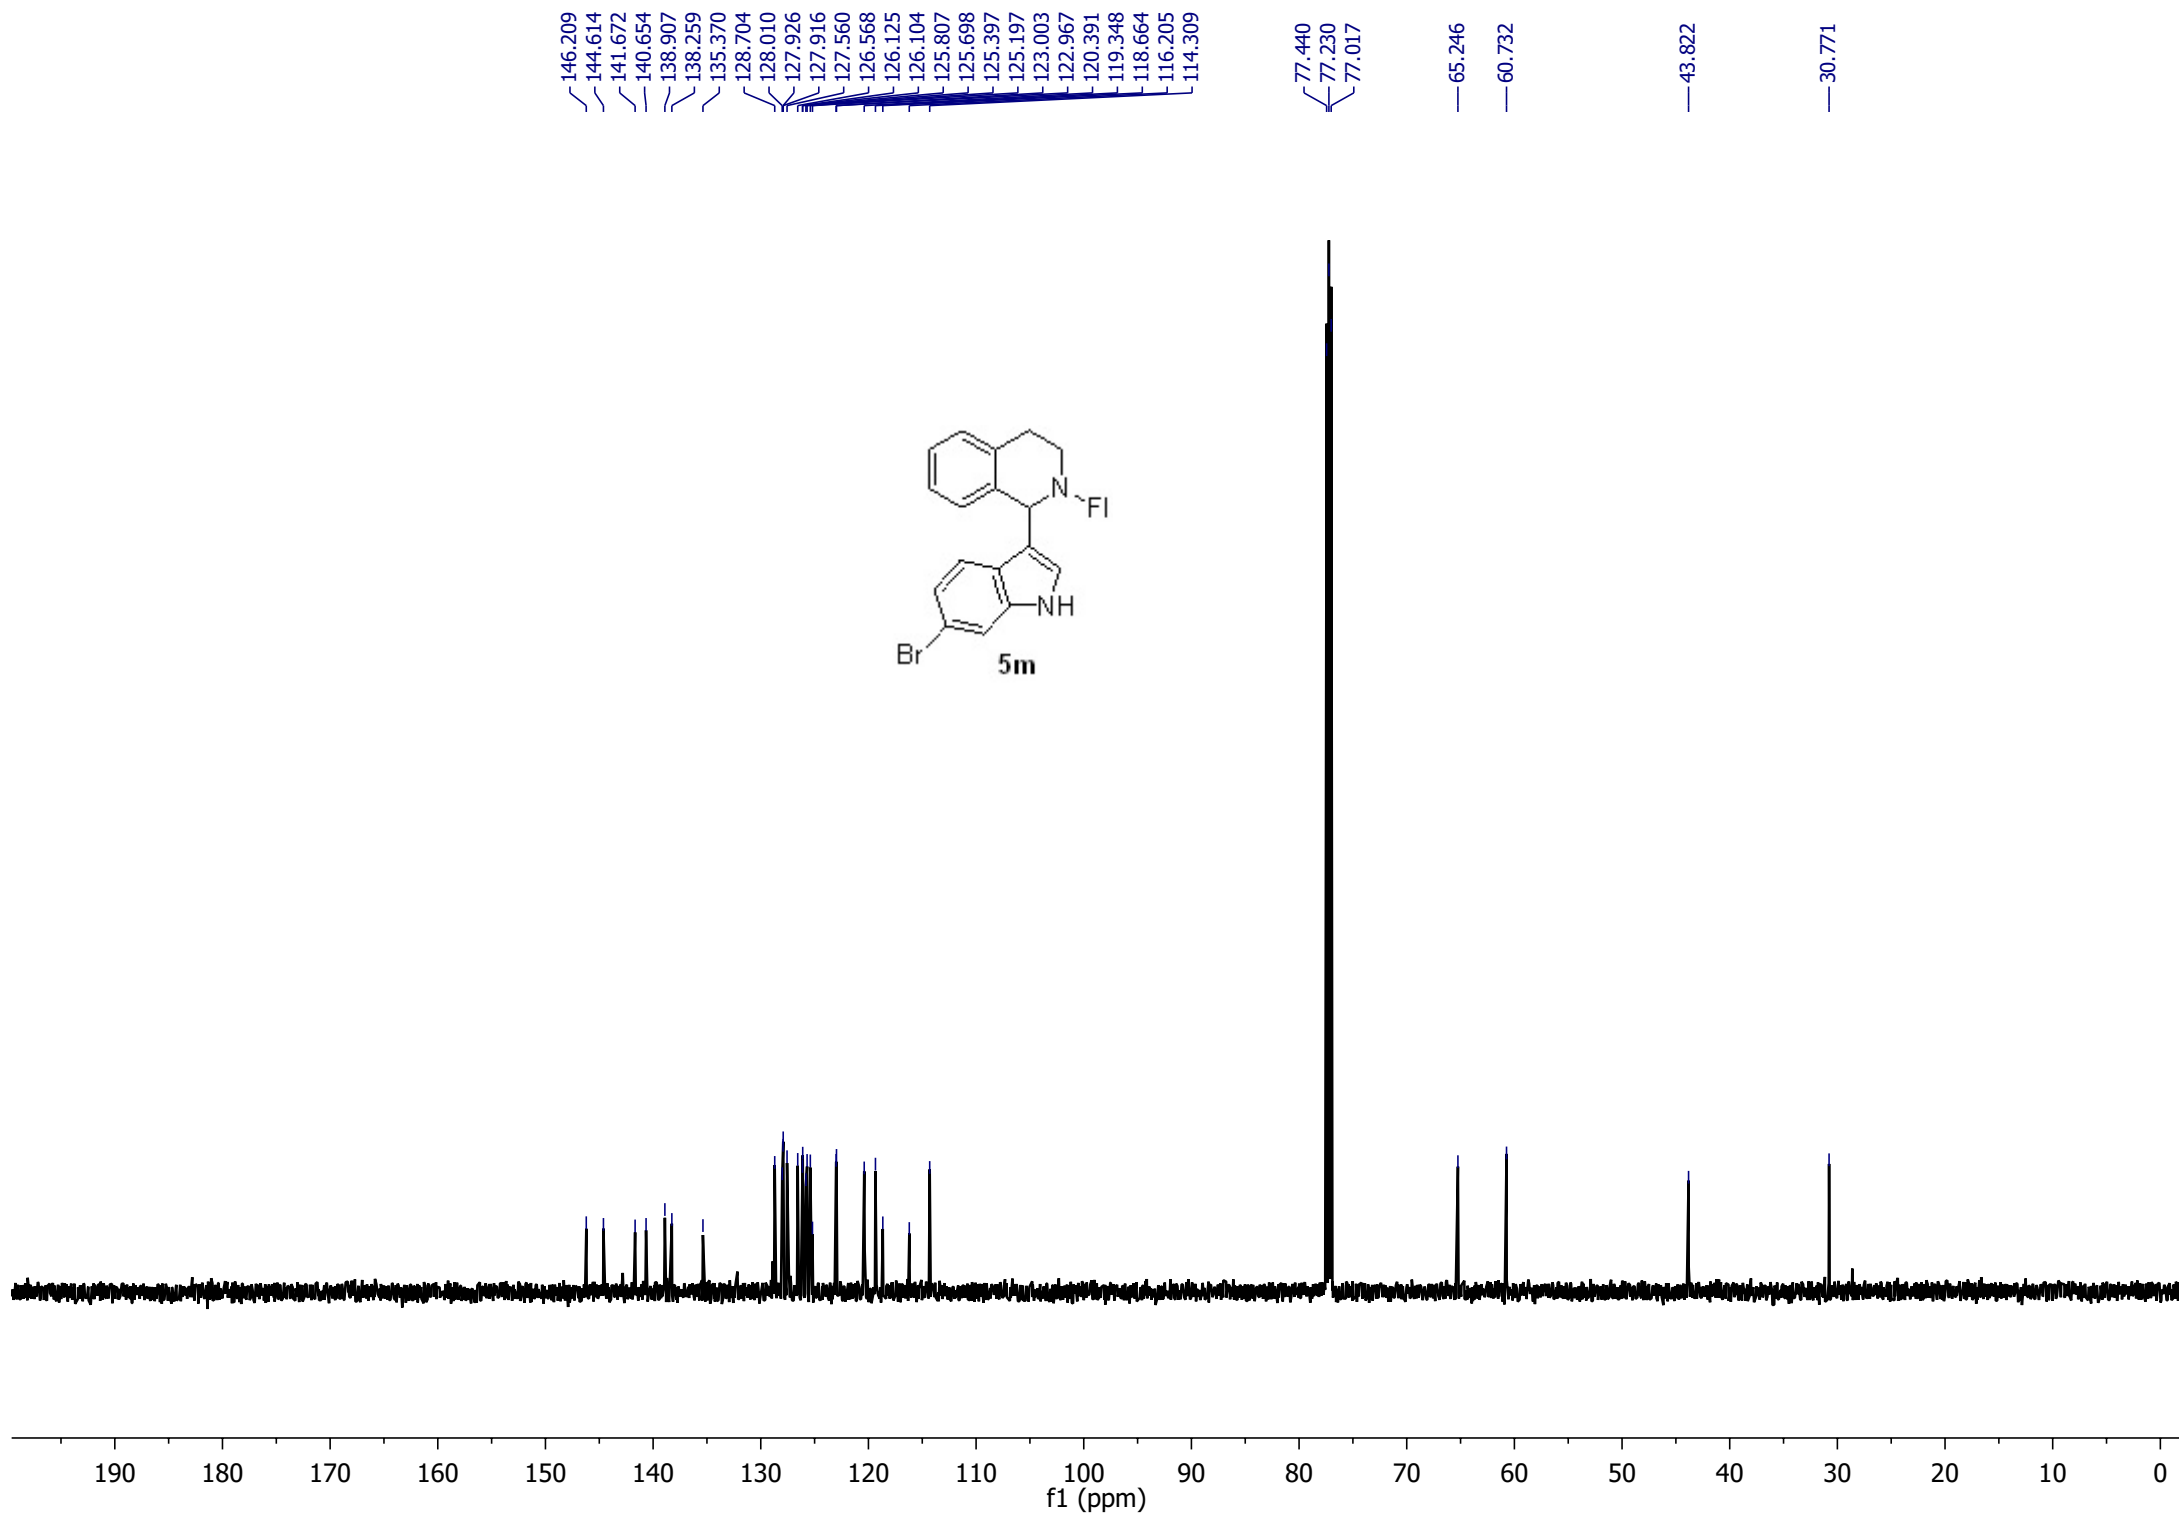

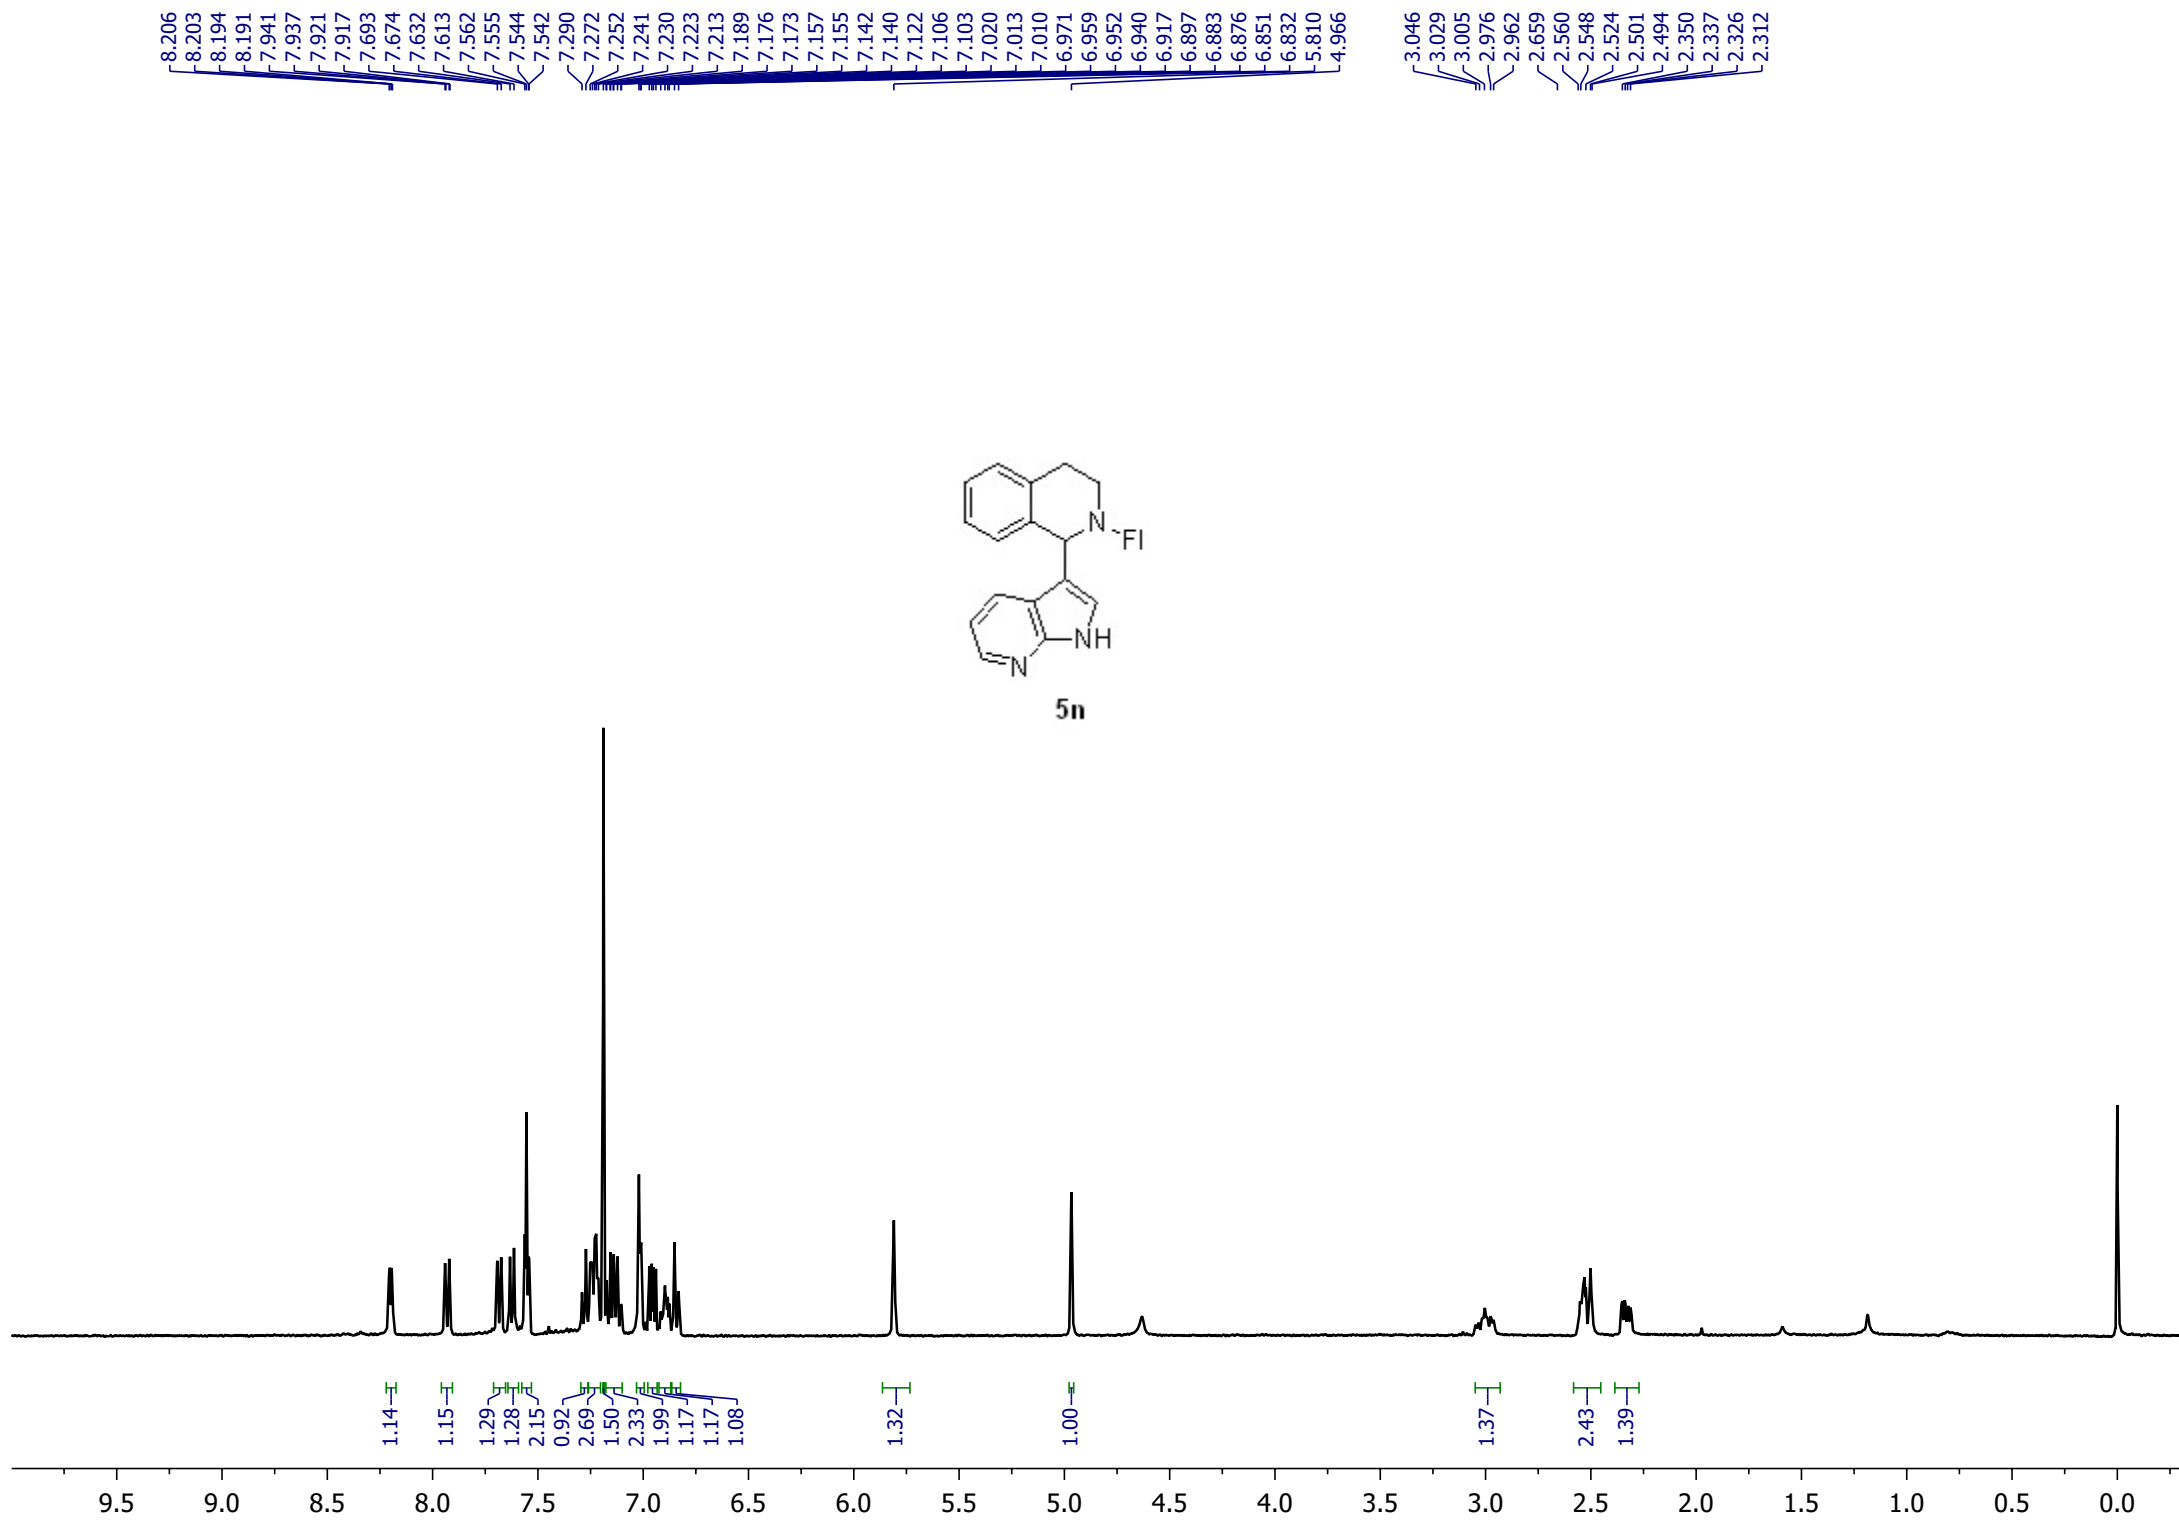

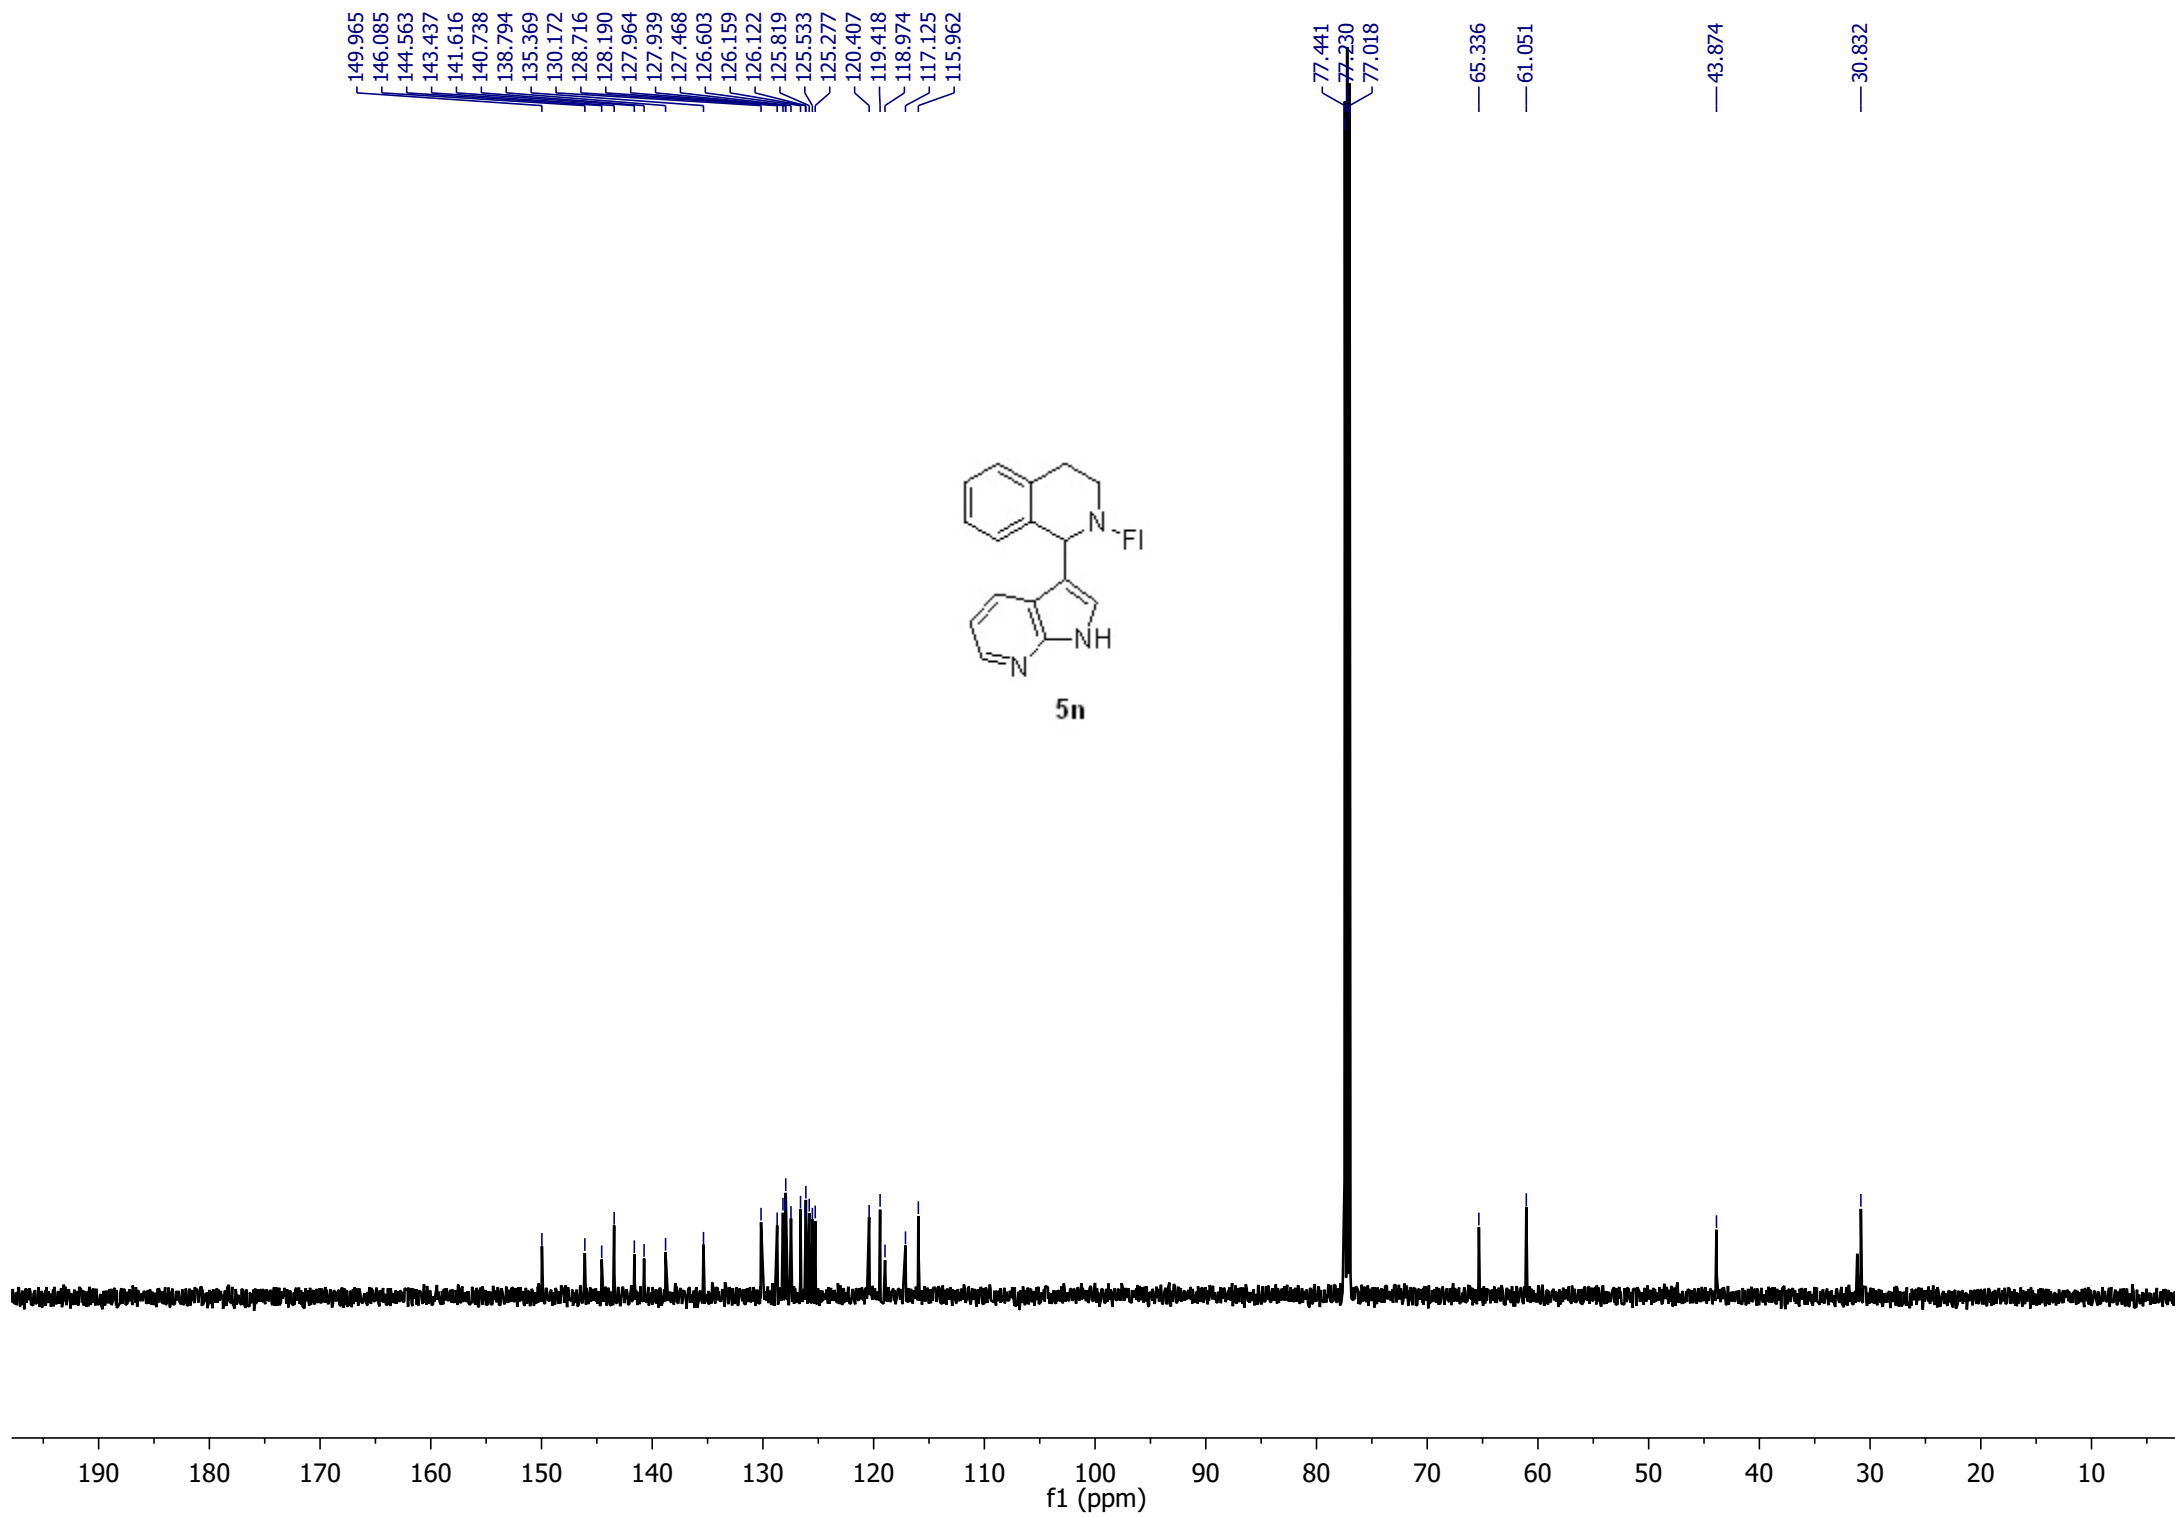

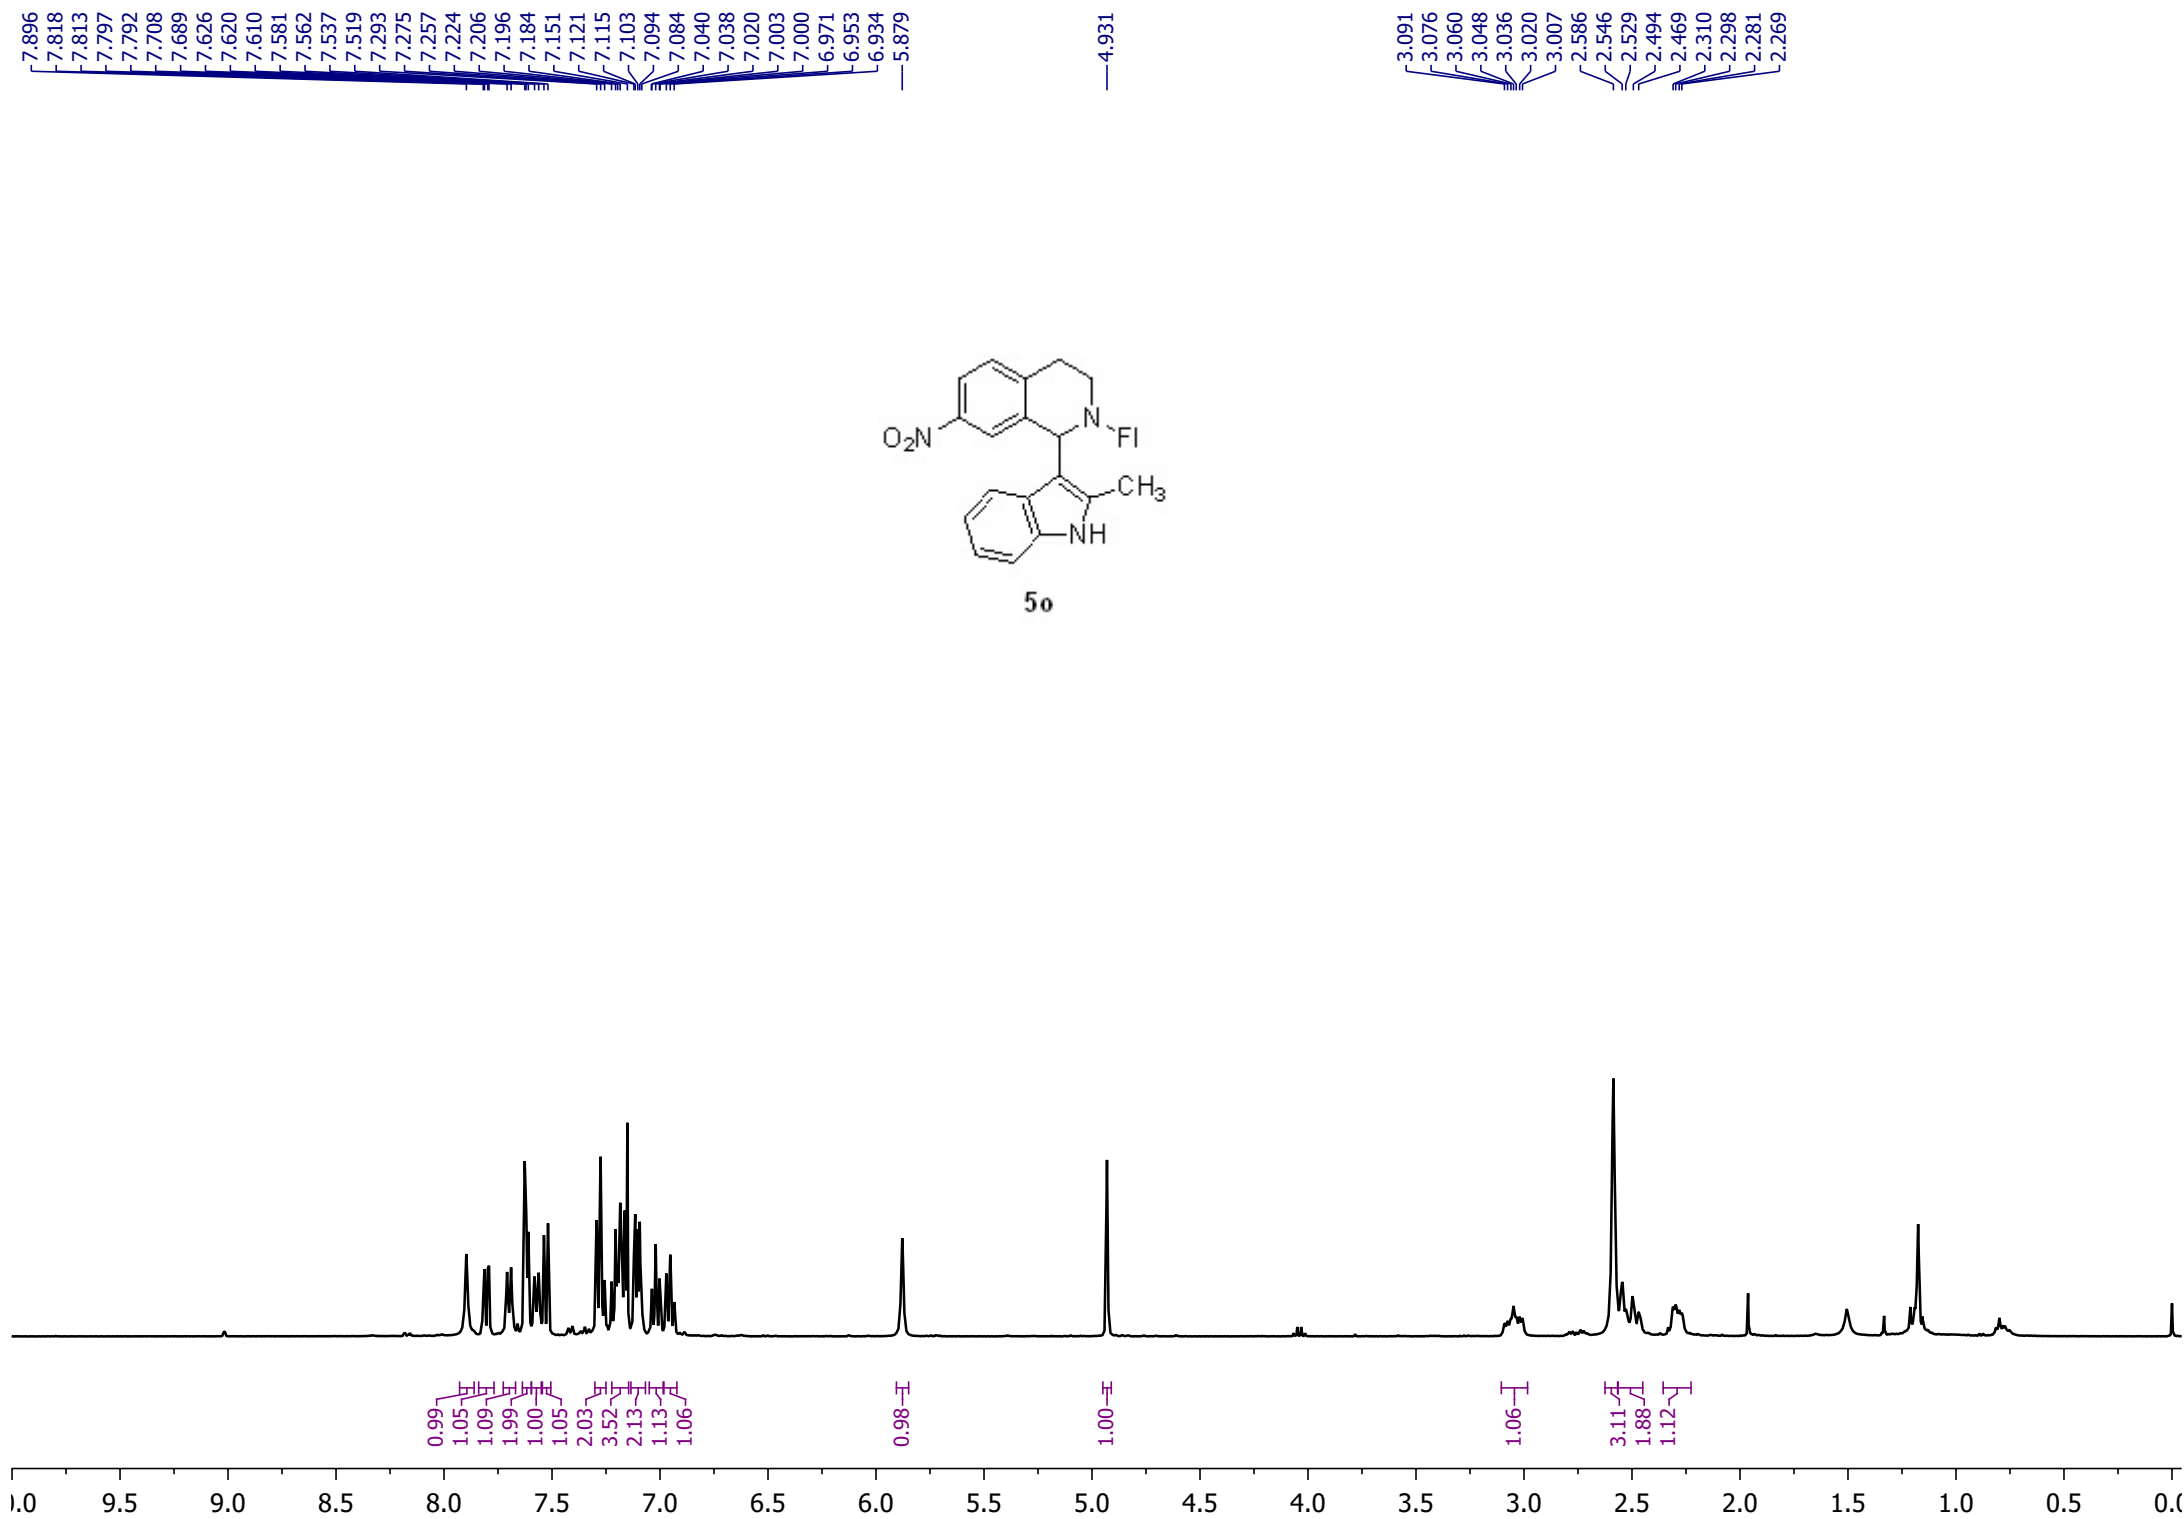

146.597  
146.009  
144.303  
143.457  
141.748  
141.474  
140.610  
136.132  
134.395  
129.592  
128.066  
128.021  
127.638  
126.739  
125.948  
125.773  
123.495  
121.874  
120.987  
120.502  
119.675  
119.369  
112.388  
110.655

65.251

59.516

43.448

31.168

12.738

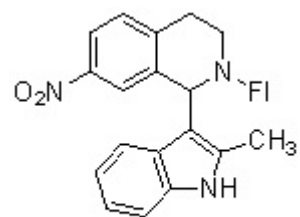

5o

190 180 170 160 150 140 130 120 110 100 90 80 70 60 50 40 30 20 10

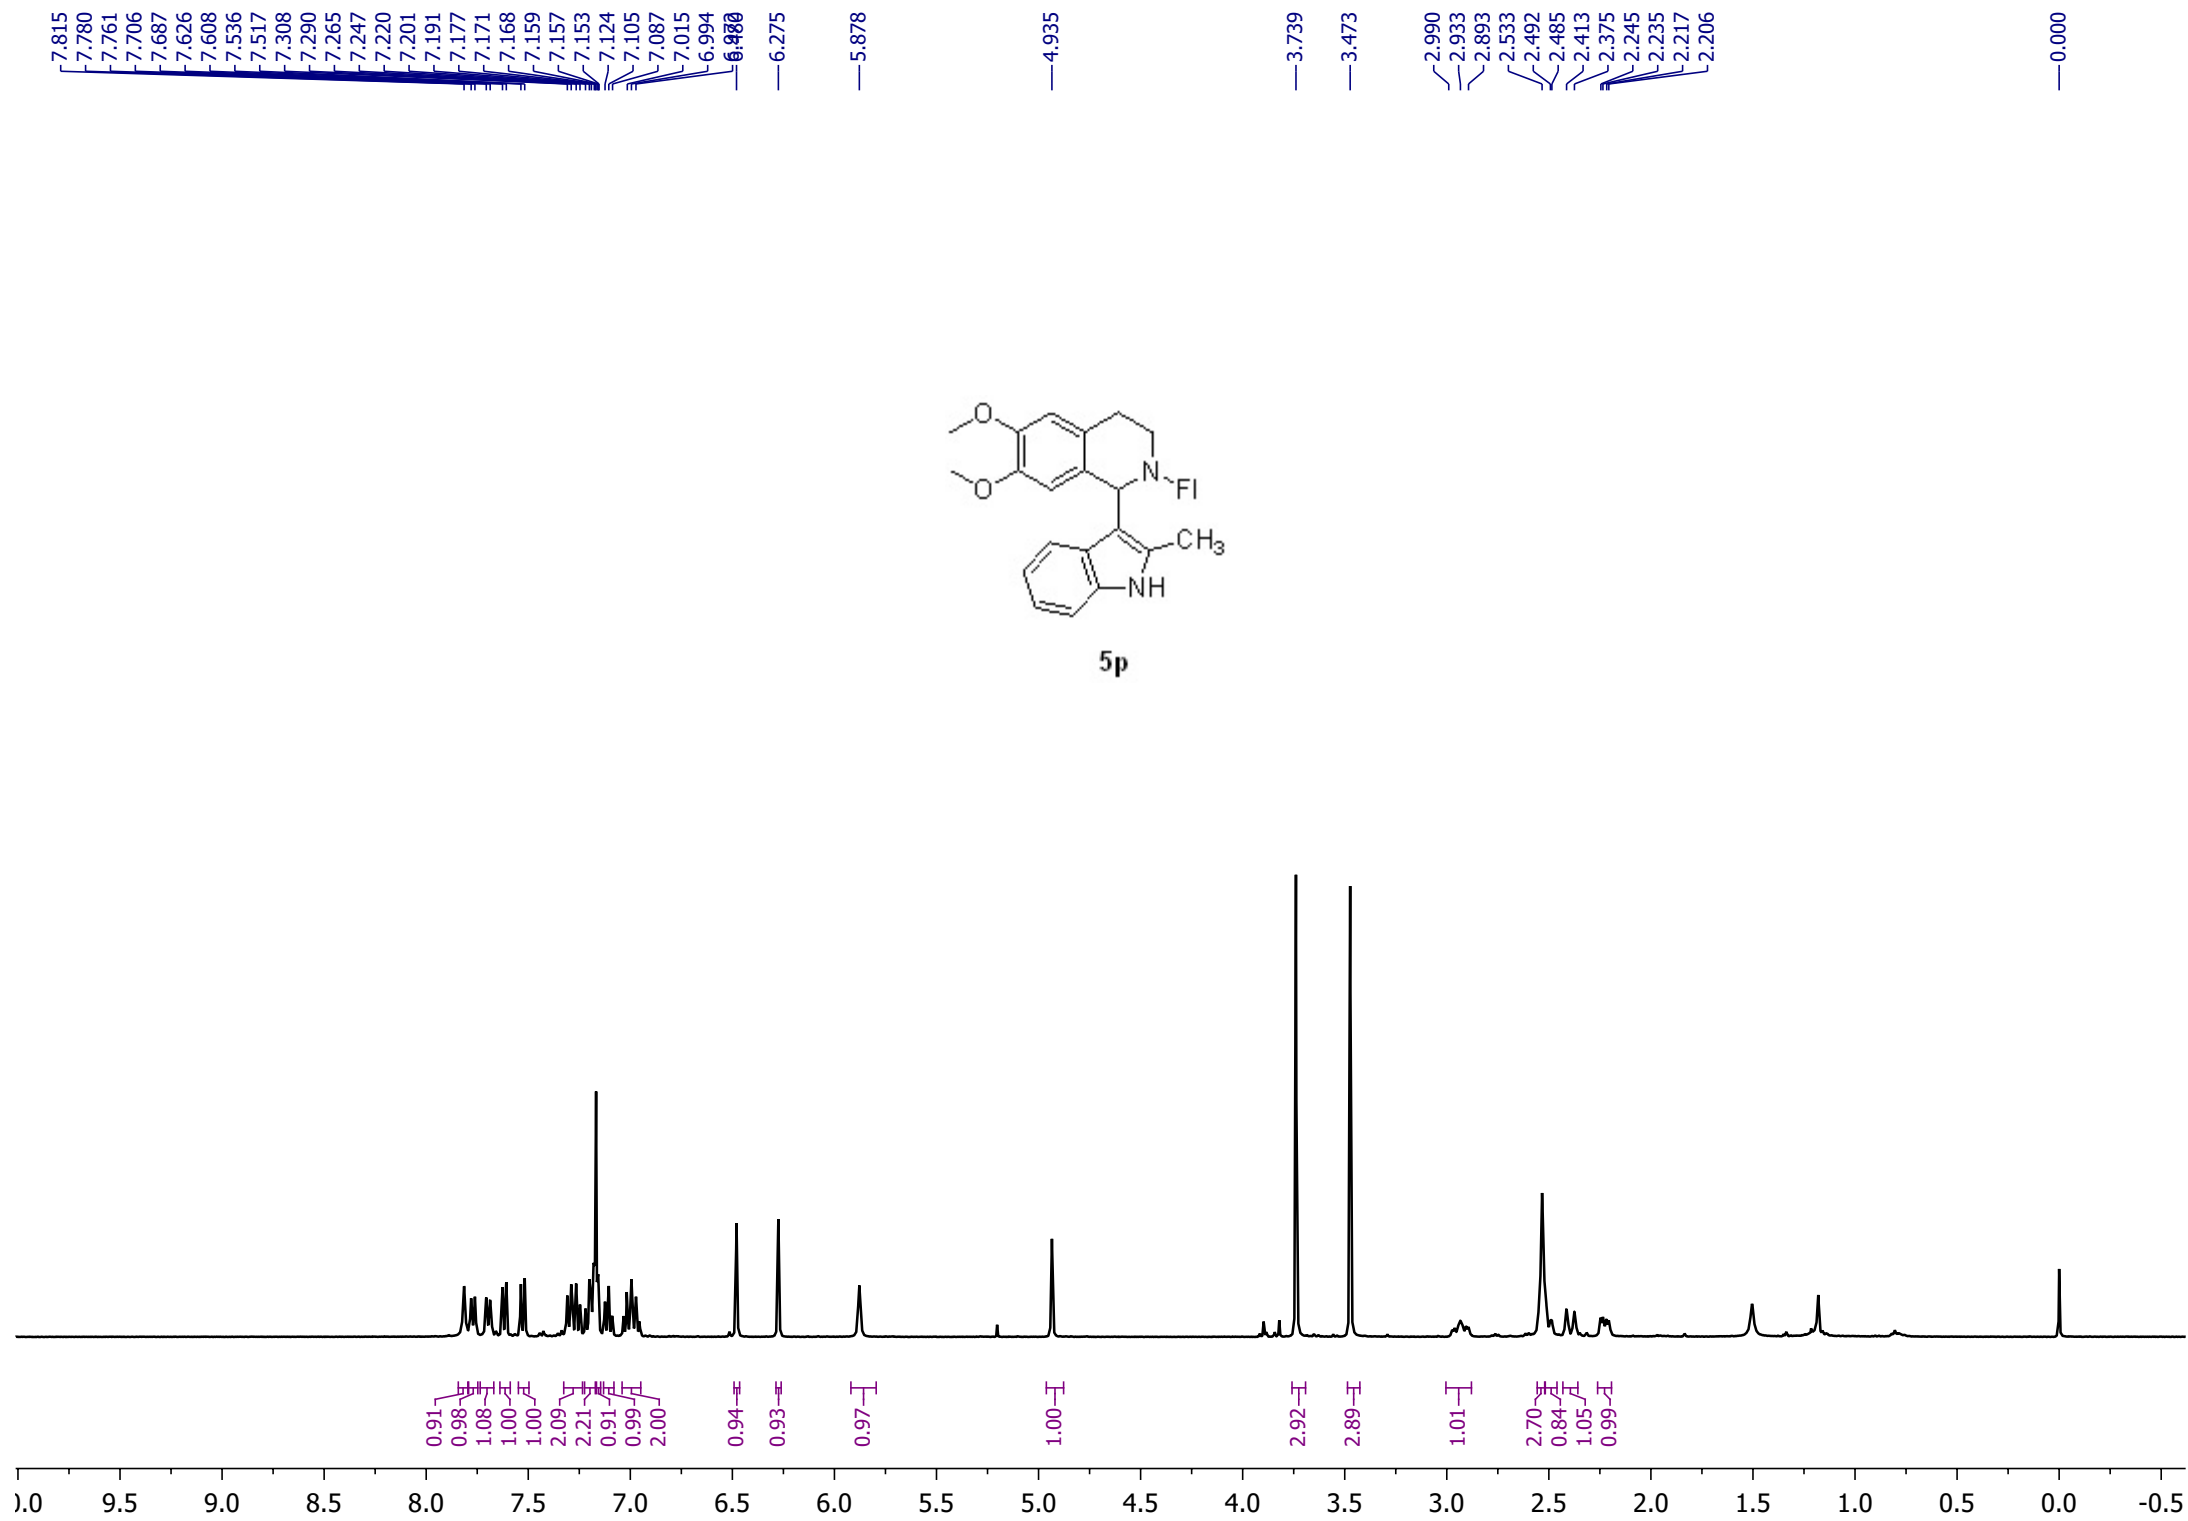

147.397  
147.277  
146.746  
144.946  
141.705  
140.533  
135.867  
133.764  
131.643  
127.772  
127.761  
127.745  
127.464  
126.550  
126.036  
125.944  
121.370  
120.339  
119.456  
119.204  
113.922  
111.349  
111.067  
110.261

65.486

58.875

56.097

55.988

44.190

30.462

12.695

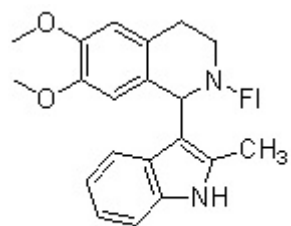

5p

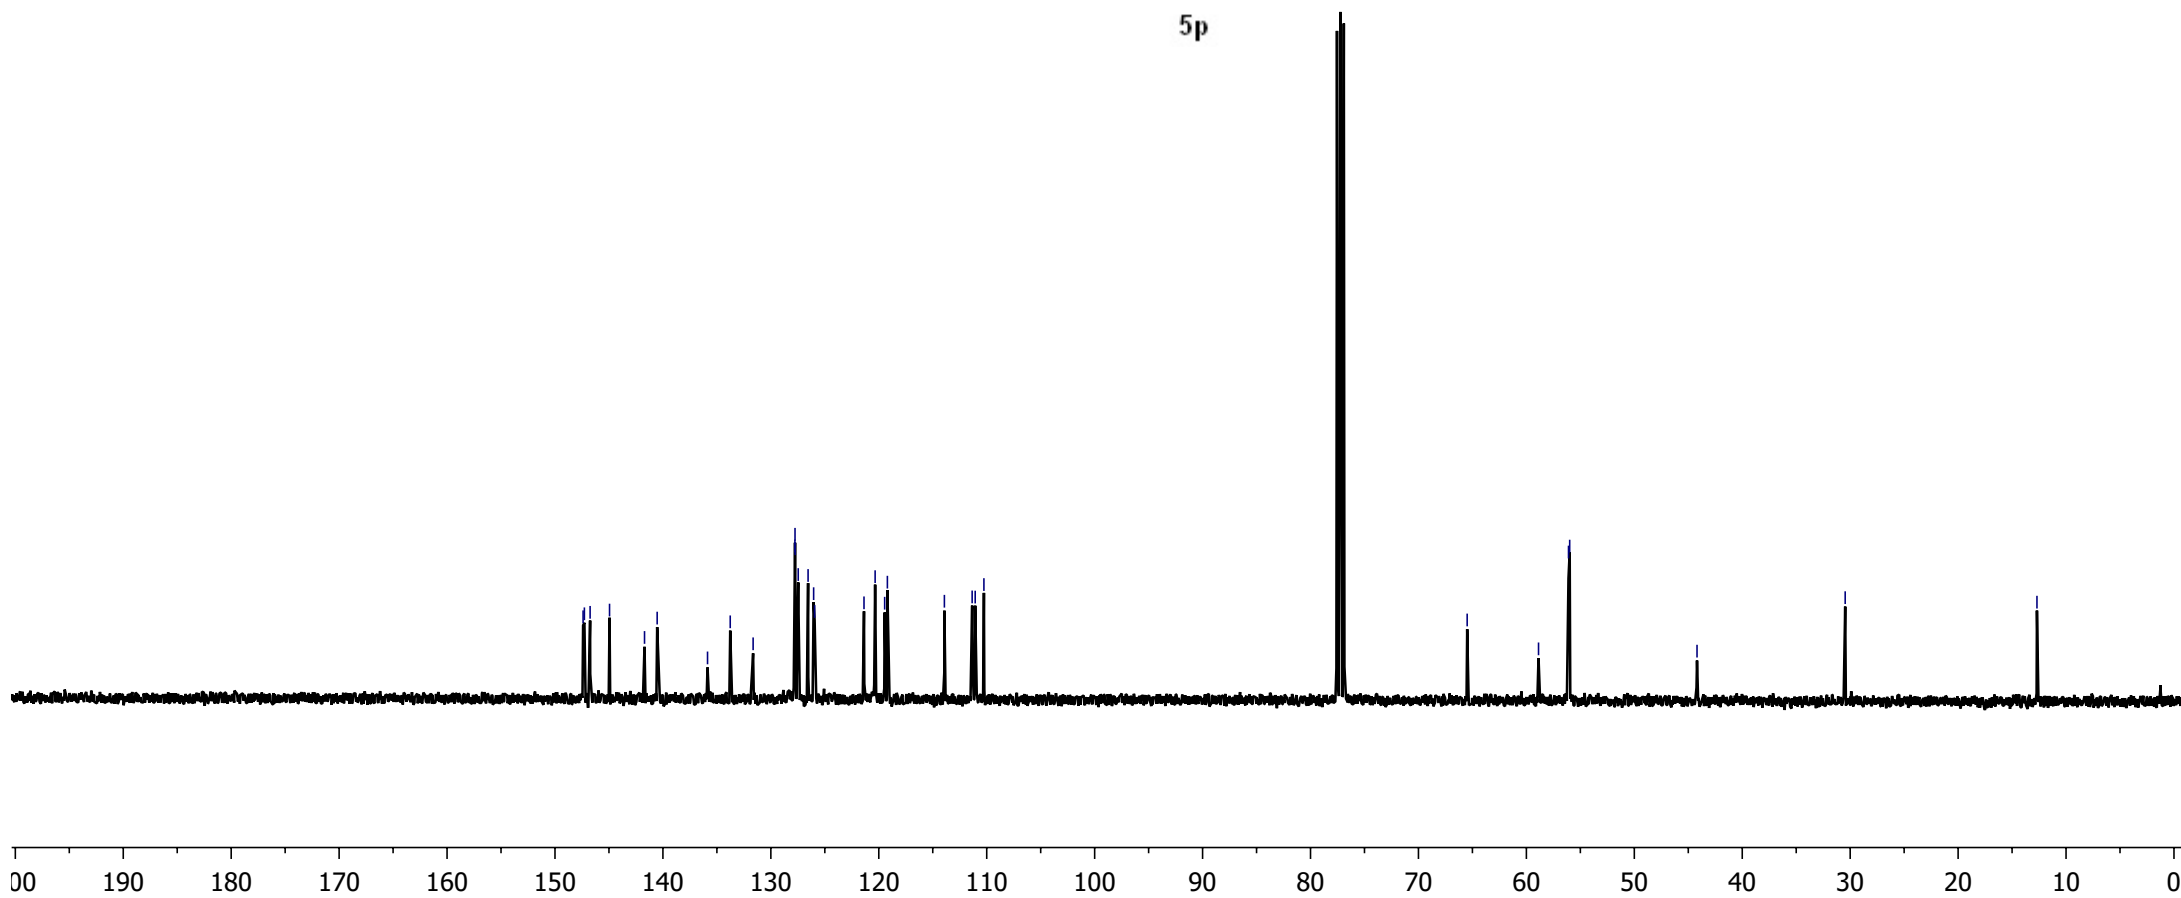

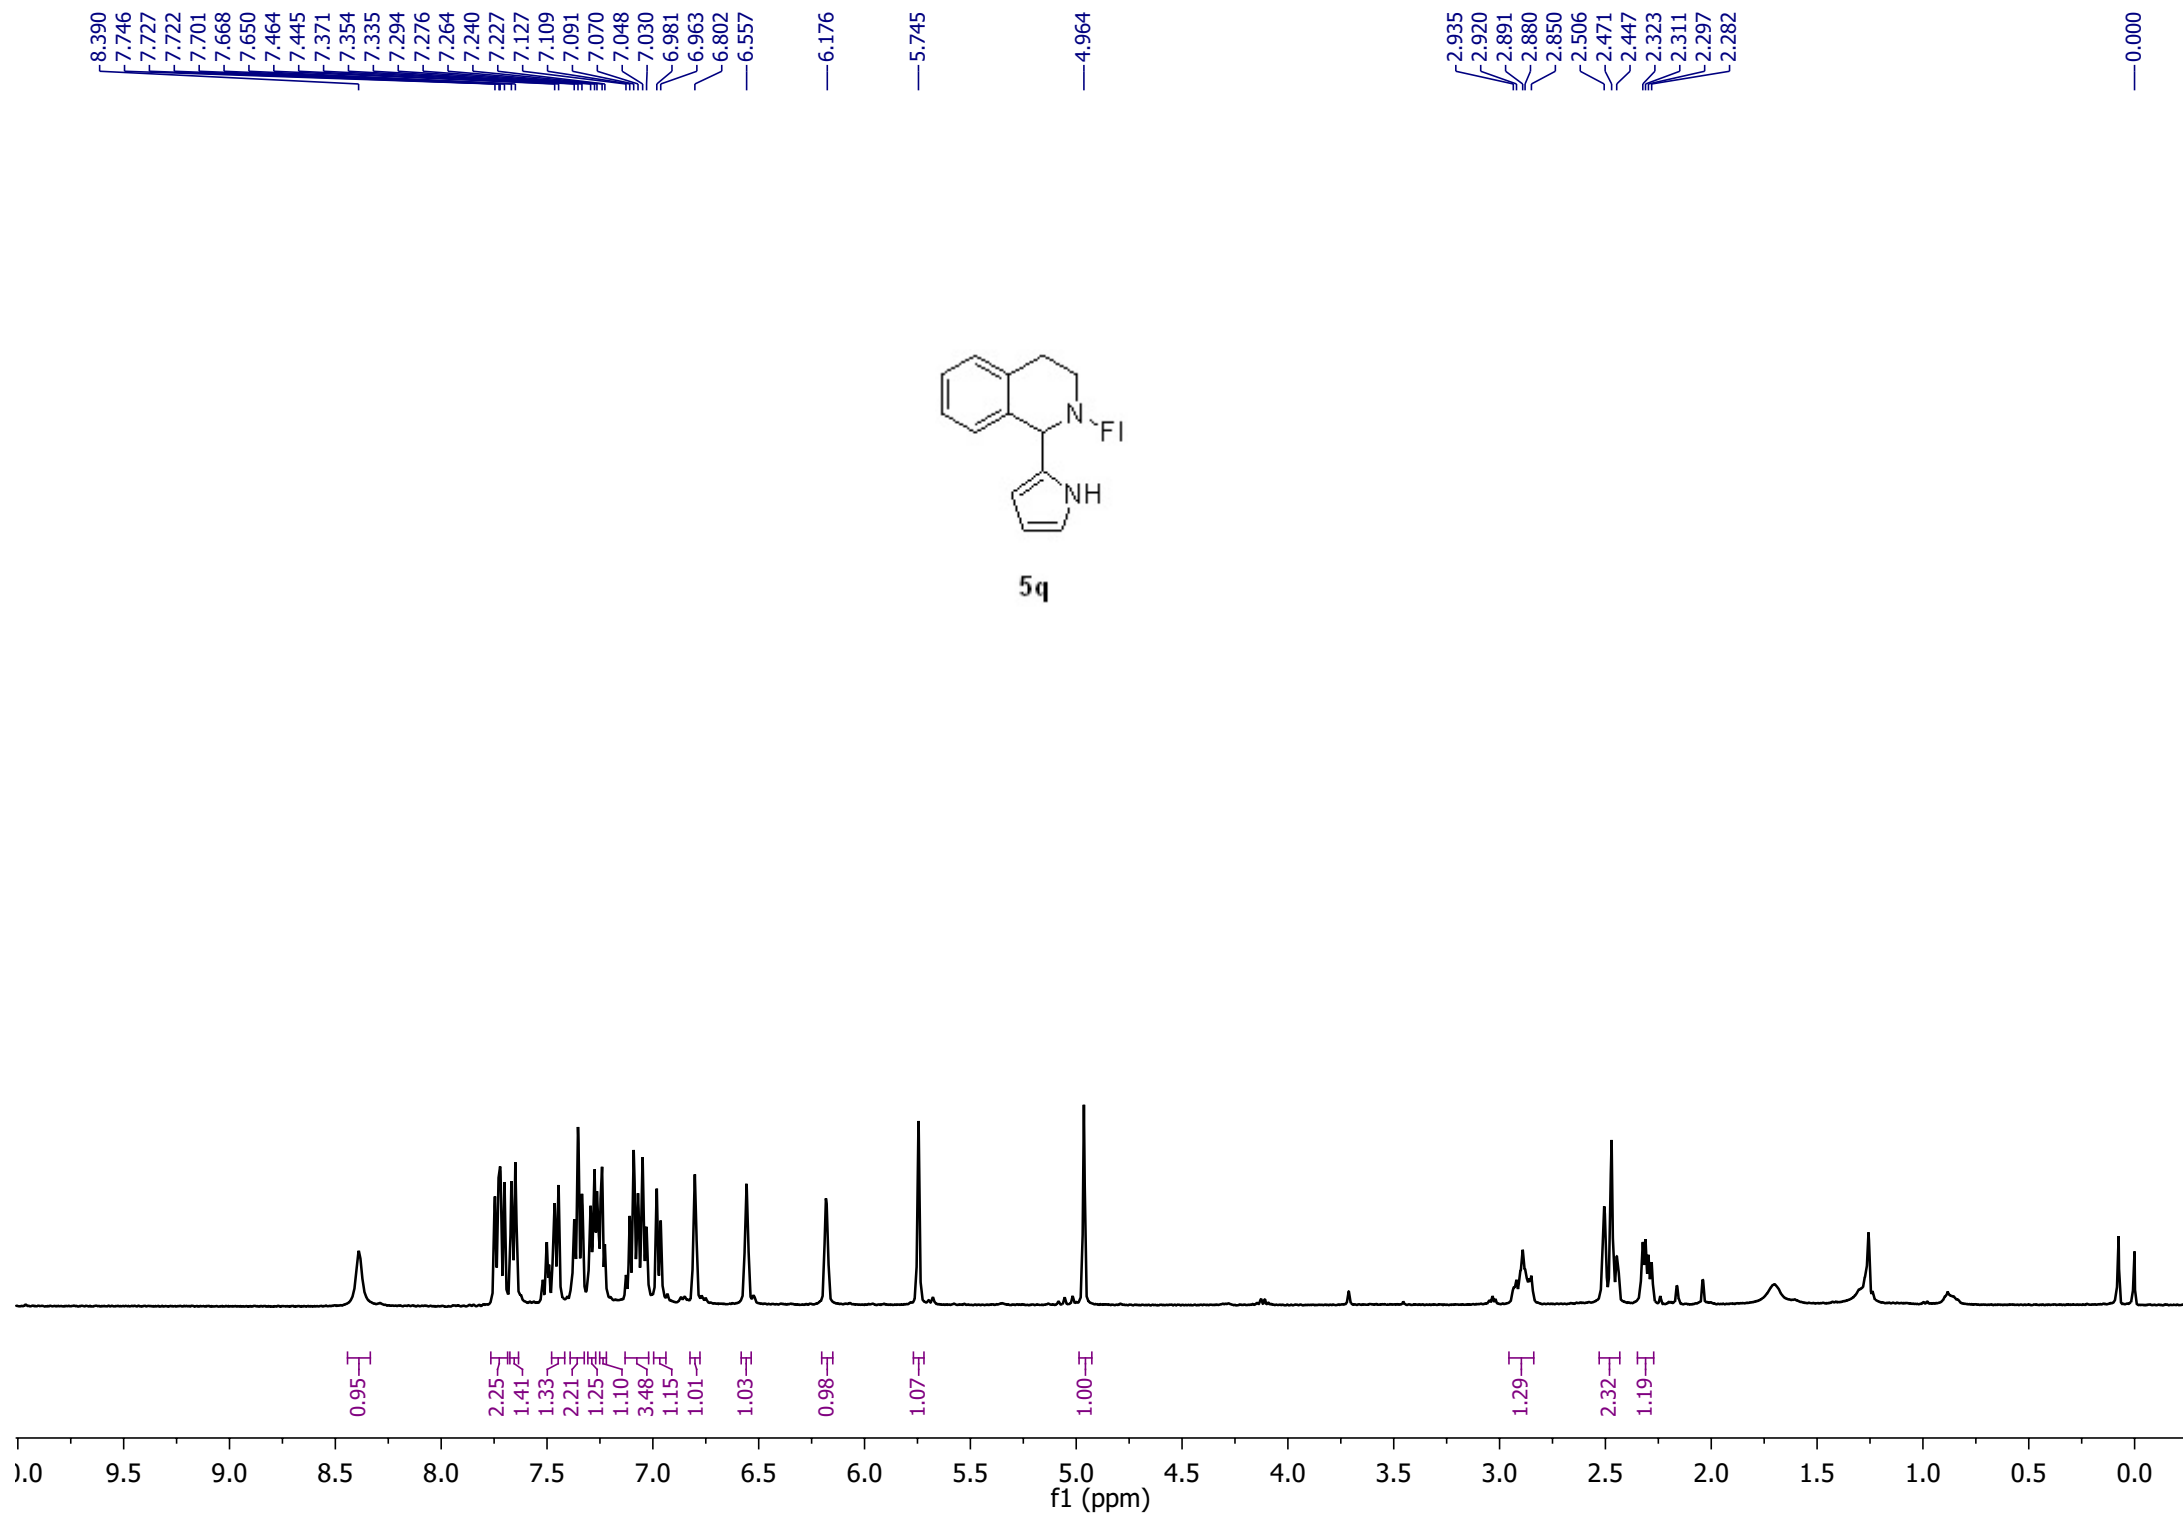

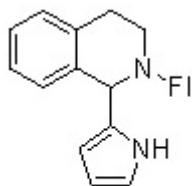

5q

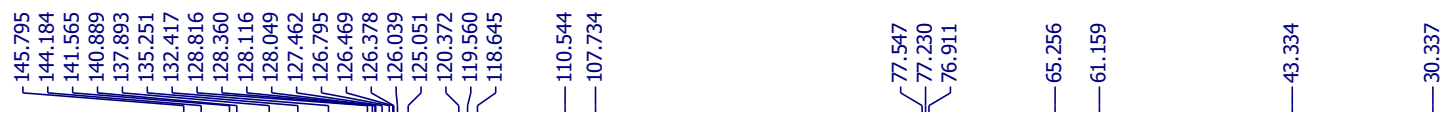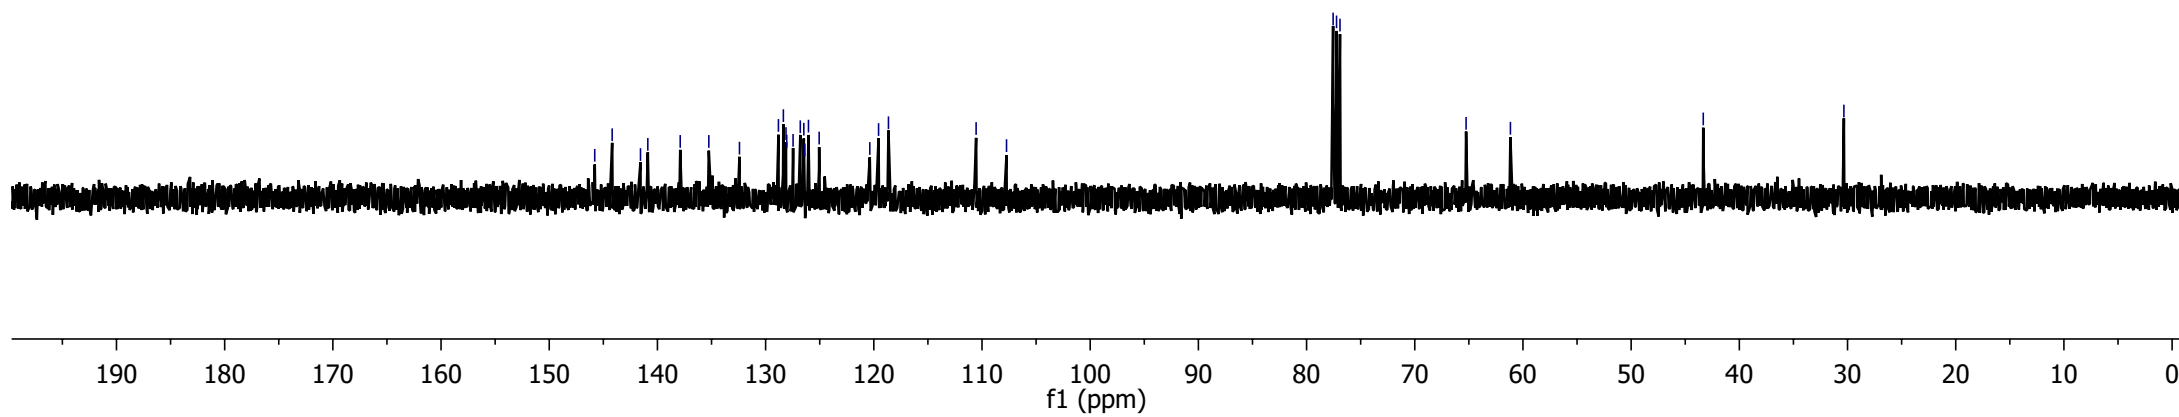

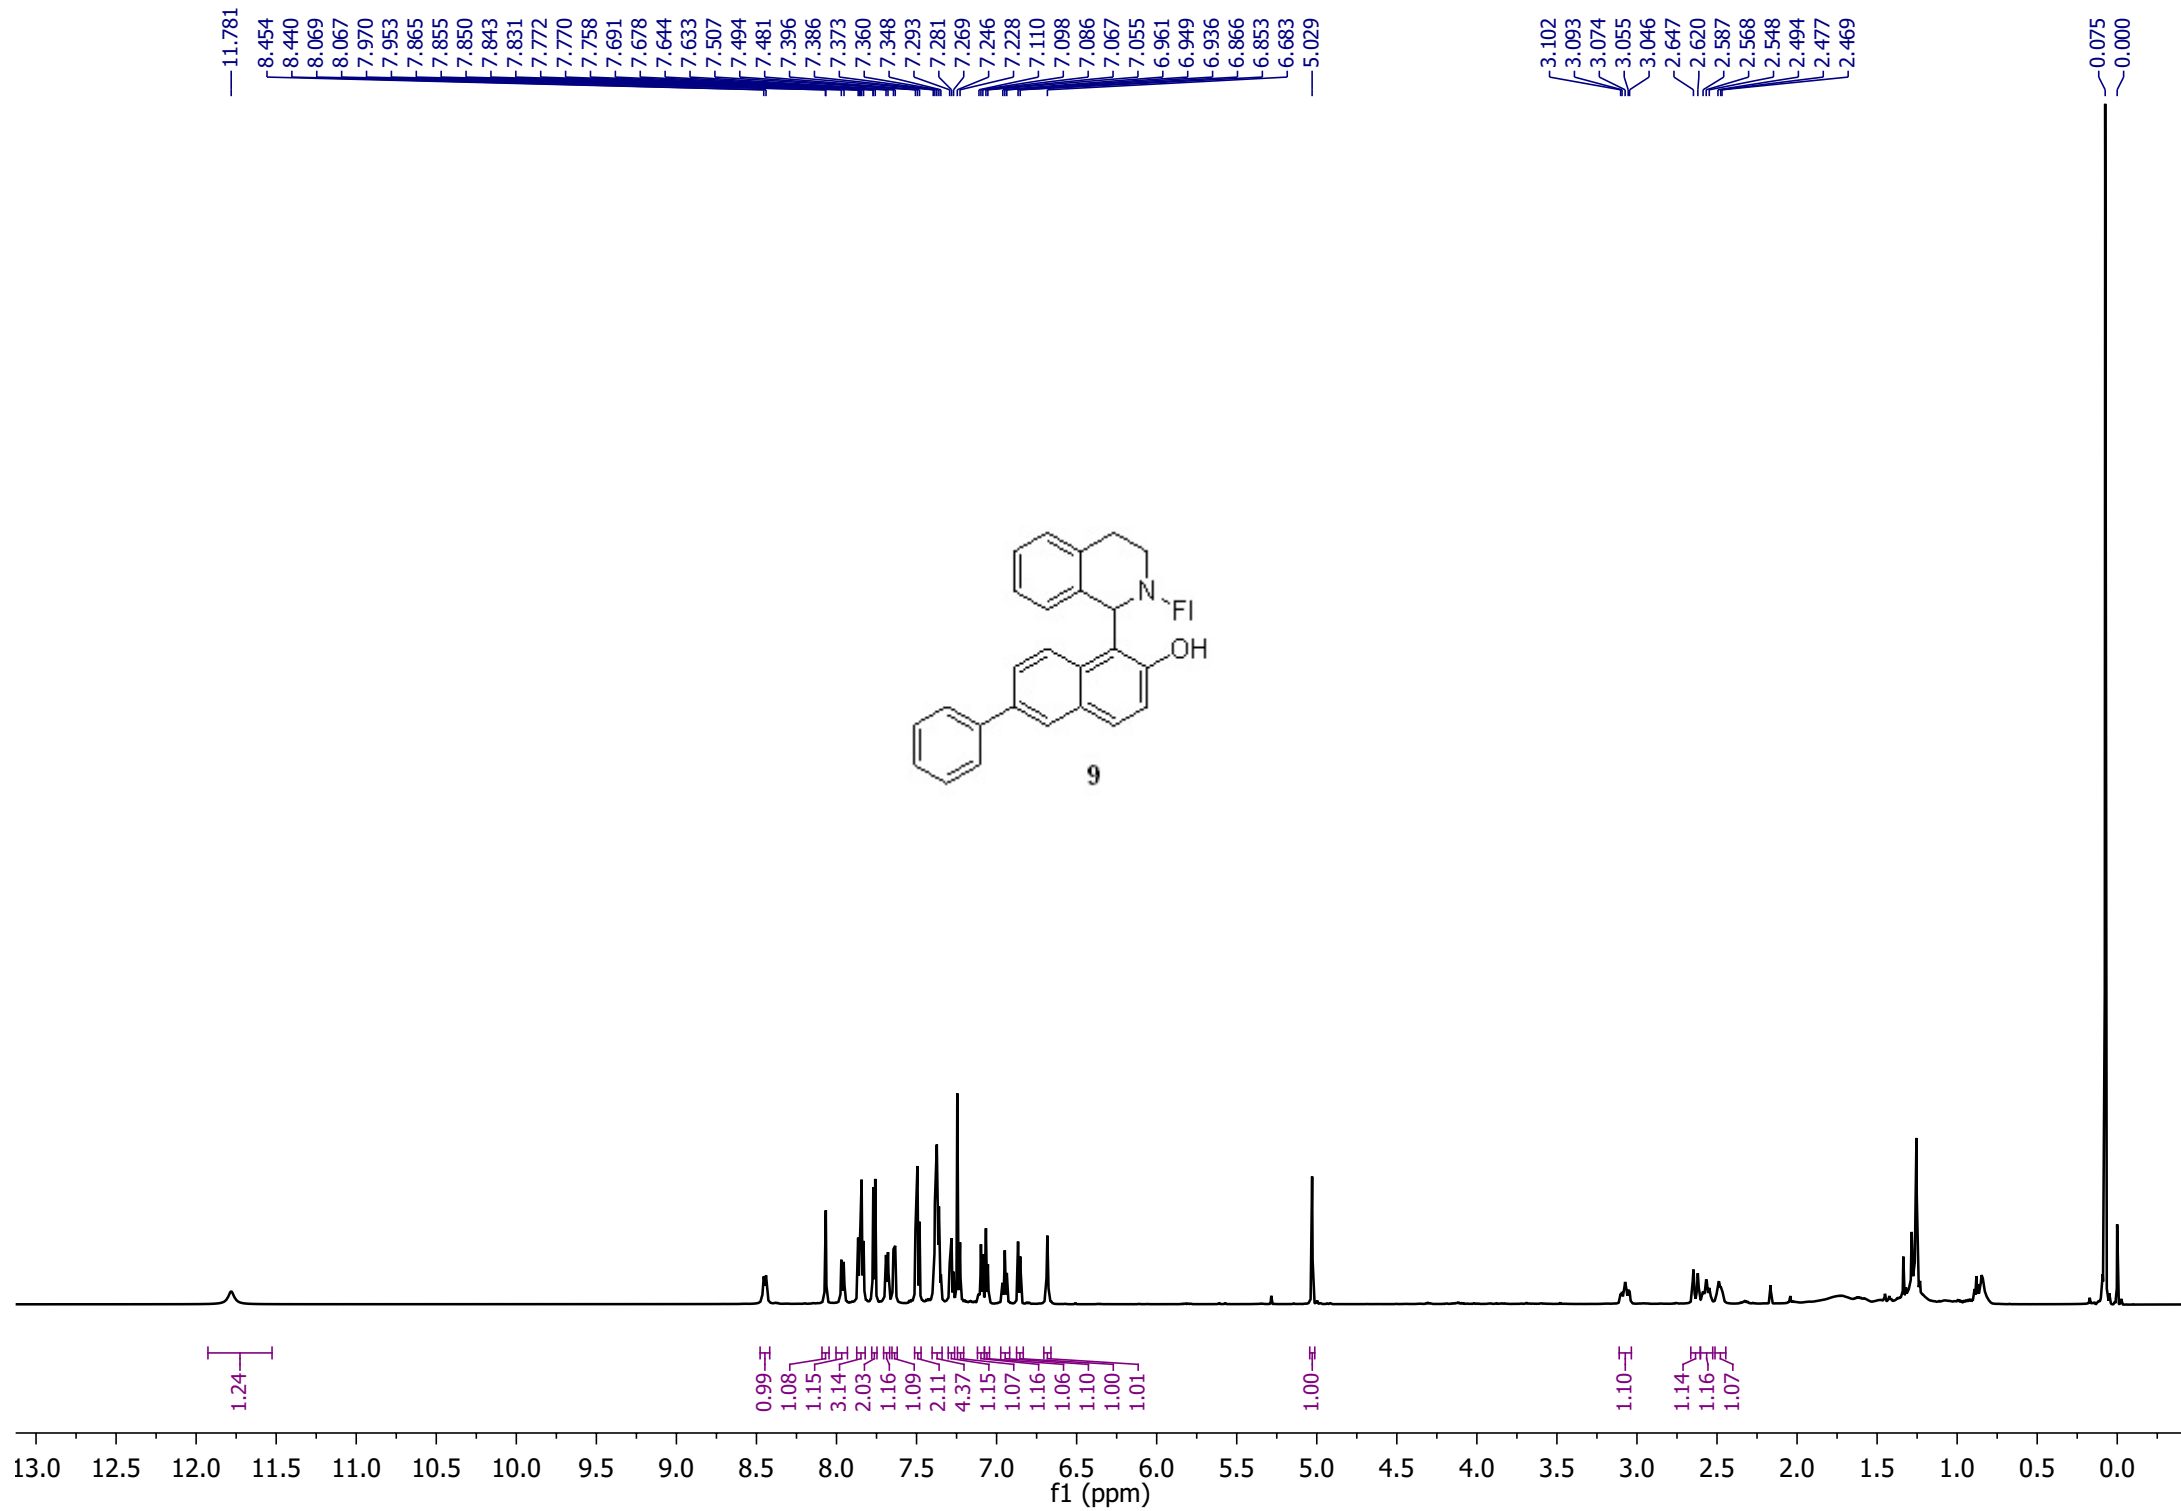

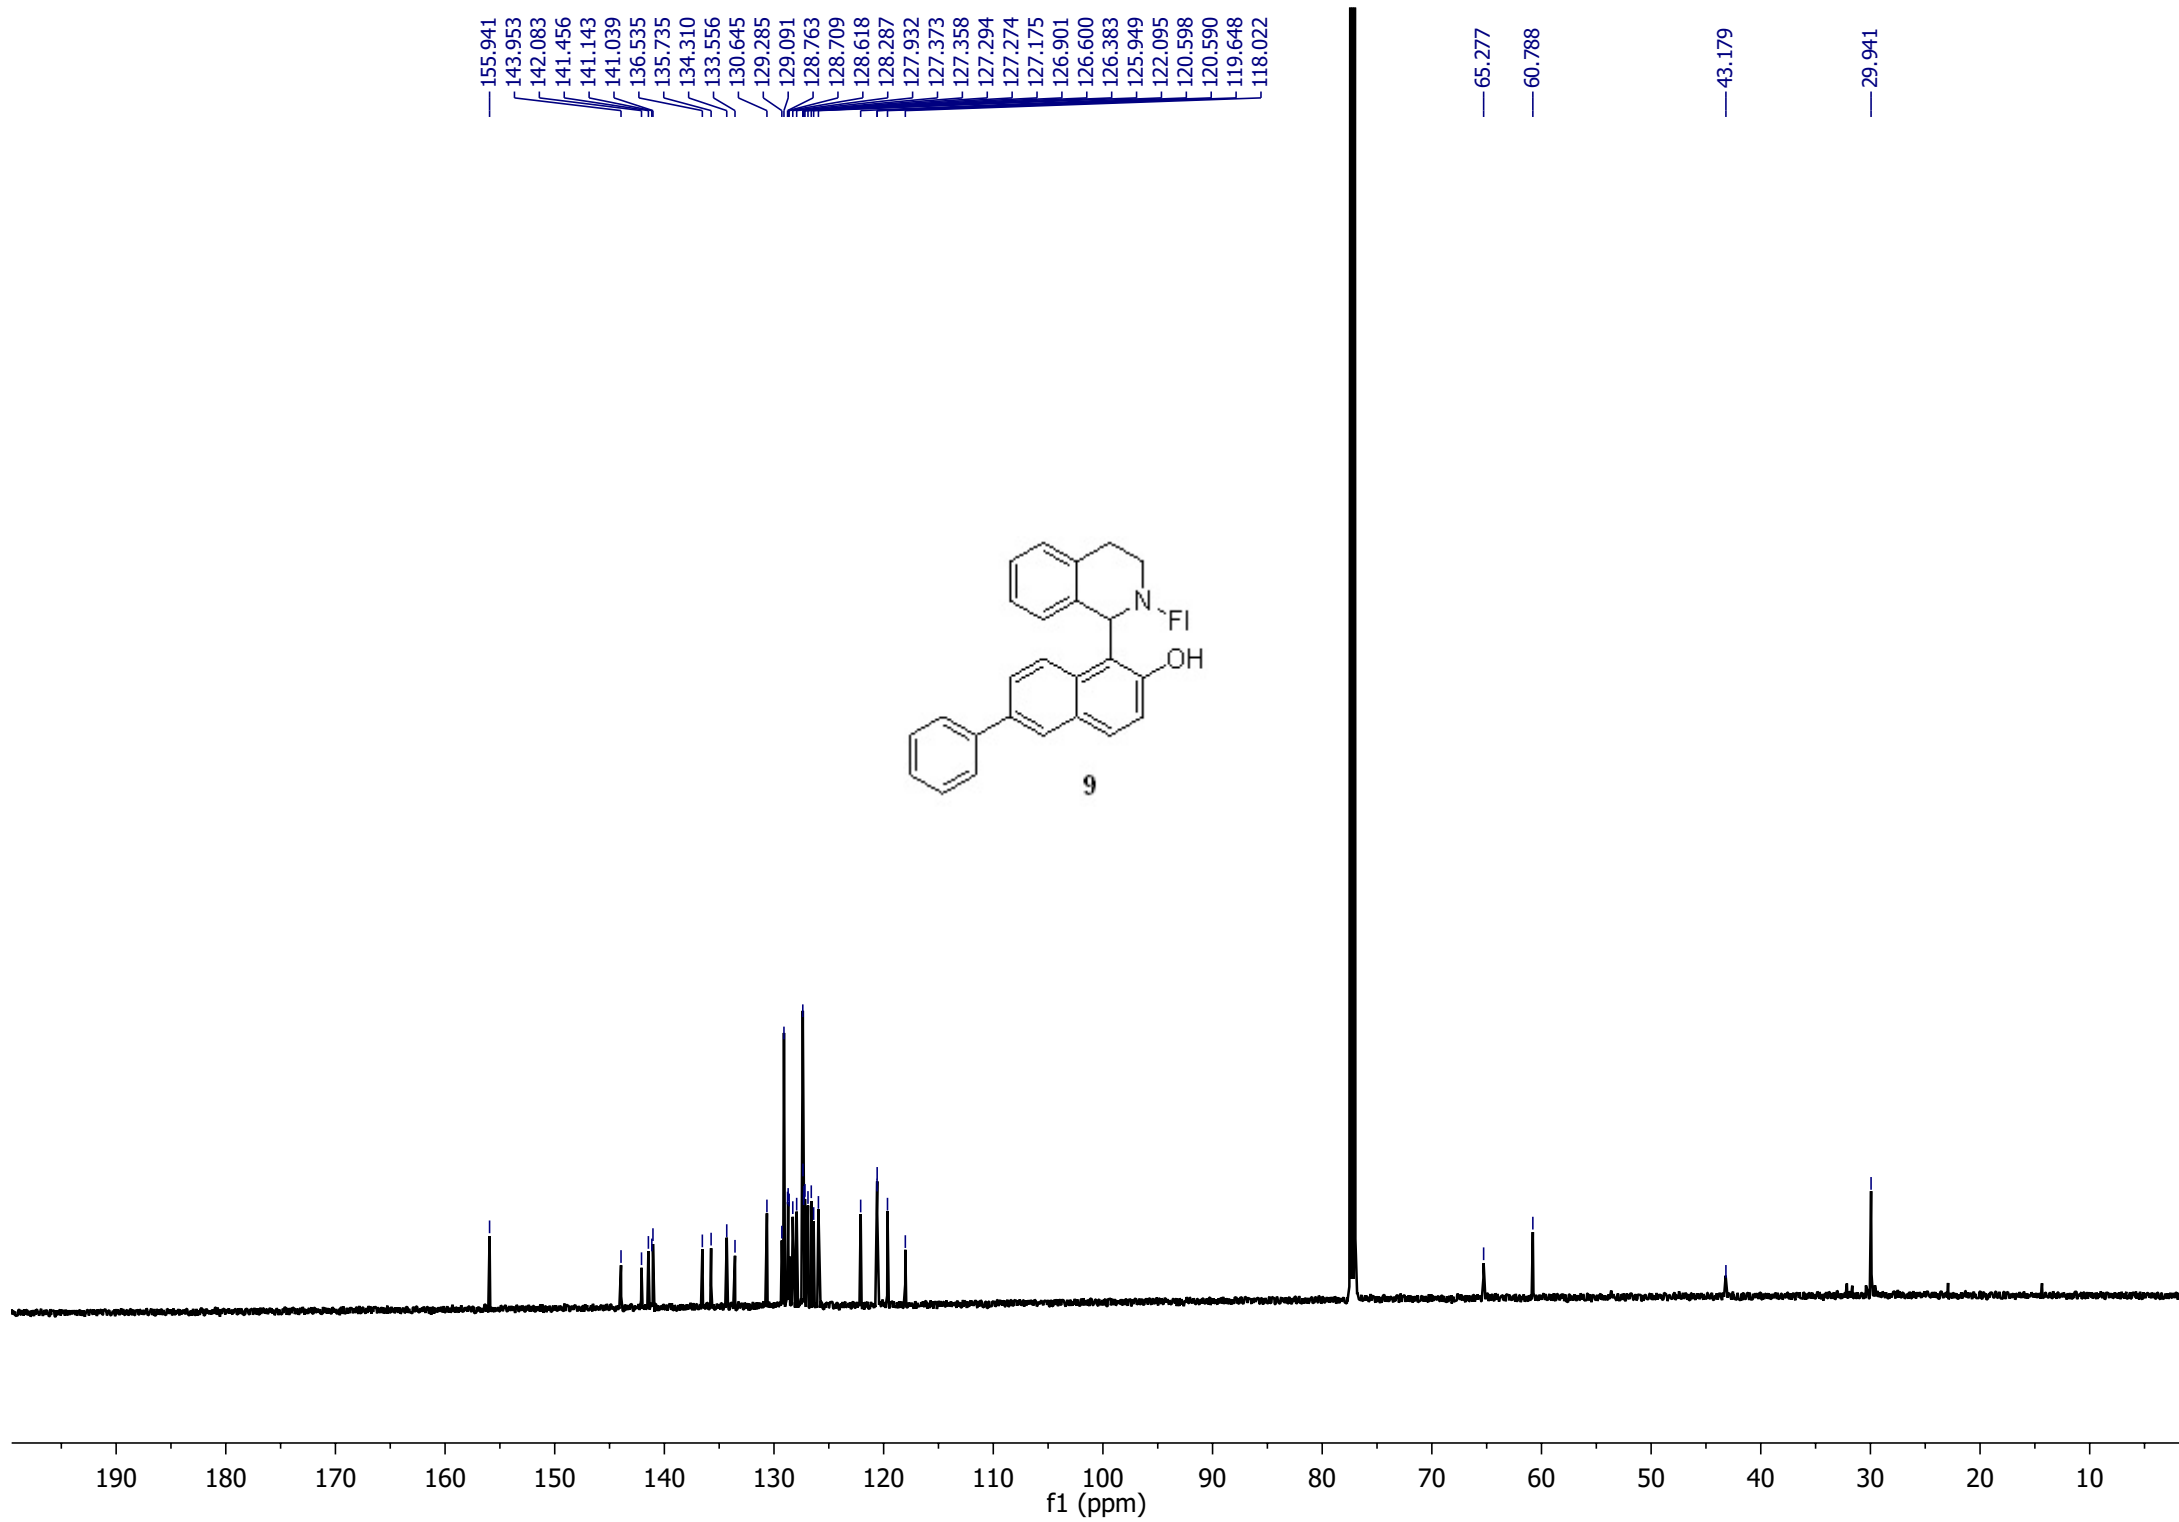

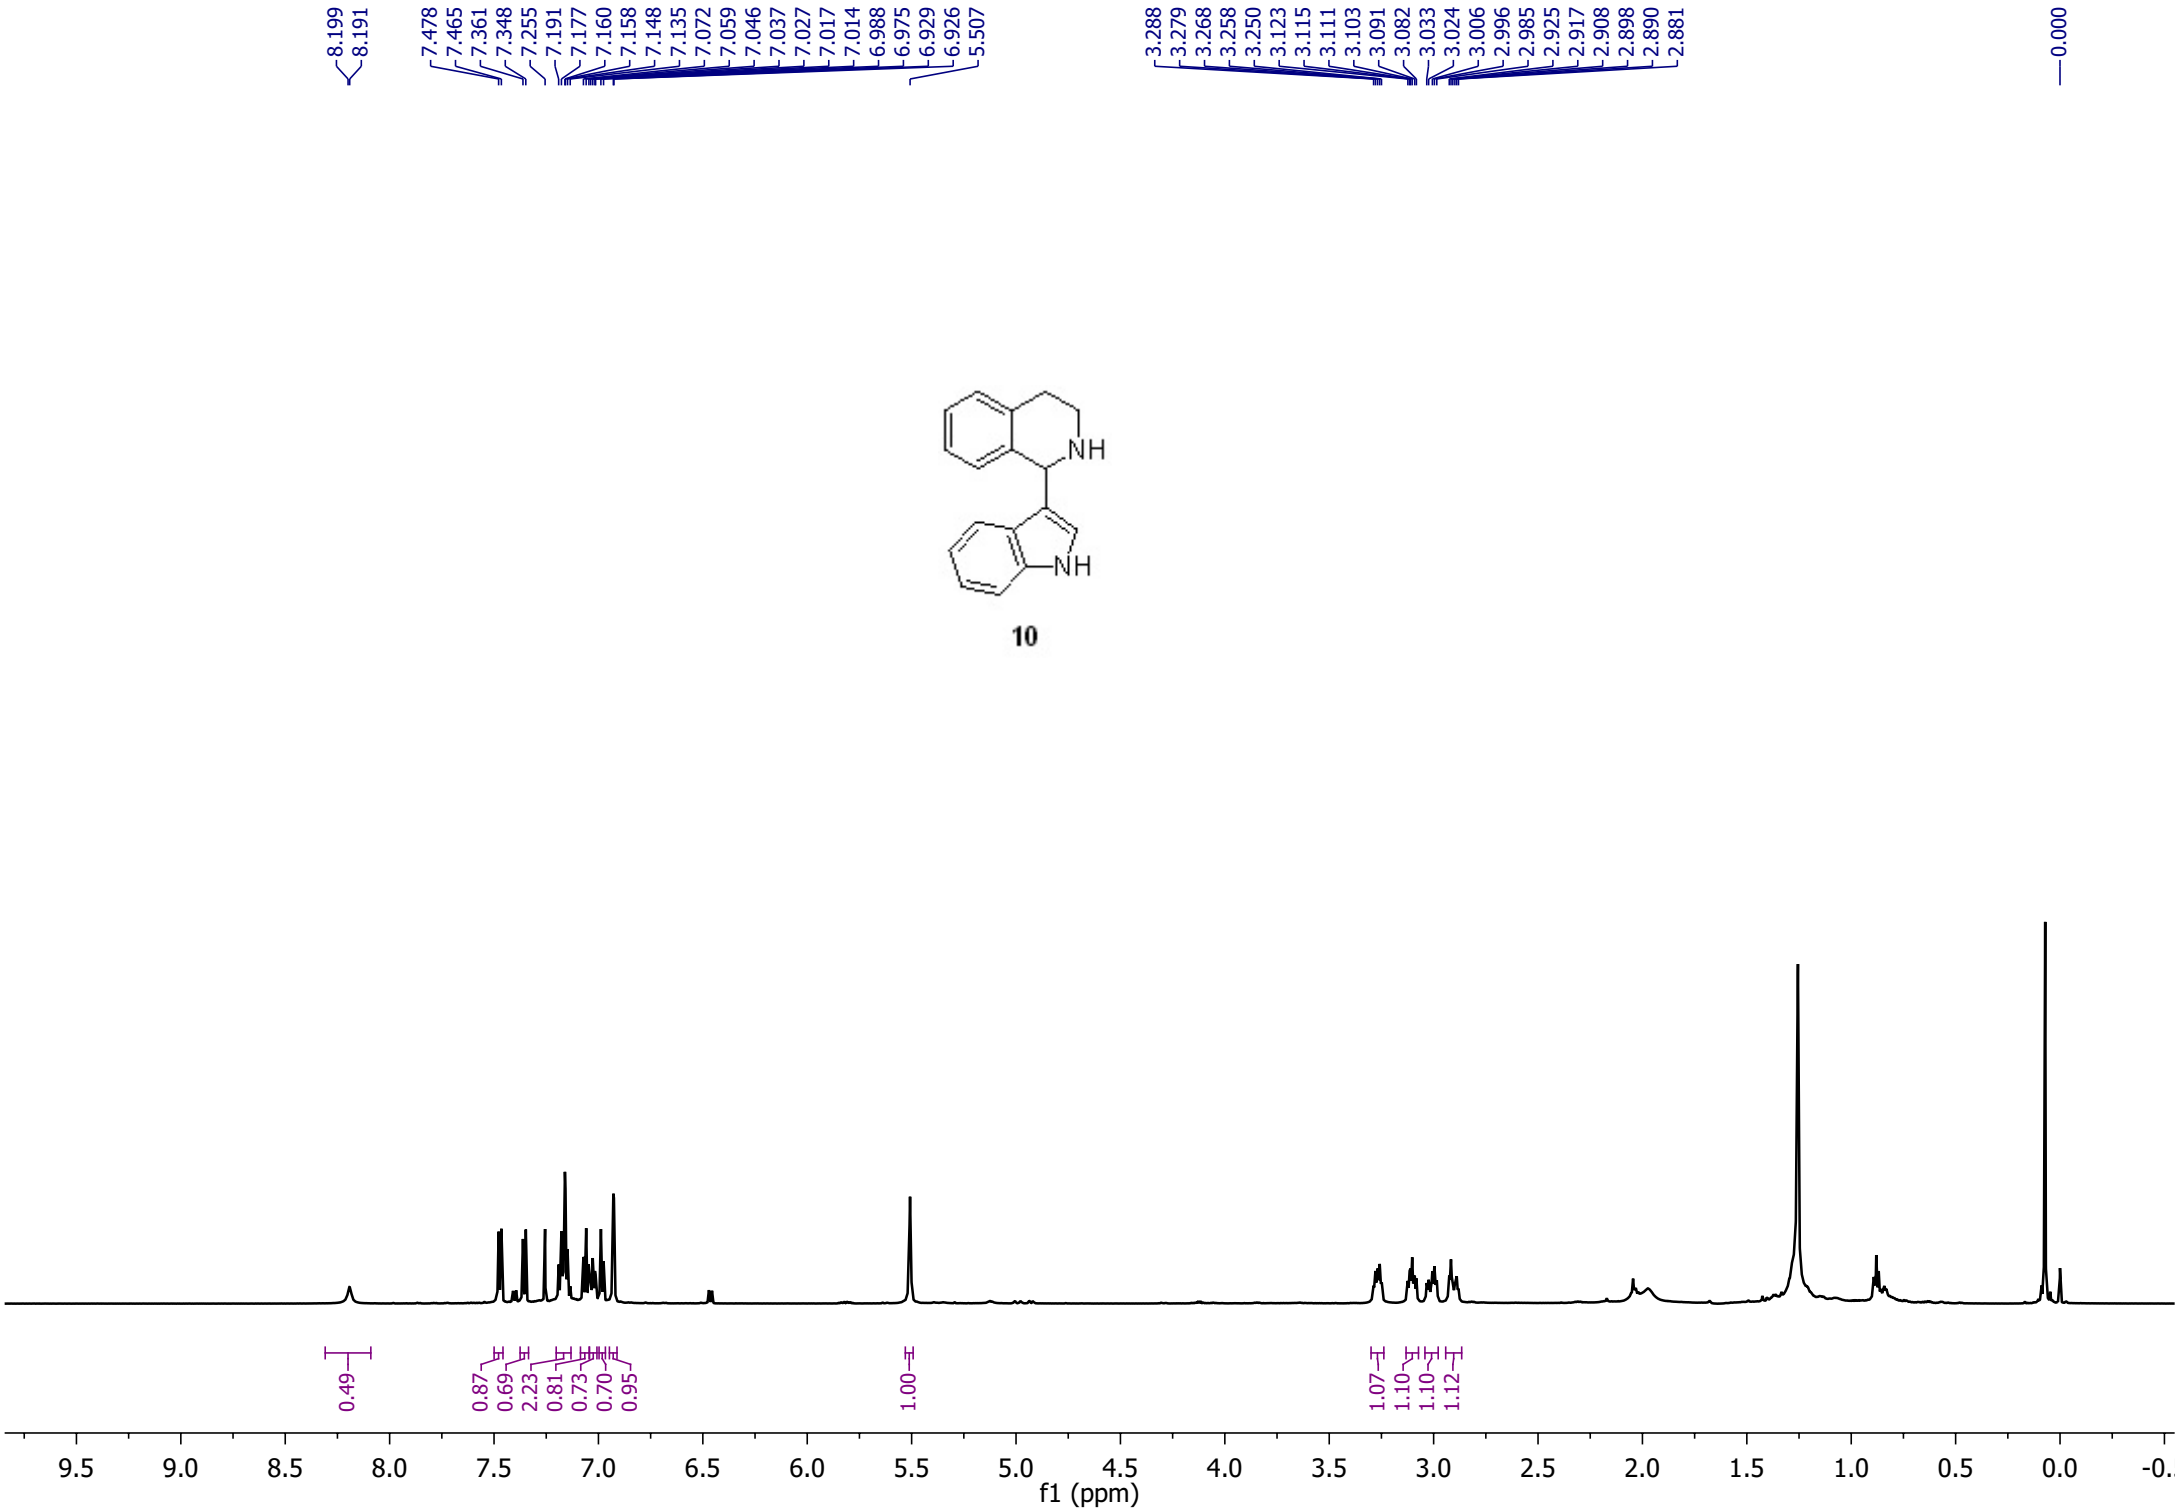

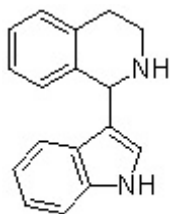

10

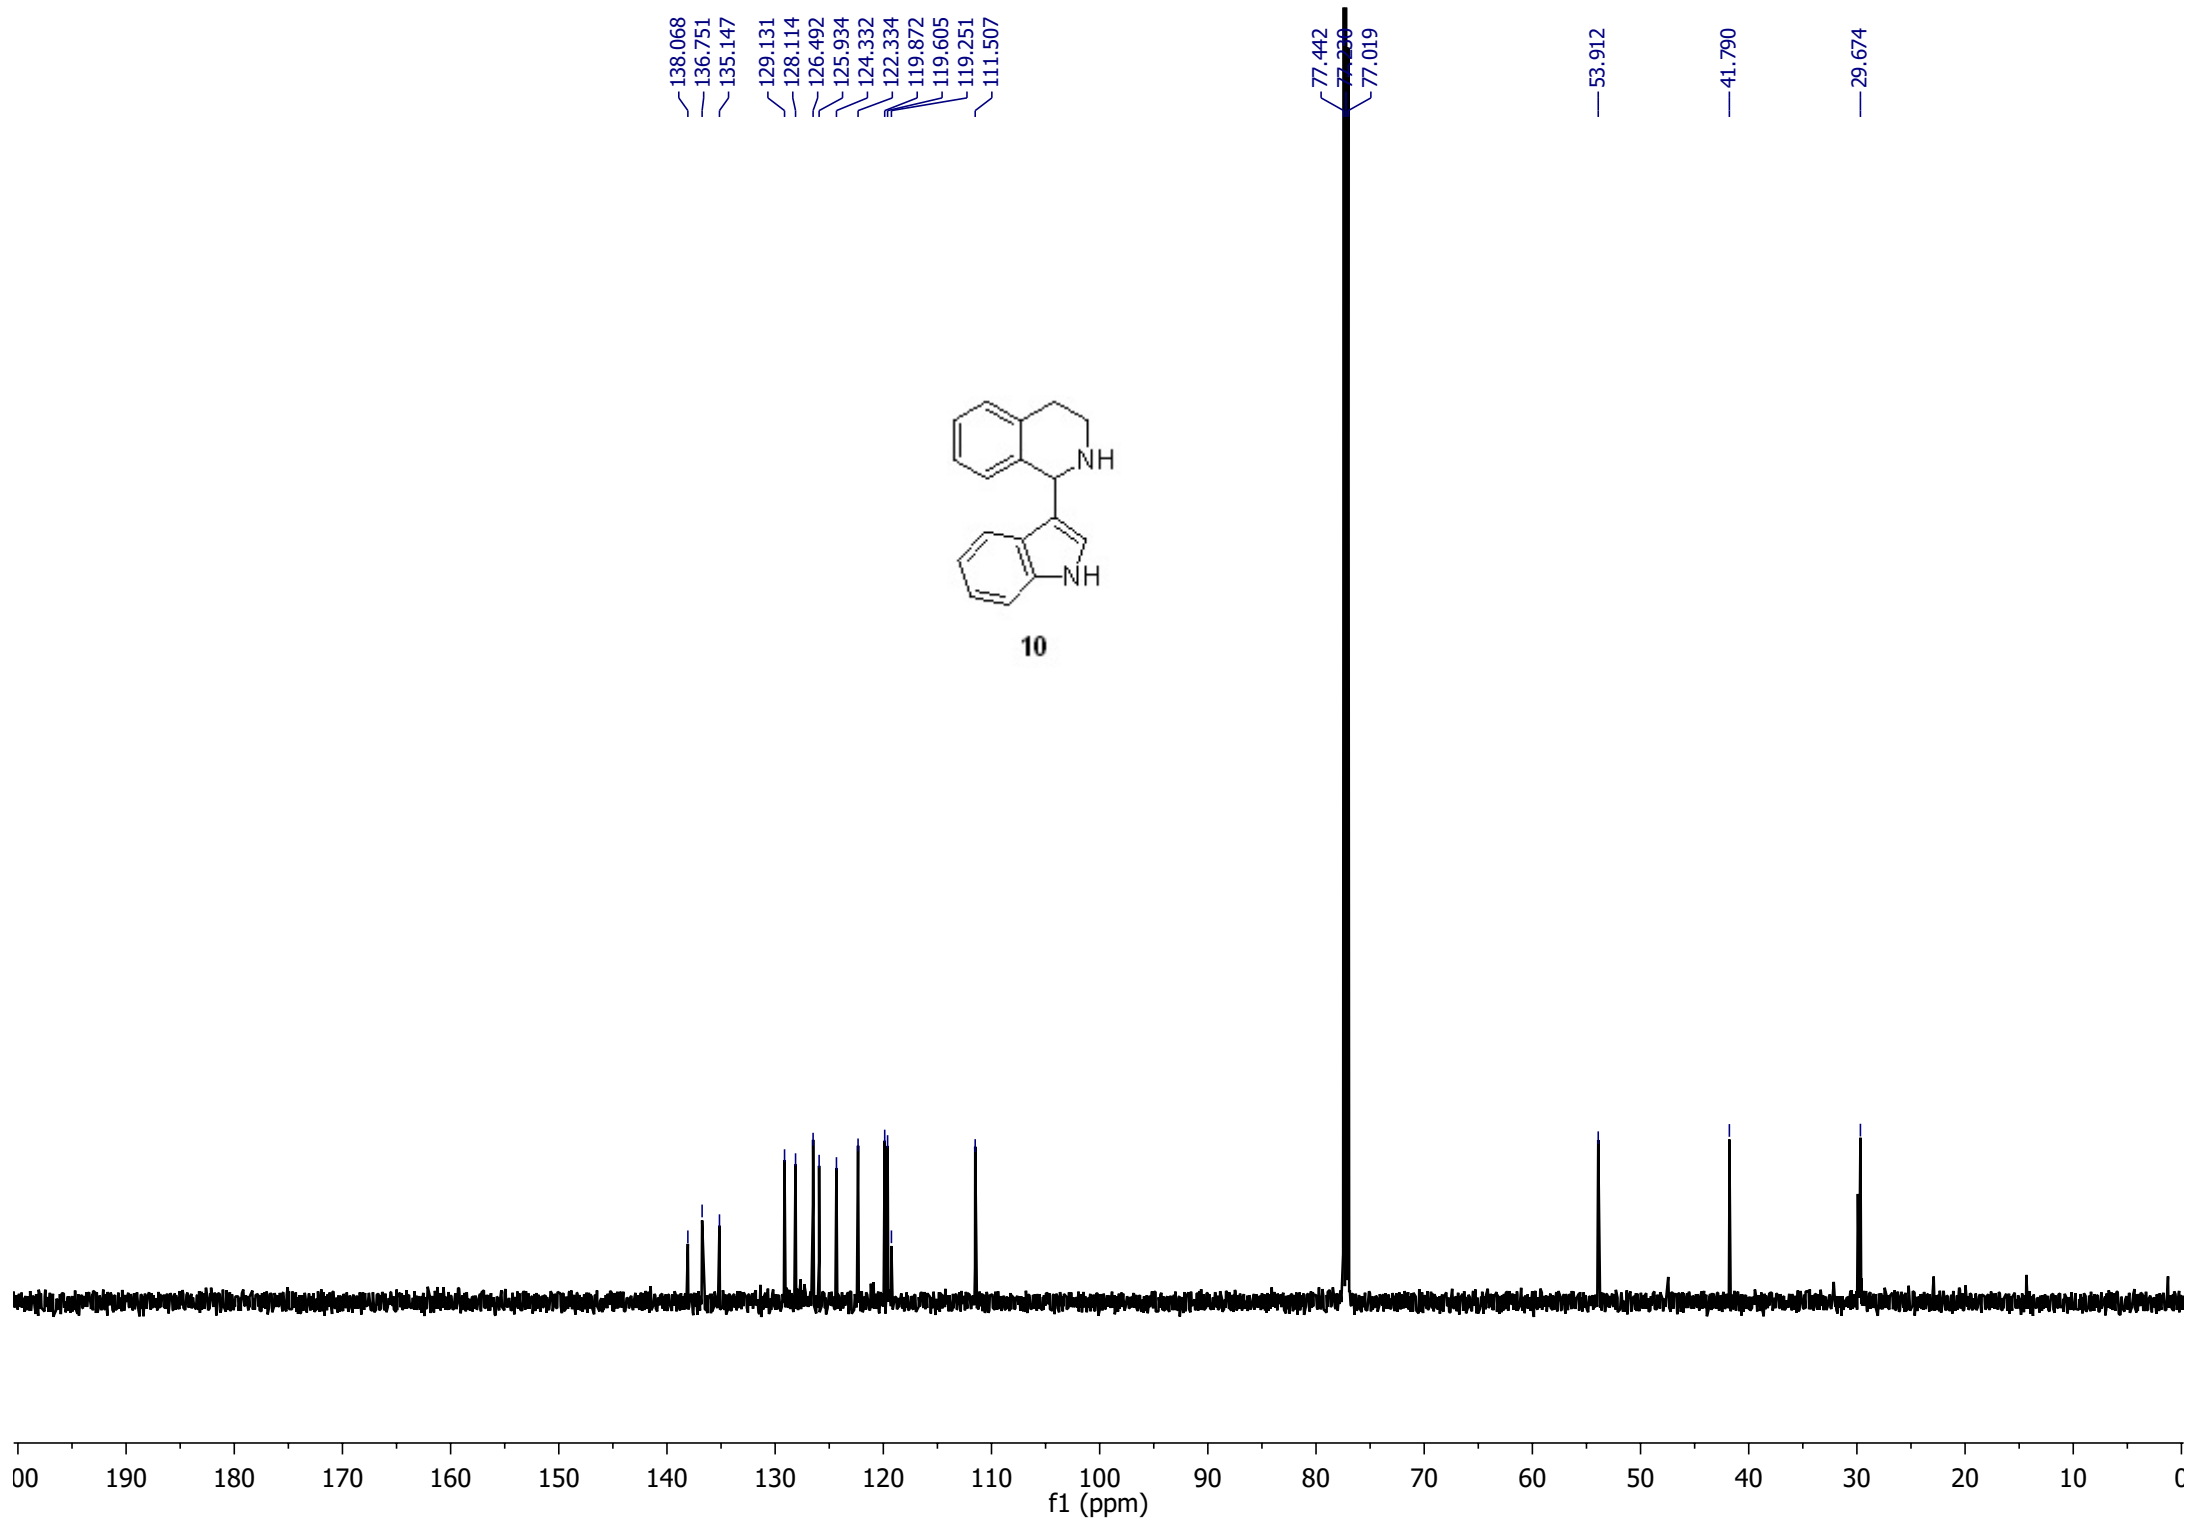

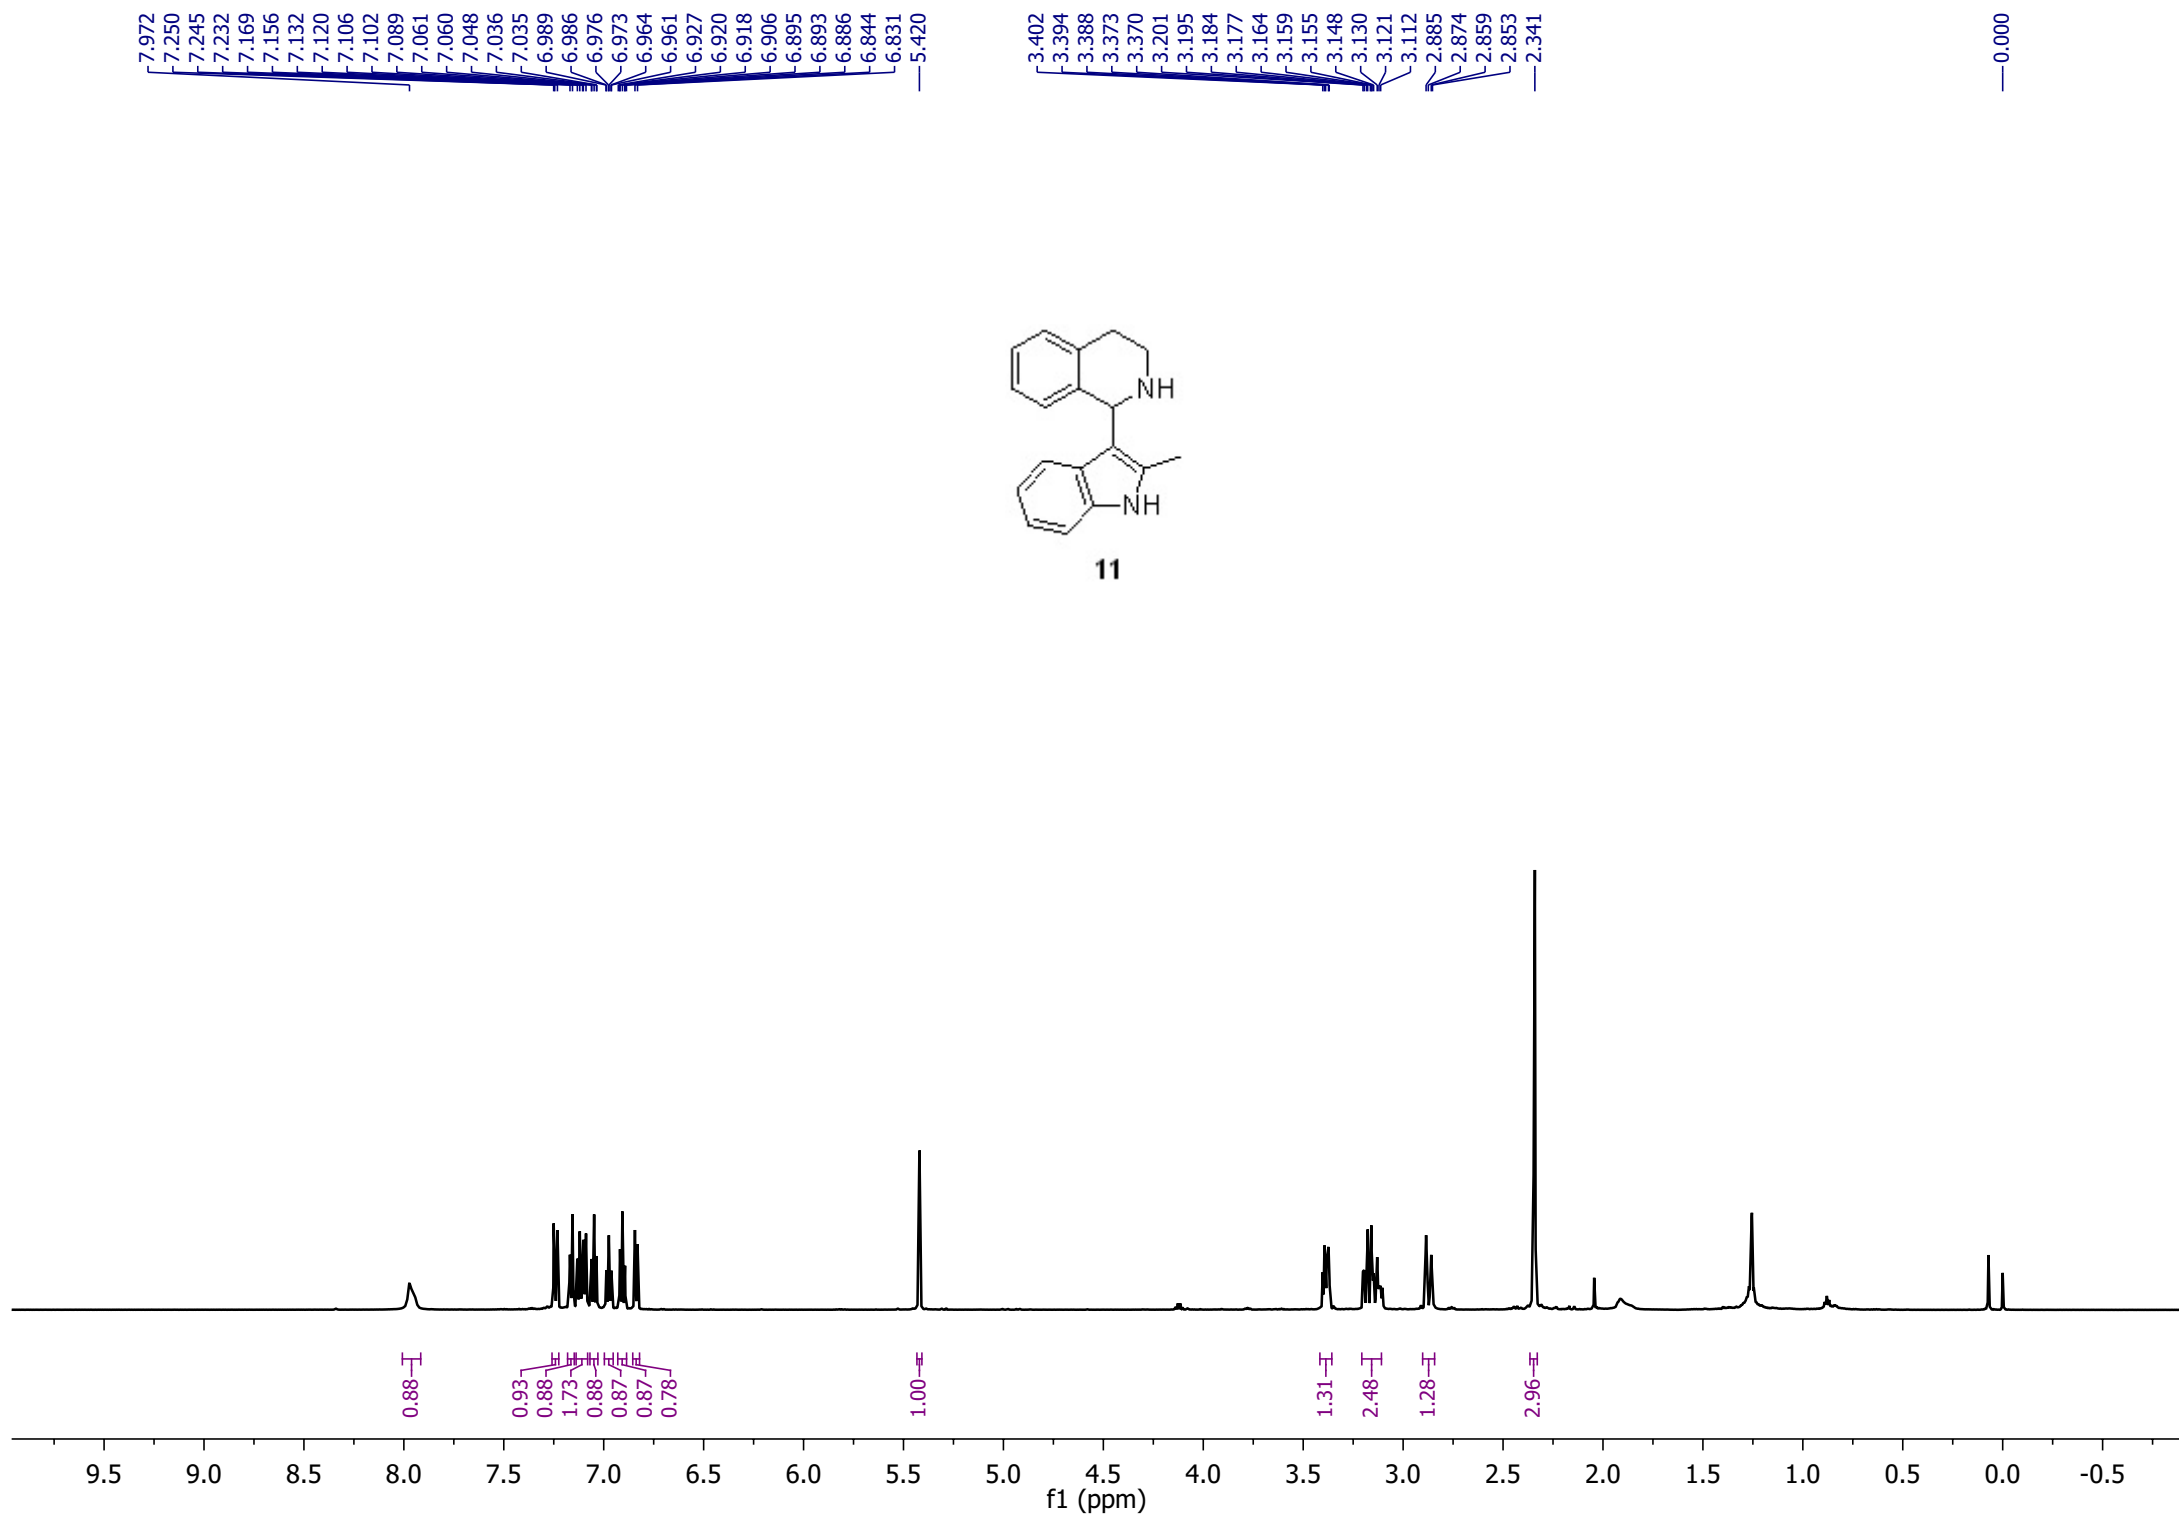

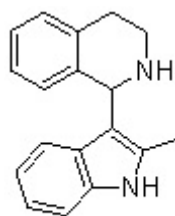

**11**

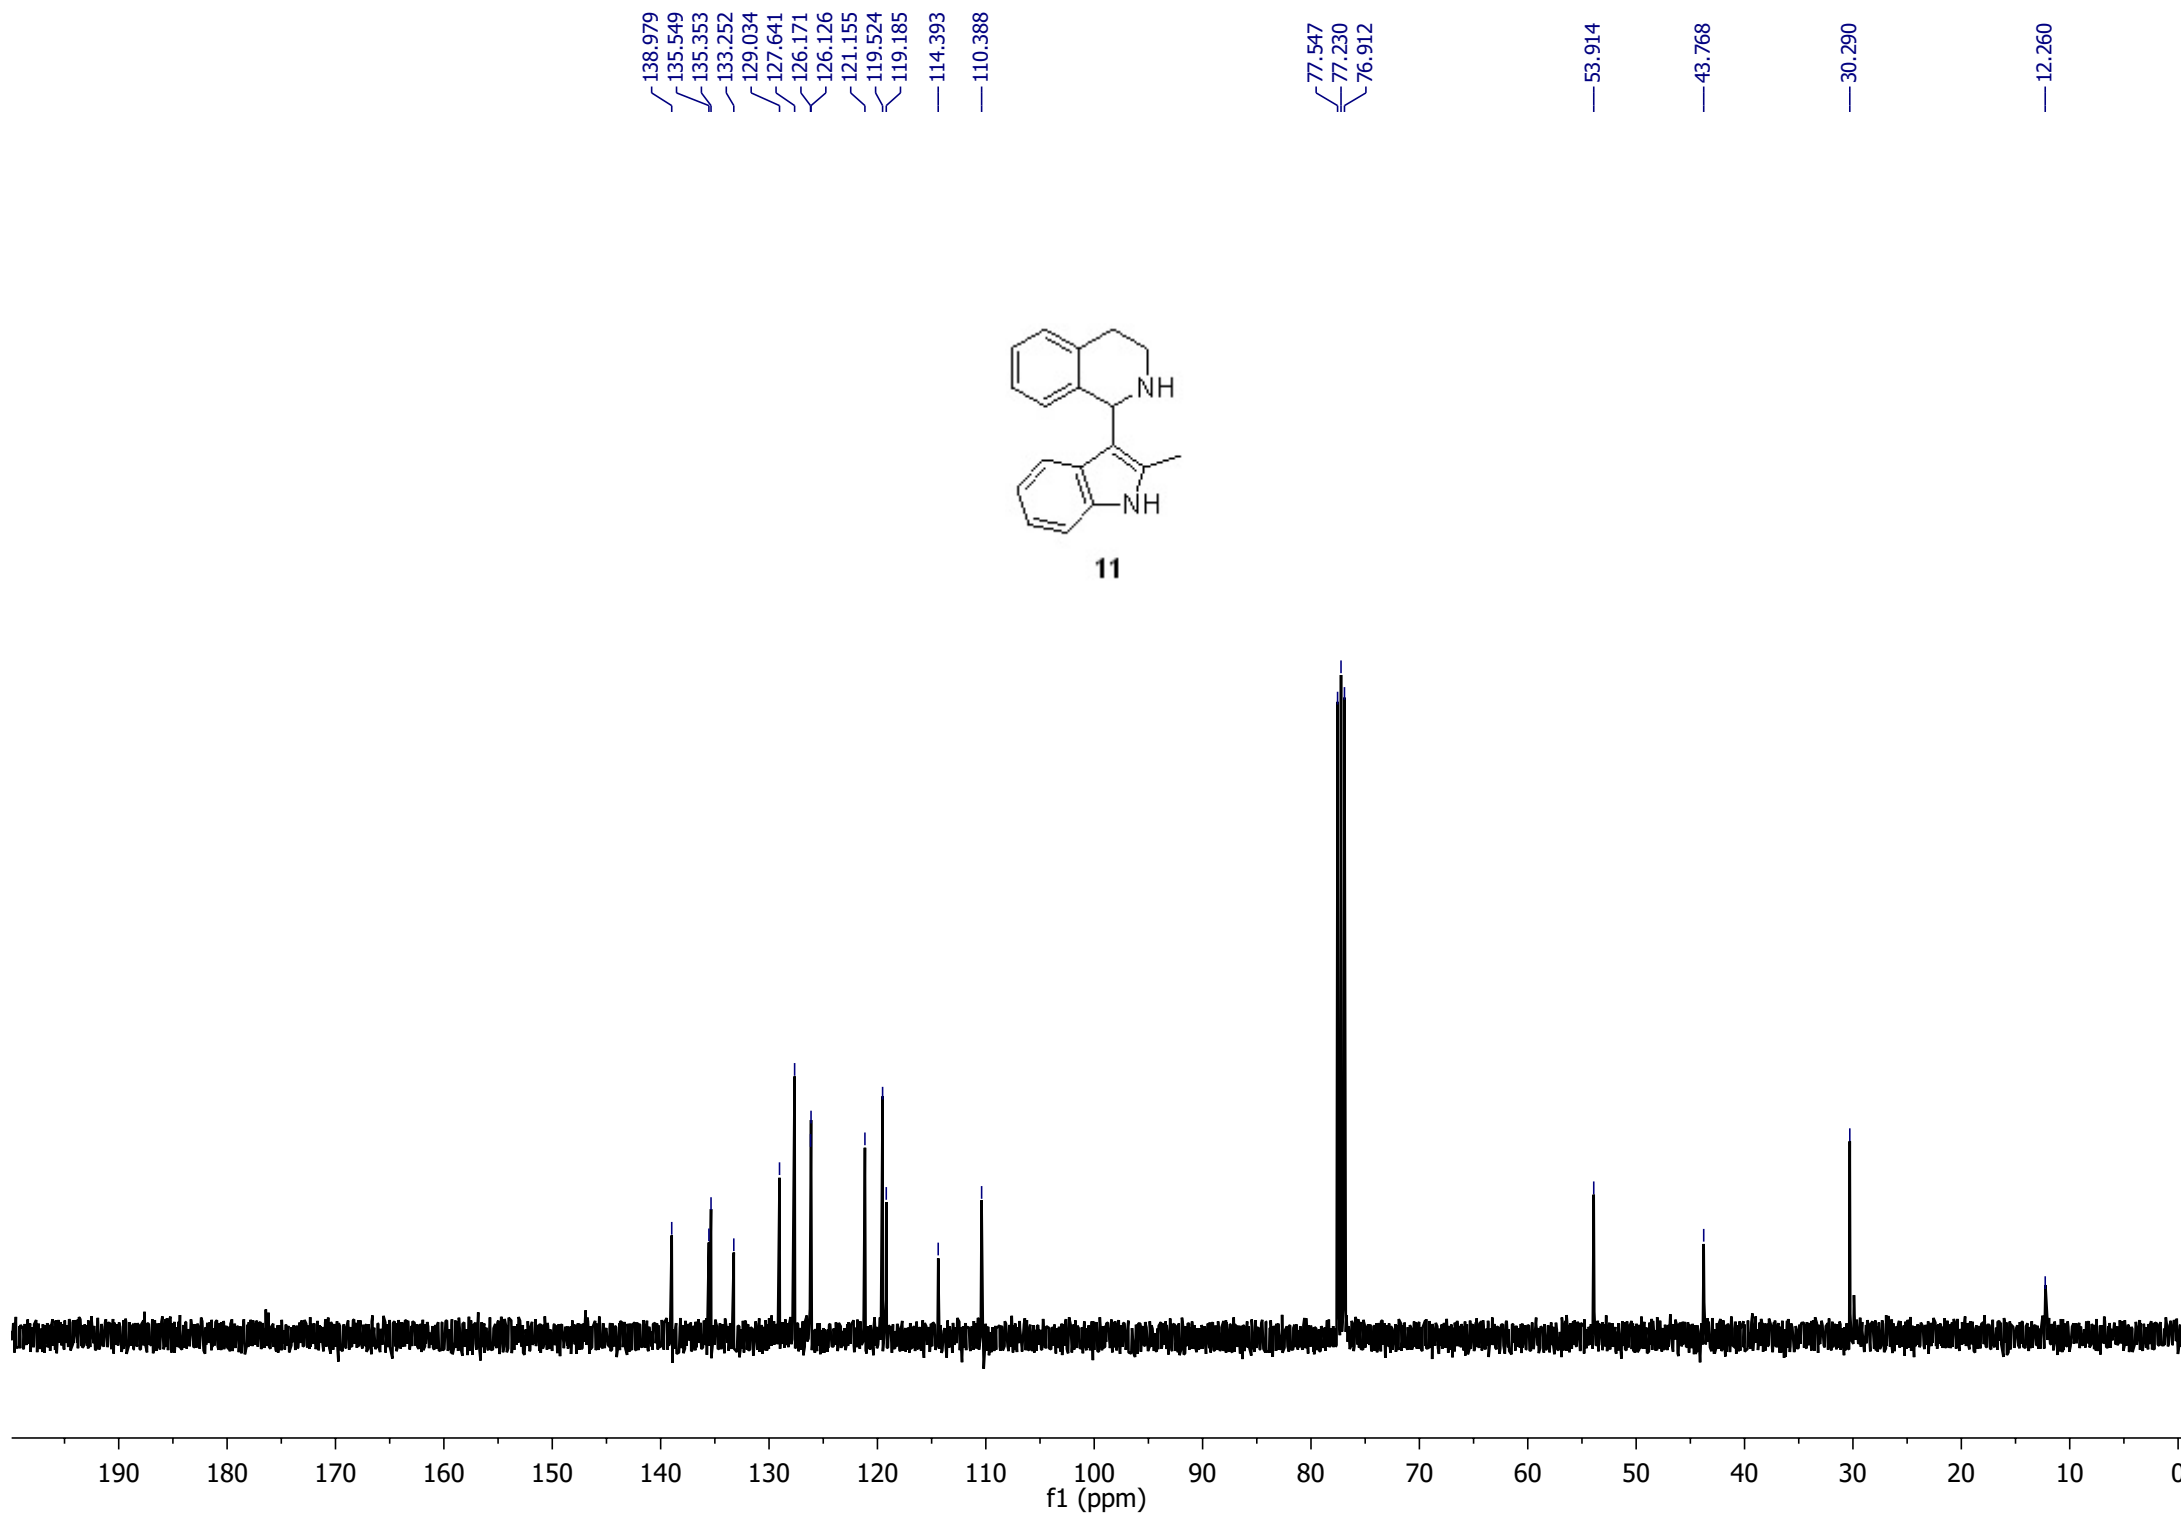

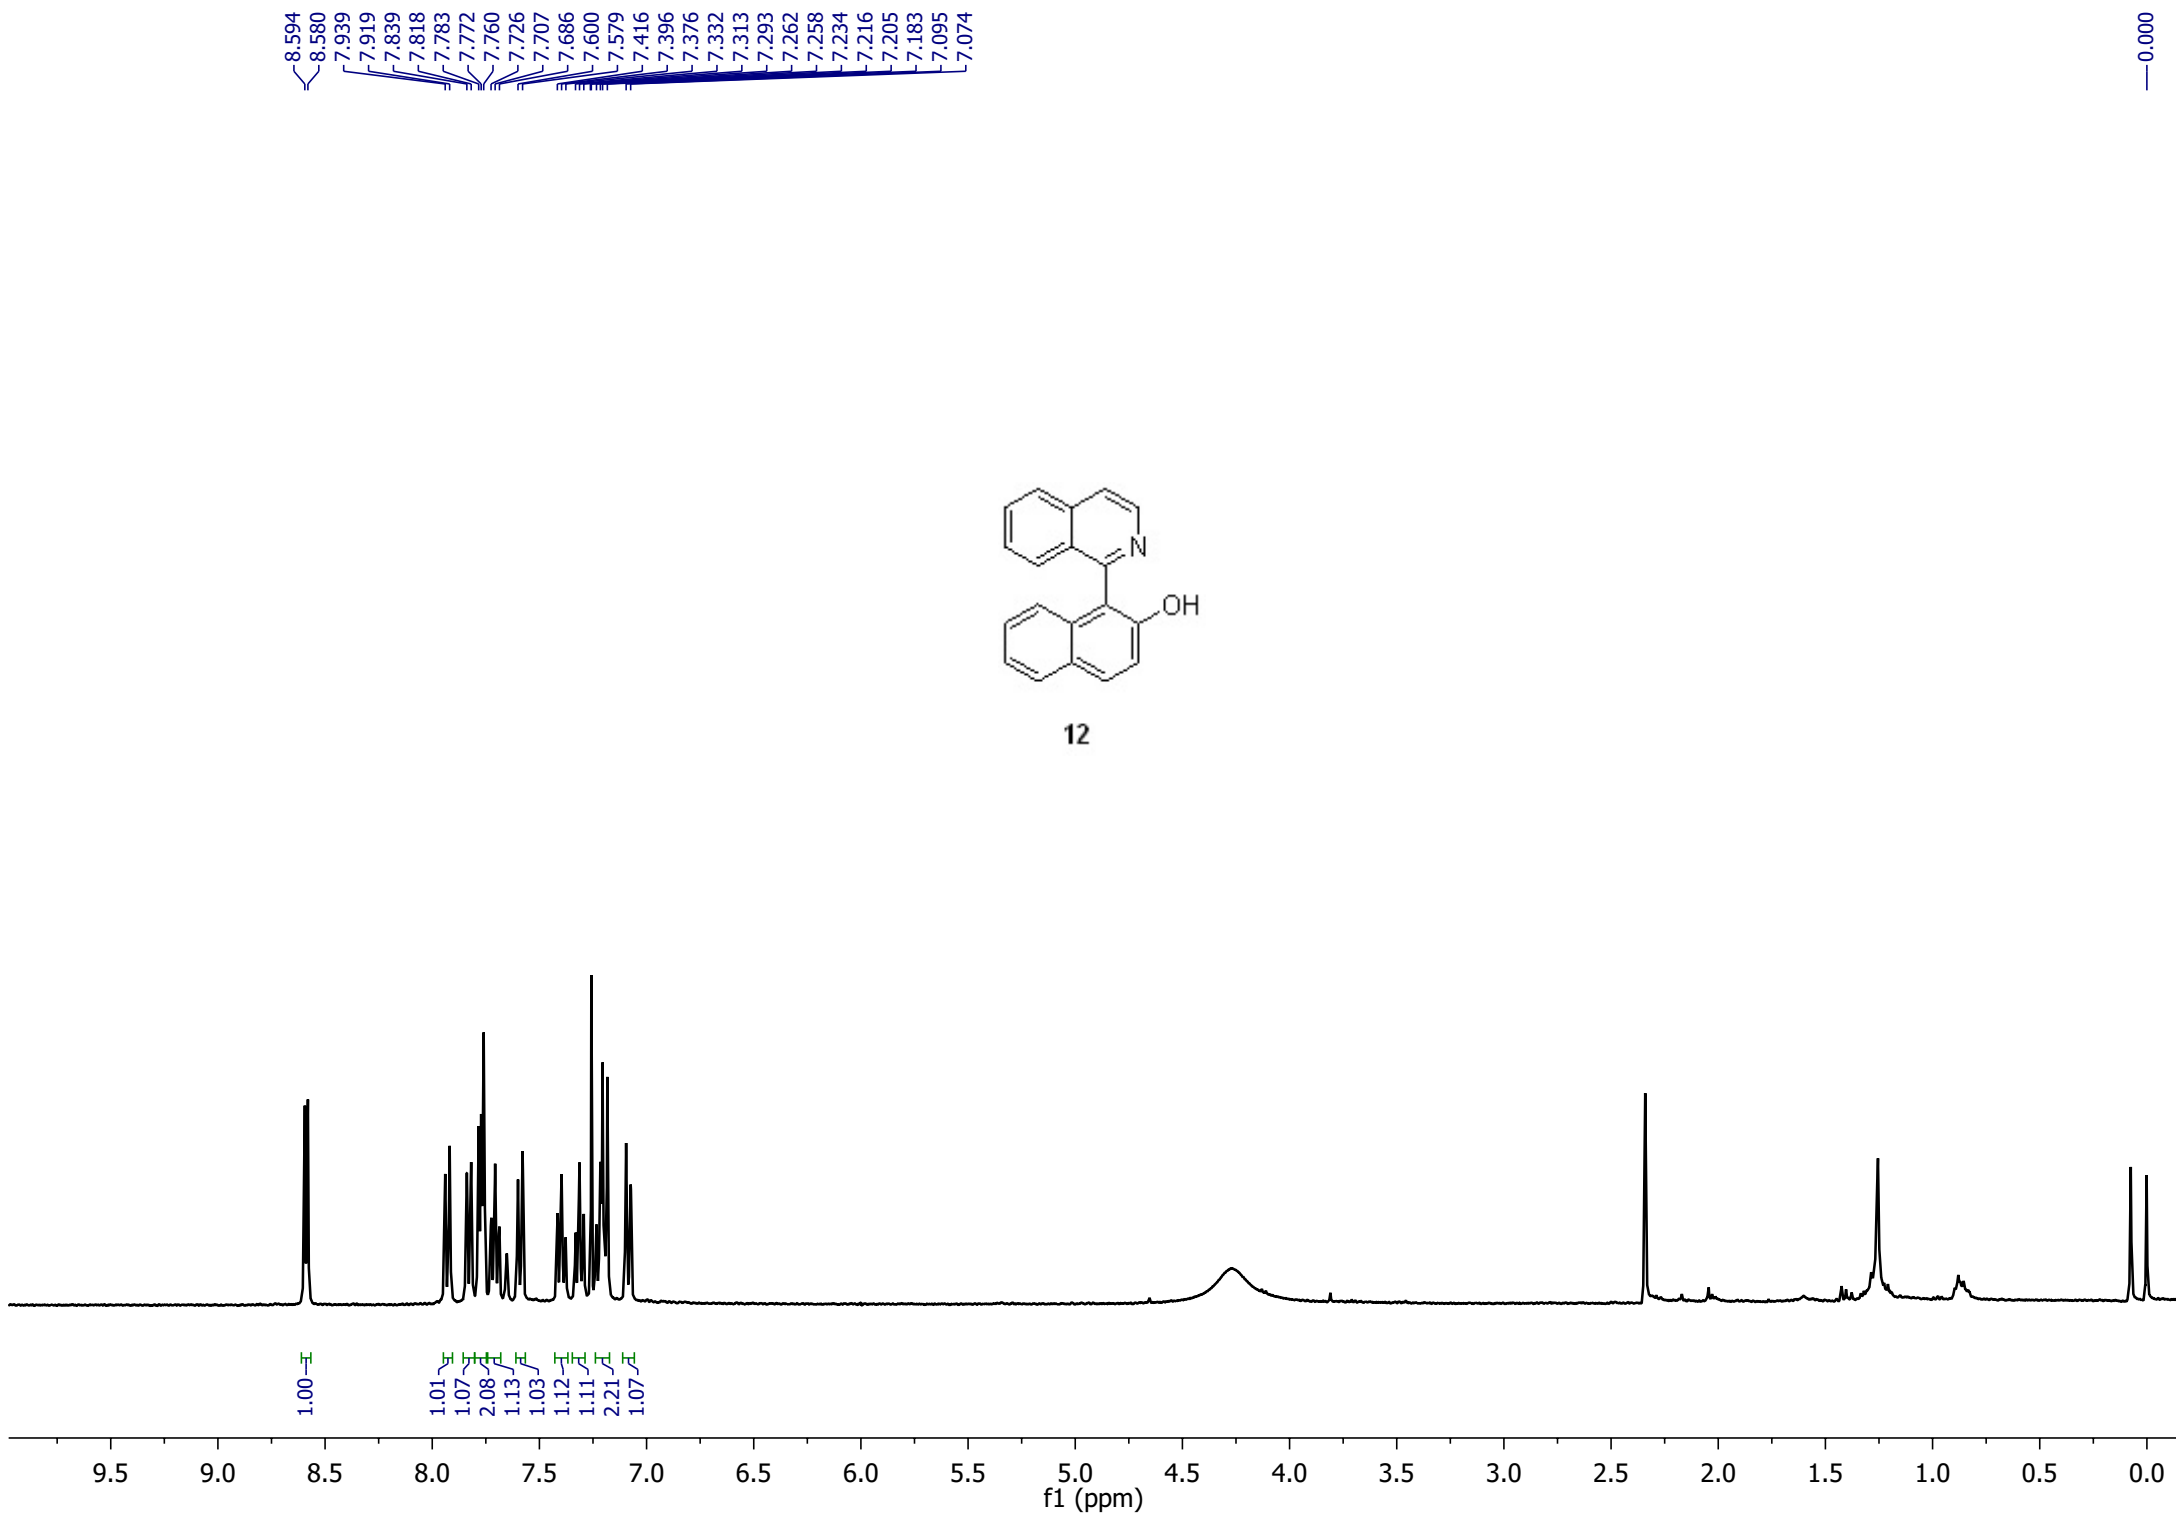

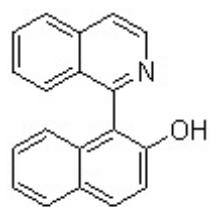

12

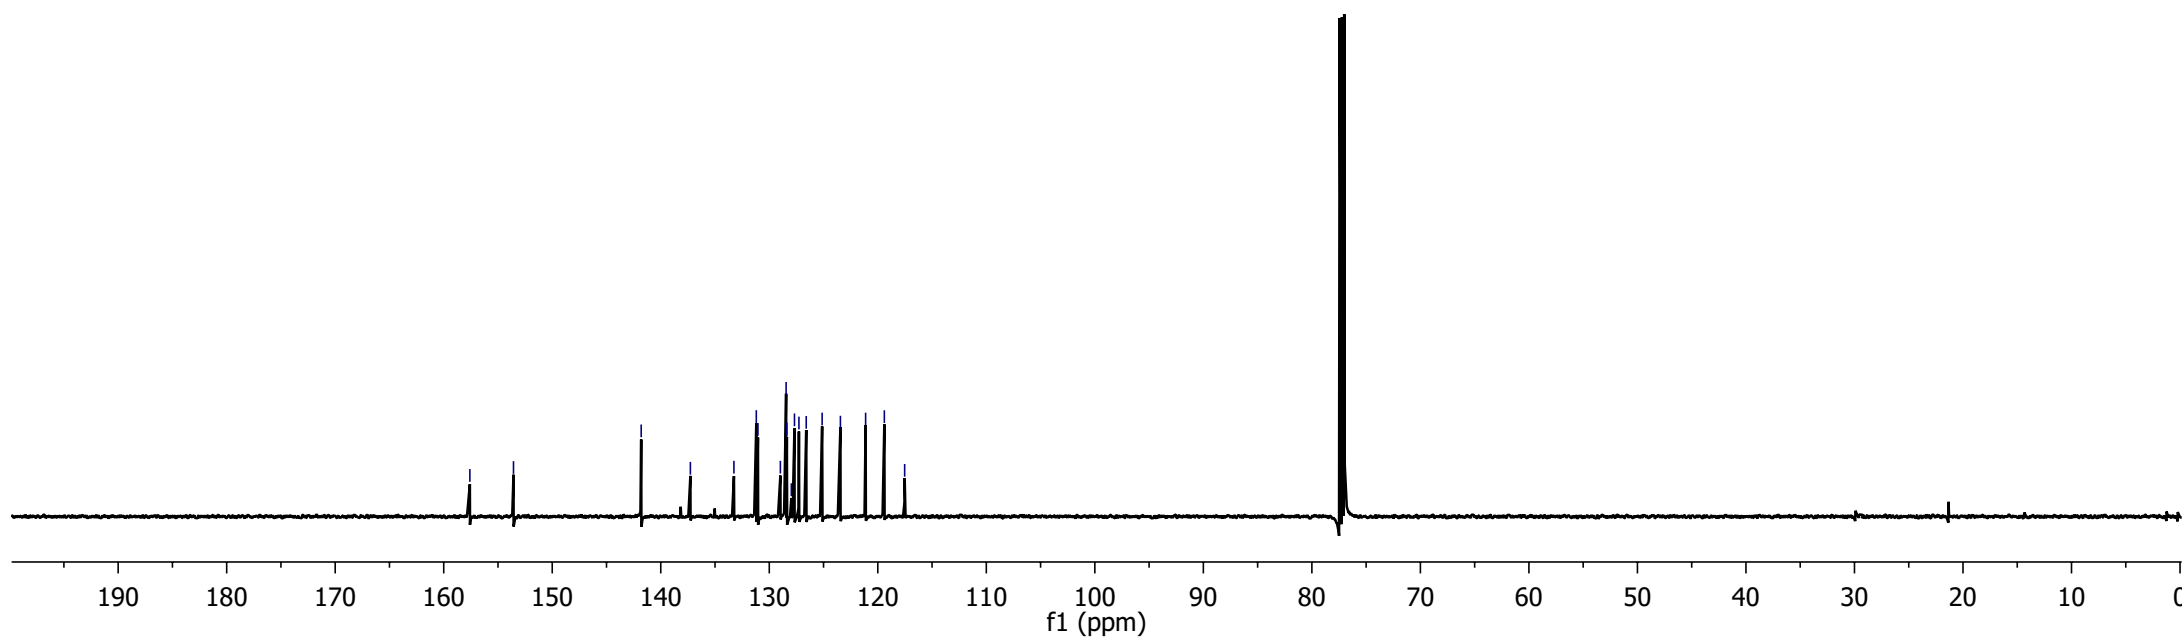

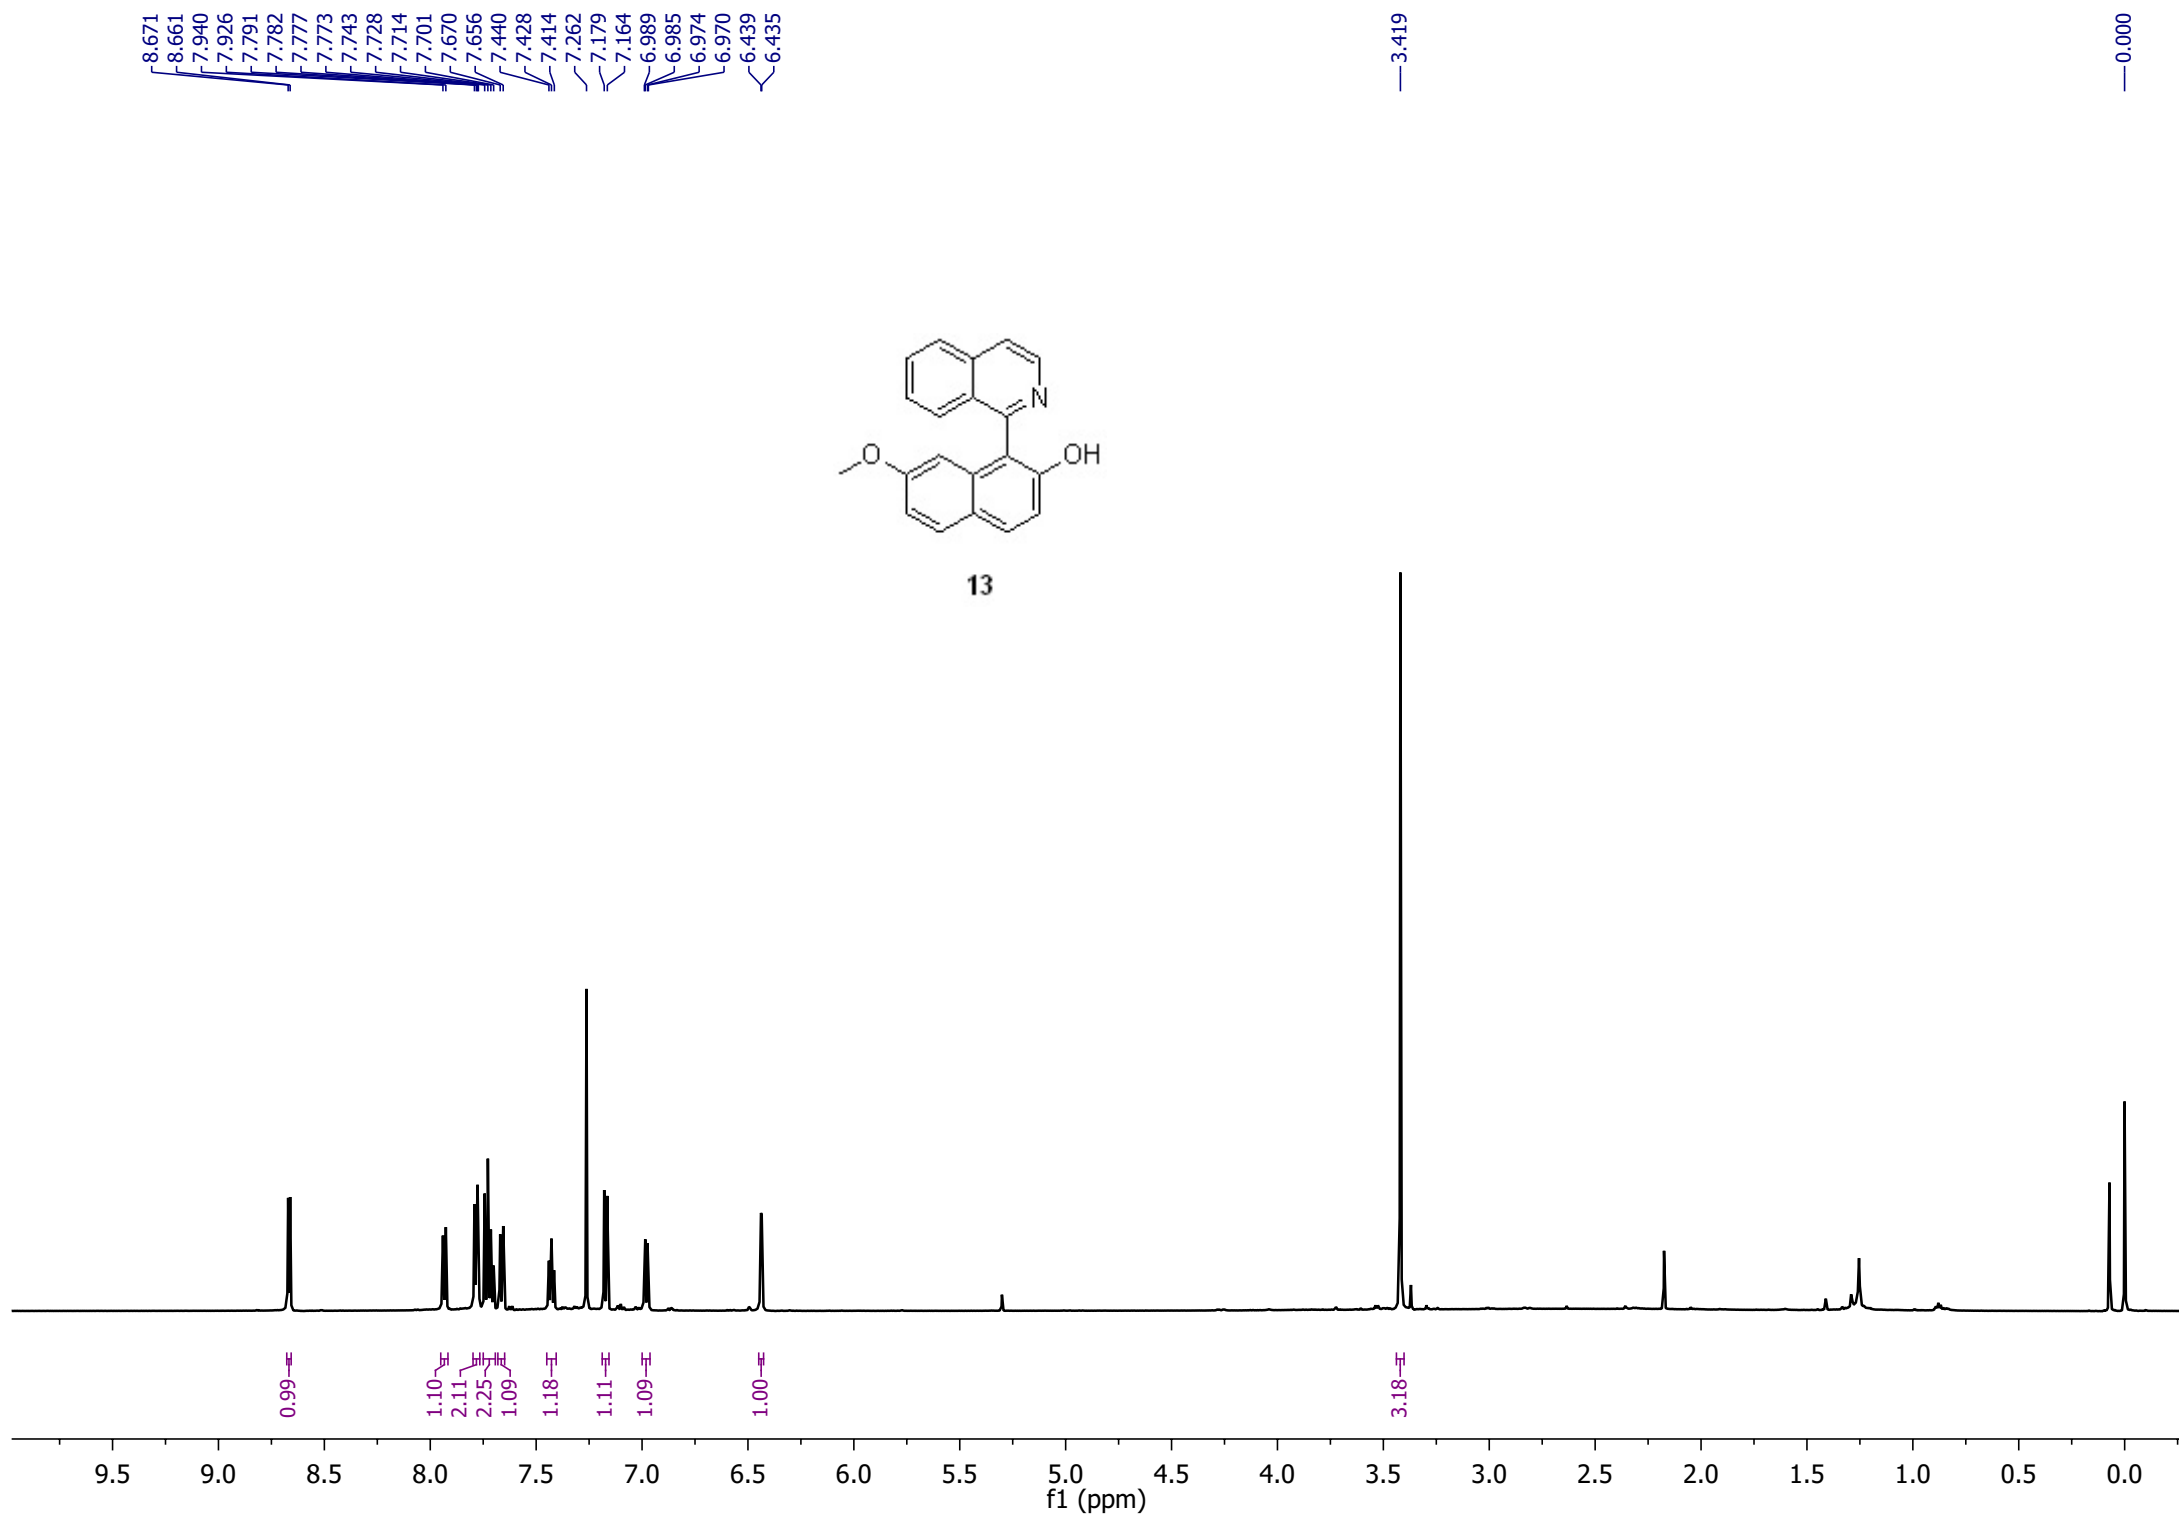

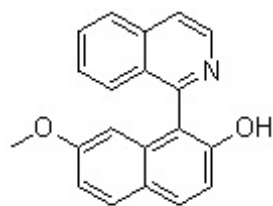

13

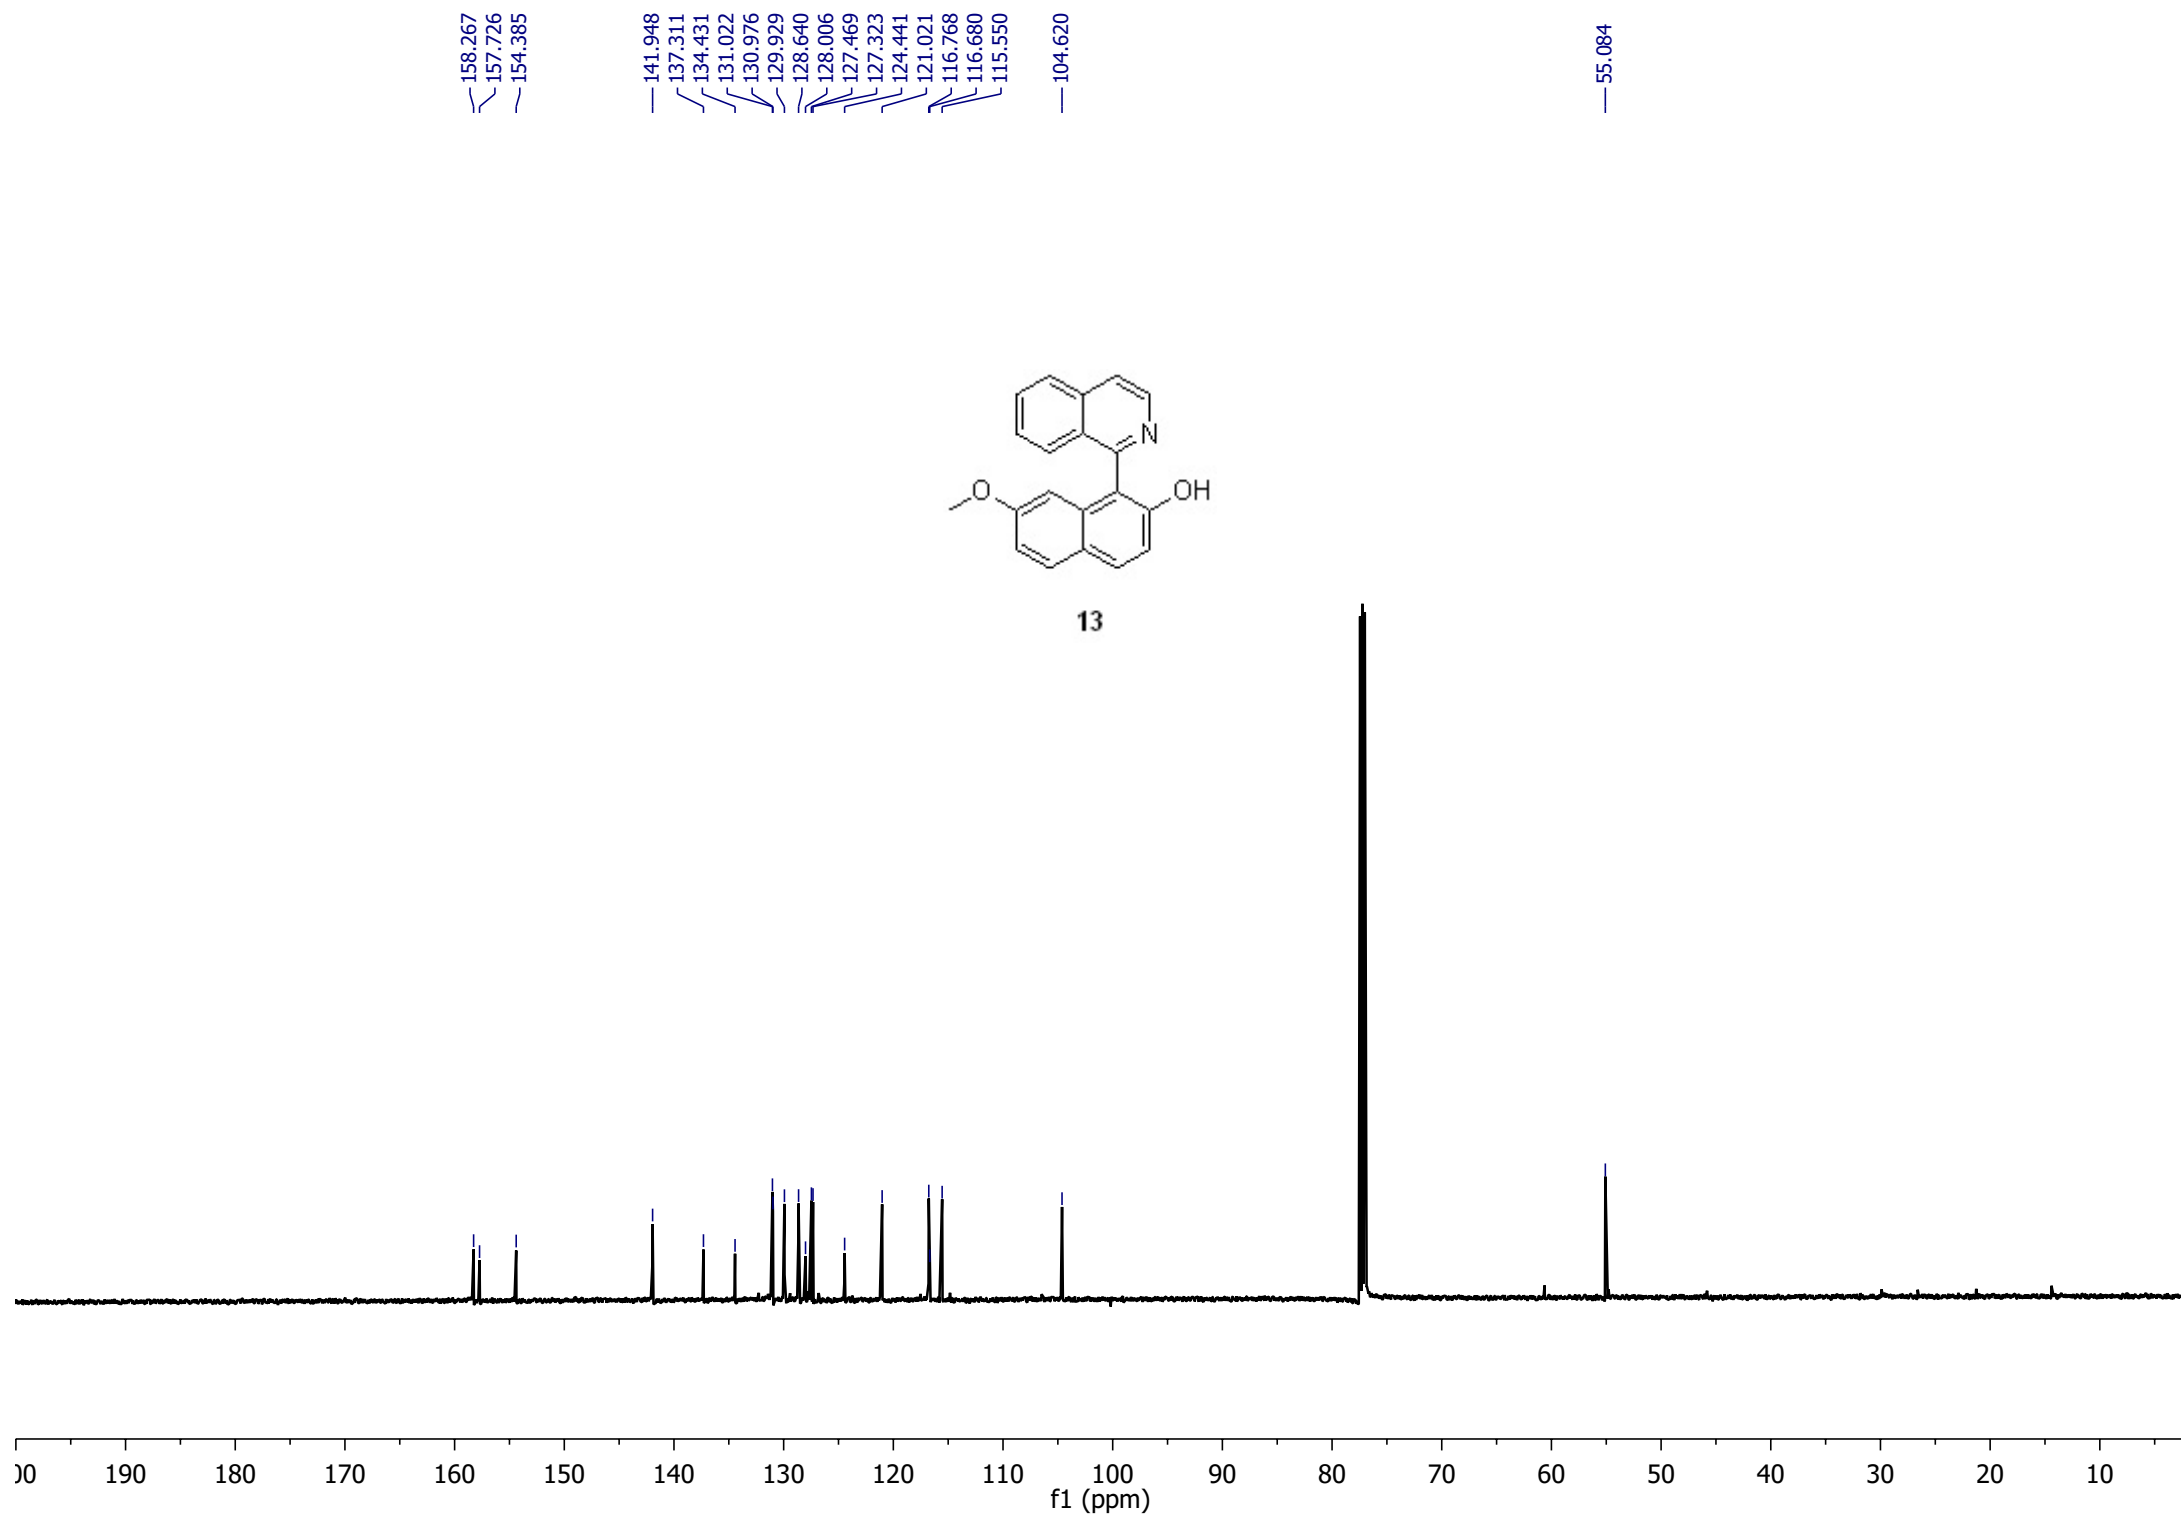

Supplement: c8ob02309c1.pdf [file c8ob02309c1.pdf]
